# Supplementary material for: Genome-Wide Sequence and Expression Analysis of the NAC Transcription Factor Family in Polyploid Wheat
Source: Oxford University Press journal article supplement (doi:10.1534/g3.117.043679), 2017-07-11
Supplement: 043679_figures1.pdf [file 043679_figures1.pdf]

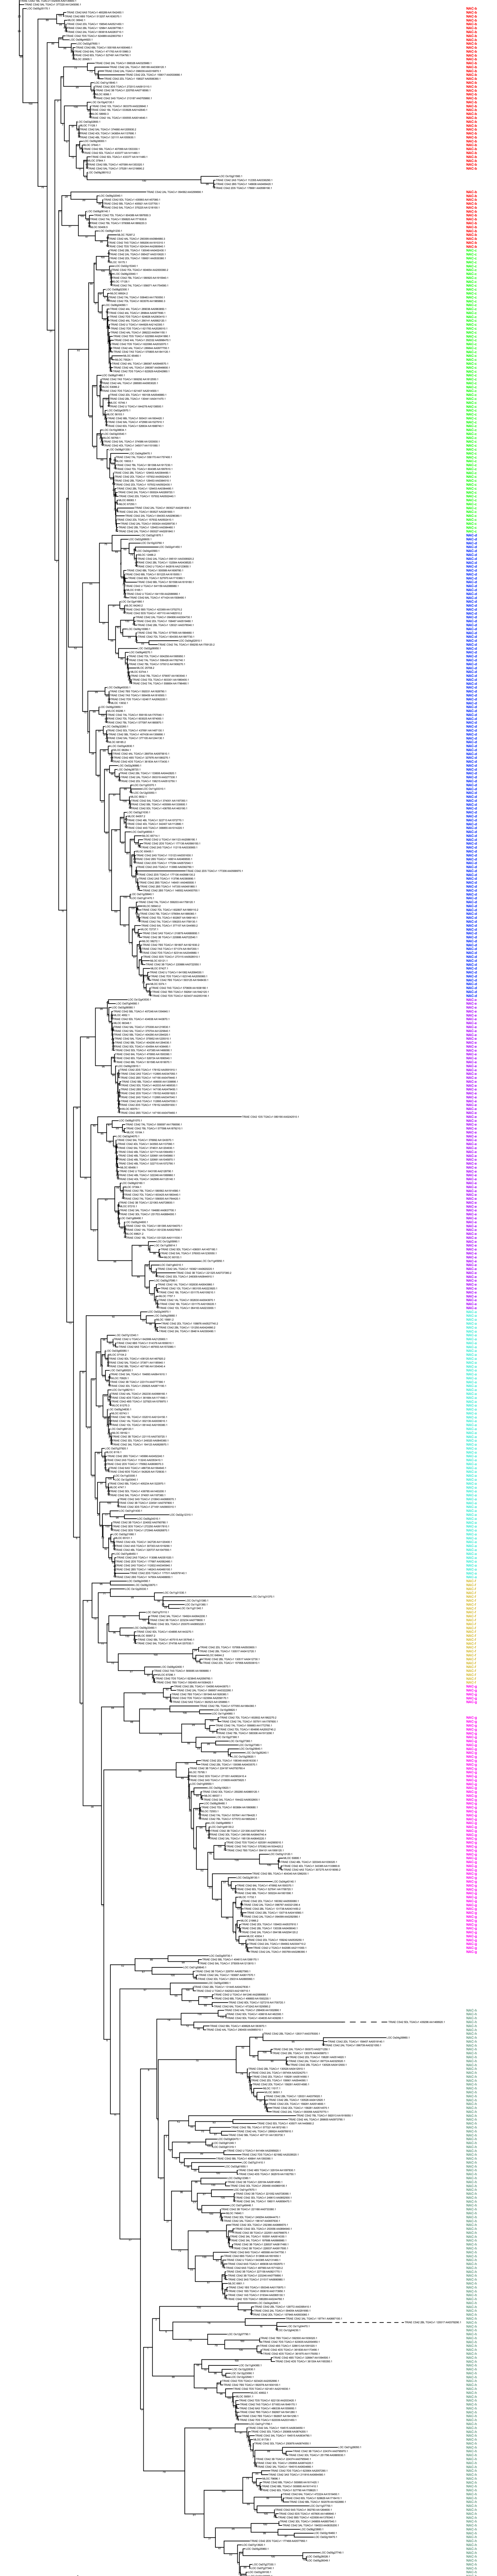

Figure S1. Maximum likelihood phylogeny of wheat, barley and rice NAC transcription factor proteins constructed using the NAC domain. Bootstrap values are indicated for each branch. The NAC group for each protein is described at the right of the image according to the classification of rice and barley proteins. In cases where the NAC group different from the rest of the clade this information has been omitted. Dashed branches have been shortened to improve readability.
