# Supplementary material for: Genome-Wide Sequence and Expression Analysis of the NAC Transcription Factor Family in Polyploid Wheat
Source: G3 (Bethesda). 2017 Jul 11;7(9):3019–29. doi: 10.1534/g3.117.043679 (PMC5592928; doi:10.1534/g3.117.043679)
Supplement: Supplementary file 5 [file 3019TableS2.xlsx]

## Sheet: triticum_aestivum_TFs
Table S2. Wheat transcription factor family genes with gene model confidence levels.
Gene	Transcript	Confidence	Family
TRIAE_CS42_1AL_TGACv1_002863_AA0045640	TRIAE_CS42_1AL_TGACv1_002863_AA0045640.1	High	RAV
TRIAE_CS42_1BL_TGACv1_032596_AA0131790	TRIAE_CS42_1BL_TGACv1_032596_AA0131790.1	High	RAV
TRIAE_CS42_1AL_TGACv1_001872_AA0036170	TRIAE_CS42_1AL_TGACv1_001872_AA0036170.1	High	RAV
TRIAE_CS42_1BL_TGACv1_033328_AA0138790	TRIAE_CS42_1BL_TGACv1_033328_AA0138790.1	High	RAV
TRIAE_CS42_1AL_TGACv1_002863_AA0045650	TRIAE_CS42_1AL_TGACv1_002863_AA0045650.1	High	RAV
TRIAE_CS42_1BL_TGACv1_033120_AA0137150	TRIAE_CS42_1BL_TGACv1_033120_AA0137150.1	High	RAV
TRIAE_CS42_1AL_TGACv1_000008_AA0000270	TRIAE_CS42_1AL_TGACv1_000008_AA0000270.1	Low	FAR1
TRIAE_CS42_1AL_TGACv1_000032_AA0000960	TRIAE_CS42_1AL_TGACv1_000032_AA0000960.1	High	GRAS
TRIAE_CS42_1AL_TGACv1_000056_AA0001800	TRIAE_CS42_1AL_TGACv1_000056_AA0001800.1	High	NF-YB
TRIAE_CS42_1AL_TGACv1_000056_AA0001800	TRIAE_CS42_1AL_TGACv1_000056_AA0001800.2	High	NF-YB
TRIAE_CS42_1AL_TGACv1_000066_AA0002060	TRIAE_CS42_1AL_TGACv1_000066_AA0002060.1	Low	bHLH
TRIAE_CS42_1AL_TGACv1_000066_AA0002070	TRIAE_CS42_1AL_TGACv1_000066_AA0002070.1	High	bHLH
TRIAE_CS42_1AL_TGACv1_000098_AA0003200	TRIAE_CS42_1AL_TGACv1_000098_AA0003200.1	High	E2F/DP
TRIAE_CS42_1AL_TGACv1_000099_AA0003310	TRIAE_CS42_1AL_TGACv1_000099_AA0003310.1	High	FAR1
TRIAE_CS42_1AL_TGACv1_000117_AA0003930	TRIAE_CS42_1AL_TGACv1_000117_AA0003930.1	Low	FAR1
TRIAE_CS42_1AL_TGACv1_000129_AA0004160	TRIAE_CS42_1AL_TGACv1_000129_AA0004160.1	High	NAC
TRIAE_CS42_1AL_TGACv1_000129_AA0004160	TRIAE_CS42_1AL_TGACv1_000129_AA0004160.2	High	NAC
TRIAE_CS42_1AL_TGACv1_000129_AA0004160	TRIAE_CS42_1AL_TGACv1_000129_AA0004160.3	High	NAC
TRIAE_CS42_1AL_TGACv1_000129_AA0004160	TRIAE_CS42_1AL_TGACv1_000129_AA0004160.4	High	NAC
TRIAE_CS42_1AL_TGACv1_000156_AA0004990	TRIAE_CS42_1AL_TGACv1_000156_AA0004990.1	High	YABBY
TRIAE_CS42_1AL_TGACv1_000156_AA0004990	TRIAE_CS42_1AL_TGACv1_000156_AA0004990.2	High	YABBY
TRIAE_CS42_1AL_TGACv1_000183_AA0005570	TRIAE_CS42_1AL_TGACv1_000183_AA0005570.1	Low	FAR1
TRIAE_CS42_1AL_TGACv1_000184_AA0005630	TRIAE_CS42_1AL_TGACv1_000184_AA0005630.1	High	FAR1
TRIAE_CS42_1AL_TGACv1_000184_AA0005630	TRIAE_CS42_1AL_TGACv1_000184_AA0005630.2	High	FAR1
TRIAE_CS42_1AL_TGACv1_000249_AA0007270	TRIAE_CS42_1AL_TGACv1_000249_AA0007270.1	High	WRKY
TRIAE_CS42_1AL_TGACv1_000254_AA0007360	TRIAE_CS42_1AL_TGACv1_000254_AA0007360.1	High	bHLH
TRIAE_CS42_1AL_TGACv1_000298_AA0008240	TRIAE_CS42_1AL_TGACv1_000298_AA0008240.1	High	bHLH
TRIAE_CS42_1AL_TGACv1_000322_AA0008690	TRIAE_CS42_1AL_TGACv1_000322_AA0008690.1	High	GATA
TRIAE_CS42_1AL_TGACv1_000360_AA0009950	TRIAE_CS42_1AL_TGACv1_000360_AA0009950.1	High	CPP
TRIAE_CS42_1AL_TGACv1_000360_AA0009960	TRIAE_CS42_1AL_TGACv1_000360_AA0009960.1	High	CPP
TRIAE_CS42_1AL_TGACv1_000360_AA0009960	TRIAE_CS42_1AL_TGACv1_000360_AA0009960.2	High	CPP
TRIAE_CS42_1AL_TGACv1_000360_AA0009990	TRIAE_CS42_1AL_TGACv1_000360_AA0009990.1	High	CPP
TRIAE_CS42_1AL_TGACv1_000405_AA0011280	TRIAE_CS42_1AL_TGACv1_000405_AA0011280.1	High	WRKY
TRIAE_CS42_1AL_TGACv1_000406_AA0011290	TRIAE_CS42_1AL_TGACv1_000406_AA0011290.1	High	GRAS
TRIAE_CS42_1AL_TGACv1_000429_AA0011910	TRIAE_CS42_1AL_TGACv1_000429_AA0011910.1	Low	FAR1
TRIAE_CS42_1AL_TGACv1_000455_AA0012500	TRIAE_CS42_1AL_TGACv1_000455_AA0012500.1	Low	FAR1
TRIAE_CS42_1AL_TGACv1_000470_AA0012860	TRIAE_CS42_1AL_TGACv1_000470_AA0012860.1	High	bZIP
TRIAE_CS42_1AL_TGACv1_000532_AA0014050	TRIAE_CS42_1AL_TGACv1_000532_AA0014050.1	High	GATA
TRIAE_CS42_1AL_TGACv1_000532_AA0014050	TRIAE_CS42_1AL_TGACv1_000532_AA0014050.2	High	GATA
TRIAE_CS42_1AL_TGACv1_000532_AA0014050	TRIAE_CS42_1AL_TGACv1_000532_AA0014050.3	High	GATA
TRIAE_CS42_1AL_TGACv1_000540_AA0014290	TRIAE_CS42_1AL_TGACv1_000540_AA0014290.1	High	Trihelix
TRIAE_CS42_1AL_TGACv1_000540_AA0014290	TRIAE_CS42_1AL_TGACv1_000540_AA0014290.2	High	Trihelix
TRIAE_CS42_1AL_TGACv1_000540_AA0014290	TRIAE_CS42_1AL_TGACv1_000540_AA0014290.3	High	Trihelix
TRIAE_CS42_1AL_TGACv1_000555_AA0014640	TRIAE_CS42_1AL_TGACv1_000555_AA0014640.1	High	NAC
TRIAE_CS42_1AL_TGACv1_000609_AA0015680	TRIAE_CS42_1AL_TGACv1_000609_AA0015680.1	Low	FAR1
TRIAE_CS42_1AL_TGACv1_000644_AA0016380	TRIAE_CS42_1AL_TGACv1_000644_AA0016380.1	High	bZIP
TRIAE_CS42_1AL_TGACv1_000666_AA0016610	TRIAE_CS42_1AL_TGACv1_000666_AA0016610.1	High	LBD
TRIAE_CS42_1AL_TGACv1_000669_AA0016760	TRIAE_CS42_1AL_TGACv1_000669_AA0016760.1	High	GRAS
TRIAE_CS42_1AL_TGACv1_000680_AA0016890	TRIAE_CS42_1AL_TGACv1_000680_AA0016890.1	High	WRKY
TRIAE_CS42_1AL_TGACv1_000720_AA0017800	TRIAE_CS42_1AL_TGACv1_000720_AA0017800.1	Low	FAR1
TRIAE_CS42_1AL_TGACv1_000774_AA0018900	TRIAE_CS42_1AL_TGACv1_000774_AA0018900.1	Low	FAR1
TRIAE_CS42_1AL_TGACv1_000795_AA0019310	TRIAE_CS42_1AL_TGACv1_000795_AA0019310.1	Low	FAR1
TRIAE_CS42_1AL_TGACv1_000812_AA0019550	TRIAE_CS42_1AL_TGACv1_000812_AA0019550.1	High	bZIP
TRIAE_CS42_1AL_TGACv1_000840_AA0020120	TRIAE_CS42_1AL_TGACv1_000840_AA0020120.1	Low	WRKY
TRIAE_CS42_1AL_TGACv1_001007_AA0023470	TRIAE_CS42_1AL_TGACv1_001007_AA0023470.1	High	bZIP
TRIAE_CS42_1AL_TGACv1_001101_AA0024940	TRIAE_CS42_1AL_TGACv1_001101_AA0024940.1	High	WRKY
TRIAE_CS42_1AL_TGACv1_001145_AA0025920	TRIAE_CS42_1AL_TGACv1_001145_AA0025920.1	Low	bHLH
TRIAE_CS42_1AL_TGACv1_001183_AA0026630	TRIAE_CS42_1AL_TGACv1_001183_AA0026630.1	High	HSF
TRIAE_CS42_1AL_TGACv1_001183_AA0026630	TRIAE_CS42_1AL_TGACv1_001183_AA0026630.2	High	HSF
TRIAE_CS42_1AL_TGACv1_001188_AA0026750	TRIAE_CS42_1AL_TGACv1_001188_AA0026750.1	High	FAR1
TRIAE_CS42_1AL_TGACv1_001222_AA0027220	TRIAE_CS42_1AL_TGACv1_001222_AA0027220.1	High	SRS
TRIAE_CS42_1AL_TGACv1_001239_AA0027650	TRIAE_CS42_1AL_TGACv1_001239_AA0027650.1	High	NAC
TRIAE_CS42_1AL_TGACv1_001348_AA0029040	TRIAE_CS42_1AL_TGACv1_001348_AA0029040.1	High	WRKY
TRIAE_CS42_1AL_TGACv1_001348_AA0029060	TRIAE_CS42_1AL_TGACv1_001348_AA0029060.1	High	WRKY
TRIAE_CS42_1AL_TGACv1_001353_AA0029190	TRIAE_CS42_1AL_TGACv1_001353_AA0029190.1	High	SBP
TRIAE_CS42_1AL_TGACv1_001353_AA0029190	TRIAE_CS42_1AL_TGACv1_001353_AA0029190.2	High	SBP
TRIAE_CS42_1AL_TGACv1_001353_AA0029190	TRIAE_CS42_1AL_TGACv1_001353_AA0029190.3	High	SBP
TRIAE_CS42_1AL_TGACv1_001373_AA0029470	TRIAE_CS42_1AL_TGACv1_001373_AA0029470.1	High	bZIP
TRIAE_CS42_1AL_TGACv1_001381_AA0029640	TRIAE_CS42_1AL_TGACv1_001381_AA0029640.1	High	Dof
TRIAE_CS42_1AL_TGACv1_001399_AA0030080	TRIAE_CS42_1AL_TGACv1_001399_AA0030080.1	High	FAR1
TRIAE_CS42_1AL_TGACv1_001399_AA0030080	TRIAE_CS42_1AL_TGACv1_001399_AA0030080.2	High	FAR1
TRIAE_CS42_1AL_TGACv1_001439_AA0030590	TRIAE_CS42_1AL_TGACv1_001439_AA0030590.1	Low	bHLH
TRIAE_CS42_1AL_TGACv1_001502_AA0031480	TRIAE_CS42_1AL_TGACv1_001502_AA0031480.1	High	GRAS
TRIAE_CS42_1AL_TGACv1_001526_AA0031740	TRIAE_CS42_1AL_TGACv1_001526_AA0031740.1	High	NF-YC
TRIAE_CS42_1AL_TGACv1_001618_AA0033020	TRIAE_CS42_1AL_TGACv1_001618_AA0033020.1	Low	FAR1
TRIAE_CS42_1AL_TGACv1_001653_AA0033650	TRIAE_CS42_1AL_TGACv1_001653_AA0033650.1	High	bZIP
TRIAE_CS42_1AL_TGACv1_001653_AA0033650	TRIAE_CS42_1AL_TGACv1_001653_AA0033650.2	High	bZIP
TRIAE_CS42_1AL_TGACv1_001653_AA0033650	TRIAE_CS42_1AL_TGACv1_001653_AA0033650.3	High	bZIP
TRIAE_CS42_1AL_TGACv1_001658_AA0033690	TRIAE_CS42_1AL_TGACv1_001658_AA0033690.1	High	bHLH
TRIAE_CS42_1AL_TGACv1_001658_AA0033690	TRIAE_CS42_1AL_TGACv1_001658_AA0033690.2	High	bHLH
TRIAE_CS42_1AL_TGACv1_001746_AA0034520	TRIAE_CS42_1AL_TGACv1_001746_AA0034520.1	High	TCP
TRIAE_CS42_1AL_TGACv1_001753_AA0034660	TRIAE_CS42_1AL_TGACv1_001753_AA0034660.1	High	VOZ
TRIAE_CS42_1AL_TGACv1_001758_AA0034810	TRIAE_CS42_1AL_TGACv1_001758_AA0034810.1	High	bZIP
TRIAE_CS42_1AL_TGACv1_001758_AA0034810	TRIAE_CS42_1AL_TGACv1_001758_AA0034810.2	High	bZIP
TRIAE_CS42_1AL_TGACv1_001758_AA0034810	TRIAE_CS42_1AL_TGACv1_001758_AA0034810.3	High	bZIP
TRIAE_CS42_1AL_TGACv1_001840_AA0035730	TRIAE_CS42_1AL_TGACv1_001840_AA0035730.1	Low	WRKY
TRIAE_CS42_1AL_TGACv1_001845_AA0035770	TRIAE_CS42_1AL_TGACv1_001845_AA0035770.1	High	GATA
TRIAE_CS42_1AL_TGACv1_001859_AA0035910	TRIAE_CS42_1AL_TGACv1_001859_AA0035910.1	High	WRKY
TRIAE_CS42_1AL_TGACv1_001859_AA0035910	TRIAE_CS42_1AL_TGACv1_001859_AA0035910.2	High	WRKY
TRIAE_CS42_1AL_TGACv1_001860_AA0035950	TRIAE_CS42_1AL_TGACv1_001860_AA0035950.1	High	FAR1
TRIAE_CS42_1AL_TGACv1_001888_AA0036310	TRIAE_CS42_1AL_TGACv1_001888_AA0036310.1	High	FAR1
TRIAE_CS42_1AL_TGACv1_001922_AA0036750	TRIAE_CS42_1AL_TGACv1_001922_AA0036750.1	High	ZF-HD
TRIAE_CS42_1AL_TGACv1_001982_AA0037420	TRIAE_CS42_1AL_TGACv1_001982_AA0037420.1	High	GATA
TRIAE_CS42_1AL_TGACv1_002051_AA0038150	TRIAE_CS42_1AL_TGACv1_002051_AA0038150.1	High	WRKY
TRIAE_CS42_1AL_TGACv1_002060_AA0038240	TRIAE_CS42_1AL_TGACv1_002060_AA0038240.1	High	bHLH
TRIAE_CS42_1AL_TGACv1_002060_AA0038240	TRIAE_CS42_1AL_TGACv1_002060_AA0038240.2	High	bHLH
TRIAE_CS42_1AL_TGACv1_002107_AA0038760	TRIAE_CS42_1AL_TGACv1_002107_AA0038760.1	High	GATA
TRIAE_CS42_1AL_TGACv1_002115_AA0038840	TRIAE_CS42_1AL_TGACv1_002115_AA0038840.1	High	Trihelix
TRIAE_CS42_1AL_TGACv1_002139_AA0039010	TRIAE_CS42_1AL_TGACv1_002139_AA0039010.1	High	NAC
TRIAE_CS42_1AL_TGACv1_002175_AA0039470	TRIAE_CS42_1AL_TGACv1_002175_AA0039470.1	High	Dof
TRIAE_CS42_1AL_TGACv1_002254_AA0040110	TRIAE_CS42_1AL_TGACv1_002254_AA0040110.1	Low	BES1
TRIAE_CS42_1AL_TGACv1_002273_AA0040370	TRIAE_CS42_1AL_TGACv1_002273_AA0040370.1	High	WRKY
TRIAE_CS42_1AL_TGACv1_002331_AA0040910	TRIAE_CS42_1AL_TGACv1_002331_AA0040910.1	High	bHLH
TRIAE_CS42_1AL_TGACv1_002343_AA0041010	TRIAE_CS42_1AL_TGACv1_002343_AA0041010.1	High	FAR1
TRIAE_CS42_1AL_TGACv1_002537_AA0042930	TRIAE_CS42_1AL_TGACv1_002537_AA0042930.1	High	WRKY
TRIAE_CS42_1AL_TGACv1_002617_AA0043700	TRIAE_CS42_1AL_TGACv1_002617_AA0043700.1	High	CPP
TRIAE_CS42_1AL_TGACv1_002617_AA0043700	TRIAE_CS42_1AL_TGACv1_002617_AA0043700.2	High	CPP
TRIAE_CS42_1AL_TGACv1_002630_AA0043960	TRIAE_CS42_1AL_TGACv1_002630_AA0043960.1	High	NAC
TRIAE_CS42_1AL_TGACv1_002630_AA0043970	TRIAE_CS42_1AL_TGACv1_002630_AA0043970.1	High	NAC
TRIAE_CS42_1AL_TGACv1_002725_AA0044760	TRIAE_CS42_1AL_TGACv1_002725_AA0044760.1	High	WRKY
TRIAE_CS42_1AL_TGACv1_002725_AA0044780	TRIAE_CS42_1AL_TGACv1_002725_AA0044780.1	High	WRKY
TRIAE_CS42_1AL_TGACv1_002725_AA0044790	TRIAE_CS42_1AL_TGACv1_002725_AA0044790.1	High	WRKY
TRIAE_CS42_1AL_TGACv1_002771_AA0045040	TRIAE_CS42_1AL_TGACv1_002771_AA0045040.1	Low	FAR1
TRIAE_CS42_1AL_TGACv1_002809_AA0045280	TRIAE_CS42_1AL_TGACv1_002809_AA0045280.1	High	WRKY
TRIAE_CS42_1AL_TGACv1_002888_AA0045890	TRIAE_CS42_1AL_TGACv1_002888_AA0045890.1	Low	FAR1
TRIAE_CS42_1AL_TGACv1_002900_AA0046040	TRIAE_CS42_1AL_TGACv1_002900_AA0046040.1	High	Dof
TRIAE_CS42_1AL_TGACv1_002976_AA0046880	TRIAE_CS42_1AL_TGACv1_002976_AA0046880.1	High	WRKY
TRIAE_CS42_1AL_TGACv1_003011_AA0047120	TRIAE_CS42_1AL_TGACv1_003011_AA0047120.1	Low	WRKY
TRIAE_CS42_1AL_TGACv1_003076_AA0047480	TRIAE_CS42_1AL_TGACv1_003076_AA0047480.1	Low	FAR1
TRIAE_CS42_1AL_TGACv1_003124_AA0048030	TRIAE_CS42_1AL_TGACv1_003124_AA0048030.1	High	HSF
TRIAE_CS42_1AL_TGACv1_003143_AA0048160	TRIAE_CS42_1AL_TGACv1_003143_AA0048160.1	Low	FAR1
TRIAE_CS42_1AL_TGACv1_003234_AA0048840	TRIAE_CS42_1AL_TGACv1_003234_AA0048840.1	High	Trihelix
TRIAE_CS42_1AL_TGACv1_003382_AA0049440	TRIAE_CS42_1AL_TGACv1_003382_AA0049440.1	High	LBD
TRIAE_CS42_1AL_TGACv1_003398_AA0049530	TRIAE_CS42_1AL_TGACv1_003398_AA0049530.1	High	bZIP
TRIAE_CS42_1AL_TGACv1_003398_AA0049530	TRIAE_CS42_1AL_TGACv1_003398_AA0049530.2	High	bZIP
TRIAE_CS42_1AL_TGACv1_003414_AA0049610	TRIAE_CS42_1AL_TGACv1_003414_AA0049610.1	High	WRKY
TRIAE_CS42_1AL_TGACv1_003609_AA0050690	TRIAE_CS42_1AL_TGACv1_003609_AA0050690.1	Low	FAR1
TRIAE_CS42_1AL_TGACv1_003886_AA0051850	TRIAE_CS42_1AL_TGACv1_003886_AA0051850.1	High	FAR1
TRIAE_CS42_1AL_TGACv1_004028_AA0052270	TRIAE_CS42_1AL_TGACv1_004028_AA0052270.1	Low	FAR1
TRIAE_CS42_1AL_TGACv1_004279_AA0053030	TRIAE_CS42_1AL_TGACv1_004279_AA0053030.1	High	NF-YC
TRIAE_CS42_1AL_TGACv1_004279_AA0053030	TRIAE_CS42_1AL_TGACv1_004279_AA0053030.2	High	NF-YC
TRIAE_CS42_1AL_TGACv1_004279_AA0053030	TRIAE_CS42_1AL_TGACv1_004279_AA0053030.3	High	NF-YC
TRIAE_CS42_1AL_TGACv1_004360_AA0053310	TRIAE_CS42_1AL_TGACv1_004360_AA0053310.1	High	NF-YC
TRIAE_CS42_1AL_TGACv1_004720_AA0054090	TRIAE_CS42_1AL_TGACv1_004720_AA0054090.1	High	GRAS
TRIAE_CS42_1AL_TGACv1_013419_AA0056170	TRIAE_CS42_1AL_TGACv1_013419_AA0056170.1	High	FAR1
TRIAE_CS42_1AS_TGACv1_019004_AA0057700	TRIAE_CS42_1AS_TGACv1_019004_AA0057700.1	Low	FAR1
TRIAE_CS42_1AS_TGACv1_019004_AA0057730	TRIAE_CS42_1AS_TGACv1_019004_AA0057730.1	High	bZIP
TRIAE_CS42_1AS_TGACv1_019017_AA0058060	TRIAE_CS42_1AS_TGACv1_019017_AA0058060.1	High	Trihelix
TRIAE_CS42_1AS_TGACv1_019017_AA0058060	TRIAE_CS42_1AS_TGACv1_019017_AA0058060.2	High	Trihelix
TRIAE_CS42_1AS_TGACv1_019020_AA0058150	TRIAE_CS42_1AS_TGACv1_019020_AA0058150.1	Low	FAR1
TRIAE_CS42_1AS_TGACv1_019033_AA0058470	TRIAE_CS42_1AS_TGACv1_019033_AA0058470.1	High	HSF
TRIAE_CS42_1AS_TGACv1_019033_AA0058470	TRIAE_CS42_1AS_TGACv1_019033_AA0058470.2	High	HSF
TRIAE_CS42_1AS_TGACv1_019033_AA0058470	TRIAE_CS42_1AS_TGACv1_019033_AA0058470.3	High	HSF
TRIAE_CS42_1AS_TGACv1_019045_AA0058870	TRIAE_CS42_1AS_TGACv1_019045_AA0058870.2	High	bHLH
TRIAE_CS42_1AS_TGACv1_019045_AA0058870	TRIAE_CS42_1AS_TGACv1_019045_AA0058870.3	High	bHLH
TRIAE_CS42_1AS_TGACv1_019066_AA0059550	TRIAE_CS42_1AS_TGACv1_019066_AA0059550.1	High	FAR1
TRIAE_CS42_1AS_TGACv1_019131_AA0061200	TRIAE_CS42_1AS_TGACv1_019131_AA0061200.1	High	FAR1
TRIAE_CS42_1AS_TGACv1_019159_AA0061820	TRIAE_CS42_1AS_TGACv1_019159_AA0061820.1	High	FAR1
TRIAE_CS42_1AS_TGACv1_019159_AA0061820	TRIAE_CS42_1AS_TGACv1_019159_AA0061820.2	High	FAR1
TRIAE_CS42_1AS_TGACv1_019159_AA0061820	TRIAE_CS42_1AS_TGACv1_019159_AA0061820.3	High	FAR1
TRIAE_CS42_1AS_TGACv1_019159_AA0061820	TRIAE_CS42_1AS_TGACv1_019159_AA0061820.4	High	FAR1
TRIAE_CS42_1AS_TGACv1_019302_AA0064590	TRIAE_CS42_1AS_TGACv1_019302_AA0064590.1	High	GRAS
TRIAE_CS42_1AS_TGACv1_019308_AA0064700	TRIAE_CS42_1AS_TGACv1_019308_AA0064700.1	High	ZF-HD
TRIAE_CS42_1AS_TGACv1_019311_AA0064780	TRIAE_CS42_1AS_TGACv1_019311_AA0064780.1	High	FAR1
TRIAE_CS42_1AS_TGACv1_019344_AA0065130	TRIAE_CS42_1AS_TGACv1_019344_AA0065130.1	High	NAC
TRIAE_CS42_1AS_TGACv1_019344_AA0065150	TRIAE_CS42_1AS_TGACv1_019344_AA0065150.1	High	bHLH
TRIAE_CS42_1AS_TGACv1_019480_AA0067170	TRIAE_CS42_1AS_TGACv1_019480_AA0067170.1	High	bHLH
TRIAE_CS42_1AS_TGACv1_019485_AA0067230	TRIAE_CS42_1AS_TGACv1_019485_AA0067230.1	High	FAR1
TRIAE_CS42_1AS_TGACv1_019570_AA0068550	TRIAE_CS42_1AS_TGACv1_019570_AA0068550.1	High	WRKY
TRIAE_CS42_1AS_TGACv1_019570_AA0068550	TRIAE_CS42_1AS_TGACv1_019570_AA0068550.2	High	WRKY
TRIAE_CS42_1AS_TGACv1_019570_AA0068550	TRIAE_CS42_1AS_TGACv1_019570_AA0068550.3	High	WRKY
TRIAE_CS42_1AS_TGACv1_019572_AA0068580	TRIAE_CS42_1AS_TGACv1_019572_AA0068580.1	High	GATA
TRIAE_CS42_1AS_TGACv1_019621_AA0069050	TRIAE_CS42_1AS_TGACv1_019621_AA0069050.1	Low	FAR1
TRIAE_CS42_1AS_TGACv1_019631_AA0069120	TRIAE_CS42_1AS_TGACv1_019631_AA0069120.1	High	FAR1
TRIAE_CS42_1AS_TGACv1_019833_AA0071860	TRIAE_CS42_1AS_TGACv1_019833_AA0071860.2	High	FAR1
TRIAE_CS42_1AS_TGACv1_019833_AA0071860	TRIAE_CS42_1AS_TGACv1_019833_AA0071860.3	High	FAR1
TRIAE_CS42_1AS_TGACv1_019894_AA0072590	TRIAE_CS42_1AS_TGACv1_019894_AA0072590.1	High	bHLH
TRIAE_CS42_1AS_TGACv1_019926_AA0072930	TRIAE_CS42_1AS_TGACv1_019926_AA0072930.1	Low	FAR1
TRIAE_CS42_1AS_TGACv1_019933_AA0073000	TRIAE_CS42_1AS_TGACv1_019933_AA0073000.1	High	GRAS
TRIAE_CS42_1AS_TGACv1_019933_AA0073010	TRIAE_CS42_1AS_TGACv1_019933_AA0073010.1	High	GRAS
TRIAE_CS42_1AS_TGACv1_019933_AA0073030	TRIAE_CS42_1AS_TGACv1_019933_AA0073030.1	High	GRAS
TRIAE_CS42_1AS_TGACv1_019984_AA0073590	TRIAE_CS42_1AS_TGACv1_019984_AA0073590.1	High	bZIP
TRIAE_CS42_1AS_TGACv1_020054_AA0074350	TRIAE_CS42_1AS_TGACv1_020054_AA0074350.1	Low	FAR1
TRIAE_CS42_1AS_TGACv1_020099_AA0074670	TRIAE_CS42_1AS_TGACv1_020099_AA0074670.1	High	LBD
TRIAE_CS42_1AS_TGACv1_020280_AA0076270	TRIAE_CS42_1AS_TGACv1_020280_AA0076270.1	Low	bHLH
TRIAE_CS42_1AS_TGACv1_020356_AA0076900	TRIAE_CS42_1AS_TGACv1_020356_AA0076900.1	High	FAR1
TRIAE_CS42_1AS_TGACv1_020414_AA0077370	TRIAE_CS42_1AS_TGACv1_020414_AA0077370.1	High	FAR1
TRIAE_CS42_1AS_TGACv1_020446_AA0077530	TRIAE_CS42_1AS_TGACv1_020446_AA0077530.1	High	FAR1
TRIAE_CS42_1AS_TGACv1_020711_AA0079350	TRIAE_CS42_1AS_TGACv1_020711_AA0079350.1	Low	FAR1
TRIAE_CS42_1AS_TGACv1_020901_AA0080430	TRIAE_CS42_1AS_TGACv1_020901_AA0080430.1	Low	FAR1
TRIAE_CS42_1AS_TGACv1_021109_AA0081010	TRIAE_CS42_1AS_TGACv1_021109_AA0081010.1	High	Dof
TRIAE_CS42_1AS_TGACv1_026255_AA0082940	TRIAE_CS42_1AS_TGACv1_026255_AA0082940.1	High	WRKY
TRIAE_CS42_1BL_TGACv1_030267_AA0084640	TRIAE_CS42_1BL_TGACv1_030267_AA0084640.1	High	WRKY
TRIAE_CS42_1BL_TGACv1_030284_AA0085290	TRIAE_CS42_1BL_TGACv1_030284_AA0085290.1	Low	FAR1
TRIAE_CS42_1BL_TGACv1_030293_AA0085670	TRIAE_CS42_1BL_TGACv1_030293_AA0085670.1	Low	FAR1
TRIAE_CS42_1BL_TGACv1_030315_AA0086420	TRIAE_CS42_1BL_TGACv1_030315_AA0086420.1	Low	FAR1
TRIAE_CS42_1BL_TGACv1_030333_AA0087110	TRIAE_CS42_1BL_TGACv1_030333_AA0087110.1	Low	Trihelix
TRIAE_CS42_1BL_TGACv1_030342_AA0087380	TRIAE_CS42_1BL_TGACv1_030342_AA0087380.1	High	Trihelix
TRIAE_CS42_1BL_TGACv1_030342_AA0087380	TRIAE_CS42_1BL_TGACv1_030342_AA0087380.2	High	Trihelix
TRIAE_CS42_1BL_TGACv1_030350_AA0087720	TRIAE_CS42_1BL_TGACv1_030350_AA0087720.1	High	GATA
TRIAE_CS42_1BL_TGACv1_030350_AA0087770	TRIAE_CS42_1BL_TGACv1_030350_AA0087770.1	High	ZF-HD
TRIAE_CS42_1BL_TGACv1_030407_AA0089750	TRIAE_CS42_1BL_TGACv1_030407_AA0089750.1	High	CPP
TRIAE_CS42_1BL_TGACv1_030407_AA0089760	TRIAE_CS42_1BL_TGACv1_030407_AA0089760.1	High	CPP
TRIAE_CS42_1BL_TGACv1_030407_AA0089760	TRIAE_CS42_1BL_TGACv1_030407_AA0089760.2	High	CPP
TRIAE_CS42_1BL_TGACv1_030416_AA0090080	TRIAE_CS42_1BL_TGACv1_030416_AA0090080.1	High	SRS
TRIAE_CS42_1BL_TGACv1_030467_AA0091660	TRIAE_CS42_1BL_TGACv1_030467_AA0091660.1	High	FAR1
TRIAE_CS42_1BL_TGACv1_030467_AA0091660	TRIAE_CS42_1BL_TGACv1_030467_AA0091660.2	High	FAR1
TRIAE_CS42_1BL_TGACv1_030506_AA0092700	TRIAE_CS42_1BL_TGACv1_030506_AA0092700.1	High	bHLH
TRIAE_CS42_1BL_TGACv1_030508_AA0092770	TRIAE_CS42_1BL_TGACv1_030508_AA0092770.1	High	bZIP
TRIAE_CS42_1BL_TGACv1_030551_AA0093810	TRIAE_CS42_1BL_TGACv1_030551_AA0093810.1	Low	bHLH
TRIAE_CS42_1BL_TGACv1_030579_AA0094640	TRIAE_CS42_1BL_TGACv1_030579_AA0094640.1	High	NF-YC
TRIAE_CS42_1BL_TGACv1_030606_AA0095590	TRIAE_CS42_1BL_TGACv1_030606_AA0095590.1	High	bHLH
TRIAE_CS42_1BL_TGACv1_030619_AA0095970	TRIAE_CS42_1BL_TGACv1_030619_AA0095970.1	High	LBD
TRIAE_CS42_1BL_TGACv1_030626_AA0096240	TRIAE_CS42_1BL_TGACv1_030626_AA0096240.1	High	GATA
TRIAE_CS42_1BL_TGACv1_030682_AA0097820	TRIAE_CS42_1BL_TGACv1_030682_AA0097820.1	Low	Trihelix
TRIAE_CS42_1BL_TGACv1_030683_AA0097840	TRIAE_CS42_1BL_TGACv1_030683_AA0097840.1	High	WRKY
TRIAE_CS42_1BL_TGACv1_030713_AA0098750	TRIAE_CS42_1BL_TGACv1_030713_AA0098750.1	High	NF-YC
TRIAE_CS42_1BL_TGACv1_030713_AA0098750	TRIAE_CS42_1BL_TGACv1_030713_AA0098750.2	High	NF-YC
TRIAE_CS42_1BL_TGACv1_030714_AA0098810	TRIAE_CS42_1BL_TGACv1_030714_AA0098810.1	High	WRKY
TRIAE_CS42_1BL_TGACv1_030714_AA0098830	TRIAE_CS42_1BL_TGACv1_030714_AA0098830.1	High	WRKY
TRIAE_CS42_1BL_TGACv1_030714_AA0098840	TRIAE_CS42_1BL_TGACv1_030714_AA0098840.1	High	WRKY
TRIAE_CS42_1BL_TGACv1_030791_AA0100840	TRIAE_CS42_1BL_TGACv1_030791_AA0100840.1	Low	FAR1
TRIAE_CS42_1BL_TGACv1_030819_AA0101510	TRIAE_CS42_1BL_TGACv1_030819_AA0101510.1	High	SBP
TRIAE_CS42_1BL_TGACv1_030819_AA0101510	TRIAE_CS42_1BL_TGACv1_030819_AA0101510.2	High	SBP
TRIAE_CS42_1BL_TGACv1_030819_AA0101510	TRIAE_CS42_1BL_TGACv1_030819_AA0101510.3	High	SBP
TRIAE_CS42_1BL_TGACv1_030819_AA0101510	TRIAE_CS42_1BL_TGACv1_030819_AA0101510.4	High	SBP
TRIAE_CS42_1BL_TGACv1_030848_AA0102180	TRIAE_CS42_1BL_TGACv1_030848_AA0102180.1	High	bHLH
TRIAE_CS42_1BL_TGACv1_030868_AA0102650	TRIAE_CS42_1BL_TGACv1_030868_AA0102650.1	Low	FAR1
TRIAE_CS42_1BL_TGACv1_031006_AA0105660	TRIAE_CS42_1BL_TGACv1_031006_AA0105660.1	High	FAR1
TRIAE_CS42_1BL_TGACv1_031023_AA0106040	TRIAE_CS42_1BL_TGACv1_031023_AA0106040.1	Low	FAR1
TRIAE_CS42_1BL_TGACv1_031026_AA0106070	TRIAE_CS42_1BL_TGACv1_031026_AA0106070.1	High	WRKY
TRIAE_CS42_1BL_TGACv1_031026_AA0106080	TRIAE_CS42_1BL_TGACv1_031026_AA0106080.1	High	WRKY
TRIAE_CS42_1BL_TGACv1_031030_AA0106240	TRIAE_CS42_1BL_TGACv1_031030_AA0106240.1	High	GATA
TRIAE_CS42_1BL_TGACv1_031037_AA0106450	TRIAE_CS42_1BL_TGACv1_031037_AA0106450.1	High	bHLH
TRIAE_CS42_1BL_TGACv1_031075_AA0107190	TRIAE_CS42_1BL_TGACv1_031075_AA0107190.1	High	WRKY
TRIAE_CS42_1BL_TGACv1_031075_AA0107190	TRIAE_CS42_1BL_TGACv1_031075_AA0107190.2	High	WRKY
TRIAE_CS42_1BL_TGACv1_031075_AA0107210	TRIAE_CS42_1BL_TGACv1_031075_AA0107210.1	High	WRKY
TRIAE_CS42_1BL_TGACv1_031105_AA0107810	TRIAE_CS42_1BL_TGACv1_031105_AA0107810.1	Low	FAR1
TRIAE_CS42_1BL_TGACv1_031126_AA0108220	TRIAE_CS42_1BL_TGACv1_031126_AA0108220.1	Low	FAR1
TRIAE_CS42_1BL_TGACv1_031127_AA0108290	TRIAE_CS42_1BL_TGACv1_031127_AA0108290.1	High	CPP
TRIAE_CS42_1BL_TGACv1_031127_AA0108290	TRIAE_CS42_1BL_TGACv1_031127_AA0108290.2	High	CPP
TRIAE_CS42_1BL_TGACv1_031127_AA0108290	TRIAE_CS42_1BL_TGACv1_031127_AA0108290.3	High	CPP
TRIAE_CS42_1BL_TGACv1_031159_AA0108940	TRIAE_CS42_1BL_TGACv1_031159_AA0108940.1	High	HSF
TRIAE_CS42_1BL_TGACv1_031159_AA0108940	TRIAE_CS42_1BL_TGACv1_031159_AA0108940.2	High	HSF
TRIAE_CS42_1BL_TGACv1_031171_AA0109130	TRIAE_CS42_1BL_TGACv1_031171_AA0109130.1	Low	FAR1
TRIAE_CS42_1BL_TGACv1_031175_AA0109210	TRIAE_CS42_1BL_TGACv1_031175_AA0109210.1	High	NAC
TRIAE_CS42_1BL_TGACv1_031175_AA0109220	TRIAE_CS42_1BL_TGACv1_031175_AA0109220.1	High	NAC
TRIAE_CS42_1BL_TGACv1_031232_AA0110020	TRIAE_CS42_1BL_TGACv1_031232_AA0110020.1	High	WRKY
TRIAE_CS42_1BL_TGACv1_031232_AA0110020	TRIAE_CS42_1BL_TGACv1_031232_AA0110020.2	High	WRKY
TRIAE_CS42_1BL_TGACv1_031235_AA0110070	TRIAE_CS42_1BL_TGACv1_031235_AA0110070.1	High	GATA
TRIAE_CS42_1BL_TGACv1_031237_AA0110100	TRIAE_CS42_1BL_TGACv1_031237_AA0110100.1	High	bZIP
TRIAE_CS42_1BL_TGACv1_031241_AA0110230	TRIAE_CS42_1BL_TGACv1_031241_AA0110230.1	High	WRKY
TRIAE_CS42_1BL_TGACv1_031320_AA0111530	TRIAE_CS42_1BL_TGACv1_031320_AA0111530.1	High	NAC
TRIAE_CS42_1BL_TGACv1_031335_AA0111850	TRIAE_CS42_1BL_TGACv1_031335_AA0111850.1	Low	NF-YC
TRIAE_CS42_1BL_TGACv1_031367_AA0112570	TRIAE_CS42_1BL_TGACv1_031367_AA0112570.2	High	CPP
TRIAE_CS42_1BL_TGACv1_031428_AA0113850	TRIAE_CS42_1BL_TGACv1_031428_AA0113850.1	High	bZIP
TRIAE_CS42_1BL_TGACv1_031428_AA0113850	TRIAE_CS42_1BL_TGACv1_031428_AA0113850.2	High	bZIP
TRIAE_CS42_1BL_TGACv1_031428_AA0113850	TRIAE_CS42_1BL_TGACv1_031428_AA0113850.3	High	bZIP
TRIAE_CS42_1BL_TGACv1_031428_AA0113850	TRIAE_CS42_1BL_TGACv1_031428_AA0113850.4	High	bZIP
TRIAE_CS42_1BL_TGACv1_031428_AA0113850	TRIAE_CS42_1BL_TGACv1_031428_AA0113850.5	High	bZIP
TRIAE_CS42_1BL_TGACv1_031443_AA0114190	TRIAE_CS42_1BL_TGACv1_031443_AA0114190.1	High	HSF
TRIAE_CS42_1BL_TGACv1_031443_AA0114190	TRIAE_CS42_1BL_TGACv1_031443_AA0114190.2	High	HSF
TRIAE_CS42_1BL_TGACv1_031443_AA0114190	TRIAE_CS42_1BL_TGACv1_031443_AA0114190.3	High	HSF
TRIAE_CS42_1BL_TGACv1_031451_AA0114360	TRIAE_CS42_1BL_TGACv1_031451_AA0114360.1	High	CPP
TRIAE_CS42_1BL_TGACv1_031455_AA0114460	TRIAE_CS42_1BL_TGACv1_031455_AA0114460.1	High	E2F/DP
TRIAE_CS42_1BL_TGACv1_031472_AA0114780	TRIAE_CS42_1BL_TGACv1_031472_AA0114780.1	Low	FAR1
TRIAE_CS42_1BL_TGACv1_031589_AA0116590	TRIAE_CS42_1BL_TGACv1_031589_AA0116590.1	Low	FAR1
TRIAE_CS42_1BL_TGACv1_031651_AA0117900	TRIAE_CS42_1BL_TGACv1_031651_AA0117900.1	High	Dof
TRIAE_CS42_1BL_TGACv1_031695_AA0119050	TRIAE_CS42_1BL_TGACv1_031695_AA0119050.1	Low	FAR1
TRIAE_CS42_1BL_TGACv1_031721_AA0119720	TRIAE_CS42_1BL_TGACv1_031721_AA0119720.1	High	Trihelix
TRIAE_CS42_1BL_TGACv1_031862_AA0121890	TRIAE_CS42_1BL_TGACv1_031862_AA0121890.1	High	GRAS
TRIAE_CS42_1BL_TGACv1_031863_AA0121910	TRIAE_CS42_1BL_TGACv1_031863_AA0121910.1	High	WRKY
TRIAE_CS42_1BL_TGACv1_031873_AA0122080	TRIAE_CS42_1BL_TGACv1_031873_AA0122080.1	High	bZIP
TRIAE_CS42_1BL_TGACv1_031957_AA0123490	TRIAE_CS42_1BL_TGACv1_031957_AA0123490.1	High	Dof
TRIAE_CS42_1BL_TGACv1_032010_AA0124150	TRIAE_CS42_1BL_TGACv1_032010_AA0124150.1	High	NAC
TRIAE_CS42_1BL_TGACv1_032060_AA0124910	TRIAE_CS42_1BL_TGACv1_032060_AA0124910.1	High	WRKY
TRIAE_CS42_1BL_TGACv1_032095_AA0125380	TRIAE_CS42_1BL_TGACv1_032095_AA0125380.1	Low	FAR1
TRIAE_CS42_1BL_TGACv1_032158_AA0126150	TRIAE_CS42_1BL_TGACv1_032158_AA0126150.1	High	FAR1
TRIAE_CS42_1BL_TGACv1_032158_AA0126150	TRIAE_CS42_1BL_TGACv1_032158_AA0126150.2	High	FAR1
TRIAE_CS42_1BL_TGACv1_032191_AA0126580	TRIAE_CS42_1BL_TGACv1_032191_AA0126580.1	High	STAT
TRIAE_CS42_1BL_TGACv1_032191_AA0126580	TRIAE_CS42_1BL_TGACv1_032191_AA0126580.2	High	STAT
TRIAE_CS42_1BL_TGACv1_032201_AA0126620	TRIAE_CS42_1BL_TGACv1_032201_AA0126620.1	High	WRKY
TRIAE_CS42_1BL_TGACv1_032241_AA0127300	TRIAE_CS42_1BL_TGACv1_032241_AA0127300.1	High	bZIP
TRIAE_CS42_1BL_TGACv1_032360_AA0128880	TRIAE_CS42_1BL_TGACv1_032360_AA0128880.1	High	GRAS
TRIAE_CS42_1BL_TGACv1_032369_AA0129030	TRIAE_CS42_1BL_TGACv1_032369_AA0129030.1	High	bHLH
TRIAE_CS42_1BL_TGACv1_032488_AA0130420	TRIAE_CS42_1BL_TGACv1_032488_AA0130420.1	High	bZIP
TRIAE_CS42_1BL_TGACv1_032502_AA0130590	TRIAE_CS42_1BL_TGACv1_032502_AA0130590.1	High	Trihelix
TRIAE_CS42_1BL_TGACv1_032508_AA0130690	TRIAE_CS42_1BL_TGACv1_032508_AA0130690.1	High	FAR1
TRIAE_CS42_1BL_TGACv1_032508_AA0130690	TRIAE_CS42_1BL_TGACv1_032508_AA0130690.2	High	FAR1
TRIAE_CS42_1BL_TGACv1_032508_AA0130690	TRIAE_CS42_1BL_TGACv1_032508_AA0130690.3	High	FAR1
TRIAE_CS42_1BL_TGACv1_032508_AA0130690	TRIAE_CS42_1BL_TGACv1_032508_AA0130690.4	High	FAR1
TRIAE_CS42_1BL_TGACv1_032555_AA0131420	TRIAE_CS42_1BL_TGACv1_032555_AA0131420.1	High	VOZ
TRIAE_CS42_1BL_TGACv1_032665_AA0132590	TRIAE_CS42_1BL_TGACv1_032665_AA0132590.1	High	GRAS
TRIAE_CS42_1BL_TGACv1_032668_AA0132630	TRIAE_CS42_1BL_TGACv1_032668_AA0132630.1	High	FAR1
TRIAE_CS42_1BL_TGACv1_032668_AA0132630	TRIAE_CS42_1BL_TGACv1_032668_AA0132630.2	High	FAR1
TRIAE_CS42_1BL_TGACv1_032795_AA0134240	TRIAE_CS42_1BL_TGACv1_032795_AA0134240.1	High	LBD
TRIAE_CS42_1BL_TGACv1_032935_AA0135600	TRIAE_CS42_1BL_TGACv1_032935_AA0135600.1	High	NAC
TRIAE_CS42_1BL_TGACv1_032935_AA0135600	TRIAE_CS42_1BL_TGACv1_032935_AA0135600.3	High	NAC
TRIAE_CS42_1BL_TGACv1_033059_AA0136530	TRIAE_CS42_1BL_TGACv1_033059_AA0136530.1	High	bZIP
TRIAE_CS42_1BL_TGACv1_033059_AA0136530	TRIAE_CS42_1BL_TGACv1_033059_AA0136530.2	High	bZIP
TRIAE_CS42_1BL_TGACv1_033075_AA0136770	TRIAE_CS42_1BL_TGACv1_033075_AA0136770.1	Low	FAR1
TRIAE_CS42_1BL_TGACv1_033076_AA0136810	TRIAE_CS42_1BL_TGACv1_033076_AA0136810.1	High	NF-YB
TRIAE_CS42_1BL_TGACv1_033076_AA0136810	TRIAE_CS42_1BL_TGACv1_033076_AA0136810.2	High	NF-YB
TRIAE_CS42_1BL_TGACv1_033155_AA0137410	TRIAE_CS42_1BL_TGACv1_033155_AA0137410.1	High	YABBY
TRIAE_CS42_1BL_TGACv1_033263_AA0138260	TRIAE_CS42_1BL_TGACv1_033263_AA0138260.1	High	WRKY
TRIAE_CS42_1BL_TGACv1_033309_AA0138640	TRIAE_CS42_1BL_TGACv1_033309_AA0138640.1	High	TCP
TRIAE_CS42_1BL_TGACv1_033567_AA0140400	TRIAE_CS42_1BL_TGACv1_033567_AA0140400.1	High	GATA
TRIAE_CS42_1BL_TGACv1_033627_AA0140780	TRIAE_CS42_1BL_TGACv1_033627_AA0140780.1	Low	FAR1
TRIAE_CS42_1BL_TGACv1_033649_AA0141030	TRIAE_CS42_1BL_TGACv1_033649_AA0141030.1	High	WRKY
TRIAE_CS42_1BL_TGACv1_033699_AA0141460	TRIAE_CS42_1BL_TGACv1_033699_AA0141460.1	High	FAR1
TRIAE_CS42_1BL_TGACv1_033767_AA0141960	TRIAE_CS42_1BL_TGACv1_033767_AA0141960.1	Low	CPP
TRIAE_CS42_1BL_TGACv1_033889_AA0142540	TRIAE_CS42_1BL_TGACv1_033889_AA0142540.1	High	Dof
TRIAE_CS42_1BL_TGACv1_033928_AA0142640	TRIAE_CS42_1BL_TGACv1_033928_AA0142640.1	High	NAC
TRIAE_CS42_1BL_TGACv1_034100_AA0143390	TRIAE_CS42_1BL_TGACv1_034100_AA0143390.1	Low	FAR1
TRIAE_CS42_1BL_TGACv1_034148_AA0143620	TRIAE_CS42_1BL_TGACv1_034148_AA0143620.1	High	WRKY
TRIAE_CS42_1BL_TGACv1_034558_AA0144860	TRIAE_CS42_1BL_TGACv1_034558_AA0144860.1	High	WRKY
TRIAE_CS42_1BL_TGACv1_034576_AA0144930	TRIAE_CS42_1BL_TGACv1_034576_AA0144930.1	High	CPP
TRIAE_CS42_1BL_TGACv1_034678_AA0145290	TRIAE_CS42_1BL_TGACv1_034678_AA0145290.1	High	bHLH
TRIAE_CS42_1BL_TGACv1_034684_AA0145340	TRIAE_CS42_1BL_TGACv1_034684_AA0145340.1	High	FAR1
TRIAE_CS42_1BL_TGACv1_035347_AA0146460	TRIAE_CS42_1BL_TGACv1_035347_AA0146460.1	High	GRAS
TRIAE_CS42_1BL_TGACv1_035780_AA0147040	TRIAE_CS42_1BL_TGACv1_035780_AA0147040.1	Low	CPP
TRIAE_CS42_1BL_TGACv1_035798_AA0147050	TRIAE_CS42_1BL_TGACv1_035798_AA0147050.1	Low	FAR1
TRIAE_CS42_1BL_TGACv1_045961_AA0149070	TRIAE_CS42_1BL_TGACv1_045961_AA0149070.1	Low	GRAS
TRIAE_CS42_1BS_TGACv1_049365_AA0150750	TRIAE_CS42_1BS_TGACv1_049365_AA0150750.1	Low	E2F/DP
TRIAE_CS42_1BS_TGACv1_049372_AA0151040	TRIAE_CS42_1BS_TGACv1_049372_AA0151040.1	Low	FAR1
TRIAE_CS42_1BS_TGACv1_049387_AA0151790	TRIAE_CS42_1BS_TGACv1_049387_AA0151790.1	Low	FAR1
TRIAE_CS42_1BS_TGACv1_049391_AA0151880	TRIAE_CS42_1BS_TGACv1_049391_AA0151880.1	Low	FAR1
TRIAE_CS42_1BS_TGACv1_049398_AA0152090	TRIAE_CS42_1BS_TGACv1_049398_AA0152090.1	High	FAR1
TRIAE_CS42_1BS_TGACv1_049405_AA0152530	TRIAE_CS42_1BS_TGACv1_049405_AA0152530.1	High	LBD
TRIAE_CS42_1BS_TGACv1_049407_AA0152610	TRIAE_CS42_1BS_TGACv1_049407_AA0152610.1	Low	FAR1
TRIAE_CS42_1BS_TGACv1_049550_AA0156630	TRIAE_CS42_1BS_TGACv1_049550_AA0156630.1	Low	ZF-HD
TRIAE_CS42_1BS_TGACv1_049550_AA0156650	TRIAE_CS42_1BS_TGACv1_049550_AA0156650.1	Low	ZF-HD
TRIAE_CS42_1BS_TGACv1_049601_AA0157510	TRIAE_CS42_1BS_TGACv1_049601_AA0157510.1	High	bHLH
TRIAE_CS42_1BS_TGACv1_049601_AA0157510	TRIAE_CS42_1BS_TGACv1_049601_AA0157510.2	High	bHLH
TRIAE_CS42_1BS_TGACv1_049601_AA0157510	TRIAE_CS42_1BS_TGACv1_049601_AA0157510.3	High	bHLH
TRIAE_CS42_1BS_TGACv1_049609_AA0157790	TRIAE_CS42_1BS_TGACv1_049609_AA0157790.1	High	GRAS
TRIAE_CS42_1BS_TGACv1_049609_AA0157810	TRIAE_CS42_1BS_TGACv1_049609_AA0157810.1	High	GRAS
TRIAE_CS42_1BS_TGACv1_049609_AA0157820	TRIAE_CS42_1BS_TGACv1_049609_AA0157820.1	Low	GRAS
TRIAE_CS42_1BS_TGACv1_049609_AA0157830	TRIAE_CS42_1BS_TGACv1_049609_AA0157830.1	High	GRAS
TRIAE_CS42_1BS_TGACv1_049609_AA0157840	TRIAE_CS42_1BS_TGACv1_049609_AA0157840.1	Low	GRAS
TRIAE_CS42_1BS_TGACv1_049609_AA0157850	TRIAE_CS42_1BS_TGACv1_049609_AA0157850.1	Low	GRAS
TRIAE_CS42_1BS_TGACv1_049643_AA0158710	TRIAE_CS42_1BS_TGACv1_049643_AA0158710.1	High	ZF-HD
TRIAE_CS42_1BS_TGACv1_049686_AA0159590	TRIAE_CS42_1BS_TGACv1_049686_AA0159590.1	Low	FAR1
TRIAE_CS42_1BS_TGACv1_049763_AA0161060	TRIAE_CS42_1BS_TGACv1_049763_AA0161060.1	High	bZIP
TRIAE_CS42_1BS_TGACv1_049763_AA0161060	TRIAE_CS42_1BS_TGACv1_049763_AA0161060.2	High	bZIP
TRIAE_CS42_1BS_TGACv1_049763_AA0161060	TRIAE_CS42_1BS_TGACv1_049763_AA0161060.3	High	bZIP
TRIAE_CS42_1BS_TGACv1_049766_AA0161140	TRIAE_CS42_1BS_TGACv1_049766_AA0161140.1	Low	FAR1
TRIAE_CS42_1BS_TGACv1_049786_AA0161460	TRIAE_CS42_1BS_TGACv1_049786_AA0161460.1	High	bHLH
TRIAE_CS42_1BS_TGACv1_049880_AA0163470	TRIAE_CS42_1BS_TGACv1_049880_AA0163470.1	Low	NAC
TRIAE_CS42_1BS_TGACv1_049881_AA0163510	TRIAE_CS42_1BS_TGACv1_049881_AA0163510.1	High	bHLH
TRIAE_CS42_1BS_TGACv1_049907_AA0163910	TRIAE_CS42_1BS_TGACv1_049907_AA0163910.1	High	bHLH
TRIAE_CS42_1BS_TGACv1_049975_AA0165270	TRIAE_CS42_1BS_TGACv1_049975_AA0165270.1	High	Trihelix
TRIAE_CS42_1BS_TGACv1_050002_AA0165690	TRIAE_CS42_1BS_TGACv1_050002_AA0165690.1	High	FAR1
TRIAE_CS42_1BS_TGACv1_050089_AA0167270	TRIAE_CS42_1BS_TGACv1_050089_AA0167270.1	Low	ZF-HD
TRIAE_CS42_1BS_TGACv1_050216_AA0169110	TRIAE_CS42_1BS_TGACv1_050216_AA0169110.1	High	Dof
TRIAE_CS42_1BS_TGACv1_050216_AA0169110	TRIAE_CS42_1BS_TGACv1_050216_AA0169110.2	High	Dof
TRIAE_CS42_1BS_TGACv1_050217_AA0169130	TRIAE_CS42_1BS_TGACv1_050217_AA0169130.1	Low	FAR1
TRIAE_CS42_1BS_TGACv1_050235_AA0169360	TRIAE_CS42_1BS_TGACv1_050235_AA0169360.1	Low	GATA
TRIAE_CS42_1BS_TGACv1_050349_AA0170970	TRIAE_CS42_1BS_TGACv1_050349_AA0170970.1	High	NAC
TRIAE_CS42_1BS_TGACv1_050349_AA0171000	TRIAE_CS42_1BS_TGACv1_050349_AA0171000.1	Low	bHLH
TRIAE_CS42_1BS_TGACv1_050389_AA0171480	TRIAE_CS42_1BS_TGACv1_050389_AA0171480.1	Low	FAR1
TRIAE_CS42_1BS_TGACv1_050389_AA0171480	TRIAE_CS42_1BS_TGACv1_050389_AA0171480.2	Low	FAR1
TRIAE_CS42_1BS_TGACv1_050404_AA0171700	TRIAE_CS42_1BS_TGACv1_050404_AA0171700.1	Low	FAR1
TRIAE_CS42_1BS_TGACv1_050487_AA0172720	TRIAE_CS42_1BS_TGACv1_050487_AA0172720.1	Low	YABBY
TRIAE_CS42_1BS_TGACv1_050534_AA0173120	TRIAE_CS42_1BS_TGACv1_050534_AA0173120.1	Low	NAC
TRIAE_CS42_1BS_TGACv1_050618_AA0173950	TRIAE_CS42_1BS_TGACv1_050618_AA0173950.1	High	NAC
TRIAE_CS42_1BS_TGACv1_050618_AA0173960	TRIAE_CS42_1BS_TGACv1_050618_AA0173960.1	High	bHLH
TRIAE_CS42_1BS_TGACv1_050618_AA0173960	TRIAE_CS42_1BS_TGACv1_050618_AA0173960.2	High	bHLH
TRIAE_CS42_1BS_TGACv1_050618_AA0173960	TRIAE_CS42_1BS_TGACv1_050618_AA0173960.3	High	bHLH
TRIAE_CS42_1BS_TGACv1_050697_AA0174510	TRIAE_CS42_1BS_TGACv1_050697_AA0174510.1	High	LBD
TRIAE_CS42_1BS_TGACv1_050697_AA0174510	TRIAE_CS42_1BS_TGACv1_050697_AA0174510.2	High	LBD
TRIAE_CS42_1BS_TGACv1_050808_AA0175770	TRIAE_CS42_1BS_TGACv1_050808_AA0175770.1	High	GATA
TRIAE_CS42_1BS_TGACv1_050837_AA0176150	TRIAE_CS42_1BS_TGACv1_050837_AA0176150.1	High	FAR1
TRIAE_CS42_1BS_TGACv1_050906_AA0176590	TRIAE_CS42_1BS_TGACv1_050906_AA0176590.1	High	WRKY
TRIAE_CS42_1BS_TGACv1_050987_AA0177060	TRIAE_CS42_1BS_TGACv1_050987_AA0177060.1	Low	ZF-HD
TRIAE_CS42_1BS_TGACv1_051048_AA0177410	TRIAE_CS42_1BS_TGACv1_051048_AA0177410.1	Low	FAR1
TRIAE_CS42_1BS_TGACv1_051414_AA0179550	TRIAE_CS42_1BS_TGACv1_051414_AA0179550.1	High	FAR1
TRIAE_CS42_1BS_TGACv1_051517_AA0180240	TRIAE_CS42_1BS_TGACv1_051517_AA0180240.1	High	FAR1
TRIAE_CS42_1BS_TGACv1_051553_AA0180400	TRIAE_CS42_1BS_TGACv1_051553_AA0180400.1	High	ZF-HD
TRIAE_CS42_1AL_TGACv1_001035_AA0023850	TRIAE_CS42_1AL_TGACv1_001035_AA0023850.1	High	ARF
TRIAE_CS42_1AL_TGACv1_001035_AA0023850	TRIAE_CS42_1AL_TGACv1_001035_AA0023850.2	High	ARF
TRIAE_CS42_1AL_TGACv1_001847_AA0035810	TRIAE_CS42_1AL_TGACv1_001847_AA0035810.1	High	ARF
TRIAE_CS42_1AL_TGACv1_001847_AA0035810	TRIAE_CS42_1AL_TGACv1_001847_AA0035810.2	High	ARF
TRIAE_CS42_1BL_TGACv1_032954_AA0135740	TRIAE_CS42_1BL_TGACv1_032954_AA0135740.1	High	ARF
TRIAE_CS42_1BL_TGACv1_032954_AA0135740	TRIAE_CS42_1BL_TGACv1_032954_AA0135740.2	High	ARF
TRIAE_CS42_1AL_TGACv1_000008_AA0000160	TRIAE_CS42_1AL_TGACv1_000008_AA0000160.1	High	B3
TRIAE_CS42_1AL_TGACv1_000512_AA0013650	TRIAE_CS42_1AL_TGACv1_000512_AA0013650.1	High	B3
TRIAE_CS42_1AL_TGACv1_000581_AA0015010	TRIAE_CS42_1AL_TGACv1_000581_AA0015010.1	High	B3
TRIAE_CS42_1AL_TGACv1_000964_AA0022820	TRIAE_CS42_1AL_TGACv1_000964_AA0022820.1	Low	B3
TRIAE_CS42_1AL_TGACv1_001231_AA0027490	TRIAE_CS42_1AL_TGACv1_001231_AA0027490.1	High	B3
TRIAE_CS42_1AL_TGACv1_001231_AA0027490	TRIAE_CS42_1AL_TGACv1_001231_AA0027490.2	High	B3
TRIAE_CS42_1AL_TGACv1_001269_AA0028070	TRIAE_CS42_1AL_TGACv1_001269_AA0028070.1	Low	B3
TRIAE_CS42_1AL_TGACv1_001410_AA0030220	TRIAE_CS42_1AL_TGACv1_001410_AA0030220.1	Low	B3
TRIAE_CS42_1AL_TGACv1_001518_AA0031640	TRIAE_CS42_1AL_TGACv1_001518_AA0031640.1	Low	B3
TRIAE_CS42_1AL_TGACv1_001794_AA0035250	TRIAE_CS42_1AL_TGACv1_001794_AA0035250.1	High	B3
TRIAE_CS42_1AL_TGACv1_002265_AA0040250	TRIAE_CS42_1AL_TGACv1_002265_AA0040250.1	Low	B3
TRIAE_CS42_1AL_TGACv1_002800_AA0045250	TRIAE_CS42_1AL_TGACv1_002800_AA0045250.1	Low	B3
TRIAE_CS42_1AL_TGACv1_016892_AA0056520	TRIAE_CS42_1AL_TGACv1_016892_AA0056520.1	High	B3
TRIAE_CS42_1AS_TGACv1_019058_AA0059250	TRIAE_CS42_1AS_TGACv1_019058_AA0059250.1	High	B3
TRIAE_CS42_1AS_TGACv1_019983_AA0073560	TRIAE_CS42_1AS_TGACv1_019983_AA0073560.1	High	B3
TRIAE_CS42_1AS_TGACv1_019983_AA0073560	TRIAE_CS42_1AS_TGACv1_019983_AA0073560.2	High	B3
TRIAE_CS42_1BL_TGACv1_030562_AA0094060	TRIAE_CS42_1BL_TGACv1_030562_AA0094060.1	Low	B3
TRIAE_CS42_1BL_TGACv1_030734_AA0099430	TRIAE_CS42_1BL_TGACv1_030734_AA0099430.1	High	B3
TRIAE_CS42_1BL_TGACv1_030734_AA0099430	TRIAE_CS42_1BL_TGACv1_030734_AA0099430.2	High	B3
TRIAE_CS42_1BL_TGACv1_030734_AA0099430	TRIAE_CS42_1BL_TGACv1_030734_AA0099430.3	High	B3
TRIAE_CS42_1BL_TGACv1_030734_AA0099430	TRIAE_CS42_1BL_TGACv1_030734_AA0099430.4	High	B3
TRIAE_CS42_1BL_TGACv1_030734_AA0099430	TRIAE_CS42_1BL_TGACv1_030734_AA0099430.5	High	B3
TRIAE_CS42_1BL_TGACv1_030734_AA0099430	TRIAE_CS42_1BL_TGACv1_030734_AA0099430.6	High	B3
TRIAE_CS42_1BL_TGACv1_030734_AA0099430	TRIAE_CS42_1BL_TGACv1_030734_AA0099430.7	High	B3
TRIAE_CS42_1BL_TGACv1_030734_AA0099430	TRIAE_CS42_1BL_TGACv1_030734_AA0099430.8	High	B3
TRIAE_CS42_1BL_TGACv1_030734_AA0099430	TRIAE_CS42_1BL_TGACv1_030734_AA0099430.9	High	B3
TRIAE_CS42_1BL_TGACv1_030992_AA0105200	TRIAE_CS42_1BL_TGACv1_030992_AA0105200.1	High	B3
TRIAE_CS42_1BL_TGACv1_031498_AA0115130	TRIAE_CS42_1BL_TGACv1_031498_AA0115130.1	High	B3
TRIAE_CS42_1BL_TGACv1_031640_AA0117710	TRIAE_CS42_1BL_TGACv1_031640_AA0117710.1	Low	B3
TRIAE_CS42_1BL_TGACv1_032219_AA0126960	TRIAE_CS42_1BL_TGACv1_032219_AA0126960.1	Low	B3
TRIAE_CS42_1BL_TGACv1_032259_AA0127610	TRIAE_CS42_1BL_TGACv1_032259_AA0127610.1	Low	B3
TRIAE_CS42_1BL_TGACv1_032389_AA0129240	TRIAE_CS42_1BL_TGACv1_032389_AA0129240.1	Low	B3
TRIAE_CS42_1BL_TGACv1_033127_AA0137220	TRIAE_CS42_1BL_TGACv1_033127_AA0137220.1	Low	B3
TRIAE_CS42_1BL_TGACv1_033228_AA0137920	TRIAE_CS42_1BL_TGACv1_033228_AA0137920.1	High	B3
TRIAE_CS42_1BL_TGACv1_033228_AA0137920	TRIAE_CS42_1BL_TGACv1_033228_AA0137920.2	High	B3
TRIAE_CS42_1BL_TGACv1_034125_AA0143540	TRIAE_CS42_1BL_TGACv1_034125_AA0143540.1	High	B3
TRIAE_CS42_1BL_TGACv1_034623_AA0145120	TRIAE_CS42_1BL_TGACv1_034623_AA0145120.1	High	B3
TRIAE_CS42_1BS_TGACv1_049495_AA0154920	TRIAE_CS42_1BS_TGACv1_049495_AA0154920.1	Low	B3
TRIAE_CS42_1BS_TGACv1_049567_AA0157030	TRIAE_CS42_1BS_TGACv1_049567_AA0157030.1	Low	B3
TRIAE_CS42_1BS_TGACv1_050093_AA0167290	TRIAE_CS42_1BS_TGACv1_050093_AA0167290.1	High	B3
TRIAE_CS42_1BS_TGACv1_050093_AA0167290	TRIAE_CS42_1BS_TGACv1_050093_AA0167290.2	High	B3
TRIAE_CS42_1BS_TGACv1_050093_AA0167290	TRIAE_CS42_1BS_TGACv1_050093_AA0167290.3	High	B3
TRIAE_CS42_1BS_TGACv1_050241_AA0169550	TRIAE_CS42_1BS_TGACv1_050241_AA0169550.1	Low	B3
TRIAE_CS42_1BS_TGACv1_050644_AA0174130	TRIAE_CS42_1BS_TGACv1_050644_AA0174130.1	Low	B3
TRIAE_CS42_1AS_TGACv1_019979_AA0073500	TRIAE_CS42_1AS_TGACv1_019979_AA0073500.1	High	AP2
TRIAE_CS42_1AS_TGACv1_019979_AA0073500	TRIAE_CS42_1AS_TGACv1_019979_AA0073500.3	High	AP2
TRIAE_CS42_1AS_TGACv1_019979_AA0073500	TRIAE_CS42_1AS_TGACv1_019979_AA0073500.5	High	AP2
TRIAE_CS42_1AS_TGACv1_019979_AA0073500	TRIAE_CS42_1AS_TGACv1_019979_AA0073500.6	High	AP2
TRIAE_CS42_1BL_TGACv1_031517_AA0115460	TRIAE_CS42_1BL_TGACv1_031517_AA0115460.1	Low	AP2
TRIAE_CS42_1BS_TGACv1_049682_AA0159520	TRIAE_CS42_1BS_TGACv1_049682_AA0159520.1	High	AP2
TRIAE_CS42_1BS_TGACv1_049682_AA0159520	TRIAE_CS42_1BS_TGACv1_049682_AA0159520.2	High	AP2
TRIAE_CS42_1BS_TGACv1_049682_AA0159520	TRIAE_CS42_1BS_TGACv1_049682_AA0159520.3	High	AP2
TRIAE_CS42_1BS_TGACv1_049682_AA0159520	TRIAE_CS42_1BS_TGACv1_049682_AA0159520.7	High	AP2
TRIAE_CS42_1AL_TGACv1_000371_AA0010510	TRIAE_CS42_1AL_TGACv1_000371_AA0010510.1	High	AP2
TRIAE_CS42_1BL_TGACv1_030996_AA0105380	TRIAE_CS42_1BL_TGACv1_030996_AA0105380.1	High	AP2
TRIAE_CS42_1BL_TGACv1_030996_AA0105380	TRIAE_CS42_1BL_TGACv1_030996_AA0105380.2	High	AP2
TRIAE_CS42_1AL_TGACv1_000567_AA0014790	TRIAE_CS42_1AL_TGACv1_000567_AA0014790.1	High	AP2
TRIAE_CS42_1BS_TGACv1_049682_AA0159520	TRIAE_CS42_1BS_TGACv1_049682_AA0159520.5	High	AP2
TRIAE_CS42_1BS_TGACv1_049682_AA0159520	TRIAE_CS42_1BS_TGACv1_049682_AA0159520.4	High	AP2
TRIAE_CS42_1BS_TGACv1_049682_AA0159520	TRIAE_CS42_1BS_TGACv1_049682_AA0159520.6	High	AP2
TRIAE_CS42_1AS_TGACv1_019979_AA0073500	TRIAE_CS42_1AS_TGACv1_019979_AA0073500.2	High	AP2
TRIAE_CS42_1AS_TGACv1_019979_AA0073500	TRIAE_CS42_1AS_TGACv1_019979_AA0073500.4	High	AP2
TRIAE_CS42_1AL_TGACv1_000361_AA0010050	TRIAE_CS42_1AL_TGACv1_000361_AA0010050.1	High	ERF
TRIAE_CS42_1AL_TGACv1_000597_AA0015470	TRIAE_CS42_1AL_TGACv1_000597_AA0015470.1	High	ERF
TRIAE_CS42_1AL_TGACv1_000668_AA0016690	TRIAE_CS42_1AL_TGACv1_000668_AA0016690.1	High	ERF
TRIAE_CS42_1AL_TGACv1_000668_AA0016720	TRIAE_CS42_1AL_TGACv1_000668_AA0016720.1	High	ERF
TRIAE_CS42_1AL_TGACv1_000668_AA0016740	TRIAE_CS42_1AL_TGACv1_000668_AA0016740.1	High	ERF
TRIAE_CS42_1AL_TGACv1_000671_AA0016790	TRIAE_CS42_1AL_TGACv1_000671_AA0016790.1	High	ERF
TRIAE_CS42_1AL_TGACv1_000814_AA0019580	TRIAE_CS42_1AL_TGACv1_000814_AA0019580.1	High	ERF
TRIAE_CS42_1AL_TGACv1_000902_AA0021500	TRIAE_CS42_1AL_TGACv1_000902_AA0021500.1	Low	ERF
TRIAE_CS42_1AL_TGACv1_000905_AA0021520	TRIAE_CS42_1AL_TGACv1_000905_AA0021520.1	High	ERF
TRIAE_CS42_1AL_TGACv1_000919_AA0021820	TRIAE_CS42_1AL_TGACv1_000919_AA0021820.1	High	ERF
TRIAE_CS42_1AL_TGACv1_001092_AA0024770	TRIAE_CS42_1AL_TGACv1_001092_AA0024770.1	High	ERF
TRIAE_CS42_1AL_TGACv1_001092_AA0024780	TRIAE_CS42_1AL_TGACv1_001092_AA0024780.1	Low	ERF
TRIAE_CS42_1AL_TGACv1_001112_AA0025320	TRIAE_CS42_1AL_TGACv1_001112_AA0025320.1	High	ERF
TRIAE_CS42_1AL_TGACv1_001205_AA0026930	TRIAE_CS42_1AL_TGACv1_001205_AA0026930.1	High	ERF
TRIAE_CS42_1AL_TGACv1_001416_AA0030250	TRIAE_CS42_1AL_TGACv1_001416_AA0030250.1	High	ERF
TRIAE_CS42_1AL_TGACv1_001672_AA0033860	TRIAE_CS42_1AL_TGACv1_001672_AA0033860.1	Low	ERF
TRIAE_CS42_1AL_TGACv1_002317_AA0040770	TRIAE_CS42_1AL_TGACv1_002317_AA0040770.1	Low	ERF
TRIAE_CS42_1AL_TGACv1_002343_AA0041030	TRIAE_CS42_1AL_TGACv1_002343_AA0041030.1	High	ERF
TRIAE_CS42_1AL_TGACv1_002432_AA0041900	TRIAE_CS42_1AL_TGACv1_002432_AA0041900.1	High	ERF
TRIAE_CS42_1AL_TGACv1_002432_AA0041900	TRIAE_CS42_1AL_TGACv1_002432_AA0041900.2	High	ERF
TRIAE_CS42_1AL_TGACv1_002432_AA0041900	TRIAE_CS42_1AL_TGACv1_002432_AA0041900.3	High	ERF
TRIAE_CS42_1AL_TGACv1_002432_AA0041900	TRIAE_CS42_1AL_TGACv1_002432_AA0041900.4	High	ERF
TRIAE_CS42_1AL_TGACv1_003164_AA0048380	TRIAE_CS42_1AL_TGACv1_003164_AA0048380.1	High	ERF
TRIAE_CS42_1AL_TGACv1_003618_AA0050750	TRIAE_CS42_1AL_TGACv1_003618_AA0050750.1	High	ERF
TRIAE_CS42_1BL_TGACv1_030266_AA0084570	TRIAE_CS42_1BL_TGACv1_030266_AA0084570.1	High	ERF
TRIAE_CS42_1BL_TGACv1_030266_AA0084590	TRIAE_CS42_1BL_TGACv1_030266_AA0084590.1	High	ERF
TRIAE_CS42_1BL_TGACv1_030609_AA0095620	TRIAE_CS42_1BL_TGACv1_030609_AA0095620.1	High	ERF
TRIAE_CS42_1BL_TGACv1_030690_AA0097990	TRIAE_CS42_1BL_TGACv1_030690_AA0097990.1	Low	ERF
TRIAE_CS42_1BL_TGACv1_030765_AA0100120	TRIAE_CS42_1BL_TGACv1_030765_AA0100120.1	High	ERF
TRIAE_CS42_1BL_TGACv1_030985_AA0105080	TRIAE_CS42_1BL_TGACv1_030985_AA0105080.1	Low	ERF
TRIAE_CS42_1BL_TGACv1_031047_AA0106680	TRIAE_CS42_1BL_TGACv1_031047_AA0106680.1	High	ERF
TRIAE_CS42_1BL_TGACv1_031098_AA0107570	TRIAE_CS42_1BL_TGACv1_031098_AA0107570.1	High	ERF
TRIAE_CS42_1BL_TGACv1_031332_AA0111760	TRIAE_CS42_1BL_TGACv1_031332_AA0111760.1	High	ERF
TRIAE_CS42_1BL_TGACv1_031346_AA0112090	TRIAE_CS42_1BL_TGACv1_031346_AA0112090.1	High	ERF
TRIAE_CS42_1BL_TGACv1_031419_AA0113650	TRIAE_CS42_1BL_TGACv1_031419_AA0113650.1	High	ERF
TRIAE_CS42_1BL_TGACv1_031660_AA0118150	TRIAE_CS42_1BL_TGACv1_031660_AA0118150.1	High	ERF
TRIAE_CS42_1BL_TGACv1_031677_AA0118600	TRIAE_CS42_1BL_TGACv1_031677_AA0118600.1	High	ERF
TRIAE_CS42_1BL_TGACv1_031711_AA0119430	TRIAE_CS42_1BL_TGACv1_031711_AA0119430.1	High	ERF
TRIAE_CS42_1BL_TGACv1_031713_AA0119490	TRIAE_CS42_1BL_TGACv1_031713_AA0119490.1	High	ERF
TRIAE_CS42_1BL_TGACv1_031713_AA0119490	TRIAE_CS42_1BL_TGACv1_031713_AA0119490.2	High	ERF
TRIAE_CS42_1BL_TGACv1_031713_AA0119490	TRIAE_CS42_1BL_TGACv1_031713_AA0119490.3	High	ERF
TRIAE_CS42_1BL_TGACv1_031753_AA0120080	TRIAE_CS42_1BL_TGACv1_031753_AA0120080.1	High	ERF
TRIAE_CS42_1BL_TGACv1_032323_AA0128370	TRIAE_CS42_1BL_TGACv1_032323_AA0128370.1	High	ERF
TRIAE_CS42_1BL_TGACv1_032766_AA0133950	TRIAE_CS42_1BL_TGACv1_032766_AA0133950.1	High	ERF
TRIAE_CS42_1BL_TGACv1_032814_AA0134350	TRIAE_CS42_1BL_TGACv1_032814_AA0134350.1	High	ERF
TRIAE_CS42_1BL_TGACv1_033279_AA0138370	TRIAE_CS42_1BL_TGACv1_033279_AA0138370.1	High	ERF
TRIAE_CS42_1BL_TGACv1_033279_AA0138370	TRIAE_CS42_1BL_TGACv1_033279_AA0138370.2	High	ERF
TRIAE_CS42_1BL_TGACv1_033319_AA0138720	TRIAE_CS42_1BL_TGACv1_033319_AA0138720.1	High	ERF
TRIAE_CS42_1BL_TGACv1_034582_AA0144940	TRIAE_CS42_1BL_TGACv1_034582_AA0144940.1	Low	ERF
TRIAE_CS42_1BS_TGACv1_049441_AA0153800	TRIAE_CS42_1BS_TGACv1_049441_AA0153800.1	Low	ERF
TRIAE_CS42_1BS_TGACv1_049727_AA0160540	TRIAE_CS42_1BS_TGACv1_049727_AA0160540.1	Low	ERF
TRIAE_CS42_1AL_TGACv1_000661_AA0016590	TRIAE_CS42_1AL_TGACv1_000661_AA0016590.1	High	G2-like
TRIAE_CS42_1AL_TGACv1_003273_AA0049040	TRIAE_CS42_1AL_TGACv1_003273_AA0049040.1	High	G2-like
TRIAE_CS42_1AL_TGACv1_003273_AA0049040	TRIAE_CS42_1AL_TGACv1_003273_AA0049040.2	High	G2-like
TRIAE_CS42_1AL_TGACv1_003273_AA0049040	TRIAE_CS42_1AL_TGACv1_003273_AA0049040.3	High	G2-like
TRIAE_CS42_1AL_TGACv1_003273_AA0049040	TRIAE_CS42_1AL_TGACv1_003273_AA0049040.4	High	G2-like
TRIAE_CS42_1AL_TGACv1_003273_AA0049040	TRIAE_CS42_1AL_TGACv1_003273_AA0049040.5	High	G2-like
TRIAE_CS42_1AL_TGACv1_003273_AA0049040	TRIAE_CS42_1AL_TGACv1_003273_AA0049040.6	High	G2-like
TRIAE_CS42_1AL_TGACv1_003273_AA0049040	TRIAE_CS42_1AL_TGACv1_003273_AA0049040.7	High	G2-like
TRIAE_CS42_1AL_TGACv1_003614_AA0050720	TRIAE_CS42_1AL_TGACv1_003614_AA0050720.1	High	G2-like
TRIAE_CS42_1AL_TGACv1_003921_AA0051940	TRIAE_CS42_1AL_TGACv1_003921_AA0051940.1	High	G2-like
TRIAE_CS42_1AL_TGACv1_003921_AA0051940	TRIAE_CS42_1AL_TGACv1_003921_AA0051940.2	High	G2-like
TRIAE_CS42_1AL_TGACv1_003960_AA0052050	TRIAE_CS42_1AL_TGACv1_003960_AA0052050.1	High	G2-like
TRIAE_CS42_1AL_TGACv1_003960_AA0052050	TRIAE_CS42_1AL_TGACv1_003960_AA0052050.2	High	G2-like
TRIAE_CS42_1BL_TGACv1_030370_AA0088260	TRIAE_CS42_1BL_TGACv1_030370_AA0088260.1	High	G2-like
TRIAE_CS42_1BL_TGACv1_030370_AA0088260	TRIAE_CS42_1BL_TGACv1_030370_AA0088260.2	High	G2-like
TRIAE_CS42_1BL_TGACv1_030421_AA0090160	TRIAE_CS42_1BL_TGACv1_030421_AA0090160.1	High	G2-like
TRIAE_CS42_1BL_TGACv1_030589_AA0094880	TRIAE_CS42_1BL_TGACv1_030589_AA0094880.1	High	G2-like
TRIAE_CS42_1BL_TGACv1_030594_AA0095110	TRIAE_CS42_1BL_TGACv1_030594_AA0095110.1	High	G2-like
TRIAE_CS42_1BL_TGACv1_030832_AA0101810	TRIAE_CS42_1BL_TGACv1_030832_AA0101810.1	High	G2-like
TRIAE_CS42_1BL_TGACv1_031661_AA0118200	TRIAE_CS42_1BL_TGACv1_031661_AA0118200.1	High	G2-like
TRIAE_CS42_1AL_TGACv1_000686_AA0017040	TRIAE_CS42_1AL_TGACv1_000686_AA0017040.1	High	MIKC
TRIAE_CS42_1AL_TGACv1_001072_AA0024490	TRIAE_CS42_1AL_TGACv1_001072_AA0024490.1	High	MIKC
TRIAE_CS42_1AL_TGACv1_002892_AA0045960	TRIAE_CS42_1AL_TGACv1_002892_AA0045960.1	High	MIKC
TRIAE_CS42_1AL_TGACv1_002892_AA0045960	TRIAE_CS42_1AL_TGACv1_002892_AA0045960.2	High	MIKC
TRIAE_CS42_1AS_TGACv1_018970_AA0057130	TRIAE_CS42_1AS_TGACv1_018970_AA0057130.1	High	MIKC
TRIAE_CS42_1AS_TGACv1_018970_AA0057130	TRIAE_CS42_1AS_TGACv1_018970_AA0057130.2	High	MIKC
TRIAE_CS42_1AS_TGACv1_019741_AA0070900	TRIAE_CS42_1AS_TGACv1_019741_AA0070900.1	High	MIKC
TRIAE_CS42_1BL_TGACv1_032898_AA0135200	TRIAE_CS42_1BL_TGACv1_032898_AA0135200.1	High	MIKC
TRIAE_CS42_1BL_TGACv1_033317_AA0138690	TRIAE_CS42_1BL_TGACv1_033317_AA0138690.1	High	MIKC
TRIAE_CS42_1BL_TGACv1_033317_AA0138690	TRIAE_CS42_1BL_TGACv1_033317_AA0138690.2	High	MIKC
TRIAE_CS42_1BS_TGACv1_049537_AA0156150	TRIAE_CS42_1BS_TGACv1_049537_AA0156150.1	High	MIKC
TRIAE_CS42_1BS_TGACv1_049537_AA0156150	TRIAE_CS42_1BS_TGACv1_049537_AA0156150.2	High	MIKC
TRIAE_CS42_1BS_TGACv1_049537_AA0156150	TRIAE_CS42_1BS_TGACv1_049537_AA0156150.3	High	MIKC
TRIAE_CS42_1BS_TGACv1_049691_AA0159690	TRIAE_CS42_1BS_TGACv1_049691_AA0159690.1	High	MIKC
TRIAE_CS42_1BS_TGACv1_049691_AA0159710	TRIAE_CS42_1BS_TGACv1_049691_AA0159710.2	High	MIKC
TRIAE_CS42_1BS_TGACv1_050417_AA0171830	TRIAE_CS42_1BS_TGACv1_050417_AA0171830.1	High	MIKC
TRIAE_CS42_1AL_TGACv1_000214_AA0006330	TRIAE_CS42_1AL_TGACv1_000214_AA0006330.1	Low	M-type
TRIAE_CS42_1AL_TGACv1_004338_AA0053240	TRIAE_CS42_1AL_TGACv1_004338_AA0053240.1	Low	M-type
TRIAE_CS42_1AS_TGACv1_019835_AA0071940	TRIAE_CS42_1AS_TGACv1_019835_AA0071940.1	Low	M-type
TRIAE_CS42_1AS_TGACv1_020519_AA0078010	TRIAE_CS42_1AS_TGACv1_020519_AA0078010.1	Low	M-type
TRIAE_CS42_1BL_TGACv1_030365_AA0088090	TRIAE_CS42_1BL_TGACv1_030365_AA0088090.1	Low	M-type
TRIAE_CS42_1BL_TGACv1_030418_AA0090100	TRIAE_CS42_1BL_TGACv1_030418_AA0090100.1	Low	M-type
TRIAE_CS42_1BL_TGACv1_030418_AA0090110	TRIAE_CS42_1BL_TGACv1_030418_AA0090110.1	High	M-type
TRIAE_CS42_1BL_TGACv1_030680_AA0097800	TRIAE_CS42_1BL_TGACv1_030680_AA0097800.1	High	M-type
TRIAE_CS42_1BL_TGACv1_031173_AA0109140	TRIAE_CS42_1BL_TGACv1_031173_AA0109140.1	Low	M-type
TRIAE_CS42_1BL_TGACv1_031830_AA0121270	TRIAE_CS42_1BL_TGACv1_031830_AA0121270.1	High	M-type
TRIAE_CS42_1BS_TGACv1_049504_AA0155300	TRIAE_CS42_1BS_TGACv1_049504_AA0155300.1	Low	M-type
TRIAE_CS42_1BS_TGACv1_049674_AA0159390	TRIAE_CS42_1BS_TGACv1_049674_AA0159390.1	High	M-type
TRIAE_CS42_1BS_TGACv1_049968_AA0165040	TRIAE_CS42_1BS_TGACv1_049968_AA0165040.1	Low	M-type
TRIAE_CS42_1AL_TGACv1_000199_AA0005900	TRIAE_CS42_1AL_TGACv1_000199_AA0005900.1	High	HB-other
TRIAE_CS42_1AL_TGACv1_000918_AA0021800	TRIAE_CS42_1AL_TGACv1_000918_AA0021800.3	High	HB-other
TRIAE_CS42_1AS_TGACv1_019512_AA0067510	TRIAE_CS42_1AS_TGACv1_019512_AA0067510.1	High	HB-other
TRIAE_CS42_1AS_TGACv1_019620_AA0069040	TRIAE_CS42_1AS_TGACv1_019620_AA0069040.1	High	HB-other
TRIAE_CS42_1AS_TGACv1_019640_AA0069280	TRIAE_CS42_1AS_TGACv1_019640_AA0069280.1	High	HB-other
TRIAE_CS42_1AS_TGACv1_019640_AA0069300	TRIAE_CS42_1AS_TGACv1_019640_AA0069300.1	High	HB-other
TRIAE_CS42_1AS_TGACv1_019640_AA0069300	TRIAE_CS42_1AS_TGACv1_019640_AA0069300.2	High	HB-other
TRIAE_CS42_1AS_TGACv1_020451_AA0077570	TRIAE_CS42_1AS_TGACv1_020451_AA0077570.1	High	HB-other
TRIAE_CS42_1AS_TGACv1_020651_AA0079120	TRIAE_CS42_1AS_TGACv1_020651_AA0079120.1	High	HB-other
TRIAE_CS42_1AS_TGACv1_022311_AA0082410	TRIAE_CS42_1AS_TGACv1_022311_AA0082410.1	Low	HB-other
TRIAE_CS42_1BL_TGACv1_030284_AA0085310	TRIAE_CS42_1BL_TGACv1_030284_AA0085310.1	High	HB-other
TRIAE_CS42_1BL_TGACv1_030284_AA0085310	TRIAE_CS42_1BL_TGACv1_030284_AA0085310.2	High	HB-other
TRIAE_CS42_1BS_TGACv1_050880_AA0176400	TRIAE_CS42_1BS_TGACv1_050880_AA0176400.1	High	HB-other
TRIAE_CS42_1BS_TGACv1_051119_AA0177860	TRIAE_CS42_1BS_TGACv1_051119_AA0177860.1	High	HB-other
TRIAE_CS42_1AS_TGACv1_019249_AA0063920	TRIAE_CS42_1AS_TGACv1_019249_AA0063920.1	High	WOX
TRIAE_CS42_1BS_TGACv1_050951_AA0176870	TRIAE_CS42_1BS_TGACv1_050951_AA0176870.1	High	WOX
TRIAE_CS42_1AL_TGACv1_000073_AA0002410	TRIAE_CS42_1AL_TGACv1_000073_AA0002410.1	High	WOX
TRIAE_CS42_1BL_TGACv1_032015_AA0124220	TRIAE_CS42_1BL_TGACv1_032015_AA0124220.1	High	WOX
TRIAE_CS42_1BL_TGACv1_033938_AA0142690	TRIAE_CS42_1BL_TGACv1_033938_AA0142690.1	High	TALE
TRIAE_CS42_1AL_TGACv1_001630_AA0033200	TRIAE_CS42_1AL_TGACv1_001630_AA0033200.1	High	TALE
TRIAE_CS42_1AL_TGACv1_001630_AA0033200	TRIAE_CS42_1AL_TGACv1_001630_AA0033200.2	High	TALE
TRIAE_CS42_1BL_TGACv1_032571_AA0131590	TRIAE_CS42_1BL_TGACv1_032571_AA0131590.1	High	TALE
TRIAE_CS42_1BL_TGACv1_032571_AA0131590	TRIAE_CS42_1BL_TGACv1_032571_AA0131590.2	High	TALE
TRIAE_CS42_1AL_TGACv1_002562_AA0043130	TRIAE_CS42_1AL_TGACv1_002562_AA0043130.1	High	TALE
TRIAE_CS42_1AL_TGACv1_002562_AA0043130	TRIAE_CS42_1AL_TGACv1_002562_AA0043130.2	High	TALE
TRIAE_CS42_1AL_TGACv1_002562_AA0043130	TRIAE_CS42_1AL_TGACv1_002562_AA0043130.3	High	TALE
TRIAE_CS42_1BL_TGACv1_032826_AA0134520	TRIAE_CS42_1BL_TGACv1_032826_AA0134520.1	High	HD-ZIP
TRIAE_CS42_1AL_TGACv1_000454_AA0012430	TRIAE_CS42_1AL_TGACv1_000454_AA0012430.1	High	HD-ZIP
TRIAE_CS42_1BL_TGACv1_032445_AA0129920	TRIAE_CS42_1BL_TGACv1_032445_AA0129920.1	High	HD-ZIP
TRIAE_CS42_1AL_TGACv1_000333_AA0009270	TRIAE_CS42_1AL_TGACv1_000333_AA0009270.1	High	HD-ZIP
TRIAE_CS42_1AS_TGACv1_019984_AA0073600	TRIAE_CS42_1AS_TGACv1_019984_AA0073600.1	High	TALE
TRIAE_CS42_1AS_TGACv1_020837_AA0080130	TRIAE_CS42_1AS_TGACv1_020837_AA0080130.1	High	TALE
TRIAE_CS42_1BS_TGACv1_049757_AA0160950	TRIAE_CS42_1BS_TGACv1_049757_AA0160950.1	High	TALE
TRIAE_CS42_1BL_TGACv1_030309_AA0086320	TRIAE_CS42_1BL_TGACv1_030309_AA0086320.3	High	HD-ZIP
TRIAE_CS42_1BL_TGACv1_030309_AA0086320	TRIAE_CS42_1BL_TGACv1_030309_AA0086320.4	High	HD-ZIP
TRIAE_CS42_1AL_TGACv1_001179_AA0026560	TRIAE_CS42_1AL_TGACv1_001179_AA0026560.2	High	HD-ZIP
TRIAE_CS42_1BL_TGACv1_030309_AA0086320	TRIAE_CS42_1BL_TGACv1_030309_AA0086320.1	High	HD-ZIP
TRIAE_CS42_1BL_TGACv1_030309_AA0086320	TRIAE_CS42_1BL_TGACv1_030309_AA0086320.2	High	HD-ZIP
TRIAE_CS42_1AL_TGACv1_001179_AA0026560	TRIAE_CS42_1AL_TGACv1_001179_AA0026560.1	High	HD-ZIP
TRIAE_CS42_1AL_TGACv1_001179_AA0026560	TRIAE_CS42_1AL_TGACv1_001179_AA0026560.3	High	HD-ZIP
TRIAE_CS42_1AL_TGACv1_002906_AA0046200	TRIAE_CS42_1AL_TGACv1_002906_AA0046200.3	High	HD-ZIP
TRIAE_CS42_1AL_TGACv1_002906_AA0046200	TRIAE_CS42_1AL_TGACv1_002906_AA0046200.1	High	HD-ZIP
TRIAE_CS42_1AL_TGACv1_002906_AA0046200	TRIAE_CS42_1AL_TGACv1_002906_AA0046200.2	High	HD-ZIP
TRIAE_CS42_1BL_TGACv1_031710_AA0119420	TRIAE_CS42_1BL_TGACv1_031710_AA0119420.3	High	HD-ZIP
TRIAE_CS42_1BL_TGACv1_031710_AA0119420	TRIAE_CS42_1BL_TGACv1_031710_AA0119420.4	High	HD-ZIP
TRIAE_CS42_1BL_TGACv1_031710_AA0119420	TRIAE_CS42_1BL_TGACv1_031710_AA0119420.1	High	HD-ZIP
TRIAE_CS42_1BL_TGACv1_031710_AA0119420	TRIAE_CS42_1BL_TGACv1_031710_AA0119420.2	High	HD-ZIP
TRIAE_CS42_1BL_TGACv1_030511_AA0092850	TRIAE_CS42_1BL_TGACv1_030511_AA0092850.3	High	HB-PHD
TRIAE_CS42_1BL_TGACv1_030511_AA0092850	TRIAE_CS42_1BL_TGACv1_030511_AA0092850.1	High	HB-PHD
TRIAE_CS42_1BL_TGACv1_030511_AA0092850	TRIAE_CS42_1BL_TGACv1_030511_AA0092850.4	High	HB-PHD
TRIAE_CS42_1BL_TGACv1_030511_AA0092850	TRIAE_CS42_1BL_TGACv1_030511_AA0092850.2	High	HB-PHD
TRIAE_CS42_1AL_TGACv1_000918_AA0021800	TRIAE_CS42_1AL_TGACv1_000918_AA0021800.2	High	HB-PHD
TRIAE_CS42_1AL_TGACv1_000918_AA0021800	TRIAE_CS42_1AL_TGACv1_000918_AA0021800.1	High	HB-PHD
TRIAE_CS42_1AL_TGACv1_001063_AA0024220	TRIAE_CS42_1AL_TGACv1_001063_AA0024220.1	High	C3H
TRIAE_CS42_1AL_TGACv1_001390_AA0029890	TRIAE_CS42_1AL_TGACv1_001390_AA0029890.1	High	C2H2
TRIAE_CS42_1AL_TGACv1_001543_AA0031980	TRIAE_CS42_1AL_TGACv1_001543_AA0031980.1	High	C2H2
TRIAE_CS42_1AL_TGACv1_001548_AA0032040	TRIAE_CS42_1AL_TGACv1_001548_AA0032040.1	High	C3H
TRIAE_CS42_1AL_TGACv1_001552_AA0032170	TRIAE_CS42_1AL_TGACv1_001552_AA0032170.1	High	C2H2
TRIAE_CS42_1AL_TGACv1_001653_AA0033660	TRIAE_CS42_1AL_TGACv1_001653_AA0033660.1	High	C2H2
TRIAE_CS42_1AL_TGACv1_001653_AA0033660	TRIAE_CS42_1AL_TGACv1_001653_AA0033660.2	High	C2H2
TRIAE_CS42_1AL_TGACv1_001653_AA0033660	TRIAE_CS42_1AL_TGACv1_001653_AA0033660.3	High	C2H2
TRIAE_CS42_1AL_TGACv1_002580_AA0043300	TRIAE_CS42_1AL_TGACv1_002580_AA0043300.1	High	C2H2
TRIAE_CS42_1AL_TGACv1_002700_AA0044530	TRIAE_CS42_1AL_TGACv1_002700_AA0044530.1	High	C3H
TRIAE_CS42_1AL_TGACv1_002853_AA0045580	TRIAE_CS42_1AL_TGACv1_002853_AA0045580.1	High	LSD
TRIAE_CS42_1AL_TGACv1_002853_AA0045580	TRIAE_CS42_1AL_TGACv1_002853_AA0045580.2	High	LSD
TRIAE_CS42_1AL_TGACv1_002853_AA0045580	TRIAE_CS42_1AL_TGACv1_002853_AA0045580.3	High	LSD
TRIAE_CS42_1AL_TGACv1_002853_AA0045580	TRIAE_CS42_1AL_TGACv1_002853_AA0045580.4	High	LSD
TRIAE_CS42_1AL_TGACv1_002853_AA0045580	TRIAE_CS42_1AL_TGACv1_002853_AA0045580.5	High	LSD
TRIAE_CS42_1AL_TGACv1_002853_AA0045580	TRIAE_CS42_1AL_TGACv1_002853_AA0045580.6	High	LSD
TRIAE_CS42_1AL_TGACv1_002923_AA0046430	TRIAE_CS42_1AL_TGACv1_002923_AA0046430.1	High	C2H2
TRIAE_CS42_1AL_TGACv1_004697_AA0054040	TRIAE_CS42_1AL_TGACv1_004697_AA0054040.1	High	C2H2
TRIAE_CS42_1AS_TGACv1_019203_AA0063060	TRIAE_CS42_1AS_TGACv1_019203_AA0063060.1	High	C2H2
TRIAE_CS42_1AS_TGACv1_019203_AA0063060	TRIAE_CS42_1AS_TGACv1_019203_AA0063060.2	High	C2H2
TRIAE_CS42_1AS_TGACv1_019472_AA0067080	TRIAE_CS42_1AS_TGACv1_019472_AA0067080.1	High	C2H2
TRIAE_CS42_1AS_TGACv1_019533_AA0067670	TRIAE_CS42_1AS_TGACv1_019533_AA0067670.1	High	C3H
TRIAE_CS42_1AS_TGACv1_019549_AA0067970	TRIAE_CS42_1AS_TGACv1_019549_AA0067970.1	High	C2H2
TRIAE_CS42_1AS_TGACv1_019549_AA0067980	TRIAE_CS42_1AS_TGACv1_019549_AA0067980.1	High	C2H2
TRIAE_CS42_1AS_TGACv1_019557_AA0068240	TRIAE_CS42_1AS_TGACv1_019557_AA0068240.1	High	C2H2
TRIAE_CS42_1AS_TGACv1_019557_AA0068240	TRIAE_CS42_1AS_TGACv1_019557_AA0068240.2	High	C2H2
TRIAE_CS42_1AS_TGACv1_021157_AA0081160	TRIAE_CS42_1AS_TGACv1_021157_AA0081160.1	Low	C2H2
TRIAE_CS42_1BL_TGACv1_030246_AA0083690	TRIAE_CS42_1BL_TGACv1_030246_AA0083690.1	High	C2H2
TRIAE_CS42_1BL_TGACv1_030567_AA0094200	TRIAE_CS42_1BL_TGACv1_030567_AA0094200.1	High	LSD
TRIAE_CS42_1BL_TGACv1_030567_AA0094200	TRIAE_CS42_1BL_TGACv1_030567_AA0094200.2	High	LSD
TRIAE_CS42_1BL_TGACv1_030567_AA0094200	TRIAE_CS42_1BL_TGACv1_030567_AA0094200.3	High	LSD
TRIAE_CS42_1BL_TGACv1_030899_AA0103440	TRIAE_CS42_1BL_TGACv1_030899_AA0103440.1	High	C2H2
TRIAE_CS42_1BL_TGACv1_031095_AA0107510	TRIAE_CS42_1BL_TGACv1_031095_AA0107510.1	High	C2H2
TRIAE_CS42_1BL_TGACv1_032467_AA0130220	TRIAE_CS42_1BL_TGACv1_032467_AA0130220.1	High	C3H
TRIAE_CS42_1BL_TGACv1_032467_AA0130220	TRIAE_CS42_1BL_TGACv1_032467_AA0130220.2	High	C3H
TRIAE_CS42_1BL_TGACv1_032467_AA0130220	TRIAE_CS42_1BL_TGACv1_032467_AA0130220.3	High	C3H
TRIAE_CS42_1BL_TGACv1_032467_AA0130220	TRIAE_CS42_1BL_TGACv1_032467_AA0130220.4	High	C3H
TRIAE_CS42_1BL_TGACv1_032467_AA0130220	TRIAE_CS42_1BL_TGACv1_032467_AA0130220.5	High	C3H
TRIAE_CS42_1BL_TGACv1_032467_AA0130220	TRIAE_CS42_1BL_TGACv1_032467_AA0130220.6	High	C3H
TRIAE_CS42_1BL_TGACv1_032467_AA0130220	TRIAE_CS42_1BL_TGACv1_032467_AA0130220.7	High	C3H
TRIAE_CS42_1BL_TGACv1_032467_AA0130220	TRIAE_CS42_1BL_TGACv1_032467_AA0130220.8	High	C3H
TRIAE_CS42_1BL_TGACv1_032467_AA0130220	TRIAE_CS42_1BL_TGACv1_032467_AA0130220.9	High	C3H
TRIAE_CS42_1BL_TGACv1_032541_AA0131140	TRIAE_CS42_1BL_TGACv1_032541_AA0131140.1	High	C3H
TRIAE_CS42_1BL_TGACv1_032710_AA0133250	TRIAE_CS42_1BL_TGACv1_032710_AA0133250.5	Low	C3H
TRIAE_CS42_1BL_TGACv1_032873_AA0134990	TRIAE_CS42_1BL_TGACv1_032873_AA0134990.1	High	C2H2
TRIAE_CS42_1BL_TGACv1_033686_AA0141330	TRIAE_CS42_1BL_TGACv1_033686_AA0141330.1	High	C2H2
TRIAE_CS42_1BL_TGACv1_034417_AA0144470	TRIAE_CS42_1BL_TGACv1_034417_AA0144470.1	High	C2H2
TRIAE_CS42_1BL_TGACv1_035095_AA0146140	TRIAE_CS42_1BL_TGACv1_035095_AA0146140.1	High	C3H
TRIAE_CS42_1BS_TGACv1_049494_AA0154790	TRIAE_CS42_1BS_TGACv1_049494_AA0154790.1	High	C3H
TRIAE_CS42_1BS_TGACv1_049494_AA0154790	TRIAE_CS42_1BS_TGACv1_049494_AA0154790.2	High	C3H
TRIAE_CS42_1BS_TGACv1_049494_AA0154790	TRIAE_CS42_1BS_TGACv1_049494_AA0154790.3	High	C3H
TRIAE_CS42_1BS_TGACv1_049494_AA0154790	TRIAE_CS42_1BS_TGACv1_049494_AA0154790.4	High	C3H
TRIAE_CS42_1BS_TGACv1_049495_AA0154940	TRIAE_CS42_1BS_TGACv1_049495_AA0154940.1	High	C2H2
TRIAE_CS42_1BS_TGACv1_049968_AA0165020	TRIAE_CS42_1BS_TGACv1_049968_AA0165020.1	High	C2H2
TRIAE_CS42_1BS_TGACv1_050006_AA0165770	TRIAE_CS42_1BS_TGACv1_050006_AA0165770.1	High	C2H2
TRIAE_CS42_1BS_TGACv1_050006_AA0165770	TRIAE_CS42_1BS_TGACv1_050006_AA0165770.2	High	C2H2
TRIAE_CS42_1BS_TGACv1_050050_AA0166560	TRIAE_CS42_1BS_TGACv1_050050_AA0166560.1	High	C2H2
TRIAE_CS42_1BS_TGACv1_050050_AA0166570	TRIAE_CS42_1BS_TGACv1_050050_AA0166570.1	High	C2H2
TRIAE_CS42_1BS_TGACv1_050276_AA0170070	TRIAE_CS42_1BS_TGACv1_050276_AA0170070.1	High	C2H2
TRIAE_CS42_1BS_TGACv1_050483_AA0172630	TRIAE_CS42_1BS_TGACv1_050483_AA0172630.1	High	C3H
TRIAE_CS42_1BS_TGACv1_050483_AA0172630	TRIAE_CS42_1BS_TGACv1_050483_AA0172630.2	High	C3H
TRIAE_CS42_1AL_TGACv1_000300_AA0008320	TRIAE_CS42_1AL_TGACv1_000300_AA0008320.1	High	MYB
TRIAE_CS42_1AL_TGACv1_000728_AA0018030	TRIAE_CS42_1AL_TGACv1_000728_AA0018030.1	High	MYB
TRIAE_CS42_1AL_TGACv1_000772_AA0018880	TRIAE_CS42_1AL_TGACv1_000772_AA0018880.1	High	MYB
TRIAE_CS42_1AL_TGACv1_001166_AA0026380	TRIAE_CS42_1AL_TGACv1_001166_AA0026380.1	High	MYB
TRIAE_CS42_1AL_TGACv1_001166_AA0026380	TRIAE_CS42_1AL_TGACv1_001166_AA0026380.2	High	MYB
TRIAE_CS42_1AL_TGACv1_001455_AA0030810	TRIAE_CS42_1AL_TGACv1_001455_AA0030810.1	High	MYB
TRIAE_CS42_1AL_TGACv1_001498_AA0031420	TRIAE_CS42_1AL_TGACv1_001498_AA0031420.1	High	MYB
TRIAE_CS42_1AL_TGACv1_001846_AA0035800	TRIAE_CS42_1AL_TGACv1_001846_AA0035800.1	High	MYB
TRIAE_CS42_1AL_TGACv1_001915_AA0036630	TRIAE_CS42_1AL_TGACv1_001915_AA0036630.1	High	MYB
TRIAE_CS42_1AL_TGACv1_002296_AA0040640	TRIAE_CS42_1AL_TGACv1_002296_AA0040640.1	High	MYB
TRIAE_CS42_1AL_TGACv1_002296_AA0040650	TRIAE_CS42_1AL_TGACv1_002296_AA0040650.1	High	MYB
TRIAE_CS42_1AL_TGACv1_002296_AA0040660	TRIAE_CS42_1AL_TGACv1_002296_AA0040660.1	High	MYB
TRIAE_CS42_1AL_TGACv1_002859_AA0045630	TRIAE_CS42_1AL_TGACv1_002859_AA0045630.1	High	MYB
TRIAE_CS42_1AL_TGACv1_003266_AA0049020	TRIAE_CS42_1AL_TGACv1_003266_AA0049020.1	Low	MYB
TRIAE_CS42_1AL_TGACv1_003602_AA0050620	TRIAE_CS42_1AL_TGACv1_003602_AA0050620.1	Low	MYB
TRIAE_CS42_1AS_TGACv1_018995_AA0057540	TRIAE_CS42_1AS_TGACv1_018995_AA0057540.1	High	MYB
TRIAE_CS42_1AS_TGACv1_018995_AA0057540	TRIAE_CS42_1AS_TGACv1_018995_AA0057540.2	High	MYB
TRIAE_CS42_1AS_TGACv1_019020_AA0058200	TRIAE_CS42_1AS_TGACv1_019020_AA0058200.1	High	MYB
TRIAE_CS42_1AS_TGACv1_019020_AA0058200	TRIAE_CS42_1AS_TGACv1_019020_AA0058200.3	High	MYB
TRIAE_CS42_1AS_TGACv1_019127_AA0061020	TRIAE_CS42_1AS_TGACv1_019127_AA0061020.1	High	MYB
TRIAE_CS42_1AS_TGACv1_019137_AA0061370	TRIAE_CS42_1AS_TGACv1_019137_AA0061370.1	Low	MYB
TRIAE_CS42_1AS_TGACv1_019507_AA0067450	TRIAE_CS42_1AS_TGACv1_019507_AA0067450.1	High	MYB
TRIAE_CS42_1AS_TGACv1_019548_AA0067960	TRIAE_CS42_1AS_TGACv1_019548_AA0067960.1	High	MYB
TRIAE_CS42_1AS_TGACv1_020216_AA0075730	TRIAE_CS42_1AS_TGACv1_020216_AA0075730.1	High	MYB
TRIAE_CS42_1AS_TGACv1_020216_AA0075730	TRIAE_CS42_1AS_TGACv1_020216_AA0075730.2	High	MYB
TRIAE_CS42_1BL_TGACv1_030254_AA0084030	TRIAE_CS42_1BL_TGACv1_030254_AA0084030.1	High	MYB
TRIAE_CS42_1BL_TGACv1_030534_AA0093380	TRIAE_CS42_1BL_TGACv1_030534_AA0093380.1	High	MYB
TRIAE_CS42_1BL_TGACv1_030624_AA0096110	TRIAE_CS42_1BL_TGACv1_030624_AA0096110.1	High	MYB
TRIAE_CS42_1BL_TGACv1_030624_AA0096170	TRIAE_CS42_1BL_TGACv1_030624_AA0096170.1	High	MYB
TRIAE_CS42_1BL_TGACv1_030624_AA0096180	TRIAE_CS42_1BL_TGACv1_030624_AA0096180.1	High	MYB
TRIAE_CS42_1BL_TGACv1_030624_AA0096180	TRIAE_CS42_1BL_TGACv1_030624_AA0096180.2	High	MYB
TRIAE_CS42_1BL_TGACv1_030908_AA0103520	TRIAE_CS42_1BL_TGACv1_030908_AA0103520.1	High	MYB
TRIAE_CS42_1BL_TGACv1_030908_AA0103520	TRIAE_CS42_1BL_TGACv1_030908_AA0103520.2	High	MYB
TRIAE_CS42_1BL_TGACv1_030950_AA0104230	TRIAE_CS42_1BL_TGACv1_030950_AA0104230.1	High	MYB
TRIAE_CS42_1BL_TGACv1_031145_AA0108580	TRIAE_CS42_1BL_TGACv1_031145_AA0108580.1	Low	MYB
TRIAE_CS42_1BL_TGACv1_031390_AA0112990	TRIAE_CS42_1BL_TGACv1_031390_AA0112990.1	High	MYB
TRIAE_CS42_1BL_TGACv1_031611_AA0117150	TRIAE_CS42_1BL_TGACv1_031611_AA0117150.1	High	MYB
TRIAE_CS42_1BL_TGACv1_032297_AA0128130	TRIAE_CS42_1BL_TGACv1_032297_AA0128130.1	High	MYB
TRIAE_CS42_1BL_TGACv1_032297_AA0128130	TRIAE_CS42_1BL_TGACv1_032297_AA0128130.2	High	MYB
TRIAE_CS42_1BL_TGACv1_033044_AA0136400	TRIAE_CS42_1BL_TGACv1_033044_AA0136400.1	High	MYB
TRIAE_CS42_1BL_TGACv1_034167_AA0143710	TRIAE_CS42_1BL_TGACv1_034167_AA0143710.1	Low	MYB
TRIAE_CS42_1BS_TGACv1_049443_AA0153870	TRIAE_CS42_1BS_TGACv1_049443_AA0153870.1	High	MYB
TRIAE_CS42_1BS_TGACv1_049443_AA0153870	TRIAE_CS42_1BS_TGACv1_049443_AA0153870.2	Low	MYB
TRIAE_CS42_1BS_TGACv1_049477_AA0154510	TRIAE_CS42_1BS_TGACv1_049477_AA0154510.1	High	MYB
TRIAE_CS42_1BS_TGACv1_049559_AA0156860	TRIAE_CS42_1BS_TGACv1_049559_AA0156860.1	Low	MYB
TRIAE_CS42_1BS_TGACv1_049570_AA0157070	TRIAE_CS42_1BS_TGACv1_049570_AA0157070.1	High	MYB
TRIAE_CS42_1BS_TGACv1_049635_AA0158560	TRIAE_CS42_1BS_TGACv1_049635_AA0158560.2	High	MYB
TRIAE_CS42_1BS_TGACv1_049901_AA0163860	TRIAE_CS42_1BS_TGACv1_049901_AA0163860.1	High	MYB
TRIAE_CS42_1BS_TGACv1_050208_AA0169050	TRIAE_CS42_1BS_TGACv1_050208_AA0169050.1	High	MYB
TRIAE_CS42_1BS_TGACv1_050233_AA0169320	TRIAE_CS42_1BS_TGACv1_050233_AA0169320.1	High	MYB
TRIAE_CS42_1BS_TGACv1_050660_AA0174300	TRIAE_CS42_1BS_TGACv1_050660_AA0174300.1	High	MYB
TRIAE_CS42_1AL_TGACv1_000014_AA0000420	TRIAE_CS42_1AL_TGACv1_000014_AA0000420.1	High	MYB_related
TRIAE_CS42_1AL_TGACv1_000072_AA0002310	TRIAE_CS42_1AL_TGACv1_000072_AA0002310.1	High	MYB_related
TRIAE_CS42_1AL_TGACv1_000072_AA0002310	TRIAE_CS42_1AL_TGACv1_000072_AA0002310.2	High	MYB_related
TRIAE_CS42_1AL_TGACv1_000072_AA0002320	TRIAE_CS42_1AL_TGACv1_000072_AA0002320.1	Low	MYB_related
TRIAE_CS42_1AL_TGACv1_000072_AA0002340	TRIAE_CS42_1AL_TGACv1_000072_AA0002340.1	High	MYB_related
TRIAE_CS42_1AL_TGACv1_000072_AA0002350	TRIAE_CS42_1AL_TGACv1_000072_AA0002350.1	High	MYB_related
TRIAE_CS42_1AL_TGACv1_000072_AA0002360	TRIAE_CS42_1AL_TGACv1_000072_AA0002360.1	High	MYB_related
TRIAE_CS42_1AL_TGACv1_000115_AA0003870	TRIAE_CS42_1AL_TGACv1_000115_AA0003870.1	High	MYB_related
TRIAE_CS42_1AL_TGACv1_000164_AA0005140	TRIAE_CS42_1AL_TGACv1_000164_AA0005140.1	High	MYB_related
TRIAE_CS42_1AL_TGACv1_000223_AA0006640	TRIAE_CS42_1AL_TGACv1_000223_AA0006640.2	High	MYB_related
TRIAE_CS42_1AL_TGACv1_000223_AA0006640	TRIAE_CS42_1AL_TGACv1_000223_AA0006640.3	High	MYB_related
TRIAE_CS42_1AL_TGACv1_000223_AA0006640	TRIAE_CS42_1AL_TGACv1_000223_AA0006640.4	High	MYB_related
TRIAE_CS42_1AL_TGACv1_000223_AA0006640	TRIAE_CS42_1AL_TGACv1_000223_AA0006640.5	High	MYB_related
TRIAE_CS42_1AL_TGACv1_000567_AA0014780	TRIAE_CS42_1AL_TGACv1_000567_AA0014780.1	High	MYB_related
TRIAE_CS42_1AL_TGACv1_000567_AA0014780	TRIAE_CS42_1AL_TGACv1_000567_AA0014780.2	High	MYB_related
TRIAE_CS42_1AL_TGACv1_000583_AA0015240	TRIAE_CS42_1AL_TGACv1_000583_AA0015240.1	High	MYB_related
TRIAE_CS42_1AL_TGACv1_000680_AA0016920	TRIAE_CS42_1AL_TGACv1_000680_AA0016920.1	High	MYB_related
TRIAE_CS42_1AL_TGACv1_000868_AA0020680	TRIAE_CS42_1AL_TGACv1_000868_AA0020680.1	High	MYB_related
TRIAE_CS42_1AL_TGACv1_001818_AA0035580	TRIAE_CS42_1AL_TGACv1_001818_AA0035580.1	High	MYB_related
TRIAE_CS42_1AL_TGACv1_001818_AA0035590	TRIAE_CS42_1AL_TGACv1_001818_AA0035590.1	High	MYB_related
TRIAE_CS42_1AL_TGACv1_002859_AA0045630	TRIAE_CS42_1AL_TGACv1_002859_AA0045630.2	High	MYB_related
TRIAE_CS42_1AL_TGACv1_003058_AA0047350	TRIAE_CS42_1AL_TGACv1_003058_AA0047350.1	High	MYB_related
TRIAE_CS42_1AS_TGACv1_019020_AA0058200	TRIAE_CS42_1AS_TGACv1_019020_AA0058200.2	High	MYB_related
TRIAE_CS42_1AS_TGACv1_019295_AA0064470	TRIAE_CS42_1AS_TGACv1_019295_AA0064470.1	High	MYB_related
TRIAE_CS42_1AS_TGACv1_019468_AA0067030	TRIAE_CS42_1AS_TGACv1_019468_AA0067030.1	Low	MYB_related
TRIAE_CS42_1BL_TGACv1_030573_AA0094490	TRIAE_CS42_1BL_TGACv1_030573_AA0094490.1	High	MYB_related
TRIAE_CS42_1BL_TGACv1_030573_AA0094500	TRIAE_CS42_1BL_TGACv1_030573_AA0094500.1	High	MYB_related
TRIAE_CS42_1BL_TGACv1_030573_AA0094500	TRIAE_CS42_1BL_TGACv1_030573_AA0094500.2	High	MYB_related
TRIAE_CS42_1BL_TGACv1_030573_AA0094530	TRIAE_CS42_1BL_TGACv1_030573_AA0094530.1	High	MYB_related
TRIAE_CS42_1BL_TGACv1_030573_AA0094540	TRIAE_CS42_1BL_TGACv1_030573_AA0094540.1	High	MYB_related
TRIAE_CS42_1BL_TGACv1_030598_AA0095250	TRIAE_CS42_1BL_TGACv1_030598_AA0095250.1	High	MYB_related
TRIAE_CS42_1BL_TGACv1_030908_AA0103520	TRIAE_CS42_1BL_TGACv1_030908_AA0103520.3	High	MYB_related
TRIAE_CS42_1BL_TGACv1_031140_AA0108490	TRIAE_CS42_1BL_TGACv1_031140_AA0108490.1	High	MYB_related
TRIAE_CS42_1BL_TGACv1_031140_AA0108490	TRIAE_CS42_1BL_TGACv1_031140_AA0108490.2	High	MYB_related
TRIAE_CS42_1BL_TGACv1_031140_AA0108510	TRIAE_CS42_1BL_TGACv1_031140_AA0108510.1	High	MYB_related
TRIAE_CS42_1BL_TGACv1_031140_AA0108520	TRIAE_CS42_1BL_TGACv1_031140_AA0108520.1	High	MYB_related
TRIAE_CS42_1BL_TGACv1_031394_AA0113140	TRIAE_CS42_1BL_TGACv1_031394_AA0113140.1	High	MYB_related
TRIAE_CS42_1BL_TGACv1_031394_AA0113140	TRIAE_CS42_1BL_TGACv1_031394_AA0113140.2	High	MYB_related
TRIAE_CS42_1BL_TGACv1_031394_AA0113140	TRIAE_CS42_1BL_TGACv1_031394_AA0113140.3	High	MYB_related
TRIAE_CS42_1BL_TGACv1_031415_AA0113560	TRIAE_CS42_1BL_TGACv1_031415_AA0113560.1	High	MYB_related
TRIAE_CS42_1BL_TGACv1_031415_AA0113560	TRIAE_CS42_1BL_TGACv1_031415_AA0113560.2	High	MYB_related
TRIAE_CS42_1BL_TGACv1_031415_AA0113560	TRIAE_CS42_1BL_TGACv1_031415_AA0113560.3	High	MYB_related
TRIAE_CS42_1BL_TGACv1_031472_AA0114750	TRIAE_CS42_1BL_TGACv1_031472_AA0114750.1	High	MYB_related
TRIAE_CS42_1BL_TGACv1_031472_AA0114760	TRIAE_CS42_1BL_TGACv1_031472_AA0114760.1	High	MYB_related
TRIAE_CS42_1BL_TGACv1_031472_AA0114770	TRIAE_CS42_1BL_TGACv1_031472_AA0114770.1	High	MYB_related
TRIAE_CS42_1BL_TGACv1_032060_AA0124880	TRIAE_CS42_1BL_TGACv1_032060_AA0124880.1	High	MYB_related
TRIAE_CS42_1BL_TGACv1_032225_AA0127040	TRIAE_CS42_1BL_TGACv1_032225_AA0127040.1	High	MYB_related
TRIAE_CS42_1BL_TGACv1_032225_AA0127040	TRIAE_CS42_1BL_TGACv1_032225_AA0127040.2	High	MYB_related
TRIAE_CS42_1BL_TGACv1_032225_AA0127040	TRIAE_CS42_1BL_TGACv1_032225_AA0127040.3	High	MYB_related
TRIAE_CS42_1BL_TGACv1_032362_AA0128920	TRIAE_CS42_1BL_TGACv1_032362_AA0128920.1	High	MYB_related
TRIAE_CS42_1BL_TGACv1_032362_AA0128920	TRIAE_CS42_1BL_TGACv1_032362_AA0128920.2	High	MYB_related
TRIAE_CS42_1BL_TGACv1_032447_AA0129970	TRIAE_CS42_1BL_TGACv1_032447_AA0129970.1	High	MYB_related
TRIAE_CS42_1BL_TGACv1_033617_AA0140650	TRIAE_CS42_1BL_TGACv1_033617_AA0140650.1	High	MYB_related
TRIAE_CS42_1BL_TGACv1_034205_AA0143770	TRIAE_CS42_1BL_TGACv1_034205_AA0143770.1	High	MYB_related
TRIAE_CS42_1BS_TGACv1_049372_AA0151030	TRIAE_CS42_1BS_TGACv1_049372_AA0151030.1	Low	MYB_related
TRIAE_CS42_1BS_TGACv1_049398_AA0152150	TRIAE_CS42_1BS_TGACv1_049398_AA0152150.1	Low	MYB_related
TRIAE_CS42_1BS_TGACv1_049491_AA0154730	TRIAE_CS42_1BS_TGACv1_049491_AA0154730.1	High	MYB_related
TRIAE_CS42_1BS_TGACv1_049491_AA0154730	TRIAE_CS42_1BS_TGACv1_049491_AA0154730.2	High	MYB_related
TRIAE_CS42_1BS_TGACv1_049491_AA0154730	TRIAE_CS42_1BS_TGACv1_049491_AA0154730.3	High	MYB_related
TRIAE_CS42_1BS_TGACv1_049635_AA0158560	TRIAE_CS42_1BS_TGACv1_049635_AA0158560.1	High	MYB_related
TRIAE_CS42_1BS_TGACv1_049635_AA0158560	TRIAE_CS42_1BS_TGACv1_049635_AA0158560.3	High	MYB_related
TRIAE_CS42_1BS_TGACv1_050237_AA0169430	TRIAE_CS42_1BS_TGACv1_050237_AA0169430.1	High	MYB_related
TRIAE_CS42_1BS_TGACv1_050237_AA0169430	TRIAE_CS42_1BS_TGACv1_050237_AA0169430.2	High	MYB_related
TRIAE_CS42_1BS_TGACv1_050795_AA0175590	TRIAE_CS42_1BS_TGACv1_050795_AA0175590.1	High	MYB_related
TRIAE_CS42_1BS_TGACv1_050795_AA0175600	TRIAE_CS42_1BS_TGACv1_050795_AA0175600.1	High	MYB_related
TRIAE_CS42_1BS_TGACv1_051134_AA0178010	TRIAE_CS42_1BS_TGACv1_051134_AA0178010.1	Low	MYB_related
TRIAE_CS42_1BS_TGACv1_051134_AA0178020	TRIAE_CS42_1BS_TGACv1_051134_AA0178020.1	High	MYB_related
TRIAE_CS42_6BL_TGACv1_499437_AA1582540	TRIAE_CS42_6BL_TGACv1_499437_AA1582540.1	High	bHLH
TRIAE_CS42_6BL_TGACv1_499497_AA1584310	TRIAE_CS42_6BL_TGACv1_499497_AA1584310.1	Low	bHLH
TRIAE_CS42_6BL_TGACv1_499547_AA1585610	TRIAE_CS42_6BL_TGACv1_499547_AA1585610.1	High	Nin-like
TRIAE_CS42_6BL_TGACv1_499552_AA1585830	TRIAE_CS42_6BL_TGACv1_499552_AA1585830.1	High	BES1
TRIAE_CS42_6BL_TGACv1_499553_AA1585860	TRIAE_CS42_6BL_TGACv1_499553_AA1585860.1	High	Dof
TRIAE_CS42_6BL_TGACv1_499553_AA1585860	TRIAE_CS42_6BL_TGACv1_499553_AA1585860.2	High	Dof
TRIAE_CS42_6BL_TGACv1_499553_AA1585860	TRIAE_CS42_6BL_TGACv1_499553_AA1585860.3	High	Dof
TRIAE_CS42_6BL_TGACv1_499553_AA1585860	TRIAE_CS42_6BL_TGACv1_499553_AA1585860.4	High	Dof
TRIAE_CS42_6BL_TGACv1_499609_AA1587290	TRIAE_CS42_6BL_TGACv1_499609_AA1587290.1	High	bHLH
TRIAE_CS42_6BL_TGACv1_499648_AA1588220	TRIAE_CS42_6BL_TGACv1_499648_AA1588220.1	Low	FAR1
TRIAE_CS42_6BL_TGACv1_499718_AA1589950	TRIAE_CS42_6BL_TGACv1_499718_AA1589950.1	High	NF-YB
TRIAE_CS42_6BL_TGACv1_499718_AA1589960	TRIAE_CS42_6BL_TGACv1_499718_AA1589960.1	High	NF-YB
TRIAE_CS42_6BL_TGACv1_499720_AA1589990	TRIAE_CS42_6BL_TGACv1_499720_AA1589990.1	High	FAR1
TRIAE_CS42_6BL_TGACv1_499743_AA1590770	TRIAE_CS42_6BL_TGACv1_499743_AA1590770.1	Low	FAR1
TRIAE_CS42_6BL_TGACv1_499794_AA1591850	TRIAE_CS42_6BL_TGACv1_499794_AA1591850.1	High	YABBY
TRIAE_CS42_6BL_TGACv1_499794_AA1591850	TRIAE_CS42_6BL_TGACv1_499794_AA1591850.2	High	YABBY
TRIAE_CS42_6BL_TGACv1_499809_AA1592220	TRIAE_CS42_6BL_TGACv1_499809_AA1592220.1	High	bHLH
TRIAE_CS42_6BL_TGACv1_499825_AA1592560	TRIAE_CS42_6BL_TGACv1_499825_AA1592560.1	Low	FAR1
TRIAE_CS42_6BL_TGACv1_499830_AA1592660	TRIAE_CS42_6BL_TGACv1_499830_AA1592660.1	High	NF-YA
TRIAE_CS42_6BL_TGACv1_499850_AA1593200	TRIAE_CS42_6BL_TGACv1_499850_AA1593200.1	Low	NAC
TRIAE_CS42_6BL_TGACv1_499850_AA1593230	TRIAE_CS42_6BL_TGACv1_499850_AA1593230.1	High	NAC
TRIAE_CS42_6BL_TGACv1_499870_AA1593630	TRIAE_CS42_6BL_TGACv1_499870_AA1593630.1	Low	FAR1
TRIAE_CS42_6BL_TGACv1_499898_AA1594150	TRIAE_CS42_6BL_TGACv1_499898_AA1594150.1	High	Dof
TRIAE_CS42_6BL_TGACv1_499956_AA1595880	TRIAE_CS42_6BL_TGACv1_499956_AA1595880.1	High	Trihelix
TRIAE_CS42_6BL_TGACv1_499996_AA1596870	TRIAE_CS42_6BL_TGACv1_499996_AA1596870.1	High	TCP
TRIAE_CS42_6BL_TGACv1_500041_AA1597810	TRIAE_CS42_6BL_TGACv1_500041_AA1597810.1	High	WRKY
TRIAE_CS42_6BL_TGACv1_500113_AA1599320	TRIAE_CS42_6BL_TGACv1_500113_AA1599320.1	High	bHLH
TRIAE_CS42_6BL_TGACv1_500113_AA1599320	TRIAE_CS42_6BL_TGACv1_500113_AA1599320.2	High	bHLH
TRIAE_CS42_6BL_TGACv1_500113_AA1599320	TRIAE_CS42_6BL_TGACv1_500113_AA1599320.3	High	bHLH
TRIAE_CS42_6BL_TGACv1_500113_AA1599320	TRIAE_CS42_6BL_TGACv1_500113_AA1599320.4	High	bHLH
TRIAE_CS42_6BL_TGACv1_500113_AA1599320	TRIAE_CS42_6BL_TGACv1_500113_AA1599320.5	High	bHLH
TRIAE_CS42_6BL_TGACv1_500154_AA1600150	TRIAE_CS42_6BL_TGACv1_500154_AA1600150.1	Low	Nin-like
TRIAE_CS42_6BL_TGACv1_500168_AA1600460	TRIAE_CS42_6BL_TGACv1_500168_AA1600460.1	High	NAC
TRIAE_CS42_6BL_TGACv1_500224_AA1601590	TRIAE_CS42_6BL_TGACv1_500224_AA1601590.1	High	NAC
TRIAE_CS42_6BL_TGACv1_500224_AA1601590	TRIAE_CS42_6BL_TGACv1_500224_AA1601590.2	High	NAC
TRIAE_CS42_6BL_TGACv1_500224_AA1601590	TRIAE_CS42_6BL_TGACv1_500224_AA1601590.3	High	NAC
TRIAE_CS42_6BL_TGACv1_500224_AA1601590	TRIAE_CS42_6BL_TGACv1_500224_AA1601590.4	High	NAC
TRIAE_CS42_6BL_TGACv1_500252_AA1602130	TRIAE_CS42_6BL_TGACv1_500252_AA1602130.1	High	bHLH
TRIAE_CS42_6BL_TGACv1_500272_AA1602530	TRIAE_CS42_6BL_TGACv1_500272_AA1602530.1	Low	FAR1
TRIAE_CS42_6BL_TGACv1_500317_AA1603110	TRIAE_CS42_6BL_TGACv1_500317_AA1603110.1	High	bZIP
TRIAE_CS42_6BL_TGACv1_500334_AA1603300	TRIAE_CS42_6BL_TGACv1_500334_AA1603300.1	High	GATA
TRIAE_CS42_6BL_TGACv1_500334_AA1603300	TRIAE_CS42_6BL_TGACv1_500334_AA1603300.2	High	GATA
TRIAE_CS42_6BL_TGACv1_500403_AA1604110	TRIAE_CS42_6BL_TGACv1_500403_AA1604110.1	Low	GATA
TRIAE_CS42_6BL_TGACv1_500431_AA1604420	TRIAE_CS42_6BL_TGACv1_500431_AA1604420.1	High	NAC
TRIAE_CS42_6BL_TGACv1_500431_AA1604420	TRIAE_CS42_6BL_TGACv1_500431_AA1604420.2	High	NAC
TRIAE_CS42_6BL_TGACv1_500437_AA1604630	TRIAE_CS42_6BL_TGACv1_500437_AA1604630.1	High	LBD
TRIAE_CS42_6BL_TGACv1_500462_AA1605080	TRIAE_CS42_6BL_TGACv1_500462_AA1605080.1	High	bHLH
TRIAE_CS42_6BL_TGACv1_500490_AA1605420	TRIAE_CS42_6BL_TGACv1_500490_AA1605420.1	Low	FAR1
TRIAE_CS42_6BL_TGACv1_500492_AA1605440	TRIAE_CS42_6BL_TGACv1_500492_AA1605440.1	Low	FAR1
TRIAE_CS42_6BL_TGACv1_500512_AA1605730	TRIAE_CS42_6BL_TGACv1_500512_AA1605730.1	High	FAR1
TRIAE_CS42_6BL_TGACv1_500543_AA1606120	TRIAE_CS42_6BL_TGACv1_500543_AA1606120.1	High	bHLH
TRIAE_CS42_6BL_TGACv1_500543_AA1606120	TRIAE_CS42_6BL_TGACv1_500543_AA1606120.2	High	bHLH
TRIAE_CS42_6BL_TGACv1_500589_AA1606780	TRIAE_CS42_6BL_TGACv1_500589_AA1606780.1	High	NAC
TRIAE_CS42_6BL_TGACv1_500614_AA1607180	TRIAE_CS42_6BL_TGACv1_500614_AA1607180.1	High	E2F/DP
TRIAE_CS42_6BL_TGACv1_500614_AA1607180	TRIAE_CS42_6BL_TGACv1_500614_AA1607180.2	High	E2F/DP
TRIAE_CS42_6BL_TGACv1_500631_AA1607660	TRIAE_CS42_6BL_TGACv1_500631_AA1607660.1	High	EIL
TRIAE_CS42_6BL_TGACv1_500734_AA1609050	TRIAE_CS42_6BL_TGACv1_500734_AA1609050.1	High	FAR1
TRIAE_CS42_6BL_TGACv1_500741_AA1609130	TRIAE_CS42_6BL_TGACv1_500741_AA1609130.1	High	NF-YB
TRIAE_CS42_6BL_TGACv1_500802_AA1609860	TRIAE_CS42_6BL_TGACv1_500802_AA1609860.1	High	ZF-HD
TRIAE_CS42_6BL_TGACv1_500802_AA1609860	TRIAE_CS42_6BL_TGACv1_500802_AA1609860.2	High	ZF-HD
TRIAE_CS42_6BL_TGACv1_500823_AA1610290	TRIAE_CS42_6BL_TGACv1_500823_AA1610290.1	Low	E2F/DP
TRIAE_CS42_6BL_TGACv1_500895_AA1611410	TRIAE_CS42_6BL_TGACv1_500895_AA1611410.1	High	NAC
TRIAE_CS42_6BL_TGACv1_500895_AA1611420	TRIAE_CS42_6BL_TGACv1_500895_AA1611420.1	High	NAC
TRIAE_CS42_6BL_TGACv1_500899_AA1611470	TRIAE_CS42_6BL_TGACv1_500899_AA1611470.1	High	bZIP
TRIAE_CS42_6BL_TGACv1_500899_AA1611470	TRIAE_CS42_6BL_TGACv1_500899_AA1611470.2	High	bZIP
TRIAE_CS42_6BL_TGACv1_500901_AA1611480	TRIAE_CS42_6BL_TGACv1_500901_AA1611480.1	Low	FAR1
TRIAE_CS42_6BL_TGACv1_501000_AA1612470	TRIAE_CS42_6BL_TGACv1_501000_AA1612470.1	High	FAR1
TRIAE_CS42_6BL_TGACv1_501000_AA1612470	TRIAE_CS42_6BL_TGACv1_501000_AA1612470.2	High	FAR1
TRIAE_CS42_6BL_TGACv1_501060_AA1613040	TRIAE_CS42_6BL_TGACv1_501060_AA1613040.1	High	bHLH
TRIAE_CS42_6BL_TGACv1_501113_AA1613700	TRIAE_CS42_6BL_TGACv1_501113_AA1613700.1	High	TCP
TRIAE_CS42_6BL_TGACv1_501225_AA1615050	TRIAE_CS42_6BL_TGACv1_501225_AA1615050.1	High	NAC
TRIAE_CS42_6BL_TGACv1_501225_AA1615050	TRIAE_CS42_6BL_TGACv1_501225_AA1615050.2	High	NAC
TRIAE_CS42_6BL_TGACv1_501315_AA1615930	TRIAE_CS42_6BL_TGACv1_501315_AA1615930.1	High	GeBP
TRIAE_CS42_6BL_TGACv1_501315_AA1615930	TRIAE_CS42_6BL_TGACv1_501315_AA1615930.2	High	GeBP
TRIAE_CS42_6BL_TGACv1_501396_AA1616990	TRIAE_CS42_6BL_TGACv1_501396_AA1616990.1	Low	FAR1
TRIAE_CS42_6BL_TGACv1_501414_AA1617190	TRIAE_CS42_6BL_TGACv1_501414_AA1617190.1	High	FAR1
TRIAE_CS42_6BL_TGACv1_501458_AA1617710	TRIAE_CS42_6BL_TGACv1_501458_AA1617710.1	High	GeBP
TRIAE_CS42_6BL_TGACv1_501458_AA1617710	TRIAE_CS42_6BL_TGACv1_501458_AA1617710.2	High	GeBP
TRIAE_CS42_6BL_TGACv1_501502_AA1618240	TRIAE_CS42_6BL_TGACv1_501502_AA1618240.1	High	WRKY
TRIAE_CS42_6BL_TGACv1_501529_AA1618440	TRIAE_CS42_6BL_TGACv1_501529_AA1618440.1	High	bHLH
TRIAE_CS42_6BL_TGACv1_501580_AA1619070	TRIAE_CS42_6BL_TGACv1_501580_AA1619070.1	High	NAC
TRIAE_CS42_6BL_TGACv1_501598_AA1619180	TRIAE_CS42_6BL_TGACv1_501598_AA1619180.1	High	NAC
TRIAE_CS42_6BL_TGACv1_501749_AA1620400	TRIAE_CS42_6BL_TGACv1_501749_AA1620400.1	Low	FAR1
TRIAE_CS42_6BL_TGACv1_501882_AA1621260	TRIAE_CS42_6BL_TGACv1_501882_AA1621260.1	High	bHLH
TRIAE_CS42_6BL_TGACv1_502036_AA1622550	TRIAE_CS42_6BL_TGACv1_502036_AA1622550.1	Low	FAR1
TRIAE_CS42_6BL_TGACv1_502078_AA1622880	TRIAE_CS42_6BL_TGACv1_502078_AA1622880.1	High	NAC
TRIAE_CS42_6BL_TGACv1_502324_AA1624270	TRIAE_CS42_6BL_TGACv1_502324_AA1624270.1	Low	GRAS
TRIAE_CS42_6BL_TGACv1_502334_AA1624310	TRIAE_CS42_6BL_TGACv1_502334_AA1624310.1	High	WRKY
TRIAE_CS42_6BL_TGACv1_503188_AA1627440	TRIAE_CS42_6BL_TGACv1_503188_AA1627440.1	High	TCP
TRIAE_CS42_6BL_TGACv1_504227_AA1628750	TRIAE_CS42_6BL_TGACv1_504227_AA1628750.1	Low	FAR1
TRIAE_CS42_6BL_TGACv1_504227_AA1628750	TRIAE_CS42_6BL_TGACv1_504227_AA1628750.2	Low	FAR1
TRIAE_CS42_6BL_TGACv1_509945_AA1629820	TRIAE_CS42_6BL_TGACv1_509945_AA1629820.1	Low	FAR1
TRIAE_CS42_6BS_TGACv1_513137_AA1631540	TRIAE_CS42_6BS_TGACv1_513137_AA1631540.1	High	FAR1
TRIAE_CS42_6BS_TGACv1_513154_AA1632180	TRIAE_CS42_6BS_TGACv1_513154_AA1632180.1	Low	FAR1
TRIAE_CS42_6BS_TGACv1_513180_AA1633130	TRIAE_CS42_6BS_TGACv1_513180_AA1633130.1	High	SBP
TRIAE_CS42_6BS_TGACv1_513257_AA1636370	TRIAE_CS42_6BS_TGACv1_513257_AA1636370.1	High	NAC
TRIAE_CS42_6BS_TGACv1_513283_AA1637170	TRIAE_CS42_6BS_TGACv1_513283_AA1637170.1	High	bHLH
TRIAE_CS42_6BS_TGACv1_513324_AA1638290	TRIAE_CS42_6BS_TGACv1_513324_AA1638290.1	High	bZIP
TRIAE_CS42_6BS_TGACv1_513324_AA1638290	TRIAE_CS42_6BS_TGACv1_513324_AA1638290.2	High	bZIP
TRIAE_CS42_6BS_TGACv1_513324_AA1638290	TRIAE_CS42_6BS_TGACv1_513324_AA1638290.3	High	bZIP
TRIAE_CS42_6BS_TGACv1_513342_AA1638620	TRIAE_CS42_6BS_TGACv1_513342_AA1638620.1	High	LBD
TRIAE_CS42_6BS_TGACv1_513373_AA1639310	TRIAE_CS42_6BS_TGACv1_513373_AA1639310.1	High	bZIP
TRIAE_CS42_6BS_TGACv1_513423_AA1641170	TRIAE_CS42_6BS_TGACv1_513423_AA1641170.1	High	bZIP
TRIAE_CS42_6BS_TGACv1_513450_AA1642020	TRIAE_CS42_6BS_TGACv1_513450_AA1642020.1	Low	FAR1
TRIAE_CS42_6BS_TGACv1_513502_AA1643690	TRIAE_CS42_6BS_TGACv1_513502_AA1643690.1	High	WRKY
TRIAE_CS42_6BS_TGACv1_513502_AA1643690	TRIAE_CS42_6BS_TGACv1_513502_AA1643690.2	High	WRKY
TRIAE_CS42_6BS_TGACv1_513579_AA1645090	TRIAE_CS42_6BS_TGACv1_513579_AA1645090.1	High	GATA
TRIAE_CS42_6BS_TGACv1_513579_AA1645090	TRIAE_CS42_6BS_TGACv1_513579_AA1645090.2	High	GATA
TRIAE_CS42_6BS_TGACv1_513598_AA1645640	TRIAE_CS42_6BS_TGACv1_513598_AA1645640.1	High	SBP
TRIAE_CS42_6BS_TGACv1_513632_AA1646200	TRIAE_CS42_6BS_TGACv1_513632_AA1646200.1	High	GATA
TRIAE_CS42_6BS_TGACv1_513632_AA1646200	TRIAE_CS42_6BS_TGACv1_513632_AA1646200.2	High	GATA
TRIAE_CS42_6BS_TGACv1_513814_AA1650250	TRIAE_CS42_6BS_TGACv1_513814_AA1650250.1	Low	FAR1
TRIAE_CS42_6BS_TGACv1_513816_AA1650270	TRIAE_CS42_6BS_TGACv1_513816_AA1650270.1	High	HSF
TRIAE_CS42_6BS_TGACv1_513817_AA1650280	TRIAE_CS42_6BS_TGACv1_513817_AA1650280.1	Low	bHLH
TRIAE_CS42_6BS_TGACv1_513898_AA1651650	TRIAE_CS42_6BS_TGACv1_513898_AA1651650.1	High	NAC
TRIAE_CS42_6BS_TGACv1_514107_AA1655320	TRIAE_CS42_6BS_TGACv1_514107_AA1655320.1	High	GRAS
TRIAE_CS42_6BS_TGACv1_514107_AA1655320	TRIAE_CS42_6BS_TGACv1_514107_AA1655320.2	High	GRAS
TRIAE_CS42_6BS_TGACv1_514166_AA1656250	TRIAE_CS42_6BS_TGACv1_514166_AA1656250.1	High	SBP
TRIAE_CS42_6BS_TGACv1_514166_AA1656250	TRIAE_CS42_6BS_TGACv1_514166_AA1656250.2	High	SBP
TRIAE_CS42_6BS_TGACv1_514166_AA1656250	TRIAE_CS42_6BS_TGACv1_514166_AA1656250.3	High	SBP
TRIAE_CS42_6BS_TGACv1_514166_AA1656250	TRIAE_CS42_6BS_TGACv1_514166_AA1656250.4	High	SBP
TRIAE_CS42_6BS_TGACv1_514166_AA1656250	TRIAE_CS42_6BS_TGACv1_514166_AA1656250.5	High	SBP
TRIAE_CS42_6BS_TGACv1_514213_AA1657070	TRIAE_CS42_6BS_TGACv1_514213_AA1657070.1	High	Trihelix
TRIAE_CS42_6BS_TGACv1_514213_AA1657070	TRIAE_CS42_6BS_TGACv1_514213_AA1657070.2	High	Trihelix
TRIAE_CS42_6BS_TGACv1_514225_AA1657230	TRIAE_CS42_6BS_TGACv1_514225_AA1657230.1	High	NF-YC
TRIAE_CS42_6BS_TGACv1_514225_AA1657230	TRIAE_CS42_6BS_TGACv1_514225_AA1657230.2	High	NF-YC
TRIAE_CS42_6BS_TGACv1_514225_AA1657230	TRIAE_CS42_6BS_TGACv1_514225_AA1657230.3	High	NF-YC
TRIAE_CS42_6BS_TGACv1_514351_AA1658680	TRIAE_CS42_6BS_TGACv1_514351_AA1658680.1	High	bZIP
TRIAE_CS42_6BS_TGACv1_514357_AA1658760	TRIAE_CS42_6BS_TGACv1_514357_AA1658760.1	High	Trihelix
TRIAE_CS42_6BS_TGACv1_514357_AA1658760	TRIAE_CS42_6BS_TGACv1_514357_AA1658760.2	High	Trihelix
TRIAE_CS42_6BS_TGACv1_514379_AA1659010	TRIAE_CS42_6BS_TGACv1_514379_AA1659010.1	High	NAC
TRIAE_CS42_6BS_TGACv1_514404_AA1659330	TRIAE_CS42_6BS_TGACv1_514404_AA1659330.1	High	bHLH
TRIAE_CS42_6BS_TGACv1_514711_AA1663590	TRIAE_CS42_6BS_TGACv1_514711_AA1663590.1	High	bHLH
TRIAE_CS42_6BS_TGACv1_514711_AA1663590	TRIAE_CS42_6BS_TGACv1_514711_AA1663590.2	High	bHLH
TRIAE_CS42_6BS_TGACv1_514876_AA1665250	TRIAE_CS42_6BS_TGACv1_514876_AA1665250.1	High	Whirly
TRIAE_CS42_6BS_TGACv1_514876_AA1665250	TRIAE_CS42_6BS_TGACv1_514876_AA1665250.2	High	Whirly
TRIAE_CS42_6BS_TGACv1_514876_AA1665250	TRIAE_CS42_6BS_TGACv1_514876_AA1665250.3	High	Whirly
TRIAE_CS42_6BS_TGACv1_514926_AA1665940	TRIAE_CS42_6BS_TGACv1_514926_AA1665940.1	High	bHLH
TRIAE_CS42_6BS_TGACv1_514926_AA1665940	TRIAE_CS42_6BS_TGACv1_514926_AA1665940.2	High	bHLH
TRIAE_CS42_6BS_TGACv1_515006_AA1666590	TRIAE_CS42_6BS_TGACv1_515006_AA1666590.1	High	bHLH
TRIAE_CS42_6BS_TGACv1_515006_AA1666590	TRIAE_CS42_6BS_TGACv1_515006_AA1666590.2	High	bHLH
TRIAE_CS42_6BS_TGACv1_515051_AA1666850	TRIAE_CS42_6BS_TGACv1_515051_AA1666850.1	High	BES1
TRIAE_CS42_6BS_TGACv1_515051_AA1666850	TRIAE_CS42_6BS_TGACv1_515051_AA1666850.2	High	BES1
TRIAE_CS42_6BS_TGACv1_515051_AA1666850	TRIAE_CS42_6BS_TGACv1_515051_AA1666850.3	High	BES1
TRIAE_CS42_6BS_TGACv1_515066_AA1666990	TRIAE_CS42_6BS_TGACv1_515066_AA1666990.1	High	FAR1
TRIAE_CS42_6BS_TGACv1_515376_AA1669770	TRIAE_CS42_6BS_TGACv1_515376_AA1669770.1	High	Nin-like
TRIAE_CS42_6BS_TGACv1_515508_AA1670570	TRIAE_CS42_6BS_TGACv1_515508_AA1670570.1	High	bZIP
TRIAE_CS42_6BS_TGACv1_515508_AA1670570	TRIAE_CS42_6BS_TGACv1_515508_AA1670570.2	High	bZIP
TRIAE_CS42_6BS_TGACv1_515508_AA1670570	TRIAE_CS42_6BS_TGACv1_515508_AA1670570.3	High	bZIP
TRIAE_CS42_6BS_TGACv1_515508_AA1670570	TRIAE_CS42_6BS_TGACv1_515508_AA1670570.4	High	bZIP
TRIAE_CS42_6BS_TGACv1_515508_AA1670570	TRIAE_CS42_6BS_TGACv1_515508_AA1670570.5	High	bZIP
TRIAE_CS42_6BS_TGACv1_515508_AA1670570	TRIAE_CS42_6BS_TGACv1_515508_AA1670570.6	High	bZIP
TRIAE_CS42_6BS_TGACv1_515656_AA1671610	TRIAE_CS42_6BS_TGACv1_515656_AA1671610.1	High	bZIP
TRIAE_CS42_6BS_TGACv1_515656_AA1671610	TRIAE_CS42_6BS_TGACv1_515656_AA1671610.2	High	bZIP
TRIAE_CS42_6BS_TGACv1_515656_AA1671610	TRIAE_CS42_6BS_TGACv1_515656_AA1671610.3	High	bZIP
TRIAE_CS42_6BS_TGACv1_515656_AA1671610	TRIAE_CS42_6BS_TGACv1_515656_AA1671610.4	High	bZIP
TRIAE_CS42_6BS_TGACv1_515698_AA1671860	TRIAE_CS42_6BS_TGACv1_515698_AA1671860.1	Low	WRKY
TRIAE_CS42_6BS_TGACv1_515816_AA1672560	TRIAE_CS42_6BS_TGACv1_515816_AA1672560.1	Low	NAC
TRIAE_CS42_6BS_TGACv1_515826_AA1672610	TRIAE_CS42_6BS_TGACv1_515826_AA1672610.1	High	bZIP
TRIAE_CS42_6BS_TGACv1_515826_AA1672610	TRIAE_CS42_6BS_TGACv1_515826_AA1672610.2	High	bZIP
TRIAE_CS42_6BS_TGACv1_515955_AA1673110	TRIAE_CS42_6BS_TGACv1_515955_AA1673110.1	High	FAR1
TRIAE_CS42_6BS_TGACv1_517936_AA1677290	TRIAE_CS42_6BS_TGACv1_517936_AA1677290.1	Low	Trihelix
TRIAE_CS42_6BS_TGACv1_517981_AA1677310	TRIAE_CS42_6BS_TGACv1_517981_AA1677310.1	High	FAR1
TRIAE_CS42_6BS_TGACv1_520057_AA1677790	TRIAE_CS42_6BS_TGACv1_520057_AA1677790.1	Low	FAR1
TRIAE_CS42_6DL_TGACv1_526314_AA1679250	TRIAE_CS42_6DL_TGACv1_526314_AA1679250.1	High	Trihelix
TRIAE_CS42_6DL_TGACv1_526318_AA1679380	TRIAE_CS42_6DL_TGACv1_526318_AA1679380.1	High	bZIP
TRIAE_CS42_6DL_TGACv1_526318_AA1679380	TRIAE_CS42_6DL_TGACv1_526318_AA1679380.2	High	bZIP
TRIAE_CS42_6DL_TGACv1_526318_AA1679380	TRIAE_CS42_6DL_TGACv1_526318_AA1679380.3	High	bZIP
TRIAE_CS42_6DL_TGACv1_526318_AA1679380	TRIAE_CS42_6DL_TGACv1_526318_AA1679380.4	High	bZIP
TRIAE_CS42_6DL_TGACv1_526318_AA1679380	TRIAE_CS42_6DL_TGACv1_526318_AA1679380.5	High	bZIP
TRIAE_CS42_6DL_TGACv1_526380_AA1681280	TRIAE_CS42_6DL_TGACv1_526380_AA1681280.1	High	WRKY
TRIAE_CS42_6DL_TGACv1_526389_AA1681810	TRIAE_CS42_6DL_TGACv1_526389_AA1681810.1	High	bHLH
TRIAE_CS42_6DL_TGACv1_526389_AA1681810	TRIAE_CS42_6DL_TGACv1_526389_AA1681810.2	High	bHLH
TRIAE_CS42_6DL_TGACv1_526389_AA1681810	TRIAE_CS42_6DL_TGACv1_526389_AA1681810.3	High	bHLH
TRIAE_CS42_6DL_TGACv1_526417_AA1682860	TRIAE_CS42_6DL_TGACv1_526417_AA1682860.1	High	GATA
TRIAE_CS42_6DL_TGACv1_526420_AA1682990	TRIAE_CS42_6DL_TGACv1_526420_AA1682990.1	High	bHLH
TRIAE_CS42_6DL_TGACv1_526495_AA1685260	TRIAE_CS42_6DL_TGACv1_526495_AA1685260.1	High	E2F/DP
TRIAE_CS42_6DL_TGACv1_526499_AA1685420	TRIAE_CS42_6DL_TGACv1_526499_AA1685420.1	Low	Nin-like
TRIAE_CS42_6DL_TGACv1_526508_AA1685740	TRIAE_CS42_6DL_TGACv1_526508_AA1685740.1	High	NF-YB
TRIAE_CS42_6DL_TGACv1_526527_AA1686200	TRIAE_CS42_6DL_TGACv1_526527_AA1686200.1	High	GRAS
TRIAE_CS42_6DL_TGACv1_526534_AA1686360	TRIAE_CS42_6DL_TGACv1_526534_AA1686360.1	Low	FAR1
TRIAE_CS42_6DL_TGACv1_526542_AA1686610	TRIAE_CS42_6DL_TGACv1_526542_AA1686610.1	High	TCP
TRIAE_CS42_6DL_TGACv1_526542_AA1686610	TRIAE_CS42_6DL_TGACv1_526542_AA1686610.2	High	TCP
TRIAE_CS42_6DL_TGACv1_526557_AA1687070	TRIAE_CS42_6DL_TGACv1_526557_AA1687070.1	Low	FAR1
TRIAE_CS42_6DL_TGACv1_526558_AA1687130	TRIAE_CS42_6DL_TGACv1_526558_AA1687130.1	High	NF-YB
TRIAE_CS42_6DL_TGACv1_526634_AA1688740	TRIAE_CS42_6DL_TGACv1_526634_AA1688740.1	High	NAC
TRIAE_CS42_6DL_TGACv1_526634_AA1688740	TRIAE_CS42_6DL_TGACv1_526634_AA1688740.2	High	NAC
TRIAE_CS42_6DL_TGACv1_526658_AA1689130	TRIAE_CS42_6DL_TGACv1_526658_AA1689130.1	High	FAR1
TRIAE_CS42_6DL_TGACv1_526709_AA1690310	TRIAE_CS42_6DL_TGACv1_526709_AA1690310.1	Low	FAR1
TRIAE_CS42_6DL_TGACv1_526724_AA1690540	TRIAE_CS42_6DL_TGACv1_526724_AA1690540.1	High	NAC
TRIAE_CS42_6DL_TGACv1_526801_AA1692260	TRIAE_CS42_6DL_TGACv1_526801_AA1692260.1	High	GATA
TRIAE_CS42_6DL_TGACv1_526801_AA1692260	TRIAE_CS42_6DL_TGACv1_526801_AA1692260.2	High	GATA
TRIAE_CS42_6DL_TGACv1_526801_AA1692260	TRIAE_CS42_6DL_TGACv1_526801_AA1692260.3	High	GATA
TRIAE_CS42_6DL_TGACv1_526801_AA1692260	TRIAE_CS42_6DL_TGACv1_526801_AA1692260.4	High	GATA
TRIAE_CS42_6DL_TGACv1_526801_AA1692260	TRIAE_CS42_6DL_TGACv1_526801_AA1692260.5	High	GATA
TRIAE_CS42_6DL_TGACv1_526801_AA1692260	TRIAE_CS42_6DL_TGACv1_526801_AA1692260.6	High	GATA
TRIAE_CS42_6DL_TGACv1_526801_AA1692260	TRIAE_CS42_6DL_TGACv1_526801_AA1692260.7	High	GATA
TRIAE_CS42_6DL_TGACv1_526808_AA1692430	TRIAE_CS42_6DL_TGACv1_526808_AA1692430.1	High	bHLH
TRIAE_CS42_6DL_TGACv1_526841_AA1693140	TRIAE_CS42_6DL_TGACv1_526841_AA1693140.1	Low	FAR1
TRIAE_CS42_6DL_TGACv1_526894_AA1694500	TRIAE_CS42_6DL_TGACv1_526894_AA1694500.1	High	bHLH
TRIAE_CS42_6DL_TGACv1_526898_AA1694620	TRIAE_CS42_6DL_TGACv1_526898_AA1694620.1	Low	FAR1
TRIAE_CS42_6DL_TGACv1_526900_AA1694630	TRIAE_CS42_6DL_TGACv1_526900_AA1694630.1	Low	FAR1
TRIAE_CS42_6DL_TGACv1_526949_AA1695780	TRIAE_CS42_6DL_TGACv1_526949_AA1695780.1	Low	FAR1
TRIAE_CS42_6DL_TGACv1_526949_AA1695780	TRIAE_CS42_6DL_TGACv1_526949_AA1695780.2	Low	FAR1
TRIAE_CS42_6DL_TGACv1_527050_AA1697750	TRIAE_CS42_6DL_TGACv1_527050_AA1697750.1	High	FAR1
TRIAE_CS42_6DL_TGACv1_527097_AA1698510	TRIAE_CS42_6DL_TGACv1_527097_AA1698510.1	Low	FAR1
TRIAE_CS42_6DL_TGACv1_527107_AA1698670	TRIAE_CS42_6DL_TGACv1_527107_AA1698670.1	High	GeBP
TRIAE_CS42_6DL_TGACv1_527107_AA1698670	TRIAE_CS42_6DL_TGACv1_527107_AA1698670.2	High	GeBP
TRIAE_CS42_6DL_TGACv1_527169_AA1699850	TRIAE_CS42_6DL_TGACv1_527169_AA1699850.1	High	EIL
TRIAE_CS42_6DL_TGACv1_527175_AA1700030	TRIAE_CS42_6DL_TGACv1_527175_AA1700030.1	High	LBD
TRIAE_CS42_6DL_TGACv1_527215_AA1700620	TRIAE_CS42_6DL_TGACv1_527215_AA1700620.1	High	bHLH
TRIAE_CS42_6DL_TGACv1_527219_AA1700720	TRIAE_CS42_6DL_TGACv1_527219_AA1700720.1	High	NAC
TRIAE_CS42_6DL_TGACv1_527258_AA1701400	TRIAE_CS42_6DL_TGACv1_527258_AA1701400.1	High	Dof
TRIAE_CS42_6DL_TGACv1_527258_AA1701400	TRIAE_CS42_6DL_TGACv1_527258_AA1701400.2	High	Dof
TRIAE_CS42_6DL_TGACv1_527262_AA1701490	TRIAE_CS42_6DL_TGACv1_527262_AA1701490.1	High	bHLH
TRIAE_CS42_6DL_TGACv1_527262_AA1701490	TRIAE_CS42_6DL_TGACv1_527262_AA1701490.2	High	bHLH
TRIAE_CS42_6DL_TGACv1_527275_AA1701670	TRIAE_CS42_6DL_TGACv1_527275_AA1701670.1	High	bHLH
TRIAE_CS42_6DL_TGACv1_527297_AA1701970	TRIAE_CS42_6DL_TGACv1_527297_AA1701970.1	Low	FAR1
TRIAE_CS42_6DL_TGACv1_527317_AA1702140	TRIAE_CS42_6DL_TGACv1_527317_AA1702140.1	High	TCP
TRIAE_CS42_6DL_TGACv1_527357_AA1702730	TRIAE_CS42_6DL_TGACv1_527357_AA1702730.1	High	NF-YB
TRIAE_CS42_6DL_TGACv1_527360_AA1702780	TRIAE_CS42_6DL_TGACv1_527360_AA1702780.1	High	bZIP
TRIAE_CS42_6DL_TGACv1_527411_AA1703590	TRIAE_CS42_6DL_TGACv1_527411_AA1703590.1	High	GeBP
TRIAE_CS42_6DL_TGACv1_527425_AA1703770	TRIAE_CS42_6DL_TGACv1_527425_AA1703770.1	High	Trihelix
TRIAE_CS42_6DL_TGACv1_527491_AA1704790	TRIAE_CS42_6DL_TGACv1_527491_AA1704790.1	High	NAC
TRIAE_CS42_6DL_TGACv1_527491_AA1704790	TRIAE_CS42_6DL_TGACv1_527491_AA1704790.2	High	NAC
TRIAE_CS42_6DL_TGACv1_527518_AA1705140	TRIAE_CS42_6DL_TGACv1_527518_AA1705140.1	High	NF-YA
TRIAE_CS42_6DL_TGACv1_527518_AA1705140	TRIAE_CS42_6DL_TGACv1_527518_AA1705140.2	High	NF-YA
TRIAE_CS42_6DL_TGACv1_527539_AA1705530	TRIAE_CS42_6DL_TGACv1_527539_AA1705530.1	High	Trihelix
TRIAE_CS42_6DL_TGACv1_527539_AA1705530	TRIAE_CS42_6DL_TGACv1_527539_AA1705530.2	High	Trihelix
TRIAE_CS42_6DL_TGACv1_527539_AA1705530	TRIAE_CS42_6DL_TGACv1_527539_AA1705530.3	High	Trihelix
TRIAE_CS42_6DL_TGACv1_527641_AA1706720	TRIAE_CS42_6DL_TGACv1_527641_AA1706720.1	High	NAC
TRIAE_CS42_6DL_TGACv1_527642_AA1706730	TRIAE_CS42_6DL_TGACv1_527642_AA1706730.1	High	bHLH
TRIAE_CS42_6DL_TGACv1_527673_AA1707150	TRIAE_CS42_6DL_TGACv1_527673_AA1707150.1	High	bHLH
TRIAE_CS42_6DL_TGACv1_527691_AA1707490	TRIAE_CS42_6DL_TGACv1_527691_AA1707490.1	High	BES1
TRIAE_CS42_6DL_TGACv1_527698_AA1707690	TRIAE_CS42_6DL_TGACv1_527698_AA1707690.1	High	bHLH
TRIAE_CS42_6DL_TGACv1_527698_AA1707690	TRIAE_CS42_6DL_TGACv1_527698_AA1707690.2	High	bHLH
TRIAE_CS42_6DL_TGACv1_527750_AA1708180	TRIAE_CS42_6DL_TGACv1_527750_AA1708180.1	High	Dof
TRIAE_CS42_6DL_TGACv1_527790_AA1708620	TRIAE_CS42_6DL_TGACv1_527790_AA1708620.1	High	NAC
TRIAE_CS42_6DL_TGACv1_527804_AA1708770	TRIAE_CS42_6DL_TGACv1_527804_AA1708770.1	High	Dof
TRIAE_CS42_6DL_TGACv1_527829_AA1709060	TRIAE_CS42_6DL_TGACv1_527829_AA1709060.1	High	bHLH
TRIAE_CS42_6DL_TGACv1_527829_AA1709060	TRIAE_CS42_6DL_TGACv1_527829_AA1709060.2	High	bHLH
TRIAE_CS42_6DL_TGACv1_527970_AA1710360	TRIAE_CS42_6DL_TGACv1_527970_AA1710360.1	High	NAC
TRIAE_CS42_6DL_TGACv1_528012_AA1710720	TRIAE_CS42_6DL_TGACv1_528012_AA1710720.1	Low	FAR1
TRIAE_CS42_6DL_TGACv1_528150_AA1712000	TRIAE_CS42_6DL_TGACv1_528150_AA1712000.1	High	WRKY
TRIAE_CS42_6DL_TGACv1_528207_AA1712480	TRIAE_CS42_6DL_TGACv1_528207_AA1712480.1	Low	FAR1
TRIAE_CS42_6DL_TGACv1_528285_AA1713040	TRIAE_CS42_6DL_TGACv1_528285_AA1713040.1	High	bHLH
TRIAE_CS42_6DL_TGACv1_528370_AA1713740	TRIAE_CS42_6DL_TGACv1_528370_AA1713740.1	High	FAR1
TRIAE_CS42_6DL_TGACv1_528383_AA1713780	TRIAE_CS42_6DL_TGACv1_528383_AA1713780.1	High	bHLH
TRIAE_CS42_6DL_TGACv1_528445_AA1714160	TRIAE_CS42_6DL_TGACv1_528445_AA1714160.1	High	TCP
TRIAE_CS42_6DL_TGACv1_528456_AA1714200	TRIAE_CS42_6DL_TGACv1_528456_AA1714200.1	High	bHLH
TRIAE_CS42_6DL_TGACv1_528508_AA1714720	TRIAE_CS42_6DL_TGACv1_528508_AA1714720.1	Low	NAC
TRIAE_CS42_6DL_TGACv1_528829_AA1716410	TRIAE_CS42_6DL_TGACv1_528829_AA1716410.1	High	NAC
TRIAE_CS42_6DL_TGACv1_529113_AA1717510	TRIAE_CS42_6DL_TGACv1_529113_AA1717510.1	Low	FAR1
TRIAE_CS42_6DL_TGACv1_529286_AA1717990	TRIAE_CS42_6DL_TGACv1_529286_AA1717990.1	High	Nin-like
TRIAE_CS42_6DL_TGACv1_530011_AA1719250	TRIAE_CS42_6DL_TGACv1_530011_AA1719250.1	High	bHLH
TRIAE_CS42_6DL_TGACv1_530887_AA1719600	TRIAE_CS42_6DL_TGACv1_530887_AA1719600.1	Low	FAR1
TRIAE_CS42_6DL_TGACv1_530907_AA1719620	TRIAE_CS42_6DL_TGACv1_530907_AA1719620.1	Low	FAR1
TRIAE_CS42_6DL_TGACv1_538222_AA1720270	TRIAE_CS42_6DL_TGACv1_538222_AA1720270.1	Low	FAR1
TRIAE_CS42_6DS_TGACv1_542462_AA1721080	TRIAE_CS42_6DS_TGACv1_542462_AA1721080.1	High	GRAS
TRIAE_CS42_6DS_TGACv1_542472_AA1721440	TRIAE_CS42_6DS_TGACv1_542472_AA1721440.1	Low	NAC
TRIAE_CS42_6DS_TGACv1_542484_AA1721940	TRIAE_CS42_6DS_TGACv1_542484_AA1721940.1	High	FAR1
TRIAE_CS42_6DS_TGACv1_542521_AA1723460	TRIAE_CS42_6DS_TGACv1_542521_AA1723460.1	Low	FAR1
TRIAE_CS42_6DS_TGACv1_542526_AA1723490	TRIAE_CS42_6DS_TGACv1_542526_AA1723490.1	High	bHLH
TRIAE_CS42_6DS_TGACv1_542560_AA1724330	TRIAE_CS42_6DS_TGACv1_542560_AA1724330.1	High	bHLH
TRIAE_CS42_6DS_TGACv1_542626_AA1725630	TRIAE_CS42_6DS_TGACv1_542626_AA1725630.1	High	NAC
TRIAE_CS42_6DS_TGACv1_542654_AA1726670	TRIAE_CS42_6DS_TGACv1_542654_AA1726670.1	Low	FAR1
TRIAE_CS42_6DS_TGACv1_542681_AA1727480	TRIAE_CS42_6DS_TGACv1_542681_AA1727480.1	Low	FAR1
TRIAE_CS42_6DS_TGACv1_542681_AA1727480	TRIAE_CS42_6DS_TGACv1_542681_AA1727480.2	Low	FAR1
TRIAE_CS42_6DS_TGACv1_542829_AA1731200	TRIAE_CS42_6DS_TGACv1_542829_AA1731200.1	Low	FAR1
TRIAE_CS42_6DS_TGACv1_542930_AA1732700	TRIAE_CS42_6DS_TGACv1_542930_AA1732700.1	High	bZIP
TRIAE_CS42_6DS_TGACv1_542936_AA1732920	TRIAE_CS42_6DS_TGACv1_542936_AA1732920.1	Low	FAR1
TRIAE_CS42_6DS_TGACv1_542939_AA1732980	TRIAE_CS42_6DS_TGACv1_542939_AA1732980.1	High	Trihelix
TRIAE_CS42_6DS_TGACv1_542979_AA1733650	TRIAE_CS42_6DS_TGACv1_542979_AA1733650.1	Low	FAR1
TRIAE_CS42_6DS_TGACv1_542999_AA1733920	TRIAE_CS42_6DS_TGACv1_542999_AA1733920.1	High	NF-YC
TRIAE_CS42_6DS_TGACv1_543033_AA1734380	TRIAE_CS42_6DS_TGACv1_543033_AA1734380.1	High	SBP
TRIAE_CS42_6DS_TGACv1_543033_AA1734380	TRIAE_CS42_6DS_TGACv1_543033_AA1734380.2	High	SBP
TRIAE_CS42_6DS_TGACv1_543033_AA1734380	TRIAE_CS42_6DS_TGACv1_543033_AA1734380.3	High	SBP
TRIAE_CS42_6DS_TGACv1_543033_AA1734380	TRIAE_CS42_6DS_TGACv1_543033_AA1734380.4	High	SBP
TRIAE_CS42_6DS_TGACv1_543033_AA1734380	TRIAE_CS42_6DS_TGACv1_543033_AA1734380.5	High	SBP
TRIAE_CS42_6DS_TGACv1_543033_AA1734380	TRIAE_CS42_6DS_TGACv1_543033_AA1734380.6	High	SBP
TRIAE_CS42_6DS_TGACv1_543050_AA1734740	TRIAE_CS42_6DS_TGACv1_543050_AA1734740.1	High	GATA
TRIAE_CS42_6DS_TGACv1_543095_AA1735290	TRIAE_CS42_6DS_TGACv1_543095_AA1735290.1	High	WRKY
TRIAE_CS42_6DS_TGACv1_543095_AA1735290	TRIAE_CS42_6DS_TGACv1_543095_AA1735290.2	High	WRKY
TRIAE_CS42_6DS_TGACv1_543130_AA1735880	TRIAE_CS42_6DS_TGACv1_543130_AA1735880.1	High	bZIP
TRIAE_CS42_6DS_TGACv1_543130_AA1735880	TRIAE_CS42_6DS_TGACv1_543130_AA1735880.2	High	bZIP
TRIAE_CS42_6DS_TGACv1_543145_AA1736120	TRIAE_CS42_6DS_TGACv1_543145_AA1736120.1	High	FAR1
TRIAE_CS42_6DS_TGACv1_543151_AA1736290	TRIAE_CS42_6DS_TGACv1_543151_AA1736290.1	Low	Trihelix
TRIAE_CS42_6DS_TGACv1_543292_AA1738090	TRIAE_CS42_6DS_TGACv1_543292_AA1738090.1	High	bHLH
TRIAE_CS42_6DS_TGACv1_543292_AA1738090	TRIAE_CS42_6DS_TGACv1_543292_AA1738090.2	High	bHLH
TRIAE_CS42_6DS_TGACv1_543297_AA1738120	TRIAE_CS42_6DS_TGACv1_543297_AA1738120.1	High	GATA
TRIAE_CS42_6DS_TGACv1_543297_AA1738120	TRIAE_CS42_6DS_TGACv1_543297_AA1738120.2	High	GATA
TRIAE_CS42_6DS_TGACv1_543355_AA1738820	TRIAE_CS42_6DS_TGACv1_543355_AA1738820.1	High	Nin-like
TRIAE_CS42_6DS_TGACv1_543357_AA1738940	TRIAE_CS42_6DS_TGACv1_543357_AA1738940.1	High	bZIP
TRIAE_CS42_6DS_TGACv1_543423_AA1739930	TRIAE_CS42_6DS_TGACv1_543423_AA1739930.1	High	FAR1
TRIAE_CS42_6DS_TGACv1_543722_AA1743370	TRIAE_CS42_6DS_TGACv1_543722_AA1743370.1	High	FAR1
TRIAE_CS42_6DS_TGACv1_543722_AA1743380	TRIAE_CS42_6DS_TGACv1_543722_AA1743380.1	High	Trihelix
TRIAE_CS42_6DS_TGACv1_543722_AA1743380	TRIAE_CS42_6DS_TGACv1_543722_AA1743380.2	High	Trihelix
TRIAE_CS42_6DS_TGACv1_543742_AA1743720	TRIAE_CS42_6DS_TGACv1_543742_AA1743720.1	High	Whirly
TRIAE_CS42_6DS_TGACv1_543836_AA1744580	TRIAE_CS42_6DS_TGACv1_543836_AA1744580.2	Low	WRKY
TRIAE_CS42_6DS_TGACv1_543913_AA1745220	TRIAE_CS42_6DS_TGACv1_543913_AA1745220.1	Low	FAR1
TRIAE_CS42_6DS_TGACv1_543918_AA1745290	TRIAE_CS42_6DS_TGACv1_543918_AA1745290.1	High	HSF
TRIAE_CS42_6DS_TGACv1_544004_AA1745890	TRIAE_CS42_6DS_TGACv1_544004_AA1745890.1	High	SBP
TRIAE_CS42_6DS_TGACv1_544038_AA1746180	TRIAE_CS42_6DS_TGACv1_544038_AA1746180.1	High	SBP
TRIAE_CS42_6DS_TGACv1_544752_AA1749280	TRIAE_CS42_6DS_TGACv1_544752_AA1749280.1	Low	WRKY
TRIAE_CS42_6DS_TGACv1_544758_AA1749290	TRIAE_CS42_6DS_TGACv1_544758_AA1749290.1	High	GRAS
TRIAE_CS42_6DS_TGACv1_545295_AA1750190	TRIAE_CS42_6DS_TGACv1_545295_AA1750190.1	High	bZIP
TRIAE_CS42_6DS_TGACv1_545295_AA1750190	TRIAE_CS42_6DS_TGACv1_545295_AA1750190.2	High	bZIP
TRIAE_CS42_6DS_TGACv1_545295_AA1750190	TRIAE_CS42_6DS_TGACv1_545295_AA1750190.3	High	bZIP
TRIAE_CS42_6DS_TGACv1_545295_AA1750190	TRIAE_CS42_6DS_TGACv1_545295_AA1750190.4	High	bZIP
TRIAE_CS42_6DS_TGACv1_545832_AA1750520	TRIAE_CS42_6DS_TGACv1_545832_AA1750520.1	Low	NAC
TRIAE_CS42_6DS_TGACv1_549126_AA1751050	TRIAE_CS42_6DS_TGACv1_549126_AA1751050.1	Low	FAR1
TRIAE_CS42_6DS_TGACv1_550674_AA1751190	TRIAE_CS42_6DS_TGACv1_550674_AA1751190.1	Low	FAR1
TRIAE_CS42_6DS_TGACv1_555577_AA1751380	TRIAE_CS42_6DS_TGACv1_555577_AA1751380.1	High	FAR1
TRIAE_CS42_7AL_TGACv1_555978_AA1751570	TRIAE_CS42_7AL_TGACv1_555978_AA1751570.1	High	WRKY
TRIAE_CS42_7AL_TGACv1_555988_AA1751800	TRIAE_CS42_7AL_TGACv1_555988_AA1751800.1	High	FAR1
TRIAE_CS42_7AL_TGACv1_556011_AA1752630	TRIAE_CS42_7AL_TGACv1_556011_AA1752630.1	Low	NF-YB
TRIAE_CS42_7AL_TGACv1_556014_AA1752750	TRIAE_CS42_7AL_TGACv1_556014_AA1752750.1	High	bHLH
TRIAE_CS42_7AL_TGACv1_556045_AA1753510	TRIAE_CS42_7AL_TGACv1_556045_AA1753510.1	High	FAR1
TRIAE_CS42_7AL_TGACv1_556045_AA1753510	TRIAE_CS42_7AL_TGACv1_556045_AA1753510.2	High	FAR1
TRIAE_CS42_7AL_TGACv1_556045_AA1753510	TRIAE_CS42_7AL_TGACv1_556045_AA1753510.3	High	FAR1
TRIAE_CS42_7AL_TGACv1_556045_AA1753510	TRIAE_CS42_7AL_TGACv1_556045_AA1753510.4	High	FAR1
TRIAE_CS42_7AL_TGACv1_556045_AA1753510	TRIAE_CS42_7AL_TGACv1_556045_AA1753510.5	High	FAR1
TRIAE_CS42_7AL_TGACv1_556045_AA1753510	TRIAE_CS42_7AL_TGACv1_556045_AA1753510.6	High	FAR1
TRIAE_CS42_7AL_TGACv1_556067_AA1754380	TRIAE_CS42_7AL_TGACv1_556067_AA1754380.1	High	SBP
TRIAE_CS42_7AL_TGACv1_556069_AA1754420	TRIAE_CS42_7AL_TGACv1_556069_AA1754420.1	High	NF-X1
TRIAE_CS42_7AL_TGACv1_556071_AA1754590	TRIAE_CS42_7AL_TGACv1_556071_AA1754590.1	High	NAC
TRIAE_CS42_7AL_TGACv1_556102_AA1755870	TRIAE_CS42_7AL_TGACv1_556102_AA1755870.1	Low	FAR1
TRIAE_CS42_7AL_TGACv1_556146_AA1756990	TRIAE_CS42_7AL_TGACv1_556146_AA1756990.1	Low	FAR1
TRIAE_CS42_7AL_TGACv1_556150_AA1757040	TRIAE_CS42_7AL_TGACv1_556150_AA1757040.1	High	NAC
TRIAE_CS42_7AL_TGACv1_556170_AA1757400	TRIAE_CS42_7AL_TGACv1_556170_AA1757400.1	High	NAC
TRIAE_CS42_7AL_TGACv1_556179_AA1757630	TRIAE_CS42_7AL_TGACv1_556179_AA1757630.1	High	WRKY
TRIAE_CS42_7AL_TGACv1_556203_AA1758120	TRIAE_CS42_7AL_TGACv1_556203_AA1758120.1	High	NAC
TRIAE_CS42_7AL_TGACv1_556203_AA1758130	TRIAE_CS42_7AL_TGACv1_556203_AA1758130.1	High	NAC
TRIAE_CS42_7AL_TGACv1_556228_AA1758800	TRIAE_CS42_7AL_TGACv1_556228_AA1758800.1	High	SBP
TRIAE_CS42_7AL_TGACv1_556228_AA1758810	TRIAE_CS42_7AL_TGACv1_556228_AA1758810.1	High	SBP
TRIAE_CS42_6BL_TGACv1_499488_AA1584080	TRIAE_CS42_6BL_TGACv1_499488_AA1584080.1	High	ARF
TRIAE_CS42_6BS_TGACv1_514811_AA1664620	TRIAE_CS42_6BS_TGACv1_514811_AA1664620.1	High	ARF
TRIAE_CS42_6BS_TGACv1_514811_AA1664620	TRIAE_CS42_6BS_TGACv1_514811_AA1664620.2	High	ARF
TRIAE_CS42_6BS_TGACv1_514824_AA1664750	TRIAE_CS42_6BS_TGACv1_514824_AA1664750.1	High	ARF
TRIAE_CS42_6BS_TGACv1_514824_AA1664750	TRIAE_CS42_6BS_TGACv1_514824_AA1664750.2	High	ARF
TRIAE_CS42_6BS_TGACv1_514824_AA1664750	TRIAE_CS42_6BS_TGACv1_514824_AA1664750.3	High	ARF
TRIAE_CS42_6BS_TGACv1_514824_AA1664750	TRIAE_CS42_6BS_TGACv1_514824_AA1664750.4	High	ARF
TRIAE_CS42_6BS_TGACv1_514824_AA1664750	TRIAE_CS42_6BS_TGACv1_514824_AA1664750.5	High	ARF
TRIAE_CS42_6BS_TGACv1_514824_AA1664750	TRIAE_CS42_6BS_TGACv1_514824_AA1664750.6	High	ARF
TRIAE_CS42_6DL_TGACv1_526473_AA1684570	TRIAE_CS42_6DL_TGACv1_526473_AA1684570.1	High	ARF
TRIAE_CS42_6DS_TGACv1_542633_AA1725840	TRIAE_CS42_6DS_TGACv1_542633_AA1725840.1	High	ARF
TRIAE_CS42_6DS_TGACv1_542633_AA1725840	TRIAE_CS42_6DS_TGACv1_542633_AA1725840.2	High	ARF
TRIAE_CS42_6DS_TGACv1_542633_AA1725840	TRIAE_CS42_6DS_TGACv1_542633_AA1725840.3	High	ARF
TRIAE_CS42_6DS_TGACv1_542633_AA1725840	TRIAE_CS42_6DS_TGACv1_542633_AA1725840.4	High	ARF
TRIAE_CS42_6DS_TGACv1_543229_AA1737230	TRIAE_CS42_6DS_TGACv1_543229_AA1737230.1	High	ARF
TRIAE_CS42_6BL_TGACv1_499444_AA1582640	TRIAE_CS42_6BL_TGACv1_499444_AA1582640.1	Low	B3
TRIAE_CS42_6BL_TGACv1_499569_AA1586420	TRIAE_CS42_6BL_TGACv1_499569_AA1586420.1	Low	B3
TRIAE_CS42_6BL_TGACv1_499611_AA1587320	TRIAE_CS42_6BL_TGACv1_499611_AA1587320.1	Low	B3
TRIAE_CS42_6BL_TGACv1_500107_AA1599000	TRIAE_CS42_6BL_TGACv1_500107_AA1599000.1	Low	B3
TRIAE_CS42_6BL_TGACv1_500213_AA1601400	TRIAE_CS42_6BL_TGACv1_500213_AA1601400.1	High	B3
TRIAE_CS42_6BL_TGACv1_500213_AA1601400	TRIAE_CS42_6BL_TGACv1_500213_AA1601400.2	High	B3
TRIAE_CS42_6BL_TGACv1_500224_AA1601620	TRIAE_CS42_6BL_TGACv1_500224_AA1601620.1	Low	B3
TRIAE_CS42_6BL_TGACv1_500720_AA1608740	TRIAE_CS42_6BL_TGACv1_500720_AA1608740.1	High	B3
TRIAE_CS42_6BL_TGACv1_500720_AA1608740	TRIAE_CS42_6BL_TGACv1_500720_AA1608740.2	High	B3
TRIAE_CS42_6BL_TGACv1_500720_AA1608770	TRIAE_CS42_6BL_TGACv1_500720_AA1608770.1	High	B3
TRIAE_CS42_6BL_TGACv1_501328_AA1616070	TRIAE_CS42_6BL_TGACv1_501328_AA1616070.1	Low	B3
TRIAE_CS42_6BL_TGACv1_501759_AA1620620	TRIAE_CS42_6BL_TGACv1_501759_AA1620620.1	Low	B3
TRIAE_CS42_6BL_TGACv1_502794_AA1626430	TRIAE_CS42_6BL_TGACv1_502794_AA1626430.1	Low	B3
TRIAE_CS42_6BS_TGACv1_513186_AA1633420	TRIAE_CS42_6BS_TGACv1_513186_AA1633420.1	High	B3
TRIAE_CS42_6BS_TGACv1_514583_AA1661810	TRIAE_CS42_6BS_TGACv1_514583_AA1661810.1	Low	B3
TRIAE_CS42_6BS_TGACv1_514691_AA1663330	TRIAE_CS42_6BS_TGACv1_514691_AA1663330.1	Low	B3
TRIAE_CS42_6BS_TGACv1_515543_AA1670800	TRIAE_CS42_6BS_TGACv1_515543_AA1670800.1	Low	B3
TRIAE_CS42_6BS_TGACv1_516296_AA1674720	TRIAE_CS42_6BS_TGACv1_516296_AA1674720.1	Low	B3
TRIAE_CS42_6DL_TGACv1_526665_AA1689340	TRIAE_CS42_6DL_TGACv1_526665_AA1689340.1	High	B3
TRIAE_CS42_6DL_TGACv1_526665_AA1689340	TRIAE_CS42_6DL_TGACv1_526665_AA1689340.2	High	B3
TRIAE_CS42_6DL_TGACv1_526665_AA1689340	TRIAE_CS42_6DL_TGACv1_526665_AA1689340.3	High	B3
TRIAE_CS42_6DL_TGACv1_526775_AA1691870	TRIAE_CS42_6DL_TGACv1_526775_AA1691870.1	Low	B3
TRIAE_CS42_6DL_TGACv1_526930_AA1695380	TRIAE_CS42_6DL_TGACv1_526930_AA1695380.1	Low	B3
TRIAE_CS42_6DL_TGACv1_527119_AA1698900	TRIAE_CS42_6DL_TGACv1_527119_AA1698900.1	Low	B3
TRIAE_CS42_6DL_TGACv1_527242_AA1701040	TRIAE_CS42_6DL_TGACv1_527242_AA1701040.1	Low	B3
TRIAE_CS42_6DL_TGACv1_527381_AA1703090	TRIAE_CS42_6DL_TGACv1_527381_AA1703090.1	High	B3
TRIAE_CS42_6DL_TGACv1_527381_AA1703090	TRIAE_CS42_6DL_TGACv1_527381_AA1703090.2	High	B3
TRIAE_CS42_6DL_TGACv1_527381_AA1703090	TRIAE_CS42_6DL_TGACv1_527381_AA1703090.3	High	B3
TRIAE_CS42_6DL_TGACv1_527726_AA1707990	TRIAE_CS42_6DL_TGACv1_527726_AA1707990.1	Low	B3
TRIAE_CS42_6DL_TGACv1_528153_AA1712080	TRIAE_CS42_6DL_TGACv1_528153_AA1712080.1	Low	B3
TRIAE_CS42_6DL_TGACv1_528759_AA1716050	TRIAE_CS42_6DL_TGACv1_528759_AA1716050.1	Low	B3
TRIAE_CS42_6DL_TGACv1_529372_AA1718200	TRIAE_CS42_6DL_TGACv1_529372_AA1718200.1	High	B3
TRIAE_CS42_6DS_TGACv1_542520_AA1723400	TRIAE_CS42_6DS_TGACv1_542520_AA1723400.1	Low	B3
TRIAE_CS42_6DS_TGACv1_542639_AA1726170	TRIAE_CS42_6DS_TGACv1_542639_AA1726170.1	Low	B3
TRIAE_CS42_6DS_TGACv1_542925_AA1732620	TRIAE_CS42_6DS_TGACv1_542925_AA1732620.1	High	B3
TRIAE_CS42_6DS_TGACv1_542925_AA1732620	TRIAE_CS42_6DS_TGACv1_542925_AA1732620.2	High	B3
TRIAE_CS42_6DS_TGACv1_542969_AA1733480	TRIAE_CS42_6DS_TGACv1_542969_AA1733480.1	High	B3
TRIAE_CS42_6DS_TGACv1_543011_AA1734130	TRIAE_CS42_6DS_TGACv1_543011_AA1734130.1	Low	B3
TRIAE_CS42_6DS_TGACv1_543772_AA1744060	TRIAE_CS42_6DS_TGACv1_543772_AA1744060.1	High	B3
TRIAE_CS42_6DS_TGACv1_543772_AA1744060	TRIAE_CS42_6DS_TGACv1_543772_AA1744060.2	High	B3
TRIAE_CS42_6DS_TGACv1_543772_AA1744060	TRIAE_CS42_6DS_TGACv1_543772_AA1744060.3	High	B3
TRIAE_CS42_6DS_TGACv1_543772_AA1744060	TRIAE_CS42_6DS_TGACv1_543772_AA1744060.4	High	B3
TRIAE_CS42_7AL_TGACv1_556228_AA1758790	TRIAE_CS42_7AL_TGACv1_556228_AA1758790.1	Low	B3
TRIAE_CS42_6BL_TGACv1_500270_AA1602470	TRIAE_CS42_6BL_TGACv1_500270_AA1602470.1	High	AP2
TRIAE_CS42_6BL_TGACv1_500852_AA1610750	TRIAE_CS42_6BL_TGACv1_500852_AA1610750.1	High	AP2
TRIAE_CS42_6BL_TGACv1_500852_AA1610750	TRIAE_CS42_6BL_TGACv1_500852_AA1610750.2	High	AP2
TRIAE_CS42_6BL_TGACv1_500852_AA1610750	TRIAE_CS42_6BL_TGACv1_500852_AA1610750.3	High	AP2
TRIAE_CS42_6BL_TGACv1_500852_AA1610750	TRIAE_CS42_6BL_TGACv1_500852_AA1610750.4	High	AP2
TRIAE_CS42_6BS_TGACv1_513158_AA1632460	TRIAE_CS42_6BS_TGACv1_513158_AA1632460.1	High	AP2
TRIAE_CS42_6BS_TGACv1_513158_AA1632480	TRIAE_CS42_6BS_TGACv1_513158_AA1632480.1	High	AP2
TRIAE_CS42_6BS_TGACv1_513198_AA1634000	TRIAE_CS42_6BS_TGACv1_513198_AA1634000.1	High	AP2
TRIAE_CS42_6BS_TGACv1_513499_AA1643610	TRIAE_CS42_6BS_TGACv1_513499_AA1643610.1	Low	AP2
TRIAE_CS42_6BS_TGACv1_513499_AA1643620	TRIAE_CS42_6BS_TGACv1_513499_AA1643620.1	High	AP2
TRIAE_CS42_6BS_TGACv1_513611_AA1645790	TRIAE_CS42_6BS_TGACv1_513611_AA1645790.1	High	AP2
TRIAE_CS42_6DL_TGACv1_526856_AA1693610	TRIAE_CS42_6DL_TGACv1_526856_AA1693610.1	High	AP2
TRIAE_CS42_6DL_TGACv1_527206_AA1700490	TRIAE_CS42_6DL_TGACv1_527206_AA1700490.1	High	AP2
TRIAE_CS42_6DL_TGACv1_527206_AA1700490	TRIAE_CS42_6DL_TGACv1_527206_AA1700490.2	High	AP2
TRIAE_CS42_6DS_TGACv1_542620_AA1725510	TRIAE_CS42_6DS_TGACv1_542620_AA1725510.1	Low	AP2
TRIAE_CS42_6DS_TGACv1_542620_AA1725510	TRIAE_CS42_6DS_TGACv1_542620_AA1725510.2	Low	AP2
TRIAE_CS42_6DS_TGACv1_542660_AA1726800	TRIAE_CS42_6DS_TGACv1_542660_AA1726800.1	High	AP2
TRIAE_CS42_6DS_TGACv1_542995_AA1733800	TRIAE_CS42_6DS_TGACv1_542995_AA1733800.1	Low	AP2
TRIAE_CS42_6DS_TGACv1_543162_AA1736390	TRIAE_CS42_6DS_TGACv1_543162_AA1736390.1	Low	AP2
TRIAE_CS42_6DS_TGACv1_543162_AA1736400	TRIAE_CS42_6DS_TGACv1_543162_AA1736400.1	Low	AP2
TRIAE_CS42_6DS_TGACv1_543162_AA1736410	TRIAE_CS42_6DS_TGACv1_543162_AA1736410.1	High	AP2
TRIAE_CS42_6BL_TGACv1_499444_AA1582630	TRIAE_CS42_6BL_TGACv1_499444_AA1582630.1	High	ERF
TRIAE_CS42_6BL_TGACv1_499444_AA1582630	TRIAE_CS42_6BL_TGACv1_499444_AA1582630.2	High	ERF
TRIAE_CS42_6BL_TGACv1_499444_AA1582630	TRIAE_CS42_6BL_TGACv1_499444_AA1582630.3	High	ERF
TRIAE_CS42_6BL_TGACv1_499472_AA1583560	TRIAE_CS42_6BL_TGACv1_499472_AA1583560.1	High	ERF
TRIAE_CS42_6BL_TGACv1_499514_AA1584790	TRIAE_CS42_6BL_TGACv1_499514_AA1584790.1	High	ERF
TRIAE_CS42_6BL_TGACv1_500010_AA1597160	TRIAE_CS42_6BL_TGACv1_500010_AA1597160.1	High	ERF
TRIAE_CS42_6BL_TGACv1_500080_AA1598470	TRIAE_CS42_6BL_TGACv1_500080_AA1598470.1	High	ERF
TRIAE_CS42_6BL_TGACv1_500423_AA1604360	TRIAE_CS42_6BL_TGACv1_500423_AA1604360.1	High	ERF
TRIAE_CS42_6BL_TGACv1_500618_AA1607380	TRIAE_CS42_6BL_TGACv1_500618_AA1607380.1	High	ERF
TRIAE_CS42_6BL_TGACv1_500651_AA1607970	TRIAE_CS42_6BL_TGACv1_500651_AA1607970.1	High	ERF
TRIAE_CS42_6BL_TGACv1_500651_AA1607990	TRIAE_CS42_6BL_TGACv1_500651_AA1607990.1	High	ERF
TRIAE_CS42_6BL_TGACv1_500696_AA1608500	TRIAE_CS42_6BL_TGACv1_500696_AA1608500.1	High	ERF
TRIAE_CS42_6BL_TGACv1_500735_AA1609070	TRIAE_CS42_6BL_TGACv1_500735_AA1609070.1	High	ERF
TRIAE_CS42_6BL_TGACv1_500744_AA1609150	TRIAE_CS42_6BL_TGACv1_500744_AA1609150.1	High	ERF
TRIAE_CS42_6BL_TGACv1_500795_AA1609790	TRIAE_CS42_6BL_TGACv1_500795_AA1609790.1	High	ERF
TRIAE_CS42_6BL_TGACv1_501337_AA1616170	TRIAE_CS42_6BL_TGACv1_501337_AA1616170.1	High	ERF
TRIAE_CS42_6BL_TGACv1_502029_AA1622520	TRIAE_CS42_6BL_TGACv1_502029_AA1622520.1	High	ERF
TRIAE_CS42_6BL_TGACv1_502091_AA1623020	TRIAE_CS42_6BL_TGACv1_502091_AA1623020.1	High	ERF
TRIAE_CS42_6BL_TGACv1_503082_AA1627210	TRIAE_CS42_6BL_TGACv1_503082_AA1627210.1	High	ERF
TRIAE_CS42_6BS_TGACv1_513143_AA1631850	TRIAE_CS42_6BS_TGACv1_513143_AA1631850.1	Low	ERF
TRIAE_CS42_6BS_TGACv1_513167_AA1632810	TRIAE_CS42_6BS_TGACv1_513167_AA1632810.1	High	ERF
TRIAE_CS42_6BS_TGACv1_513265_AA1636570	TRIAE_CS42_6BS_TGACv1_513265_AA1636570.1	High	ERF
TRIAE_CS42_6BS_TGACv1_513392_AA1640090	TRIAE_CS42_6BS_TGACv1_513392_AA1640090.1	High	ERF
TRIAE_CS42_6BS_TGACv1_513392_AA1640090	TRIAE_CS42_6BS_TGACv1_513392_AA1640090.2	High	ERF
TRIAE_CS42_6BS_TGACv1_513399_AA1640350	TRIAE_CS42_6BS_TGACv1_513399_AA1640350.1	Low	ERF
TRIAE_CS42_6BS_TGACv1_514652_AA1662760	TRIAE_CS42_6BS_TGACv1_514652_AA1662760.1	High	ERF
TRIAE_CS42_6BS_TGACv1_514652_AA1662760	TRIAE_CS42_6BS_TGACv1_514652_AA1662760.2	High	ERF
TRIAE_CS42_6BS_TGACv1_514865_AA1665170	TRIAE_CS42_6BS_TGACv1_514865_AA1665170.1	High	ERF
TRIAE_CS42_6BS_TGACv1_515039_AA1666840	TRIAE_CS42_6BS_TGACv1_515039_AA1666840.1	Low	ERF
TRIAE_CS42_6BS_TGACv1_515273_AA1668850	TRIAE_CS42_6BS_TGACv1_515273_AA1668850.1	High	ERF
TRIAE_CS42_6BS_TGACv1_515273_AA1668850	TRIAE_CS42_6BS_TGACv1_515273_AA1668850.2	High	ERF
TRIAE_CS42_6DL_TGACv1_526315_AA1679280	TRIAE_CS42_6DL_TGACv1_526315_AA1679280.1	High	ERF
TRIAE_CS42_6DL_TGACv1_526315_AA1679280	TRIAE_CS42_6DL_TGACv1_526315_AA1679280.2	High	ERF
TRIAE_CS42_6DL_TGACv1_526316_AA1679300	TRIAE_CS42_6DL_TGACv1_526316_AA1679300.1	Low	ERF
TRIAE_CS42_6DL_TGACv1_526331_AA1679610	TRIAE_CS42_6DL_TGACv1_526331_AA1679610.1	High	ERF
TRIAE_CS42_6DL_TGACv1_526341_AA1680010	TRIAE_CS42_6DL_TGACv1_526341_AA1680010.1	High	ERF
TRIAE_CS42_6DL_TGACv1_526444_AA1683700	TRIAE_CS42_6DL_TGACv1_526444_AA1683700.1	High	ERF
TRIAE_CS42_6DL_TGACv1_526447_AA1683760	TRIAE_CS42_6DL_TGACv1_526447_AA1683760.1	Low	ERF
TRIAE_CS42_6DL_TGACv1_526479_AA1684710	TRIAE_CS42_6DL_TGACv1_526479_AA1684710.1	High	ERF
TRIAE_CS42_6DL_TGACv1_526479_AA1684720	TRIAE_CS42_6DL_TGACv1_526479_AA1684720.1	High	ERF
TRIAE_CS42_6DL_TGACv1_526479_AA1684740	TRIAE_CS42_6DL_TGACv1_526479_AA1684740.1	High	ERF
TRIAE_CS42_6DL_TGACv1_526581_AA1687490	TRIAE_CS42_6DL_TGACv1_526581_AA1687490.1	High	ERF
TRIAE_CS42_6DL_TGACv1_526681_AA1689770	TRIAE_CS42_6DL_TGACv1_526681_AA1689770.1	High	ERF
TRIAE_CS42_6DL_TGACv1_526864_AA1693770	TRIAE_CS42_6DL_TGACv1_526864_AA1693770.1	High	ERF
TRIAE_CS42_6DL_TGACv1_526875_AA1694090	TRIAE_CS42_6DL_TGACv1_526875_AA1694090.1	High	ERF
TRIAE_CS42_6DL_TGACv1_527023_AA1697360	TRIAE_CS42_6DL_TGACv1_527023_AA1697360.1	High	ERF
TRIAE_CS42_6DL_TGACv1_527183_AA1700100	TRIAE_CS42_6DL_TGACv1_527183_AA1700100.1	Low	ERF
TRIAE_CS42_6DL_TGACv1_527316_AA1702120	TRIAE_CS42_6DL_TGACv1_527316_AA1702120.1	High	ERF
TRIAE_CS42_6DL_TGACv1_527421_AA1703740	TRIAE_CS42_6DL_TGACv1_527421_AA1703740.1	High	ERF
TRIAE_CS42_6DL_TGACv1_527768_AA1708370	TRIAE_CS42_6DL_TGACv1_527768_AA1708370.1	High	ERF
TRIAE_CS42_6DL_TGACv1_528052_AA1711160	TRIAE_CS42_6DL_TGACv1_528052_AA1711160.1	High	ERF
TRIAE_CS42_6DL_TGACv1_528188_AA1712310	TRIAE_CS42_6DL_TGACv1_528188_AA1712310.1	High	ERF
TRIAE_CS42_6DL_TGACv1_528327_AA1713290	TRIAE_CS42_6DL_TGACv1_528327_AA1713290.1	High	ERF
TRIAE_CS42_6DL_TGACv1_529086_AA1717400	TRIAE_CS42_6DL_TGACv1_529086_AA1717400.1	High	ERF
TRIAE_CS42_6DS_TGACv1_542507_AA1723010	TRIAE_CS42_6DS_TGACv1_542507_AA1723010.1	High	ERF
TRIAE_CS42_6DS_TGACv1_542507_AA1723010	TRIAE_CS42_6DS_TGACv1_542507_AA1723010.2	High	ERF
TRIAE_CS42_6DS_TGACv1_542765_AA1729830	TRIAE_CS42_6DS_TGACv1_542765_AA1729830.1	High	ERF
TRIAE_CS42_6DS_TGACv1_542874_AA1731930	TRIAE_CS42_6DS_TGACv1_542874_AA1731930.1	Low	ERF
TRIAE_CS42_6DS_TGACv1_542884_AA1732270	TRIAE_CS42_6DS_TGACv1_542884_AA1732270.1	High	ERF
TRIAE_CS42_6DS_TGACv1_542972_AA1733530	TRIAE_CS42_6DS_TGACv1_542972_AA1733530.1	High	ERF
TRIAE_CS42_6DS_TGACv1_543146_AA1736180	TRIAE_CS42_6DS_TGACv1_543146_AA1736180.1	Low	ERF
TRIAE_CS42_6DS_TGACv1_543313_AA1738410	TRIAE_CS42_6DS_TGACv1_543313_AA1738410.1	High	ERF
TRIAE_CS42_6DS_TGACv1_543379_AA1739280	TRIAE_CS42_6DS_TGACv1_543379_AA1739280.1	Low	ERF
TRIAE_CS42_6DS_TGACv1_543415_AA1739720	TRIAE_CS42_6DS_TGACv1_543415_AA1739720.1	High	ERF
TRIAE_CS42_6DS_TGACv1_543600_AA1741960	TRIAE_CS42_6DS_TGACv1_543600_AA1741960.1	Low	ERF
TRIAE_CS42_6DS_TGACv1_543844_AA1744630	TRIAE_CS42_6DS_TGACv1_543844_AA1744630.1	Low	ERF
TRIAE_CS42_6DS_TGACv1_544465_AA1748410	TRIAE_CS42_6DS_TGACv1_544465_AA1748410.1	Low	ERF
TRIAE_CS42_6DS_TGACv1_544672_AA1749120	TRIAE_CS42_6DS_TGACv1_544672_AA1749120.1	High	ERF
TRIAE_CS42_7AL_TGACv1_556024_AA1752980	TRIAE_CS42_7AL_TGACv1_556024_AA1752980.1	High	ERF
TRIAE_CS42_7AL_TGACv1_556039_AA1753370	TRIAE_CS42_7AL_TGACv1_556039_AA1753370.1	High	ERF
TRIAE_CS42_6BL_TGACv1_500192_AA1600940	TRIAE_CS42_6BL_TGACv1_500192_AA1600940.1	High	DBB
TRIAE_CS42_6BL_TGACv1_502042_AA1622640	TRIAE_CS42_6BL_TGACv1_502042_AA1622640.1	High	DBB
TRIAE_CS42_6BL_TGACv1_502042_AA1622640	TRIAE_CS42_6BL_TGACv1_502042_AA1622640.2	High	DBB
TRIAE_CS42_6BS_TGACv1_514227_AA1657240	TRIAE_CS42_6BS_TGACv1_514227_AA1657240.1	High	DBB
TRIAE_CS42_6DL_TGACv1_526384_AA1681470	TRIAE_CS42_6DL_TGACv1_526384_AA1681470.1	High	DBB
TRIAE_CS42_6DL_TGACv1_527440_AA1704030	TRIAE_CS42_6DL_TGACv1_527440_AA1704030.1	High	DBB
TRIAE_CS42_6DL_TGACv1_527440_AA1704030	TRIAE_CS42_6DL_TGACv1_527440_AA1704030.2	High	DBB
TRIAE_CS42_6DS_TGACv1_544607_AA1748880	TRIAE_CS42_6DS_TGACv1_544607_AA1748880.1	High	DBB
TRIAE_CS42_6BL_TGACv1_499501_AA1584390	TRIAE_CS42_6BL_TGACv1_499501_AA1584390.1	High	CO-like
TRIAE_CS42_6BL_TGACv1_499501_AA1584390	TRIAE_CS42_6BL_TGACv1_499501_AA1584390.2	High	CO-like
TRIAE_CS42_6BL_TGACv1_499501_AA1584390	TRIAE_CS42_6BL_TGACv1_499501_AA1584390.3	High	CO-like
TRIAE_CS42_6BL_TGACv1_500190_AA1600890	TRIAE_CS42_6BL_TGACv1_500190_AA1600890.1	High	CO-like
TRIAE_CS42_6BL_TGACv1_500687_AA1608470	TRIAE_CS42_6BL_TGACv1_500687_AA1608470.1	High	CO-like
TRIAE_CS42_6BL_TGACv1_500703_AA1608580	TRIAE_CS42_6BL_TGACv1_500703_AA1608580.1	High	CO-like
TRIAE_CS42_6BS_TGACv1_514140_AA1655930	TRIAE_CS42_6BS_TGACv1_514140_AA1655930.1	High	CO-like
TRIAE_CS42_6DL_TGACv1_527355_AA1702700	TRIAE_CS42_6DL_TGACv1_527355_AA1702700.1	High	CO-like
TRIAE_CS42_6DL_TGACv1_528750_AA1715980	TRIAE_CS42_6DL_TGACv1_528750_AA1715980.1	High	CO-like
TRIAE_CS42_6DL_TGACv1_528750_AA1715980	TRIAE_CS42_6DL_TGACv1_528750_AA1715980.2	High	CO-like
TRIAE_CS42_6DL_TGACv1_528750_AA1715980	TRIAE_CS42_6DL_TGACv1_528750_AA1715980.3	High	CO-like
TRIAE_CS42_6DL_TGACv1_528750_AA1715980	TRIAE_CS42_6DL_TGACv1_528750_AA1715980.4	High	CO-like
TRIAE_CS42_6DL_TGACv1_529644_AA1718660	TRIAE_CS42_6DL_TGACv1_529644_AA1718660.1	High	CO-like
TRIAE_CS42_6DL_TGACv1_530141_AA1719340	TRIAE_CS42_6DL_TGACv1_530141_AA1719340.1	High	CO-like
TRIAE_CS42_6DS_TGACv1_544624_AA1748960	TRIAE_CS42_6DS_TGACv1_544624_AA1748960.1	High	CO-like
TRIAE_CS42_6DS_TGACv1_544624_AA1748960	TRIAE_CS42_6DS_TGACv1_544624_AA1748960.2	High	CO-like
TRIAE_CS42_7AL_TGACv1_556212_AA1758420	TRIAE_CS42_7AL_TGACv1_556212_AA1758420.1	High	CO-like
TRIAE_CS42_7AL_TGACv1_556212_AA1758420	TRIAE_CS42_7AL_TGACv1_556212_AA1758420.2	High	CO-like
TRIAE_CS42_6BL_TGACv1_499596_AA1587010	TRIAE_CS42_6BL_TGACv1_499596_AA1587010.1	High	ARR-B
TRIAE_CS42_6BL_TGACv1_499730_AA1590220	TRIAE_CS42_6BL_TGACv1_499730_AA1590220.1	High	ARR-B
TRIAE_CS42_6BL_TGACv1_499730_AA1590220	TRIAE_CS42_6BL_TGACv1_499730_AA1590220.2	High	ARR-B
TRIAE_CS42_6BL_TGACv1_500523_AA1605870	TRIAE_CS42_6BL_TGACv1_500523_AA1605870.1	High	ARR-B
TRIAE_CS42_6BL_TGACv1_502197_AA1623660	TRIAE_CS42_6BL_TGACv1_502197_AA1623660.1	High	ARR-B
TRIAE_CS42_6BL_TGACv1_502197_AA1623660	TRIAE_CS42_6BL_TGACv1_502197_AA1623660.2	High	ARR-B
TRIAE_CS42_6BS_TGACv1_513182_AA1633210	TRIAE_CS42_6BS_TGACv1_513182_AA1633210.1	High	ARR-B
TRIAE_CS42_6BS_TGACv1_513182_AA1633210	TRIAE_CS42_6BS_TGACv1_513182_AA1633210.2	High	ARR-B
TRIAE_CS42_6BS_TGACv1_513182_AA1633210	TRIAE_CS42_6BS_TGACv1_513182_AA1633210.3	High	ARR-B
TRIAE_CS42_6BS_TGACv1_513182_AA1633210	TRIAE_CS42_6BS_TGACv1_513182_AA1633210.4	High	ARR-B
TRIAE_CS42_6BS_TGACv1_513542_AA1644600	TRIAE_CS42_6BS_TGACv1_513542_AA1644600.1	High	ARR-B
TRIAE_CS42_6BS_TGACv1_513542_AA1644620	TRIAE_CS42_6BS_TGACv1_513542_AA1644620.1	High	ARR-B
TRIAE_CS42_6DL_TGACv1_526648_AA1689010	TRIAE_CS42_6DL_TGACv1_526648_AA1689010.1	High	ARR-B
TRIAE_CS42_6DL_TGACv1_526648_AA1689010	TRIAE_CS42_6DL_TGACv1_526648_AA1689010.2	High	ARR-B
TRIAE_CS42_6DL_TGACv1_526859_AA1693680	TRIAE_CS42_6DL_TGACv1_526859_AA1693680.1	High	ARR-B
TRIAE_CS42_6DS_TGACv1_542710_AA1728460	TRIAE_CS42_6DS_TGACv1_542710_AA1728460.2	High	ARR-B
TRIAE_CS42_6DS_TGACv1_542710_AA1728460	TRIAE_CS42_6DS_TGACv1_542710_AA1728460.3	High	ARR-B
TRIAE_CS42_6DS_TGACv1_542710_AA1728460	TRIAE_CS42_6DS_TGACv1_542710_AA1728460.5	High	ARR-B
TRIAE_CS42_6DS_TGACv1_542710_AA1728460	TRIAE_CS42_6DS_TGACv1_542710_AA1728460.6	High	ARR-B
TRIAE_CS42_6DS_TGACv1_543269_AA1737880	TRIAE_CS42_6DS_TGACv1_543269_AA1737880.1	High	ARR-B
TRIAE_CS42_6DS_TGACv1_543269_AA1737880	TRIAE_CS42_6DS_TGACv1_543269_AA1737880.2	High	ARR-B
TRIAE_CS42_6BL_TGACv1_499450_AA1582830	TRIAE_CS42_6BL_TGACv1_499450_AA1582830.1	High	G2-like
TRIAE_CS42_6BL_TGACv1_499662_AA1588540	TRIAE_CS42_6BL_TGACv1_499662_AA1588540.1	High	G2-like
TRIAE_CS42_6BL_TGACv1_499662_AA1588540	TRIAE_CS42_6BL_TGACv1_499662_AA1588540.2	High	G2-like
TRIAE_CS42_6BL_TGACv1_499881_AA1593940	TRIAE_CS42_6BL_TGACv1_499881_AA1593940.1	High	G2-like
TRIAE_CS42_6BL_TGACv1_499957_AA1595900	TRIAE_CS42_6BL_TGACv1_499957_AA1595900.1	High	G2-like
TRIAE_CS42_6BL_TGACv1_500523_AA1605880	TRIAE_CS42_6BL_TGACv1_500523_AA1605880.1	High	G2-like
TRIAE_CS42_6BL_TGACv1_501127_AA1613840	TRIAE_CS42_6BL_TGACv1_501127_AA1613840.1	High	G2-like
TRIAE_CS42_6BS_TGACv1_513181_AA1633190	TRIAE_CS42_6BS_TGACv1_513181_AA1633190.1	High	G2-like
TRIAE_CS42_6BS_TGACv1_513181_AA1633190	TRIAE_CS42_6BS_TGACv1_513181_AA1633190.2	High	G2-like
TRIAE_CS42_6BS_TGACv1_513181_AA1633190	TRIAE_CS42_6BS_TGACv1_513181_AA1633190.3	High	G2-like
TRIAE_CS42_6BS_TGACv1_513184_AA1633370	TRIAE_CS42_6BS_TGACv1_513184_AA1633370.1	High	G2-like
TRIAE_CS42_6BS_TGACv1_513582_AA1645130	TRIAE_CS42_6BS_TGACv1_513582_AA1645130.1	High	G2-like
TRIAE_CS42_6BS_TGACv1_514466_AA1660090	TRIAE_CS42_6BS_TGACv1_514466_AA1660090.1	High	G2-like
TRIAE_CS42_6BS_TGACv1_514466_AA1660090	TRIAE_CS42_6BS_TGACv1_514466_AA1660090.2	High	G2-like
TRIAE_CS42_6DL_TGACv1_526515_AA1686010	TRIAE_CS42_6DL_TGACv1_526515_AA1686010.1	High	G2-like
TRIAE_CS42_6DL_TGACv1_527465_AA1704440	TRIAE_CS42_6DL_TGACv1_527465_AA1704440.1	Low	G2-like
TRIAE_CS42_6DL_TGACv1_528632_AA1715290	TRIAE_CS42_6DL_TGACv1_528632_AA1715290.1	High	G2-like
TRIAE_CS42_6DL_TGACv1_528632_AA1715290	TRIAE_CS42_6DL_TGACv1_528632_AA1715290.2	High	G2-like
TRIAE_CS42_6DL_TGACv1_528632_AA1715290	TRIAE_CS42_6DL_TGACv1_528632_AA1715290.3	High	G2-like
TRIAE_CS42_6DS_TGACv1_542506_AA1722980	TRIAE_CS42_6DS_TGACv1_542506_AA1722980.1	High	G2-like
TRIAE_CS42_6DS_TGACv1_542543_AA1724010	TRIAE_CS42_6DS_TGACv1_542543_AA1724010.1	High	G2-like
TRIAE_CS42_6DS_TGACv1_542543_AA1724010	TRIAE_CS42_6DS_TGACv1_542543_AA1724010.2	High	G2-like
TRIAE_CS42_6DS_TGACv1_542626_AA1725710	TRIAE_CS42_6DS_TGACv1_542626_AA1725710.1	High	G2-like
TRIAE_CS42_6DS_TGACv1_542626_AA1725710	TRIAE_CS42_6DS_TGACv1_542626_AA1725710.2	High	G2-like
TRIAE_CS42_6DS_TGACv1_542626_AA1725710	TRIAE_CS42_6DS_TGACv1_542626_AA1725710.3	High	G2-like
TRIAE_CS42_6DS_TGACv1_542710_AA1728460	TRIAE_CS42_6DS_TGACv1_542710_AA1728460.1	High	G2-like
TRIAE_CS42_6DS_TGACv1_542710_AA1728460	TRIAE_CS42_6DS_TGACv1_542710_AA1728460.4	High	G2-like
TRIAE_CS42_6DS_TGACv1_543532_AA1741300	TRIAE_CS42_6DS_TGACv1_543532_AA1741300.1	High	G2-like
TRIAE_CS42_6DS_TGACv1_544069_AA1746290	TRIAE_CS42_6DS_TGACv1_544069_AA1746290.1	Low	G2-like
TRIAE_CS42_6BL_TGACv1_500233_AA1601850	TRIAE_CS42_6BL_TGACv1_500233_AA1601850.1	High	MIKC
TRIAE_CS42_6BL_TGACv1_500609_AA1607090	TRIAE_CS42_6BL_TGACv1_500609_AA1607090.1	High	MIKC
TRIAE_CS42_6BL_TGACv1_500914_AA1611650	TRIAE_CS42_6BL_TGACv1_500914_AA1611650.2	High	MIKC
TRIAE_CS42_6BS_TGACv1_513226_AA1635080	TRIAE_CS42_6BS_TGACv1_513226_AA1635080.1	High	MIKC
TRIAE_CS42_6BS_TGACv1_514454_AA1659920	TRIAE_CS42_6BS_TGACv1_514454_AA1659920.1	High	MIKC
TRIAE_CS42_6BS_TGACv1_514879_AA1665310	TRIAE_CS42_6BS_TGACv1_514879_AA1665310.1	High	MIKC
TRIAE_CS42_6BS_TGACv1_514879_AA1665310	TRIAE_CS42_6BS_TGACv1_514879_AA1665310.2	High	MIKC
TRIAE_CS42_6DL_TGACv1_526443_AA1683650	TRIAE_CS42_6DL_TGACv1_526443_AA1683650.1	High	MIKC
TRIAE_CS42_6DL_TGACv1_526443_AA1683650	TRIAE_CS42_6DL_TGACv1_526443_AA1683650.2	High	MIKC
TRIAE_CS42_6DL_TGACv1_526443_AA1683650	TRIAE_CS42_6DL_TGACv1_526443_AA1683650.3	High	MIKC
TRIAE_CS42_6DL_TGACv1_527648_AA1706840	TRIAE_CS42_6DL_TGACv1_527648_AA1706840.1	High	MIKC
TRIAE_CS42_6DL_TGACv1_527898_AA1709630	TRIAE_CS42_6DL_TGACv1_527898_AA1709630.1	High	MIKC
TRIAE_CS42_6DL_TGACv1_527898_AA1709630	TRIAE_CS42_6DL_TGACv1_527898_AA1709630.2	High	MIKC
TRIAE_CS42_6DS_TGACv1_542755_AA1729670	TRIAE_CS42_6DS_TGACv1_542755_AA1729670.1	High	MIKC
TRIAE_CS42_6DS_TGACv1_543151_AA1736280	TRIAE_CS42_6DS_TGACv1_543151_AA1736280.1	Low	MIKC
TRIAE_CS42_6DS_TGACv1_544258_AA1747470	TRIAE_CS42_6DS_TGACv1_544258_AA1747470.1	High	MIKC
TRIAE_CS42_6BL_TGACv1_499533_AA1585150	TRIAE_CS42_6BL_TGACv1_499533_AA1585150.1	Low	M-type
TRIAE_CS42_6BL_TGACv1_499552_AA1585790	TRIAE_CS42_6BL_TGACv1_499552_AA1585790.1	Low	M-type
TRIAE_CS42_6BL_TGACv1_499742_AA1590720	TRIAE_CS42_6BL_TGACv1_499742_AA1590720.1	Low	M-type
TRIAE_CS42_6BL_TGACv1_499955_AA1595830	TRIAE_CS42_6BL_TGACv1_499955_AA1595830.1	Low	M-type
TRIAE_CS42_6BL_TGACv1_501308_AA1615870	TRIAE_CS42_6BL_TGACv1_501308_AA1615870.1	Low	M-type
TRIAE_CS42_6BL_TGACv1_509682_AA1629810	TRIAE_CS42_6BL_TGACv1_509682_AA1629810.1	Low	M-type
TRIAE_CS42_6BS_TGACv1_513929_AA1652320	TRIAE_CS42_6BS_TGACv1_513929_AA1652320.1	Low	M-type
TRIAE_CS42_6BS_TGACv1_514077_AA1654760	TRIAE_CS42_6BS_TGACv1_514077_AA1654760.1	High	M-type
TRIAE_CS42_6BS_TGACv1_514091_AA1654930	TRIAE_CS42_6BS_TGACv1_514091_AA1654930.1	Low	M-type
TRIAE_CS42_6BS_TGACv1_515641_AA1671480	TRIAE_CS42_6BS_TGACv1_515641_AA1671480.1	Low	M-type
TRIAE_CS42_6BS_TGACv1_517242_AA1676920	TRIAE_CS42_6BS_TGACv1_517242_AA1676920.1	Low	M-type
TRIAE_CS42_6BS_TGACv1_522288_AA1678160	TRIAE_CS42_6BS_TGACv1_522288_AA1678160.1	Low	M-type
TRIAE_CS42_6DL_TGACv1_527556_AA1705650	TRIAE_CS42_6DL_TGACv1_527556_AA1705650.1	Low	M-type
TRIAE_CS42_6DL_TGACv1_527788_AA1708570	TRIAE_CS42_6DL_TGACv1_527788_AA1708570.1	Low	M-type
TRIAE_CS42_6DL_TGACv1_528492_AA1714560	TRIAE_CS42_6DL_TGACv1_528492_AA1714560.1	Low	M-type
TRIAE_CS42_6DL_TGACv1_528768_AA1716130	TRIAE_CS42_6DL_TGACv1_528768_AA1716130.1	Low	M-type
TRIAE_CS42_6DL_TGACv1_529777_AA1718890	TRIAE_CS42_6DL_TGACv1_529777_AA1718890.1	High	M-type
TRIAE_CS42_6DS_TGACv1_542504_AA1722790	TRIAE_CS42_6DS_TGACv1_542504_AA1722790.1	High	M-type
TRIAE_CS42_6DS_TGACv1_542504_AA1722870	TRIAE_CS42_6DS_TGACv1_542504_AA1722870.1	Low	M-type
TRIAE_CS42_6DS_TGACv1_542504_AA1722890	TRIAE_CS42_6DS_TGACv1_542504_AA1722890.1	Low	M-type
TRIAE_CS42_6DS_TGACv1_542694_AA1728080	TRIAE_CS42_6DS_TGACv1_542694_AA1728080.1	High	M-type
TRIAE_CS42_7AL_TGACv1_556127_AA1756490	TRIAE_CS42_7AL_TGACv1_556127_AA1756490.1	Low	M-type
TRIAE_CS42_7AL_TGACv1_556127_AA1756530	TRIAE_CS42_7AL_TGACv1_556127_AA1756530.1	Low	M-type
TRIAE_CS42_7AL_TGACv1_556156_AA1757170	TRIAE_CS42_7AL_TGACv1_556156_AA1757170.1	Low	M-type
TRIAE_CS42_6BL_TGACv1_500117_AA1599360	TRIAE_CS42_6BL_TGACv1_500117_AA1599360.1	High	GRF
TRIAE_CS42_6BL_TGACv1_500117_AA1599360	TRIAE_CS42_6BL_TGACv1_500117_AA1599360.2	High	GRF
TRIAE_CS42_6BL_TGACv1_500422_AA1604330	TRIAE_CS42_6BL_TGACv1_500422_AA1604330.1	High	GRF
TRIAE_CS42_6BL_TGACv1_501267_AA1615480	TRIAE_CS42_6BL_TGACv1_501267_AA1615480.1	High	GRF
TRIAE_CS42_6DL_TGACv1_526887_AA1694360	TRIAE_CS42_6DL_TGACv1_526887_AA1694360.1	High	GRF
TRIAE_CS42_6DL_TGACv1_527403_AA1703400	TRIAE_CS42_6DL_TGACv1_527403_AA1703400.1	High	GRF
TRIAE_CS42_6DL_TGACv1_527461_AA1704370	TRIAE_CS42_6DL_TGACv1_527461_AA1704370.1	High	GRF
TRIAE_CS42_6DS_TGACv1_544097_AA1746450	TRIAE_CS42_6DS_TGACv1_544097_AA1746450.1	Low	GRF
TRIAE_CS42_6BL_TGACv1_500732_AA1609000	TRIAE_CS42_6BL_TGACv1_500732_AA1609000.1	High	HB-other
TRIAE_CS42_6BL_TGACv1_500851_AA1610730	TRIAE_CS42_6BL_TGACv1_500851_AA1610730.1	High	HB-other
TRIAE_CS42_6BL_TGACv1_500851_AA1610740	TRIAE_CS42_6BL_TGACv1_500851_AA1610740.1	High	HB-other
TRIAE_CS42_6BL_TGACv1_500851_AA1610740	TRIAE_CS42_6BL_TGACv1_500851_AA1610740.2	High	HB-other
TRIAE_CS42_6BS_TGACv1_513289_AA1637630	TRIAE_CS42_6BS_TGACv1_513289_AA1637630.1	High	HB-other
TRIAE_CS42_6BS_TGACv1_513289_AA1637640	TRIAE_CS42_6BS_TGACv1_513289_AA1637640.1	High	HB-other
TRIAE_CS42_6BS_TGACv1_513289_AA1637650	TRIAE_CS42_6BS_TGACv1_513289_AA1637650.1	High	HB-other
TRIAE_CS42_6BS_TGACv1_515568_AA1671040	TRIAE_CS42_6BS_TGACv1_515568_AA1671040.1	High	HB-other
TRIAE_CS42_6DL_TGACv1_526481_AA1684760	TRIAE_CS42_6DL_TGACv1_526481_AA1684760.1	High	HB-other
TRIAE_CS42_6DL_TGACv1_526626_AA1688420	TRIAE_CS42_6DL_TGACv1_526626_AA1688420.1	Low	HB-other
TRIAE_CS42_6DL_TGACv1_526842_AA1693150	TRIAE_CS42_6DL_TGACv1_526842_AA1693150.1	High	HB-other
TRIAE_CS42_6DS_TGACv1_543911_AA1745210	TRIAE_CS42_6DS_TGACv1_543911_AA1745210.1	Low	HB-other
TRIAE_CS42_6DL_TGACv1_528001_AA1710590	TRIAE_CS42_6DL_TGACv1_528001_AA1710590.1	High	HD-ZIP
TRIAE_CS42_6BL_TGACv1_499874_AA1593710	TRIAE_CS42_6BL_TGACv1_499874_AA1593710.2	High	HD-ZIP
TRIAE_CS42_6DL_TGACv1_528001_AA1710590	TRIAE_CS42_6DL_TGACv1_528001_AA1710590.2	High	HD-ZIP
TRIAE_CS42_6BL_TGACv1_499874_AA1593710	TRIAE_CS42_6BL_TGACv1_499874_AA1593710.1	High	HD-ZIP
TRIAE_CS42_6DL_TGACv1_528001_AA1710590	TRIAE_CS42_6DL_TGACv1_528001_AA1710590.3	High	HD-ZIP
TRIAE_CS42_6DL_TGACv1_526953_AA1695920	TRIAE_CS42_6DL_TGACv1_526953_AA1695920.1	High	HD-ZIP
TRIAE_CS42_6BL_TGACv1_501075_AA1613210	TRIAE_CS42_6BL_TGACv1_501075_AA1613210.1	High	HD-ZIP
TRIAE_CS42_6DS_TGACv1_543751_AA1743810	TRIAE_CS42_6DS_TGACv1_543751_AA1743810.1	High	HD-ZIP
TRIAE_CS42_6DS_TGACv1_543751_AA1743790	TRIAE_CS42_6DS_TGACv1_543751_AA1743790.1	High	HD-ZIP
TRIAE_CS42_6BS_TGACv1_515943_AA1673050	TRIAE_CS42_6BS_TGACv1_515943_AA1673050.1	High	HD-ZIP
TRIAE_CS42_6BS_TGACv1_513254_AA1636250	TRIAE_CS42_6BS_TGACv1_513254_AA1636250.1	High	HD-ZIP
TRIAE_CS42_6DS_TGACv1_543978_AA1745680	TRIAE_CS42_6DS_TGACv1_543978_AA1745680.1	High	HD-ZIP
TRIAE_CS42_6BS_TGACv1_513772_AA1649200	TRIAE_CS42_6BS_TGACv1_513772_AA1649200.1	Low	HD-ZIP
TRIAE_CS42_6DS_TGACv1_542636_AA1725940	TRIAE_CS42_6DS_TGACv1_542636_AA1725940.1	High	TALE
TRIAE_CS42_6BS_TGACv1_513743_AA1648480	TRIAE_CS42_6BS_TGACv1_513743_AA1648480.2	High	TALE
TRIAE_CS42_6DS_TGACv1_542636_AA1725940	TRIAE_CS42_6DS_TGACv1_542636_AA1725940.2	High	TALE
TRIAE_CS42_6BS_TGACv1_513743_AA1648480	TRIAE_CS42_6BS_TGACv1_513743_AA1648480.1	High	TALE
TRIAE_CS42_6DL_TGACv1_526718_AA1690420	TRIAE_CS42_6DL_TGACv1_526718_AA1690420.1	High	HD-ZIP
TRIAE_CS42_6BL_TGACv1_501429_AA1617340	TRIAE_CS42_6BL_TGACv1_501429_AA1617340.5	High	HD-ZIP
TRIAE_CS42_6BL_TGACv1_501429_AA1617340	TRIAE_CS42_6BL_TGACv1_501429_AA1617340.1	High	HD-ZIP
TRIAE_CS42_6BL_TGACv1_501429_AA1617340	TRIAE_CS42_6BL_TGACv1_501429_AA1617340.3	High	HD-ZIP
TRIAE_CS42_6BL_TGACv1_501429_AA1617340	TRIAE_CS42_6BL_TGACv1_501429_AA1617340.2	High	HD-ZIP
TRIAE_CS42_6DL_TGACv1_526718_AA1690420	TRIAE_CS42_6DL_TGACv1_526718_AA1690420.2	High	HD-ZIP
TRIAE_CS42_6BS_TGACv1_514542_AA1661200	TRIAE_CS42_6BS_TGACv1_514542_AA1661200.6	High	HB-PHD
TRIAE_CS42_6BS_TGACv1_514542_AA1661200	TRIAE_CS42_6BS_TGACv1_514542_AA1661200.4	High	HB-PHD
TRIAE_CS42_6BS_TGACv1_514542_AA1661200	TRIAE_CS42_6BS_TGACv1_514542_AA1661200.8	High	HB-PHD
TRIAE_CS42_6BS_TGACv1_514542_AA1661200	TRIAE_CS42_6BS_TGACv1_514542_AA1661200.2	High	HB-PHD
TRIAE_CS42_6BS_TGACv1_514542_AA1661200	TRIAE_CS42_6BS_TGACv1_514542_AA1661200.5	High	HB-PHD
TRIAE_CS42_6BS_TGACv1_514542_AA1661200	TRIAE_CS42_6BS_TGACv1_514542_AA1661200.3	High	HB-PHD
TRIAE_CS42_6BS_TGACv1_514542_AA1661200	TRIAE_CS42_6BS_TGACv1_514542_AA1661200.7	High	HB-PHD
TRIAE_CS42_6BS_TGACv1_514542_AA1661200	TRIAE_CS42_6BS_TGACv1_514542_AA1661200.1	High	HB-PHD
TRIAE_CS42_6BL_TGACv1_499445_AA1582690	TRIAE_CS42_6BL_TGACv1_499445_AA1582690.1	High	C2H2
TRIAE_CS42_6BL_TGACv1_499447_AA1582740	TRIAE_CS42_6BL_TGACv1_499447_AA1582740.1	High	C2H2
TRIAE_CS42_6BL_TGACv1_499559_AA1586150	TRIAE_CS42_6BL_TGACv1_499559_AA1586150.1	High	C3H
TRIAE_CS42_6BL_TGACv1_499559_AA1586150	TRIAE_CS42_6BL_TGACv1_499559_AA1586150.2	High	C3H
TRIAE_CS42_6BL_TGACv1_499796_AA1591980	TRIAE_CS42_6BL_TGACv1_499796_AA1591980.1	High	C2H2
TRIAE_CS42_6BL_TGACv1_500678_AA1608350	TRIAE_CS42_6BL_TGACv1_500678_AA1608350.1	Low	C2H2
TRIAE_CS42_6BL_TGACv1_500701_AA1608540	TRIAE_CS42_6BL_TGACv1_500701_AA1608540.1	High	C2H2
TRIAE_CS42_6BL_TGACv1_501027_AA1612710	TRIAE_CS42_6BL_TGACv1_501027_AA1612710.1	High	C3H
TRIAE_CS42_6BL_TGACv1_501027_AA1612710	TRIAE_CS42_6BL_TGACv1_501027_AA1612710.2	High	C3H
TRIAE_CS42_6BL_TGACv1_501027_AA1612710	TRIAE_CS42_6BL_TGACv1_501027_AA1612710.3	High	C3H
TRIAE_CS42_6BL_TGACv1_501197_AA1614840	TRIAE_CS42_6BL_TGACv1_501197_AA1614840.1	High	C3H
TRIAE_CS42_6BL_TGACv1_501197_AA1614840	TRIAE_CS42_6BL_TGACv1_501197_AA1614840.2	High	C3H
TRIAE_CS42_6BS_TGACv1_513126_AA1630770	TRIAE_CS42_6BS_TGACv1_513126_AA1630770.1	High	C2H2
TRIAE_CS42_6BS_TGACv1_513178_AA1633040	TRIAE_CS42_6BS_TGACv1_513178_AA1633040.1	High	C2H2
TRIAE_CS42_6BS_TGACv1_513263_AA1636510	TRIAE_CS42_6BS_TGACv1_513263_AA1636510.1	High	C2H2
TRIAE_CS42_6BS_TGACv1_513446_AA1641850	TRIAE_CS42_6BS_TGACv1_513446_AA1641850.1	High	C3H
TRIAE_CS42_6BS_TGACv1_513736_AA1648240	TRIAE_CS42_6BS_TGACv1_513736_AA1648240.1	High	C2H2
TRIAE_CS42_6BS_TGACv1_514473_AA1660230	TRIAE_CS42_6BS_TGACv1_514473_AA1660230.1	High	C3H
TRIAE_CS42_6BS_TGACv1_515182_AA1667890	TRIAE_CS42_6BS_TGACv1_515182_AA1667890.1	Low	C2H2
TRIAE_CS42_6BS_TGACv1_515182_AA1667910	TRIAE_CS42_6BS_TGACv1_515182_AA1667910.1	Low	C2H2
TRIAE_CS42_6BS_TGACv1_516642_AA1675860	TRIAE_CS42_6BS_TGACv1_516642_AA1675860.1	High	C3H
TRIAE_CS42_6DL_TGACv1_526363_AA1680790	TRIAE_CS42_6DL_TGACv1_526363_AA1680790.1	High	C3H
TRIAE_CS42_6DL_TGACv1_526525_AA1686150	TRIAE_CS42_6DL_TGACv1_526525_AA1686150.1	High	C2H2
TRIAE_CS42_6DL_TGACv1_526525_AA1686150	TRIAE_CS42_6DL_TGACv1_526525_AA1686150.2	High	C2H2
TRIAE_CS42_6DL_TGACv1_526525_AA1686150	TRIAE_CS42_6DL_TGACv1_526525_AA1686150.3	High	C2H2
TRIAE_CS42_6DL_TGACv1_526554_AA1686970	TRIAE_CS42_6DL_TGACv1_526554_AA1686970.1	High	C2H2
TRIAE_CS42_6DL_TGACv1_526618_AA1688360	TRIAE_CS42_6DL_TGACv1_526618_AA1688360.1	High	C2H2
TRIAE_CS42_6DL_TGACv1_526749_AA1691370	TRIAE_CS42_6DL_TGACv1_526749_AA1691370.1	Low	C2H2
TRIAE_CS42_6DL_TGACv1_526865_AA1693900	TRIAE_CS42_6DL_TGACv1_526865_AA1693900.1	High	C2H2
TRIAE_CS42_6DL_TGACv1_526865_AA1693900	TRIAE_CS42_6DL_TGACv1_526865_AA1693900.2	High	C2H2
TRIAE_CS42_6DL_TGACv1_526865_AA1693900	TRIAE_CS42_6DL_TGACv1_526865_AA1693900.3	High	C2H2
TRIAE_CS42_6DL_TGACv1_527081_AA1698240	TRIAE_CS42_6DL_TGACv1_527081_AA1698240.1	High	C3H
TRIAE_CS42_6DL_TGACv1_527081_AA1698240	TRIAE_CS42_6DL_TGACv1_527081_AA1698240.2	High	C3H
TRIAE_CS42_6DL_TGACv1_527230_AA1700850	TRIAE_CS42_6DL_TGACv1_527230_AA1700850.1	High	C2H2
TRIAE_CS42_6DL_TGACv1_527756_AA1708290	TRIAE_CS42_6DL_TGACv1_527756_AA1708290.1	High	C2H2
TRIAE_CS42_6DL_TGACv1_528201_AA1712410	TRIAE_CS42_6DL_TGACv1_528201_AA1712410.1	High	C3H
TRIAE_CS42_6DS_TGACv1_542620_AA1725530	TRIAE_CS42_6DS_TGACv1_542620_AA1725530.1	High	C2H2
TRIAE_CS42_6DS_TGACv1_542719_AA1728830	TRIAE_CS42_6DS_TGACv1_542719_AA1728830.1	Low	C2H2
TRIAE_CS42_6DS_TGACv1_542935_AA1732890	TRIAE_CS42_6DS_TGACv1_542935_AA1732890.1	High	C2H2
TRIAE_CS42_6DS_TGACv1_543230_AA1737250	TRIAE_CS42_6DS_TGACv1_543230_AA1737250.1	High	C2H2
TRIAE_CS42_6DS_TGACv1_543240_AA1737350	TRIAE_CS42_6DS_TGACv1_543240_AA1737350.1	High	C3H
TRIAE_CS42_6DS_TGACv1_543240_AA1737360	TRIAE_CS42_6DS_TGACv1_543240_AA1737360.1	High	C3H
TRIAE_CS42_6DS_TGACv1_543240_AA1737370	TRIAE_CS42_6DS_TGACv1_543240_AA1737370.1	High	C3H
TRIAE_CS42_6DS_TGACv1_543679_AA1742960	TRIAE_CS42_6DS_TGACv1_543679_AA1742960.1	High	C2H2
TRIAE_CS42_6DS_TGACv1_543686_AA1743100	TRIAE_CS42_6DS_TGACv1_543686_AA1743100.1	High	C3H
TRIAE_CS42_6DS_TGACv1_543686_AA1743110	TRIAE_CS42_6DS_TGACv1_543686_AA1743110.1	High	C3H
TRIAE_CS42_7AL_TGACv1_556094_AA1755240	TRIAE_CS42_7AL_TGACv1_556094_AA1755240.1	High	C2H2
TRIAE_CS42_7AL_TGACv1_556094_AA1755250	TRIAE_CS42_7AL_TGACv1_556094_AA1755250.1	Low	C2H2
TRIAE_CS42_7AL_TGACv1_556094_AA1755260	TRIAE_CS42_7AL_TGACv1_556094_AA1755260.1	Low	C2H2
TRIAE_CS42_6BL_TGACv1_499756_AA1591050	TRIAE_CS42_6BL_TGACv1_499756_AA1591050.1	High	MYB
TRIAE_CS42_6BL_TGACv1_499776_AA1591460	TRIAE_CS42_6BL_TGACv1_499776_AA1591460.1	High	MYB
TRIAE_CS42_6BL_TGACv1_499853_AA1593300	TRIAE_CS42_6BL_TGACv1_499853_AA1593300.1	High	MYB
TRIAE_CS42_6BL_TGACv1_500449_AA1604920	TRIAE_CS42_6BL_TGACv1_500449_AA1604920.1	High	MYB
TRIAE_CS42_6BL_TGACv1_500668_AA1608240	TRIAE_CS42_6BL_TGACv1_500668_AA1608240.1	High	MYB
TRIAE_CS42_6BL_TGACv1_501153_AA1614190	TRIAE_CS42_6BL_TGACv1_501153_AA1614190.1	High	MYB
TRIAE_CS42_6BL_TGACv1_501521_AA1618370	TRIAE_CS42_6BL_TGACv1_501521_AA1618370.1	High	MYB
TRIAE_CS42_6BL_TGACv1_501605_AA1619280	TRIAE_CS42_6BL_TGACv1_501605_AA1619280.1	High	MYB
TRIAE_CS42_6BL_TGACv1_501605_AA1619280	TRIAE_CS42_6BL_TGACv1_501605_AA1619280.2	High	MYB
TRIAE_CS42_6BL_TGACv1_501656_AA1619660	TRIAE_CS42_6BL_TGACv1_501656_AA1619660.1	High	MYB
TRIAE_CS42_6BL_TGACv1_501698_AA1620020	TRIAE_CS42_6BL_TGACv1_501698_AA1620020.1	High	MYB
TRIAE_CS42_6BS_TGACv1_513228_AA1635240	TRIAE_CS42_6BS_TGACv1_513228_AA1635240.1	High	MYB
TRIAE_CS42_6BS_TGACv1_513372_AA1639220	TRIAE_CS42_6BS_TGACv1_513372_AA1639220.1	High	MYB
TRIAE_CS42_6BS_TGACv1_513472_AA1642620	TRIAE_CS42_6BS_TGACv1_513472_AA1642620.1	Low	MYB
TRIAE_CS42_6DL_TGACv1_526309_AA1679130	TRIAE_CS42_6DL_TGACv1_526309_AA1679130.1	High	MYB
TRIAE_CS42_6DL_TGACv1_526371_AA1681140	TRIAE_CS42_6DL_TGACv1_526371_AA1681140.1	High	MYB
TRIAE_CS42_6DL_TGACv1_526555_AA1687010	TRIAE_CS42_6DL_TGACv1_526555_AA1687010.1	High	MYB
TRIAE_CS42_6DL_TGACv1_526690_AA1689970	TRIAE_CS42_6DL_TGACv1_526690_AA1689970.1	High	MYB
TRIAE_CS42_6DL_TGACv1_526726_AA1690640	TRIAE_CS42_6DL_TGACv1_526726_AA1690640.1	High	MYB
TRIAE_CS42_6DL_TGACv1_526829_AA1692860	TRIAE_CS42_6DL_TGACv1_526829_AA1692860.1	High	MYB
TRIAE_CS42_6DL_TGACv1_527325_AA1702290	TRIAE_CS42_6DL_TGACv1_527325_AA1702290.1	High	MYB
TRIAE_CS42_6DL_TGACv1_527394_AA1703260	TRIAE_CS42_6DL_TGACv1_527394_AA1703260.1	High	MYB
TRIAE_CS42_6DL_TGACv1_527629_AA1706560	TRIAE_CS42_6DL_TGACv1_527629_AA1706560.1	High	MYB
TRIAE_CS42_6DL_TGACv1_528054_AA1711180	TRIAE_CS42_6DL_TGACv1_528054_AA1711180.1	Low	MYB
TRIAE_CS42_6DL_TGACv1_528208_AA1712510	TRIAE_CS42_6DL_TGACv1_528208_AA1712510.1	High	MYB
TRIAE_CS42_6DL_TGACv1_528208_AA1712510	TRIAE_CS42_6DL_TGACv1_528208_AA1712510.2	High	MYB
TRIAE_CS42_6DL_TGACv1_528764_AA1716110	TRIAE_CS42_6DL_TGACv1_528764_AA1716110.1	High	MYB
TRIAE_CS42_6DS_TGACv1_543100_AA1735360	TRIAE_CS42_6DS_TGACv1_543100_AA1735360.1	High	MYB
TRIAE_CS42_6DS_TGACv1_543879_AA1744870	TRIAE_CS42_6DS_TGACv1_543879_AA1744870.1	High	MYB
TRIAE_CS42_6DS_TGACv1_543930_AA1745410	TRIAE_CS42_6DS_TGACv1_543930_AA1745410.1	High	MYB
TRIAE_CS42_6BL_TGACv1_499615_AA1587540	TRIAE_CS42_6BL_TGACv1_499615_AA1587540.1	High	MYB_related
TRIAE_CS42_6BL_TGACv1_499615_AA1587540	TRIAE_CS42_6BL_TGACv1_499615_AA1587540.2	High	MYB_related
TRIAE_CS42_6BL_TGACv1_499615_AA1587540	TRIAE_CS42_6BL_TGACv1_499615_AA1587540.3	High	MYB_related
TRIAE_CS42_6BL_TGACv1_499615_AA1587540	TRIAE_CS42_6BL_TGACv1_499615_AA1587540.4	High	MYB_related
TRIAE_CS42_6BL_TGACv1_499615_AA1587540	TRIAE_CS42_6BL_TGACv1_499615_AA1587540.5	High	MYB_related
TRIAE_CS42_6BL_TGACv1_499853_AA1593300	TRIAE_CS42_6BL_TGACv1_499853_AA1593300.2	High	MYB_related
TRIAE_CS42_6BL_TGACv1_499922_AA1594970	TRIAE_CS42_6BL_TGACv1_499922_AA1594970.1	High	MYB_related
TRIAE_CS42_6BL_TGACv1_501073_AA1613180	TRIAE_CS42_6BL_TGACv1_501073_AA1613180.1	High	MYB_related
TRIAE_CS42_6BL_TGACv1_501073_AA1613180	TRIAE_CS42_6BL_TGACv1_501073_AA1613180.2	High	MYB_related
TRIAE_CS42_6BL_TGACv1_501662_AA1619740	TRIAE_CS42_6BL_TGACv1_501662_AA1619740.1	High	MYB_related
TRIAE_CS42_6BL_TGACv1_502708_AA1626110	TRIAE_CS42_6BL_TGACv1_502708_AA1626110.1	High	MYB_related
TRIAE_CS42_6BL_TGACv1_502708_AA1626110	TRIAE_CS42_6BL_TGACv1_502708_AA1626110.2	High	MYB_related
TRIAE_CS42_6BL_TGACv1_502708_AA1626110	TRIAE_CS42_6BL_TGACv1_502708_AA1626110.3	High	MYB_related
TRIAE_CS42_6BL_TGACv1_502708_AA1626110	TRIAE_CS42_6BL_TGACv1_502708_AA1626110.4	High	MYB_related
TRIAE_CS42_6DL_TGACv1_526455_AA1684190	TRIAE_CS42_6DL_TGACv1_526455_AA1684190.1	High	MYB_related
TRIAE_CS42_6DL_TGACv1_526612_AA1688260	TRIAE_CS42_6DL_TGACv1_526612_AA1688260.1	Low	MYB_related
TRIAE_CS42_6DL_TGACv1_526630_AA1688580	TRIAE_CS42_6DL_TGACv1_526630_AA1688580.1	High	MYB_related
TRIAE_CS42_6DL_TGACv1_526630_AA1688580	TRIAE_CS42_6DL_TGACv1_526630_AA1688580.2	High	MYB_related
TRIAE_CS42_6DL_TGACv1_526630_AA1688580	TRIAE_CS42_6DL_TGACv1_526630_AA1688580.3	High	MYB_related
TRIAE_CS42_6DL_TGACv1_526709_AA1690300	TRIAE_CS42_6DL_TGACv1_526709_AA1690300.1	High	MYB_related
TRIAE_CS42_6DL_TGACv1_526709_AA1690300	TRIAE_CS42_6DL_TGACv1_526709_AA1690300.2	High	MYB_related
TRIAE_CS42_6DL_TGACv1_526913_AA1694890	TRIAE_CS42_6DL_TGACv1_526913_AA1694890.1	High	MYB_related
TRIAE_CS42_6DL_TGACv1_526913_AA1694890	TRIAE_CS42_6DL_TGACv1_526913_AA1694890.2	High	MYB_related
TRIAE_CS42_6DL_TGACv1_527980_AA1710400	TRIAE_CS42_6DL_TGACv1_527980_AA1710400.1	High	MYB_related
TRIAE_CS42_6DL_TGACv1_527980_AA1710400	TRIAE_CS42_6DL_TGACv1_527980_AA1710400.2	High	MYB_related
TRIAE_CS42_6DL_TGACv1_528680_AA1715550	TRIAE_CS42_6DL_TGACv1_528680_AA1715550.1	High	MYB_related
TRIAE_CS42_6DL_TGACv1_528680_AA1715550	TRIAE_CS42_6DL_TGACv1_528680_AA1715550.2	High	MYB_related
TRIAE_CS42_6DL_TGACv1_528680_AA1715550	TRIAE_CS42_6DL_TGACv1_528680_AA1715550.3	High	MYB_related
TRIAE_CS42_6DL_TGACv1_528680_AA1715550	TRIAE_CS42_6DL_TGACv1_528680_AA1715550.4	High	MYB_related
TRIAE_CS42_1DL_TGACv1_063924_AA0231770	TRIAE_CS42_1DL_TGACv1_063924_AA0231770.1	High	RAV
TRIAE_CS42_1DL_TGACv1_061710_AA0202080	TRIAE_CS42_1DL_TGACv1_061710_AA0202080.1	High	RAV
TRIAE_CS42_1DL_TGACv1_061710_AA0202090	TRIAE_CS42_1DL_TGACv1_061710_AA0202090.1	High	RAV
TRIAE_CS42_1DL_TGACv1_063625_AA0229300	TRIAE_CS42_1DL_TGACv1_063625_AA0229300.1	High	RAV
TRIAE_CS42_1DL_TGACv1_061067_AA0183920	TRIAE_CS42_1DL_TGACv1_061067_AA0183920.1	High	YABBY
TRIAE_CS42_1DL_TGACv1_061103_AA0185430	TRIAE_CS42_1DL_TGACv1_061103_AA0185430.1	High	WRKY
TRIAE_CS42_1DL_TGACv1_061111_AA0185740	TRIAE_CS42_1DL_TGACv1_061111_AA0185740.1	High	WRKY
TRIAE_CS42_1DL_TGACv1_061149_AA0187120	TRIAE_CS42_1DL_TGACv1_061149_AA0187120.1	Low	FAR1
TRIAE_CS42_1DL_TGACv1_061149_AA0187120	TRIAE_CS42_1DL_TGACv1_061149_AA0187120.2	Low	FAR1
TRIAE_CS42_1DL_TGACv1_061159_AA0187490	TRIAE_CS42_1DL_TGACv1_061159_AA0187490.1	High	WRKY
TRIAE_CS42_1DL_TGACv1_061165_AA0187630	TRIAE_CS42_1DL_TGACv1_061165_AA0187630.1	High	Trihelix
TRIAE_CS42_1DL_TGACv1_061165_AA0187630	TRIAE_CS42_1DL_TGACv1_061165_AA0187630.2	High	Trihelix
TRIAE_CS42_1DL_TGACv1_061165_AA0187630	TRIAE_CS42_1DL_TGACv1_061165_AA0187630.3	High	Trihelix
TRIAE_CS42_1DL_TGACv1_061209_AA0188920	TRIAE_CS42_1DL_TGACv1_061209_AA0188920.1	Low	FAR1
TRIAE_CS42_1DL_TGACv1_061220_AA0189160	TRIAE_CS42_1DL_TGACv1_061220_AA0189160.1	High	bZIP
TRIAE_CS42_1DL_TGACv1_061220_AA0189160	TRIAE_CS42_1DL_TGACv1_061220_AA0189160.2	High	bZIP
TRIAE_CS42_1DL_TGACv1_061247_AA0189940	TRIAE_CS42_1DL_TGACv1_061247_AA0189940.1	High	WRKY
TRIAE_CS42_1DL_TGACv1_061247_AA0189950	TRIAE_CS42_1DL_TGACv1_061247_AA0189950.1	High	WRKY
TRIAE_CS42_1DL_TGACv1_061263_AA0190410	TRIAE_CS42_1DL_TGACv1_061263_AA0190410.1	High	WRKY
TRIAE_CS42_1DL_TGACv1_061263_AA0190450	TRIAE_CS42_1DL_TGACv1_061263_AA0190450.1	High	WRKY
TRIAE_CS42_1DL_TGACv1_061263_AA0190460	TRIAE_CS42_1DL_TGACv1_061263_AA0190460.1	High	WRKY
TRIAE_CS42_1DL_TGACv1_061270_AA0190640	TRIAE_CS42_1DL_TGACv1_061270_AA0190640.1	High	Trihelix
TRIAE_CS42_1DL_TGACv1_061270_AA0190640	TRIAE_CS42_1DL_TGACv1_061270_AA0190640.2	High	Trihelix
TRIAE_CS42_1DL_TGACv1_061270_AA0190640	TRIAE_CS42_1DL_TGACv1_061270_AA0190640.3	High	Trihelix
TRIAE_CS42_1DL_TGACv1_061270_AA0190640	TRIAE_CS42_1DL_TGACv1_061270_AA0190640.4	High	Trihelix
TRIAE_CS42_1DL_TGACv1_061276_AA0190860	TRIAE_CS42_1DL_TGACv1_061276_AA0190860.1	Low	FAR1
TRIAE_CS42_1DL_TGACv1_061299_AA0191710	TRIAE_CS42_1DL_TGACv1_061299_AA0191710.1	High	Dof
TRIAE_CS42_1DL_TGACv1_061306_AA0191970	TRIAE_CS42_1DL_TGACv1_061306_AA0191970.1	Low	Trihelix
TRIAE_CS42_1DL_TGACv1_061339_AA0192600	TRIAE_CS42_1DL_TGACv1_061339_AA0192600.1	High	GATA
TRIAE_CS42_1DL_TGACv1_061383_AA0193800	TRIAE_CS42_1DL_TGACv1_061383_AA0193800.1	High	HSF
TRIAE_CS42_1DL_TGACv1_061395_AA0194070	TRIAE_CS42_1DL_TGACv1_061395_AA0194070.1	High	NAC
TRIAE_CS42_1DL_TGACv1_061434_AA0195250	TRIAE_CS42_1DL_TGACv1_061434_AA0195250.1	High	WRKY
TRIAE_CS42_1DL_TGACv1_061442_AA0195380	TRIAE_CS42_1DL_TGACv1_061442_AA0195380.1	High	NAC
TRIAE_CS42_1DL_TGACv1_061459_AA0195880	TRIAE_CS42_1DL_TGACv1_061459_AA0195880.1	High	bHLH
TRIAE_CS42_1DL_TGACv1_061484_AA0196550	TRIAE_CS42_1DL_TGACv1_061484_AA0196550.1	High	FAR1
TRIAE_CS42_1DL_TGACv1_061518_AA0197550	TRIAE_CS42_1DL_TGACv1_061518_AA0197550.1	High	NF-YB
TRIAE_CS42_1DL_TGACv1_061518_AA0197550	TRIAE_CS42_1DL_TGACv1_061518_AA0197550.2	High	NF-YB
TRIAE_CS42_1DL_TGACv1_061518_AA0197550	TRIAE_CS42_1DL_TGACv1_061518_AA0197550.3	High	NF-YB
TRIAE_CS42_1DL_TGACv1_061530_AA0197880	TRIAE_CS42_1DL_TGACv1_061530_AA0197880.1	High	GRAS
TRIAE_CS42_1DL_TGACv1_061531_AA0197890	TRIAE_CS42_1DL_TGACv1_061531_AA0197890.1	Low	CPP
TRIAE_CS42_1DL_TGACv1_061531_AA0197890	TRIAE_CS42_1DL_TGACv1_061531_AA0197890.2	Low	CPP
TRIAE_CS42_1DL_TGACv1_061531_AA0197910	TRIAE_CS42_1DL_TGACv1_061531_AA0197910.1	High	CPP
TRIAE_CS42_1DL_TGACv1_061550_AA0198510	TRIAE_CS42_1DL_TGACv1_061550_AA0198510.1	High	FAR1
TRIAE_CS42_1DL_TGACv1_061558_AA0198670	TRIAE_CS42_1DL_TGACv1_061558_AA0198670.1	High	WRKY
TRIAE_CS42_1DL_TGACv1_061564_AA0198760	TRIAE_CS42_1DL_TGACv1_061564_AA0198760.1	Low	FAR1
TRIAE_CS42_1DL_TGACv1_061579_AA0199110	TRIAE_CS42_1DL_TGACv1_061579_AA0199110.1	High	HSF
TRIAE_CS42_1DL_TGACv1_061579_AA0199110	TRIAE_CS42_1DL_TGACv1_061579_AA0199110.2	High	HSF
TRIAE_CS42_1DL_TGACv1_061618_AA0200060	TRIAE_CS42_1DL_TGACv1_061618_AA0200060.1	Low	CPP
TRIAE_CS42_1DL_TGACv1_061618_AA0200070	TRIAE_CS42_1DL_TGACv1_061618_AA0200070.1	Low	CPP
TRIAE_CS42_1DL_TGACv1_061663_AA0201250	TRIAE_CS42_1DL_TGACv1_061663_AA0201250.1	High	WRKY
TRIAE_CS42_1DL_TGACv1_061663_AA0201260	TRIAE_CS42_1DL_TGACv1_061663_AA0201260.1	High	WRKY
TRIAE_CS42_1DL_TGACv1_061663_AA0201290	TRIAE_CS42_1DL_TGACv1_061663_AA0201290.1	High	WRKY
TRIAE_CS42_1DL_TGACv1_061684_AA0201690	TRIAE_CS42_1DL_TGACv1_061684_AA0201690.1	High	bHLH
TRIAE_CS42_1DL_TGACv1_061719_AA0202320	TRIAE_CS42_1DL_TGACv1_061719_AA0202320.1	Low	FAR1
TRIAE_CS42_1DL_TGACv1_061726_AA0202510	TRIAE_CS42_1DL_TGACv1_061726_AA0202510.1	High	WRKY
TRIAE_CS42_1DL_TGACv1_061774_AA0203270	TRIAE_CS42_1DL_TGACv1_061774_AA0203270.1	Low	NF-YC
TRIAE_CS42_1DL_TGACv1_061774_AA0203280	TRIAE_CS42_1DL_TGACv1_061774_AA0203280.1	Low	NF-YC
TRIAE_CS42_1DL_TGACv1_061867_AA0204750	TRIAE_CS42_1DL_TGACv1_061867_AA0204750.1	Low	FAR1
TRIAE_CS42_1DL_TGACv1_061875_AA0205150	TRIAE_CS42_1DL_TGACv1_061875_AA0205150.1	High	ZF-HD
TRIAE_CS42_1DL_TGACv1_061880_AA0205230	TRIAE_CS42_1DL_TGACv1_061880_AA0205230.1	High	WRKY
TRIAE_CS42_1DL_TGACv1_061982_AA0206790	TRIAE_CS42_1DL_TGACv1_061982_AA0206790.1	High	Trihelix
TRIAE_CS42_1DL_TGACv1_061988_AA0206970	TRIAE_CS42_1DL_TGACv1_061988_AA0206970.1	High	bZIP
TRIAE_CS42_1DL_TGACv1_061988_AA0206970	TRIAE_CS42_1DL_TGACv1_061988_AA0206970.2	High	bZIP
TRIAE_CS42_1DL_TGACv1_061988_AA0206970	TRIAE_CS42_1DL_TGACv1_061988_AA0206970.3	High	bZIP
TRIAE_CS42_1DL_TGACv1_062019_AA0207490	TRIAE_CS42_1DL_TGACv1_062019_AA0207490.1	High	bZIP
TRIAE_CS42_1DL_TGACv1_062019_AA0207490	TRIAE_CS42_1DL_TGACv1_062019_AA0207490.2	High	bZIP
TRIAE_CS42_1DL_TGACv1_062041_AA0207900	TRIAE_CS42_1DL_TGACv1_062041_AA0207900.1	Low	FAR1
TRIAE_CS42_1DL_TGACv1_062101_AA0208750	TRIAE_CS42_1DL_TGACv1_062101_AA0208750.1	Low	LBD
TRIAE_CS42_1DL_TGACv1_062113_AA0208940	TRIAE_CS42_1DL_TGACv1_062113_AA0208940.1	High	bHLH
TRIAE_CS42_1DL_TGACv1_062167_AA0209820	TRIAE_CS42_1DL_TGACv1_062167_AA0209820.1	High	LBD
TRIAE_CS42_1DL_TGACv1_062176_AA0210050	TRIAE_CS42_1DL_TGACv1_062176_AA0210050.1	High	WRKY
TRIAE_CS42_1DL_TGACv1_062176_AA0210050	TRIAE_CS42_1DL_TGACv1_062176_AA0210050.2	High	WRKY
TRIAE_CS42_1DL_TGACv1_062218_AA0210650	TRIAE_CS42_1DL_TGACv1_062218_AA0210650.1	High	WRKY
TRIAE_CS42_1DL_TGACv1_062218_AA0210660	TRIAE_CS42_1DL_TGACv1_062218_AA0210660.1	High	WRKY
TRIAE_CS42_1DL_TGACv1_062219_AA0210680	TRIAE_CS42_1DL_TGACv1_062219_AA0210680.1	High	bHLH
TRIAE_CS42_1DL_TGACv1_062266_AA0211540	TRIAE_CS42_1DL_TGACv1_062266_AA0211540.1	High	CPP
TRIAE_CS42_1DL_TGACv1_062294_AA0211950	TRIAE_CS42_1DL_TGACv1_062294_AA0211950.1	Low	FAR1
TRIAE_CS42_1DL_TGACv1_062330_AA0212730	TRIAE_CS42_1DL_TGACv1_062330_AA0212730.1	High	FAR1
TRIAE_CS42_1DL_TGACv1_062330_AA0212730	TRIAE_CS42_1DL_TGACv1_062330_AA0212730.2	High	FAR1
TRIAE_CS42_1DL_TGACv1_062384_AA0213540	TRIAE_CS42_1DL_TGACv1_062384_AA0213540.1	High	SBP
TRIAE_CS42_1DL_TGACv1_062395_AA0213790	TRIAE_CS42_1DL_TGACv1_062395_AA0213790.1	High	bHLH
TRIAE_CS42_1DL_TGACv1_062411_AA0214140	TRIAE_CS42_1DL_TGACv1_062411_AA0214140.1	High	GATA
TRIAE_CS42_1DL_TGACv1_062436_AA0214410	TRIAE_CS42_1DL_TGACv1_062436_AA0214410.1	High	GATA
TRIAE_CS42_1DL_TGACv1_062466_AA0214860	TRIAE_CS42_1DL_TGACv1_062466_AA0214860.1	Low	CPP
TRIAE_CS42_1DL_TGACv1_062560_AA0216510	TRIAE_CS42_1DL_TGACv1_062560_AA0216510.1	High	FAR1
TRIAE_CS42_1DL_TGACv1_062560_AA0216510	TRIAE_CS42_1DL_TGACv1_062560_AA0216510.2	High	FAR1
TRIAE_CS42_1DL_TGACv1_062569_AA0216670	TRIAE_CS42_1DL_TGACv1_062569_AA0216670.1	Low	FAR1
TRIAE_CS42_1DL_TGACv1_062596_AA0216990	TRIAE_CS42_1DL_TGACv1_062596_AA0216990.1	High	bHLH
TRIAE_CS42_1DL_TGACv1_062654_AA0217860	TRIAE_CS42_1DL_TGACv1_062654_AA0217860.1	High	GRAS
TRIAE_CS42_1DL_TGACv1_062654_AA0217860	TRIAE_CS42_1DL_TGACv1_062654_AA0217860.2	High	GRAS
TRIAE_CS42_1DL_TGACv1_062654_AA0217860	TRIAE_CS42_1DL_TGACv1_062654_AA0217860.3	High	GRAS
TRIAE_CS42_1DL_TGACv1_062660_AA0217930	TRIAE_CS42_1DL_TGACv1_062660_AA0217930.1	High	SRS
TRIAE_CS42_1DL_TGACv1_062780_AA0219780	TRIAE_CS42_1DL_TGACv1_062780_AA0219780.1	High	bZIP
TRIAE_CS42_1DL_TGACv1_062807_AA0220310	TRIAE_CS42_1DL_TGACv1_062807_AA0220310.1	High	VOZ
TRIAE_CS42_1DL_TGACv1_062807_AA0220310	TRIAE_CS42_1DL_TGACv1_062807_AA0220310.2	High	VOZ
TRIAE_CS42_1DL_TGACv1_062807_AA0220310	TRIAE_CS42_1DL_TGACv1_062807_AA0220310.3	High	VOZ
TRIAE_CS42_1DL_TGACv1_062807_AA0220310	TRIAE_CS42_1DL_TGACv1_062807_AA0220310.4	High	VOZ
TRIAE_CS42_1DL_TGACv1_062954_AA0222140	TRIAE_CS42_1DL_TGACv1_062954_AA0222140.1	Low	GRAS
TRIAE_CS42_1DL_TGACv1_062954_AA0222150	TRIAE_CS42_1DL_TGACv1_062954_AA0222150.1	High	GRAS
TRIAE_CS42_1DL_TGACv1_063018_AA0223080	TRIAE_CS42_1DL_TGACv1_063018_AA0223080.1	High	FAR1
TRIAE_CS42_1DL_TGACv1_063105_AA0223920	TRIAE_CS42_1DL_TGACv1_063105_AA0223920.1	High	NAC
TRIAE_CS42_1DL_TGACv1_063150_AA0224430	TRIAE_CS42_1DL_TGACv1_063150_AA0224430.1	High	TCP
TRIAE_CS42_1DL_TGACv1_063150_AA0224430	TRIAE_CS42_1DL_TGACv1_063150_AA0224430.2	High	TCP
TRIAE_CS42_1DL_TGACv1_063151_AA0224440	TRIAE_CS42_1DL_TGACv1_063151_AA0224440.1	High	bZIP
TRIAE_CS42_1DL_TGACv1_063169_AA0224560	TRIAE_CS42_1DL_TGACv1_063169_AA0224560.1	High	bHLH
TRIAE_CS42_1DL_TGACv1_063229_AA0225270	TRIAE_CS42_1DL_TGACv1_063229_AA0225270.1	Low	FAR1
TRIAE_CS42_1DL_TGACv1_063234_AA0225340	TRIAE_CS42_1DL_TGACv1_063234_AA0225340.1	High	GATA
TRIAE_CS42_1DL_TGACv1_063239_AA0225400	TRIAE_CS42_1DL_TGACv1_063239_AA0225400.1	Low	FAR1
TRIAE_CS42_1DL_TGACv1_063373_AA0226720	TRIAE_CS42_1DL_TGACv1_063373_AA0226720.1	Low	FAR1
TRIAE_CS42_1DL_TGACv1_063379_AA0226840	TRIAE_CS42_1DL_TGACv1_063379_AA0226840.1	High	NAC
TRIAE_CS42_1DL_TGACv1_063483_AA0227820	TRIAE_CS42_1DL_TGACv1_063483_AA0227820.1	Low	FAR1
TRIAE_CS42_1DL_TGACv1_063515_AA0228100	TRIAE_CS42_1DL_TGACv1_063515_AA0228100.1	High	FAR1
TRIAE_CS42_1DL_TGACv1_063515_AA0228100	TRIAE_CS42_1DL_TGACv1_063515_AA0228100.2	High	FAR1
TRIAE_CS42_1DL_TGACv1_063533_AA0228340	TRIAE_CS42_1DL_TGACv1_063533_AA0228340.1	Low	GRAS
TRIAE_CS42_1DL_TGACv1_063545_AA0228500	TRIAE_CS42_1DL_TGACv1_063545_AA0228500.1	High	WRKY
TRIAE_CS42_1DL_TGACv1_063623_AA0229280	TRIAE_CS42_1DL_TGACv1_063623_AA0229280.1	High	NF-YC
TRIAE_CS42_1DL_TGACv1_063759_AA0230630	TRIAE_CS42_1DL_TGACv1_063759_AA0230630.1	High	CPP
TRIAE_CS42_1DL_TGACv1_064054_AA0232320	TRIAE_CS42_1DL_TGACv1_064054_AA0232320.1	High	E2F/DP
TRIAE_CS42_1DL_TGACv1_064163_AA0233000	TRIAE_CS42_1DL_TGACv1_064163_AA0233000.1	High	NAC
TRIAE_CS42_1DL_TGACv1_064198_AA0233190	TRIAE_CS42_1DL_TGACv1_064198_AA0233190.1	High	LBD
TRIAE_CS42_1DL_TGACv1_064278_AA0233690	TRIAE_CS42_1DL_TGACv1_064278_AA0233690.1	High	Dof
TRIAE_CS42_1DL_TGACv1_064506_AA0234720	TRIAE_CS42_1DL_TGACv1_064506_AA0234720.1	High	FAR1
TRIAE_CS42_1DL_TGACv1_064506_AA0234720	TRIAE_CS42_1DL_TGACv1_064506_AA0234720.2	High	FAR1
TRIAE_CS42_1DL_TGACv1_064506_AA0234720	TRIAE_CS42_1DL_TGACv1_064506_AA0234720.3	High	FAR1
TRIAE_CS42_1DL_TGACv1_064994_AA0236380	TRIAE_CS42_1DL_TGACv1_064994_AA0236380.1	High	GRAS
TRIAE_CS42_1DL_TGACv1_065287_AA0236780	TRIAE_CS42_1DL_TGACv1_065287_AA0236780.1	High	GATA
TRIAE_CS42_1DL_TGACv1_065512_AA0237210	TRIAE_CS42_1DL_TGACv1_065512_AA0237210.1	High	CPP
TRIAE_CS42_1DL_TGACv1_065512_AA0237210	TRIAE_CS42_1DL_TGACv1_065512_AA0237210.2	High	CPP
TRIAE_CS42_1DL_TGACv1_066112_AA0237700	TRIAE_CS42_1DL_TGACv1_066112_AA0237700.1	Low	Dof
TRIAE_CS42_1DL_TGACv1_066978_AA0237990	TRIAE_CS42_1DL_TGACv1_066978_AA0237990.1	Low	GRAS
TRIAE_CS42_1DL_TGACv1_067355_AA0238140	TRIAE_CS42_1DL_TGACv1_067355_AA0238140.1	Low	CPP
TRIAE_CS42_1DS_TGACv1_080116_AA0240020	TRIAE_CS42_1DS_TGACv1_080116_AA0240020.1	Low	FAR1
TRIAE_CS42_1DS_TGACv1_080120_AA0240250	TRIAE_CS42_1DS_TGACv1_080120_AA0240250.1	Low	FAR1
TRIAE_CS42_1DS_TGACv1_080128_AA0240730	TRIAE_CS42_1DS_TGACv1_080128_AA0240730.1	Low	FAR1
TRIAE_CS42_1DS_TGACv1_080134_AA0241000	TRIAE_CS42_1DS_TGACv1_080134_AA0241000.1	High	GATA
TRIAE_CS42_1DS_TGACv1_080148_AA0241450	TRIAE_CS42_1DS_TGACv1_080148_AA0241450.1	Low	FAR1
TRIAE_CS42_1DS_TGACv1_080190_AA0242510	TRIAE_CS42_1DS_TGACv1_080190_AA0242510.1	High	NAC
TRIAE_CS42_1DS_TGACv1_080190_AA0242510	TRIAE_CS42_1DS_TGACv1_080190_AA0242510.2	High	NAC
TRIAE_CS42_1DS_TGACv1_080209_AA0243170	TRIAE_CS42_1DS_TGACv1_080209_AA0243170.1	High	WRKY
TRIAE_CS42_1DS_TGACv1_080209_AA0243170	TRIAE_CS42_1DS_TGACv1_080209_AA0243170.2	High	WRKY
TRIAE_CS42_1DS_TGACv1_080209_AA0243170	TRIAE_CS42_1DS_TGACv1_080209_AA0243170.3	High	WRKY
TRIAE_CS42_1DS_TGACv1_080230_AA0243830	TRIAE_CS42_1DS_TGACv1_080230_AA0243830.1	High	FAR1
TRIAE_CS42_1DS_TGACv1_080231_AA0243850	TRIAE_CS42_1DS_TGACv1_080231_AA0243850.1	Low	FAR1
TRIAE_CS42_1DS_TGACv1_080248_AA0244230	TRIAE_CS42_1DS_TGACv1_080248_AA0244230.1	Low	ZF-HD
TRIAE_CS42_1DS_TGACv1_080252_AA0244300	TRIAE_CS42_1DS_TGACv1_080252_AA0244300.1	Low	FAR1
TRIAE_CS42_1DS_TGACv1_080269_AA0244760	TRIAE_CS42_1DS_TGACv1_080269_AA0244760.1	High	NAC
TRIAE_CS42_1DS_TGACv1_080283_AA0245100	TRIAE_CS42_1DS_TGACv1_080283_AA0245100.1	High	GRAS
TRIAE_CS42_1DS_TGACv1_080283_AA0245110	TRIAE_CS42_1DS_TGACv1_080283_AA0245110.1	High	GRAS
TRIAE_CS42_1DS_TGACv1_080283_AA0245130	TRIAE_CS42_1DS_TGACv1_080283_AA0245130.1	Low	GRAS
TRIAE_CS42_1DS_TGACv1_080283_AA0245140	TRIAE_CS42_1DS_TGACv1_080283_AA0245140.1	High	GRAS
TRIAE_CS42_1DS_TGACv1_080292_AA0245420	TRIAE_CS42_1DS_TGACv1_080292_AA0245420.1	High	bZIP
TRIAE_CS42_1DS_TGACv1_080295_AA0245480	TRIAE_CS42_1DS_TGACv1_080295_AA0245480.1	High	Dof
TRIAE_CS42_1DS_TGACv1_080295_AA0245480	TRIAE_CS42_1DS_TGACv1_080295_AA0245480.2	High	Dof
TRIAE_CS42_1DS_TGACv1_080333_AA0246130	TRIAE_CS42_1DS_TGACv1_080333_AA0246130.1	Low	NF-YB
TRIAE_CS42_1DS_TGACv1_080383_AA0247100	TRIAE_CS42_1DS_TGACv1_080383_AA0247100.1	Low	FAR1
TRIAE_CS42_1DS_TGACv1_080393_AA0247260	TRIAE_CS42_1DS_TGACv1_080393_AA0247260.1	High	bHLH
TRIAE_CS42_1DS_TGACv1_080393_AA0247260	TRIAE_CS42_1DS_TGACv1_080393_AA0247260.2	High	bHLH
TRIAE_CS42_1DS_TGACv1_080393_AA0247260	TRIAE_CS42_1DS_TGACv1_080393_AA0247260.3	High	bHLH
TRIAE_CS42_1DS_TGACv1_080393_AA0247260	TRIAE_CS42_1DS_TGACv1_080393_AA0247260.4	High	bHLH
TRIAE_CS42_1DS_TGACv1_080440_AA0248010	TRIAE_CS42_1DS_TGACv1_080440_AA0248010.1	Low	FAR1
TRIAE_CS42_1DS_TGACv1_080579_AA0250450	TRIAE_CS42_1DS_TGACv1_080579_AA0250450.1	Low	GRAS
TRIAE_CS42_1DS_TGACv1_080579_AA0250460	TRIAE_CS42_1DS_TGACv1_080579_AA0250460.1	High	GRAS
TRIAE_CS42_1DS_TGACv1_080579_AA0250480	TRIAE_CS42_1DS_TGACv1_080579_AA0250480.1	High	GRAS
TRIAE_CS42_1DS_TGACv1_080579_AA0250500	TRIAE_CS42_1DS_TGACv1_080579_AA0250500.1	Low	GRAS
TRIAE_CS42_1DS_TGACv1_080648_AA0251560	TRIAE_CS42_1DS_TGACv1_080648_AA0251560.1	High	bHLH
TRIAE_CS42_1DS_TGACv1_080663_AA0251850	TRIAE_CS42_1DS_TGACv1_080663_AA0251850.1	High	LBD
TRIAE_CS42_1DS_TGACv1_080689_AA0252280	TRIAE_CS42_1DS_TGACv1_080689_AA0252280.1	High	bHLH
TRIAE_CS42_1DS_TGACv1_080689_AA0252280	TRIAE_CS42_1DS_TGACv1_080689_AA0252280.2	High	bHLH
TRIAE_CS42_1DS_TGACv1_080697_AA0252340	TRIAE_CS42_1DS_TGACv1_080697_AA0252340.1	High	WRKY
TRIAE_CS42_1DS_TGACv1_080703_AA0252440	TRIAE_CS42_1DS_TGACv1_080703_AA0252440.1	Low	FAR1
TRIAE_CS42_1DS_TGACv1_080750_AA0253200	TRIAE_CS42_1DS_TGACv1_080750_AA0253200.1	High	FAR1
TRIAE_CS42_1DS_TGACv1_080750_AA0253200	TRIAE_CS42_1DS_TGACv1_080750_AA0253200.2	High	FAR1
TRIAE_CS42_1DS_TGACv1_080951_AA0255990	TRIAE_CS42_1DS_TGACv1_080951_AA0255990.1	High	bHLH
TRIAE_CS42_1DS_TGACv1_080958_AA0256060	TRIAE_CS42_1DS_TGACv1_080958_AA0256060.1	High	NF-YC
TRIAE_CS42_1DS_TGACv1_080972_AA0256260	TRIAE_CS42_1DS_TGACv1_080972_AA0256260.1	Low	FAR1
TRIAE_CS42_1DS_TGACv1_081092_AA0257590	TRIAE_CS42_1DS_TGACv1_081092_AA0257590.1	High	ZF-HD
TRIAE_CS42_1DS_TGACv1_081145_AA0258030	TRIAE_CS42_1DS_TGACv1_081145_AA0258030.1	Low	FAR1
TRIAE_CS42_1DS_TGACv1_081152_AA0258100	TRIAE_CS42_1DS_TGACv1_081152_AA0258100.1	High	bHLH
TRIAE_CS42_1DS_TGACv1_081165_AA0258240	TRIAE_CS42_1DS_TGACv1_081165_AA0258240.1	High	LBD
TRIAE_CS42_1DS_TGACv1_081606_AA0261850	TRIAE_CS42_1DS_TGACv1_081606_AA0261850.1	High	bZIP
TRIAE_CS42_1DS_TGACv1_081620_AA0261980	TRIAE_CS42_1DS_TGACv1_081620_AA0261980.1	Low	GRAS
TRIAE_CS42_1DS_TGACv1_081735_AA0262510	TRIAE_CS42_1DS_TGACv1_081735_AA0262510.1	Low	FAR1
TRIAE_CS42_1DS_TGACv1_082184_AA0264060	TRIAE_CS42_1DS_TGACv1_082184_AA0264060.1	High	Trihelix
TRIAE_CS42_1DS_TGACv1_082184_AA0264060	TRIAE_CS42_1DS_TGACv1_082184_AA0264060.2	High	Trihelix
TRIAE_CS42_1DS_TGACv1_082309_AA0264410	TRIAE_CS42_1DS_TGACv1_082309_AA0264410.1	Low	FAR1
TRIAE_CS42_1DS_TGACv1_083045_AA0265180	TRIAE_CS42_1DS_TGACv1_083045_AA0265180.1	Low	FAR1
TRIAE_CS42_2AL_TGACv1_092887_AA0266100	TRIAE_CS42_2AL_TGACv1_092887_AA0266100.1	High	GRAS
TRIAE_CS42_2AL_TGACv1_092887_AA0266100	TRIAE_CS42_2AL_TGACv1_092887_AA0266100.2	High	GRAS
TRIAE_CS42_2AL_TGACv1_092910_AA0266830	TRIAE_CS42_2AL_TGACv1_092910_AA0266830.1	High	bHLH
TRIAE_CS42_2AL_TGACv1_092917_AA0267020	TRIAE_CS42_2AL_TGACv1_092917_AA0267020.1	Low	FAR1
TRIAE_CS42_2AL_TGACv1_092984_AA0268670	TRIAE_CS42_2AL_TGACv1_092984_AA0268670.1	High	bHLH
TRIAE_CS42_2AL_TGACv1_092984_AA0268670	TRIAE_CS42_2AL_TGACv1_092984_AA0268670.2	High	bHLH
TRIAE_CS42_2AL_TGACv1_092984_AA0268670	TRIAE_CS42_2AL_TGACv1_092984_AA0268670.3	High	bHLH
TRIAE_CS42_2AL_TGACv1_092984_AA0268670	TRIAE_CS42_2AL_TGACv1_092984_AA0268670.4	High	bHLH
TRIAE_CS42_2AL_TGACv1_092984_AA0268670	TRIAE_CS42_2AL_TGACv1_092984_AA0268670.5	High	bHLH
TRIAE_CS42_2AL_TGACv1_092984_AA0268670	TRIAE_CS42_2AL_TGACv1_092984_AA0268670.6	High	bHLH
TRIAE_CS42_2AL_TGACv1_092984_AA0268670	TRIAE_CS42_2AL_TGACv1_092984_AA0268670.7	High	bHLH
TRIAE_CS42_2AL_TGACv1_092997_AA0269080	TRIAE_CS42_2AL_TGACv1_092997_AA0269080.1	Low	FAR1
TRIAE_CS42_2AL_TGACv1_093024_AA0269720	TRIAE_CS42_2AL_TGACv1_093024_AA0269720.1	High	NAC
TRIAE_CS42_2AL_TGACv1_093024_AA0269730	TRIAE_CS42_2AL_TGACv1_093024_AA0269730.1	High	NAC
TRIAE_CS42_2AL_TGACv1_093056_AA0270750	TRIAE_CS42_2AL_TGACv1_093056_AA0270750.1	Low	NAC
TRIAE_CS42_2AL_TGACv1_093056_AA0270760	TRIAE_CS42_2AL_TGACv1_093056_AA0270760.1	Low	NAC
TRIAE_CS42_2AL_TGACv1_093056_AA0270770	TRIAE_CS42_2AL_TGACv1_093056_AA0270770.1	High	NAC
TRIAE_CS42_2AL_TGACv1_093073_AA0271250	TRIAE_CS42_2AL_TGACv1_093073_AA0271250.1	High	NAC
TRIAE_CS42_2AL_TGACv1_093177_AA0274160	TRIAE_CS42_2AL_TGACv1_093177_AA0274160.1	High	WRKY
TRIAE_CS42_2AL_TGACv1_093178_AA0274210	TRIAE_CS42_2AL_TGACv1_093178_AA0274210.1	High	FAR1
TRIAE_CS42_2AL_TGACv1_093178_AA0274210	TRIAE_CS42_2AL_TGACv1_093178_AA0274210.2	High	FAR1
TRIAE_CS42_2AL_TGACv1_093221_AA0275330	TRIAE_CS42_2AL_TGACv1_093221_AA0275330.1	High	FAR1
TRIAE_CS42_2AL_TGACv1_093231_AA0275570	TRIAE_CS42_2AL_TGACv1_093231_AA0275570.1	High	Dof
TRIAE_CS42_2AL_TGACv1_093231_AA0275600	TRIAE_CS42_2AL_TGACv1_093231_AA0275600.1	High	Dof
TRIAE_CS42_2AL_TGACv1_093231_AA0275610	TRIAE_CS42_2AL_TGACv1_093231_AA0275610.1	High	Dof
TRIAE_CS42_2AL_TGACv1_093239_AA0275680	TRIAE_CS42_2AL_TGACv1_093239_AA0275680.1	High	Trihelix
TRIAE_CS42_2AL_TGACv1_093291_AA0276770	TRIAE_CS42_2AL_TGACv1_093291_AA0276770.1	High	LBD
TRIAE_CS42_2AL_TGACv1_093319_AA0277330	TRIAE_CS42_2AL_TGACv1_093319_AA0277330.1	High	NAC
TRIAE_CS42_2AL_TGACv1_093319_AA0277330	TRIAE_CS42_2AL_TGACv1_093319_AA0277330.2	High	NAC
TRIAE_CS42_2AL_TGACv1_093349_AA0278210	TRIAE_CS42_2AL_TGACv1_093349_AA0278210.1	High	bHLH
TRIAE_CS42_2AL_TGACv1_093360_AA0278480	TRIAE_CS42_2AL_TGACv1_093360_AA0278480.1	Low	FAR1
TRIAE_CS42_2AL_TGACv1_093386_AA0278960	TRIAE_CS42_2AL_TGACv1_093386_AA0278960.1	High	bZIP
TRIAE_CS42_2AL_TGACv1_093409_AA0279520	TRIAE_CS42_2AL_TGACv1_093409_AA0279520.1	Low	FAR1
TRIAE_CS42_2AL_TGACv1_093434_AA0280080	TRIAE_CS42_2AL_TGACv1_093434_AA0280080.1	Low	FAR1
TRIAE_CS42_2AL_TGACv1_093459_AA0280500	TRIAE_CS42_2AL_TGACv1_093459_AA0280500.1	High	Trihelix
TRIAE_CS42_2AL_TGACv1_093498_AA0281220	TRIAE_CS42_2AL_TGACv1_093498_AA0281220.1	High	GATA
TRIAE_CS42_2AL_TGACv1_093498_AA0281220	TRIAE_CS42_2AL_TGACv1_093498_AA0281220.2	High	GATA
TRIAE_CS42_2AL_TGACv1_093509_AA0281460	TRIAE_CS42_2AL_TGACv1_093509_AA0281460.1	High	NF-YB
TRIAE_CS42_2AL_TGACv1_093526_AA0281750	TRIAE_CS42_2AL_TGACv1_093526_AA0281750.1	High	TCP
TRIAE_CS42_2AL_TGACv1_093527_AA0281800	TRIAE_CS42_2AL_TGACv1_093527_AA0281800.1	High	NAC
TRIAE_CS42_2AL_TGACv1_093527_AA0281800	TRIAE_CS42_2AL_TGACv1_093527_AA0281800.2	High	NAC
TRIAE_CS42_2AL_TGACv1_093527_AA0281810	TRIAE_CS42_2AL_TGACv1_093527_AA0281810.1	Low	FAR1
TRIAE_CS42_2AL_TGACv1_093527_AA0281830	TRIAE_CS42_2AL_TGACv1_093527_AA0281830.1	High	NAC
TRIAE_CS42_2AL_TGACv1_093527_AA0281840	TRIAE_CS42_2AL_TGACv1_093527_AA0281840.1	High	NAC
TRIAE_CS42_2AL_TGACv1_093528_AA0281850	TRIAE_CS42_2AL_TGACv1_093528_AA0281850.1	High	SBP
TRIAE_CS42_2AL_TGACv1_093570_AA0282740	TRIAE_CS42_2AL_TGACv1_093570_AA0282740.1	High	WRKY
TRIAE_CS42_2AL_TGACv1_093593_AA0283390	TRIAE_CS42_2AL_TGACv1_093593_AA0283390.1	Low	FAR1
TRIAE_CS42_2AL_TGACv1_093618_AA0283710	TRIAE_CS42_2AL_TGACv1_093618_AA0283710.1	High	NAC
TRIAE_CS42_2AL_TGACv1_093618_AA0283710	TRIAE_CS42_2AL_TGACv1_093618_AA0283710.2	High	NAC
TRIAE_CS42_2AL_TGACv1_093662_AA0284750	TRIAE_CS42_2AL_TGACv1_093662_AA0284750.1	High	bZIP
TRIAE_CS42_2AL_TGACv1_093662_AA0284760	TRIAE_CS42_2AL_TGACv1_093662_AA0284760.1	High	bZIP
TRIAE_CS42_2AL_TGACv1_093704_AA0285420	TRIAE_CS42_2AL_TGACv1_093704_AA0285420.1	High	FAR1
TRIAE_CS42_2AL_TGACv1_093763_AA0286290	TRIAE_CS42_2AL_TGACv1_093763_AA0286290.1	High	bHLH
TRIAE_CS42_2AL_TGACv1_093769_AA0286390	TRIAE_CS42_2AL_TGACv1_093769_AA0286390.1	High	NAC
TRIAE_CS42_2AL_TGACv1_093769_AA0286390	TRIAE_CS42_2AL_TGACv1_093769_AA0286390.2	High	NAC
TRIAE_CS42_2AL_TGACv1_093803_AA0287050	TRIAE_CS42_2AL_TGACv1_093803_AA0287050.1	High	Nin-like
TRIAE_CS42_2AL_TGACv1_093803_AA0287080	TRIAE_CS42_2AL_TGACv1_093803_AA0287080.1	High	Nin-like
TRIAE_CS42_2AL_TGACv1_093803_AA0287080	TRIAE_CS42_2AL_TGACv1_093803_AA0287080.2	High	Nin-like
TRIAE_CS42_2AL_TGACv1_093824_AA0287570	TRIAE_CS42_2AL_TGACv1_093824_AA0287570.1	High	EIL
TRIAE_CS42_2AL_TGACv1_093827_AA0287590	TRIAE_CS42_2AL_TGACv1_093827_AA0287590.1	Low	FAR1
TRIAE_CS42_2AL_TGACv1_093839_AA0287900	TRIAE_CS42_2AL_TGACv1_093839_AA0287900.1	Low	FAR1
TRIAE_CS42_2AL_TGACv1_093841_AA0287950	TRIAE_CS42_2AL_TGACv1_093841_AA0287950.1	Low	FAR1
TRIAE_CS42_2AL_TGACv1_093857_AA0288300	TRIAE_CS42_2AL_TGACv1_093857_AA0288300.1	Low	FAR1
TRIAE_CS42_2AL_TGACv1_093880_AA0288640	TRIAE_CS42_2AL_TGACv1_093880_AA0288640.1	High	E2F/DP
TRIAE_CS42_2AL_TGACv1_093893_AA0288910	TRIAE_CS42_2AL_TGACv1_093893_AA0288910.1	High	Trihelix
TRIAE_CS42_2AL_TGACv1_093898_AA0288940	TRIAE_CS42_2AL_TGACv1_093898_AA0288940.1	High	FAR1
TRIAE_CS42_2AL_TGACv1_093921_AA0289390	TRIAE_CS42_2AL_TGACv1_093921_AA0289390.1	High	bHLH
TRIAE_CS42_2AL_TGACv1_093921_AA0289390	TRIAE_CS42_2AL_TGACv1_093921_AA0289390.2	High	bHLH
TRIAE_CS42_2AL_TGACv1_093925_AA0289490	TRIAE_CS42_2AL_TGACv1_093925_AA0289490.1	Low	FAR1
TRIAE_CS42_2AL_TGACv1_093931_AA0289620	TRIAE_CS42_2AL_TGACv1_093931_AA0289620.1	High	Trihelix
TRIAE_CS42_2AL_TGACv1_093939_AA0289710	TRIAE_CS42_2AL_TGACv1_093939_AA0289710.1	High	S1Fa-like
TRIAE_CS42_2AL_TGACv1_093939_AA0289710	TRIAE_CS42_2AL_TGACv1_093939_AA0289710.2	High	S1Fa-like
TRIAE_CS42_2AL_TGACv1_093944_AA0289780	TRIAE_CS42_2AL_TGACv1_093944_AA0289780.1	High	GATA
TRIAE_CS42_2AL_TGACv1_093944_AA0289790	TRIAE_CS42_2AL_TGACv1_093944_AA0289790.1	High	GATA
TRIAE_CS42_2AL_TGACv1_093944_AA0289790	TRIAE_CS42_2AL_TGACv1_093944_AA0289790.2	High	GATA
TRIAE_CS42_2AL_TGACv1_093944_AA0289800	TRIAE_CS42_2AL_TGACv1_093944_AA0289800.1	High	GATA
TRIAE_CS42_2AL_TGACv1_093957_AA0290200	TRIAE_CS42_2AL_TGACv1_093957_AA0290200.1	High	ZF-HD
TRIAE_CS42_2AL_TGACv1_093980_AA0290590	TRIAE_CS42_2AL_TGACv1_093980_AA0290590.1	High	GRAS
TRIAE_CS42_2AL_TGACv1_094021_AA0291200	TRIAE_CS42_2AL_TGACv1_094021_AA0291200.1	High	YABBY
TRIAE_CS42_2AL_TGACv1_094054_AA0291690	TRIAE_CS42_2AL_TGACv1_094054_AA0291690.1	High	NAC
TRIAE_CS42_2AL_TGACv1_094066_AA0291970	TRIAE_CS42_2AL_TGACv1_094066_AA0291970.1	High	bHLH
TRIAE_CS42_2AL_TGACv1_094066_AA0291970	TRIAE_CS42_2AL_TGACv1_094066_AA0291970.2	High	bHLH
TRIAE_CS42_2AL_TGACv1_094099_AA0292580	TRIAE_CS42_2AL_TGACv1_094099_AA0292580.1	High	NAC
TRIAE_CS42_2AL_TGACv1_094099_AA0292580	TRIAE_CS42_2AL_TGACv1_094099_AA0292580.2	High	NAC
TRIAE_CS42_2AL_TGACv1_094144_AA0293260	TRIAE_CS42_2AL_TGACv1_094144_AA0293260.1	High	Dof
TRIAE_CS42_2AL_TGACv1_094162_AA0293510	TRIAE_CS42_2AL_TGACv1_094162_AA0293510.1	High	WRKY
TRIAE_CS42_2AL_TGACv1_094196_AA0294120	TRIAE_CS42_2AL_TGACv1_094196_AA0294120.1	High	NAC
TRIAE_CS42_2AL_TGACv1_094196_AA0294120	TRIAE_CS42_2AL_TGACv1_094196_AA0294120.2	High	NAC
TRIAE_CS42_2AL_TGACv1_094246_AA0294970	TRIAE_CS42_2AL_TGACv1_094246_AA0294970.1	High	GATA
TRIAE_CS42_2AL_TGACv1_094246_AA0294970	TRIAE_CS42_2AL_TGACv1_094246_AA0294970.2	High	GATA
TRIAE_CS42_2AL_TGACv1_094285_AA0295340	TRIAE_CS42_2AL_TGACv1_094285_AA0295340.1	High	WRKY
TRIAE_CS42_2AL_TGACv1_094285_AA0295340	TRIAE_CS42_2AL_TGACv1_094285_AA0295340.2	High	WRKY
TRIAE_CS42_2AL_TGACv1_094353_AA0296380	TRIAE_CS42_2AL_TGACv1_094353_AA0296380.1	High	NAC
TRIAE_CS42_2AL_TGACv1_094444_AA0297600	TRIAE_CS42_2AL_TGACv1_094444_AA0297600.1	High	WRKY
TRIAE_CS42_2AL_TGACv1_094450_AA0297760	TRIAE_CS42_2AL_TGACv1_094450_AA0297760.1	Low	FAR1
TRIAE_CS42_2AL_TGACv1_094488_AA0298690	TRIAE_CS42_2AL_TGACv1_094488_AA0298690.1	High	FAR1
TRIAE_CS42_2AL_TGACv1_094494_AA0298810	TRIAE_CS42_2AL_TGACv1_094494_AA0298810.1	High	FAR1
TRIAE_CS42_2AL_TGACv1_094494_AA0298810	TRIAE_CS42_2AL_TGACv1_094494_AA0298810.2	High	FAR1
TRIAE_CS42_2AL_TGACv1_094503_AA0298870	TRIAE_CS42_2AL_TGACv1_094503_AA0298870.1	Low	FAR1
TRIAE_CS42_2AL_TGACv1_094522_AA0299120	TRIAE_CS42_2AL_TGACv1_094522_AA0299120.1	High	Trihelix
TRIAE_CS42_2AL_TGACv1_094535_AA0299360	TRIAE_CS42_2AL_TGACv1_094535_AA0299360.1	High	Trihelix
TRIAE_CS42_2AL_TGACv1_094535_AA0299360	TRIAE_CS42_2AL_TGACv1_094535_AA0299360.2	High	Trihelix
TRIAE_CS42_2AL_TGACv1_094535_AA0299360	TRIAE_CS42_2AL_TGACv1_094535_AA0299360.3	High	Trihelix
TRIAE_CS42_2AL_TGACv1_094535_AA0299360	TRIAE_CS42_2AL_TGACv1_094535_AA0299360.4	High	Trihelix
TRIAE_CS42_2AL_TGACv1_094535_AA0299360	TRIAE_CS42_2AL_TGACv1_094535_AA0299360.5	High	Trihelix
TRIAE_CS42_2AL_TGACv1_094562_AA0299690	TRIAE_CS42_2AL_TGACv1_094562_AA0299690.1	High	NAC
TRIAE_CS42_2AL_TGACv1_094562_AA0299690	TRIAE_CS42_2AL_TGACv1_094562_AA0299690.2	High	NAC
TRIAE_CS42_2AL_TGACv1_094574_AA0299820	TRIAE_CS42_2AL_TGACv1_094574_AA0299820.1	High	Dof
TRIAE_CS42_2AL_TGACv1_094574_AA0299820	TRIAE_CS42_2AL_TGACv1_094574_AA0299820.2	High	Dof
TRIAE_CS42_2AL_TGACv1_094574_AA0299820	TRIAE_CS42_2AL_TGACv1_094574_AA0299820.3	High	Dof
TRIAE_CS42_2AL_TGACv1_094582_AA0299950	TRIAE_CS42_2AL_TGACv1_094582_AA0299950.1	High	WRKY
TRIAE_CS42_2AL_TGACv1_094606_AA0300370	TRIAE_CS42_2AL_TGACv1_094606_AA0300370.1	High	GRAS
TRIAE_CS42_2AL_TGACv1_094614_AA0300490	TRIAE_CS42_2AL_TGACv1_094614_AA0300490.1	High	NAC
TRIAE_CS42_2AL_TGACv1_094615_AA0300520	TRIAE_CS42_2AL_TGACv1_094615_AA0300520.3	High	FAR1
TRIAE_CS42_2AL_TGACv1_094650_AA0301090	TRIAE_CS42_2AL_TGACv1_094650_AA0301090.1	High	HSF
TRIAE_CS42_2AL_TGACv1_094707_AA0301850	TRIAE_CS42_2AL_TGACv1_094707_AA0301850.1	High	bHLH
TRIAE_CS42_2AL_TGACv1_094886_AA0304600	TRIAE_CS42_2AL_TGACv1_094886_AA0304600.1	High	bZIP
TRIAE_CS42_2AL_TGACv1_094902_AA0304710	TRIAE_CS42_2AL_TGACv1_094902_AA0304710.1	High	NAC
TRIAE_CS42_2AL_TGACv1_094902_AA0304710	TRIAE_CS42_2AL_TGACv1_094902_AA0304710.2	High	NAC
TRIAE_CS42_2AL_TGACv1_094906_AA0304730	TRIAE_CS42_2AL_TGACv1_094906_AA0304730.1	High	NAC
TRIAE_CS42_2AL_TGACv1_094915_AA0304780	TRIAE_CS42_2AL_TGACv1_094915_AA0304780.1	High	WRKY
TRIAE_CS42_2AL_TGACv1_094915_AA0304780	TRIAE_CS42_2AL_TGACv1_094915_AA0304780.2	High	WRKY
TRIAE_CS42_2AL_TGACv1_094993_AA0305730	TRIAE_CS42_2AL_TGACv1_094993_AA0305730.1	High	WRKY
TRIAE_CS42_2AL_TGACv1_095000_AA0305800	TRIAE_CS42_2AL_TGACv1_095000_AA0305800.1	High	FAR1
TRIAE_CS42_2AL_TGACv1_095024_AA0305990	TRIAE_CS42_2AL_TGACv1_095024_AA0305990.1	High	bHLH
TRIAE_CS42_2AL_TGACv1_095093_AA0306790	TRIAE_CS42_2AL_TGACv1_095093_AA0306790.1	High	GATA
TRIAE_CS42_2AL_TGACv1_095101_AA0306920	TRIAE_CS42_2AL_TGACv1_095101_AA0306920.1	High	NAC
TRIAE_CS42_2AL_TGACv1_095101_AA0306920	TRIAE_CS42_2AL_TGACv1_095101_AA0306920.2	High	NAC
TRIAE_CS42_2AL_TGACv1_095119_AA0307150	TRIAE_CS42_2AL_TGACv1_095119_AA0307150.1	High	bHLH
TRIAE_CS42_2AL_TGACv1_095119_AA0307150	TRIAE_CS42_2AL_TGACv1_095119_AA0307150.2	High	bHLH
TRIAE_CS42_2AL_TGACv1_095138_AA0307320	TRIAE_CS42_2AL_TGACv1_095138_AA0307320.1	Low	FAR1
TRIAE_CS42_2AL_TGACv1_095147_AA0307480	TRIAE_CS42_2AL_TGACv1_095147_AA0307480.1	High	LBD
TRIAE_CS42_2AL_TGACv1_095189_AA0308120	TRIAE_CS42_2AL_TGACv1_095189_AA0308120.1	High	NAC
TRIAE_CS42_2AL_TGACv1_095212_AA0308320	TRIAE_CS42_2AL_TGACv1_095212_AA0308320.1	High	GRAS
TRIAE_CS42_2AL_TGACv1_095276_AA0309030	TRIAE_CS42_2AL_TGACv1_095276_AA0309030.1	Low	FAR1
TRIAE_CS42_2AL_TGACv1_095304_AA0309380	TRIAE_CS42_2AL_TGACv1_095304_AA0309380.1	High	Trihelix
TRIAE_CS42_2AL_TGACv1_095427_AA0310620	TRIAE_CS42_2AL_TGACv1_095427_AA0310620.1	High	NAC
TRIAE_CS42_2AL_TGACv1_095435_AA0310690	TRIAE_CS42_2AL_TGACv1_095435_AA0310690.1	Low	FAR1
TRIAE_CS42_2AL_TGACv1_095600_AA0312670	TRIAE_CS42_2AL_TGACv1_095600_AA0312670.1	High	FAR1
TRIAE_CS42_2AL_TGACv1_095620_AA0313000	TRIAE_CS42_2AL_TGACv1_095620_AA0313000.1	High	FAR1
TRIAE_CS42_2AL_TGACv1_095673_AA0313570	TRIAE_CS42_2AL_TGACv1_095673_AA0313570.1	High	CAMTA
TRIAE_CS42_2AL_TGACv1_095673_AA0313570	TRIAE_CS42_2AL_TGACv1_095673_AA0313570.2	High	CAMTA
TRIAE_CS42_2AL_TGACv1_095673_AA0313570	TRIAE_CS42_2AL_TGACv1_095673_AA0313570.3	High	CAMTA
TRIAE_CS42_2AL_TGACv1_095673_AA0313570	TRIAE_CS42_2AL_TGACv1_095673_AA0313570.4	High	CAMTA
TRIAE_CS42_2AL_TGACv1_095673_AA0313570	TRIAE_CS42_2AL_TGACv1_095673_AA0313570.5	High	CAMTA
TRIAE_CS42_2AL_TGACv1_095673_AA0313570	TRIAE_CS42_2AL_TGACv1_095673_AA0313570.6	High	CAMTA
TRIAE_CS42_2AL_TGACv1_095673_AA0313570	TRIAE_CS42_2AL_TGACv1_095673_AA0313570.7	High	CAMTA
TRIAE_CS42_2AL_TGACv1_095673_AA0313570	TRIAE_CS42_2AL_TGACv1_095673_AA0313570.8	High	CAMTA
TRIAE_CS42_2AL_TGACv1_095673_AA0313570	TRIAE_CS42_2AL_TGACv1_095673_AA0313570.9	High	CAMTA
TRIAE_CS42_2AL_TGACv1_095705_AA0313970	TRIAE_CS42_2AL_TGACv1_095705_AA0313970.1	High	bHLH
TRIAE_CS42_2AL_TGACv1_095790_AA0314590	TRIAE_CS42_2AL_TGACv1_095790_AA0314590.1	High	bZIP
TRIAE_CS42_2AL_TGACv1_095790_AA0314590	TRIAE_CS42_2AL_TGACv1_095790_AA0314590.2	High	bZIP
TRIAE_CS42_2AL_TGACv1_095867_AA0315270	TRIAE_CS42_2AL_TGACv1_095867_AA0315270.1	Low	FAR1
TRIAE_CS42_2AL_TGACv1_096039_AA0316870	TRIAE_CS42_2AL_TGACv1_096039_AA0316870.1	High	NAC
TRIAE_CS42_2AL_TGACv1_096180_AA0317630	TRIAE_CS42_2AL_TGACv1_096180_AA0317630.1	High	bHLH
TRIAE_CS42_2AL_TGACv1_096237_AA0318100	TRIAE_CS42_2AL_TGACv1_096237_AA0318100.1	Low	FAR1
TRIAE_CS42_2AL_TGACv1_096288_AA0318370	TRIAE_CS42_2AL_TGACv1_096288_AA0318370.1	High	bHLH
TRIAE_CS42_2AL_TGACv1_096318_AA0318600	TRIAE_CS42_2AL_TGACv1_096318_AA0318600.1	High	bHLH
TRIAE_CS42_2AL_TGACv1_096383_AA0318980	TRIAE_CS42_2AL_TGACv1_096383_AA0318980.1	High	bZIP
TRIAE_CS42_2AL_TGACv1_096383_AA0318980	TRIAE_CS42_2AL_TGACv1_096383_AA0318980.2	High	bZIP
TRIAE_CS42_2AL_TGACv1_096383_AA0318980	TRIAE_CS42_2AL_TGACv1_096383_AA0318980.3	High	bZIP
TRIAE_CS42_2AL_TGACv1_096473_AA0319360	TRIAE_CS42_2AL_TGACv1_096473_AA0319360.1	High	bHLH
TRIAE_CS42_2AL_TGACv1_096521_AA0319660	TRIAE_CS42_2AL_TGACv1_096521_AA0319660.1	High	bHLH
TRIAE_CS42_2AL_TGACv1_096560_AA0319870	TRIAE_CS42_2AL_TGACv1_096560_AA0319870.1	High	FAR1
TRIAE_CS42_2AL_TGACv1_096560_AA0319870	TRIAE_CS42_2AL_TGACv1_096560_AA0319870.2	High	FAR1
TRIAE_CS42_2AL_TGACv1_096691_AA0320620	TRIAE_CS42_2AL_TGACv1_096691_AA0320620.1	High	bZIP
TRIAE_CS42_2AL_TGACv1_096691_AA0320620	TRIAE_CS42_2AL_TGACv1_096691_AA0320620.2	High	bZIP
TRIAE_CS42_2AL_TGACv1_096691_AA0320620	TRIAE_CS42_2AL_TGACv1_096691_AA0320620.4	High	bZIP
TRIAE_CS42_2AL_TGACv1_096691_AA0320620	TRIAE_CS42_2AL_TGACv1_096691_AA0320620.5	High	bZIP
TRIAE_CS42_2AL_TGACv1_096739_AA0321050	TRIAE_CS42_2AL_TGACv1_096739_AA0321050.1	High	NAC
TRIAE_CS42_2AL_TGACv1_096739_AA0321060	TRIAE_CS42_2AL_TGACv1_096739_AA0321060.1	High	NAC
TRIAE_CS42_2AL_TGACv1_096767_AA0321290	TRIAE_CS42_2AL_TGACv1_096767_AA0321290.1	High	NAC
TRIAE_CS42_2AL_TGACv1_096767_AA0321290	TRIAE_CS42_2AL_TGACv1_096767_AA0321290.2	High	NAC
TRIAE_CS42_2AL_TGACv1_096767_AA0321290	TRIAE_CS42_2AL_TGACv1_096767_AA0321290.3	High	NAC
TRIAE_CS42_2AL_TGACv1_096767_AA0321290	TRIAE_CS42_2AL_TGACv1_096767_AA0321290.4	High	NAC
TRIAE_CS42_2AL_TGACv1_096957_AA0322260	TRIAE_CS42_2AL_TGACv1_096957_AA0322260.1	High	NAC
TRIAE_CS42_2AL_TGACv1_096959_AA0322270	TRIAE_CS42_2AL_TGACv1_096959_AA0322270.1	Low	FAR1
TRIAE_CS42_2AL_TGACv1_097044_AA0322780	TRIAE_CS42_2AL_TGACv1_097044_AA0322780.1	High	LFY
TRIAE_CS42_2AL_TGACv1_097193_AA0323350	TRIAE_CS42_2AL_TGACv1_097193_AA0323350.1	High	Nin-like
TRIAE_CS42_2AL_TGACv1_097193_AA0323350	TRIAE_CS42_2AL_TGACv1_097193_AA0323350.2	High	Nin-like
TRIAE_CS42_2AL_TGACv1_097193_AA0323350	TRIAE_CS42_2AL_TGACv1_097193_AA0323350.3	High	Nin-like
TRIAE_CS42_2AL_TGACv1_097193_AA0323350	TRIAE_CS42_2AL_TGACv1_097193_AA0323350.4	High	Nin-like
TRIAE_CS42_2AL_TGACv1_097193_AA0323350	TRIAE_CS42_2AL_TGACv1_097193_AA0323350.5	High	Nin-like
TRIAE_CS42_2AL_TGACv1_097454_AA0324260	TRIAE_CS42_2AL_TGACv1_097454_AA0324260.1	Low	NAC
TRIAE_CS42_2AL_TGACv1_097454_AA0324270	TRIAE_CS42_2AL_TGACv1_097454_AA0324270.1	High	NAC
TRIAE_CS42_2AL_TGACv1_097724_AA0325020	TRIAE_CS42_2AL_TGACv1_097724_AA0325020.1	High	NAC
TRIAE_CS42_2AL_TGACv1_098328_AA0325980	TRIAE_CS42_2AL_TGACv1_098328_AA0325980.1	High	NAC
TRIAE_CS42_2AS_TGACv1_112060_AA0329170	TRIAE_CS42_2AS_TGACv1_112060_AA0329170.1	Low	FAR1
TRIAE_CS42_2AS_TGACv1_112080_AA0329780	TRIAE_CS42_2AS_TGACv1_112080_AA0329780.1	High	CAMTA
TRIAE_CS42_2AS_TGACv1_112080_AA0329780	TRIAE_CS42_2AS_TGACv1_112080_AA0329780.2	High	CAMTA
TRIAE_CS42_2AS_TGACv1_112080_AA0329780	TRIAE_CS42_2AS_TGACv1_112080_AA0329780.3	High	CAMTA
TRIAE_CS42_2AS_TGACv1_112119_AA0330900	TRIAE_CS42_2AS_TGACv1_112119_AA0330900.1	High	NAC
TRIAE_CS42_2AS_TGACv1_112178_AA0332440	TRIAE_CS42_2AS_TGACv1_112178_AA0332440.1	Low	FAR1
TRIAE_CS42_2AS_TGACv1_112185_AA0332570	TRIAE_CS42_2AS_TGACv1_112185_AA0332570.1	High	FAR1
TRIAE_CS42_2AS_TGACv1_112185_AA0332570	TRIAE_CS42_2AS_TGACv1_112185_AA0332570.2	High	FAR1
TRIAE_CS42_2AS_TGACv1_112185_AA0332570	TRIAE_CS42_2AS_TGACv1_112185_AA0332570.3	High	FAR1
TRIAE_CS42_2AS_TGACv1_112190_AA0332650	TRIAE_CS42_2AS_TGACv1_112190_AA0332650.1	Low	FAR1
TRIAE_CS42_2AS_TGACv1_112246_AA0334060	TRIAE_CS42_2AS_TGACv1_112246_AA0334060.1	High	GRAS
TRIAE_CS42_2AS_TGACv1_112268_AA0334520	TRIAE_CS42_2AS_TGACv1_112268_AA0334520.1	High	bHLH
TRIAE_CS42_2AS_TGACv1_112327_AA0335470	TRIAE_CS42_2AS_TGACv1_112327_AA0335470.1	High	FAR1
TRIAE_CS42_2AS_TGACv1_112327_AA0335470	TRIAE_CS42_2AS_TGACv1_112327_AA0335470.2	High	FAR1
TRIAE_CS42_2AS_TGACv1_112355_AA0336290	TRIAE_CS42_2AS_TGACv1_112355_AA0336290.1	High	NAC
TRIAE_CS42_2AS_TGACv1_112355_AA0336290	TRIAE_CS42_2AS_TGACv1_112355_AA0336290.2	High	NAC
TRIAE_CS42_2AS_TGACv1_112355_AA0336290	TRIAE_CS42_2AS_TGACv1_112355_AA0336290.3	High	NAC
TRIAE_CS42_2AS_TGACv1_112367_AA0336510	TRIAE_CS42_2AS_TGACv1_112367_AA0336510.1	High	WRKY
TRIAE_CS42_2AS_TGACv1_112367_AA0336530	TRIAE_CS42_2AS_TGACv1_112367_AA0336530.1	High	WRKY
TRIAE_CS42_2AS_TGACv1_112367_AA0336560	TRIAE_CS42_2AS_TGACv1_112367_AA0336560.1	High	WRKY
TRIAE_CS42_2AS_TGACv1_112367_AA0336570	TRIAE_CS42_2AS_TGACv1_112367_AA0336570.1	High	WRKY
TRIAE_CS42_2AS_TGACv1_112371_AA0336640	TRIAE_CS42_2AS_TGACv1_112371_AA0336640.1	High	TCP
TRIAE_CS42_2AS_TGACv1_112388_AA0336960	TRIAE_CS42_2AS_TGACv1_112388_AA0336960.1	Low	FAR1
TRIAE_CS42_2AS_TGACv1_112388_AA0336980	TRIAE_CS42_2AS_TGACv1_112388_AA0336980.1	High	WRKY
TRIAE_CS42_2AS_TGACv1_112388_AA0336990	TRIAE_CS42_2AS_TGACv1_112388_AA0336990.1	High	WRKY
TRIAE_CS42_2AS_TGACv1_112391_AA0337130	TRIAE_CS42_2AS_TGACv1_112391_AA0337130.1	High	Dof
TRIAE_CS42_2AS_TGACv1_112464_AA0338550	TRIAE_CS42_2AS_TGACv1_112464_AA0338550.1	High	bHLH
TRIAE_CS42_2AS_TGACv1_112490_AA0339050	TRIAE_CS42_2AS_TGACv1_112490_AA0339050.1	High	E2F/DP
TRIAE_CS42_2AS_TGACv1_112550_AA0340610	TRIAE_CS42_2AS_TGACv1_112550_AA0340610.1	High	FAR1
TRIAE_CS42_2AS_TGACv1_112550_AA0340610	TRIAE_CS42_2AS_TGACv1_112550_AA0340610.2	High	FAR1
TRIAE_CS42_2AS_TGACv1_112596_AA0341860	TRIAE_CS42_2AS_TGACv1_112596_AA0341860.1	High	GRAS
TRIAE_CS42_2AS_TGACv1_112616_AA0342330	TRIAE_CS42_2AS_TGACv1_112616_AA0342330.1	High	bHLH
TRIAE_CS42_2AS_TGACv1_112669_AA0343080	TRIAE_CS42_2AS_TGACv1_112669_AA0343080.1	High	BES1
TRIAE_CS42_2AS_TGACv1_112698_AA0343590	TRIAE_CS42_2AS_TGACv1_112698_AA0343590.1	High	CPP
TRIAE_CS42_2AS_TGACv1_112698_AA0343590	TRIAE_CS42_2AS_TGACv1_112698_AA0343590.2	High	CPP
TRIAE_CS42_2AS_TGACv1_112698_AA0343590	TRIAE_CS42_2AS_TGACv1_112698_AA0343590.3	High	CPP
TRIAE_CS42_2AS_TGACv1_112727_AA0344160	TRIAE_CS42_2AS_TGACv1_112727_AA0344160.1	Low	FAR1
TRIAE_CS42_1DL_TGACv1_062229_AA0211020	TRIAE_CS42_1DL_TGACv1_062229_AA0211020.1	High	ARF
TRIAE_CS42_1DL_TGACv1_062229_AA0211020	TRIAE_CS42_1DL_TGACv1_062229_AA0211020.2	High	ARF
TRIAE_CS42_1DL_TGACv1_062229_AA0211020	TRIAE_CS42_1DL_TGACv1_062229_AA0211020.3	High	ARF
TRIAE_CS42_1DL_TGACv1_062287_AA0211840	TRIAE_CS42_1DL_TGACv1_062287_AA0211840.1	High	ARF
TRIAE_CS42_1DL_TGACv1_062287_AA0211840	TRIAE_CS42_1DL_TGACv1_062287_AA0211840.2	High	ARF
TRIAE_CS42_1DL_TGACv1_063230_AA0225280	TRIAE_CS42_1DL_TGACv1_063230_AA0225280.1	High	ARF
TRIAE_CS42_2AL_TGACv1_093659_AA0284740	TRIAE_CS42_2AL_TGACv1_093659_AA0284740.1	High	ARF
TRIAE_CS42_2AL_TGACv1_093659_AA0284740	TRIAE_CS42_2AL_TGACv1_093659_AA0284740.2	High	ARF
TRIAE_CS42_2AL_TGACv1_093753_AA0286040	TRIAE_CS42_2AL_TGACv1_093753_AA0286040.1	High	ARF
TRIAE_CS42_2AL_TGACv1_093753_AA0286040	TRIAE_CS42_2AL_TGACv1_093753_AA0286040.2	High	ARF
TRIAE_CS42_2AL_TGACv1_093753_AA0286040	TRIAE_CS42_2AL_TGACv1_093753_AA0286040.3	High	ARF
TRIAE_CS42_2AL_TGACv1_093753_AA0286040	TRIAE_CS42_2AL_TGACv1_093753_AA0286040.4	High	ARF
TRIAE_CS42_2AL_TGACv1_094693_AA0301690	TRIAE_CS42_2AL_TGACv1_094693_AA0301690.1	High	ARF
TRIAE_CS42_2AL_TGACv1_094729_AA0302220	TRIAE_CS42_2AL_TGACv1_094729_AA0302220.1	High	ARF
TRIAE_CS42_2AL_TGACv1_095131_AA0307260	TRIAE_CS42_2AL_TGACv1_095131_AA0307260.1	High	ARF
TRIAE_CS42_2AL_TGACv1_095131_AA0307260	TRIAE_CS42_2AL_TGACv1_095131_AA0307260.2	High	ARF
TRIAE_CS42_1DL_TGACv1_061085_AA0184590	TRIAE_CS42_1DL_TGACv1_061085_AA0184590.1	High	B3
TRIAE_CS42_1DL_TGACv1_061646_AA0200830	TRIAE_CS42_1DL_TGACv1_061646_AA0200830.1	Low	B3
TRIAE_CS42_1DL_TGACv1_061714_AA0202230	TRIAE_CS42_1DL_TGACv1_061714_AA0202230.1	High	B3
TRIAE_CS42_1DL_TGACv1_062272_AA0211680	TRIAE_CS42_1DL_TGACv1_062272_AA0211680.1	High	B3
TRIAE_CS42_1DL_TGACv1_063400_AA0226920	TRIAE_CS42_1DL_TGACv1_063400_AA0226920.1	High	B3
TRIAE_CS42_1DL_TGACv1_063695_AA0229990	TRIAE_CS42_1DL_TGACv1_063695_AA0229990.1	High	B3
TRIAE_CS42_1DL_TGACv1_063866_AA0231370	TRIAE_CS42_1DL_TGACv1_063866_AA0231370.1	Low	B3
TRIAE_CS42_1DL_TGACv1_064017_AA0232130	TRIAE_CS42_1DL_TGACv1_064017_AA0232130.1	Low	B3
TRIAE_CS42_1DL_TGACv1_064137_AA0232800	TRIAE_CS42_1DL_TGACv1_064137_AA0232800.1	High	B3
TRIAE_CS42_1DL_TGACv1_064506_AA0234730	TRIAE_CS42_1DL_TGACv1_064506_AA0234730.1	Low	B3
TRIAE_CS42_1DS_TGACv1_080159_AA0241820	TRIAE_CS42_1DS_TGACv1_080159_AA0241820.1	Low	B3
TRIAE_CS42_1DS_TGACv1_080685_AA0252230	TRIAE_CS42_1DS_TGACv1_080685_AA0252230.1	Low	B3
TRIAE_CS42_1DS_TGACv1_080729_AA0252880	TRIAE_CS42_1DS_TGACv1_080729_AA0252880.1	Low	B3
TRIAE_CS42_1DS_TGACv1_080997_AA0256560	TRIAE_CS42_1DS_TGACv1_080997_AA0256560.1	High	B3
TRIAE_CS42_1DS_TGACv1_080997_AA0256560	TRIAE_CS42_1DS_TGACv1_080997_AA0256560.2	High	B3
TRIAE_CS42_1DS_TGACv1_080997_AA0256560	TRIAE_CS42_1DS_TGACv1_080997_AA0256560.3	High	B3
TRIAE_CS42_1DS_TGACv1_081019_AA0256850	TRIAE_CS42_1DS_TGACv1_081019_AA0256850.1	High	B3
TRIAE_CS42_1DS_TGACv1_081019_AA0256850	TRIAE_CS42_1DS_TGACv1_081019_AA0256850.2	High	B3
TRIAE_CS42_1DS_TGACv1_081019_AA0256850	TRIAE_CS42_1DS_TGACv1_081019_AA0256850.3	High	B3
TRIAE_CS42_1DS_TGACv1_081383_AA0260410	TRIAE_CS42_1DS_TGACv1_081383_AA0260410.1	Low	B3
TRIAE_CS42_2AL_TGACv1_093000_AA0269160	TRIAE_CS42_2AL_TGACv1_093000_AA0269160.1	High	B3
TRIAE_CS42_2AL_TGACv1_093620_AA0283790	TRIAE_CS42_2AL_TGACv1_093620_AA0283790.1	Low	B3
TRIAE_CS42_2AL_TGACv1_093939_AA0289730	TRIAE_CS42_2AL_TGACv1_093939_AA0289730.1	Low	B3
TRIAE_CS42_2AL_TGACv1_094381_AA0296780	TRIAE_CS42_2AL_TGACv1_094381_AA0296780.1	Low	B3
TRIAE_CS42_2AL_TGACv1_094381_AA0296780	TRIAE_CS42_2AL_TGACv1_094381_AA0296780.2	Low	B3
TRIAE_CS42_2AL_TGACv1_094451_AA0297830	TRIAE_CS42_2AL_TGACv1_094451_AA0297830.1	High	B3
TRIAE_CS42_2AL_TGACv1_094620_AA0300650	TRIAE_CS42_2AL_TGACv1_094620_AA0300650.1	High	B3
TRIAE_CS42_2AL_TGACv1_096059_AA0316940	TRIAE_CS42_2AL_TGACv1_096059_AA0316940.1	High	B3
TRIAE_CS42_2AL_TGACv1_096334_AA0318700	TRIAE_CS42_2AL_TGACv1_096334_AA0318700.1	High	B3
TRIAE_CS42_2AS_TGACv1_112219_AA0333560	TRIAE_CS42_2AS_TGACv1_112219_AA0333560.1	High	B3
TRIAE_CS42_2AS_TGACv1_112219_AA0333560	TRIAE_CS42_2AS_TGACv1_112219_AA0333560.2	High	B3
TRIAE_CS42_2AS_TGACv1_112362_AA0336350	TRIAE_CS42_2AS_TGACv1_112362_AA0336350.1	High	B3
TRIAE_CS42_2AS_TGACv1_112561_AA0341120	TRIAE_CS42_2AS_TGACv1_112561_AA0341120.1	Low	B3
TRIAE_CS42_2AS_TGACv1_112619_AA0342450	TRIAE_CS42_2AS_TGACv1_112619_AA0342450.1	High	B3
TRIAE_CS42_1DL_TGACv1_061726_AA0202460	TRIAE_CS42_1DL_TGACv1_061726_AA0202460.1	High	AP2
TRIAE_CS42_1DL_TGACv1_061726_AA0202460	TRIAE_CS42_1DL_TGACv1_061726_AA0202460.2	High	AP2
TRIAE_CS42_1DS_TGACv1_080564_AA0250290	TRIAE_CS42_1DS_TGACv1_080564_AA0250290.3	High	AP2
TRIAE_CS42_1DS_TGACv1_080564_AA0250290	TRIAE_CS42_1DS_TGACv1_080564_AA0250290.4	High	AP2
TRIAE_CS42_2AL_TGACv1_093504_AA0281410	TRIAE_CS42_2AL_TGACv1_093504_AA0281410.1	High	AP2
TRIAE_CS42_2AL_TGACv1_093504_AA0281410	TRIAE_CS42_2AL_TGACv1_093504_AA0281410.2	High	AP2
TRIAE_CS42_2AL_TGACv1_094690_AA0301600	TRIAE_CS42_2AL_TGACv1_094690_AA0301600.1	High	AP2
TRIAE_CS42_2AL_TGACv1_097448_AA0324210	TRIAE_CS42_2AL_TGACv1_097448_AA0324210.1	High	AP2
TRIAE_CS42_1DL_TGACv1_062173_AA0209980	TRIAE_CS42_1DL_TGACv1_062173_AA0209980.1	High	AP2
TRIAE_CS42_1DS_TGACv1_080564_AA0250290	TRIAE_CS42_1DS_TGACv1_080564_AA0250290.5	High	AP2
[truncated: 8,305 more rows]
