# Supplementary material for: Genome-Wide Sequence and Expression Analysis of the NAC Transcription Factor Family in Polyploid Wheat
Source: G3 (Bethesda). 2017 Jul 11;7(9):3019–29. doi: 10.1534/g3.117.043679 (PMC5592928; doi:10.1534/g3.117.043679)
Supplement: Supplementary file 6 [file 3019TableS3.xlsx]

## Sheet: Sheet1
Table S3. Wheat transcription factor distribution across chromosomes.
Chromosome	AP2	ARF	ARR-B	B3	BBR-BPC	BES1	bHLH	bZIP	C2H2	C3H	CAMTA	CO-like	CPP	DBB	Dof	E2F/DP	EIL	ERF	FAR1	G2-like	GATA	GeBP	GRAS	GRF	HB-other	HB-PHD	HD-ZIP	HRT-like	HSF	LBD	LFY	LSD	MIKC	M-type	MYB	MYB_related	NAC	NF-X1	NF-YA	NF-YB	NF-YC	Nin-like	RAV	S1Fa-like	SBP	SRS	STAT	TALE	TCP
1A	3	2	0	8	0	0	10	10	12	4	0	0	4	0	4	1	0	17	19	5	6	0	9	0	8	0	4	0	3	3	0	1	5	0	18	16	7	0	0	1	3	0	3	0	1	1	0	4	1
1B	2	1	0	7	0	0	11	8	12	5	0	0	6	0	4	1	0	19	12	6	6	0	7	0	3	1	4	0	2	4	0	1	6	4	20	24	8	0	0	1	2	0	3	0	1	1	1	3	1
1D	3	3	0	8	0	0	12	7	13	6	0	0	4	0	3	1	0	21	9	5	6	0	9	0	3	1	4	0	2	4	0	1	8	2	22	14	7	0	0	1	2	0	4	0	1	1	0	4	1
2A	3	5	0	11	0	1	21	12	16	5	3	1	1	3	7	2	1	24	17	5	6	1	8	3	2	0	5	1	4	3	1	0	4	2	26	3	40	0	1	2	0	3	0	1	2	0	0	1	3
2B	4	5	0	10	0	1	21	10	15	6	3	1	1	2	7	2	1	29	17	6	6	1	9	3	0	0	6	1	2	2	1	0	4	3	21	5	38	0	0	2	0	2	0	1	2	0	0	1	3
2D	3	5	0	12	0	1	22	12	15	4	2	1	1	2	8	2	2	35	13	6	4	1	8	3	1	0	6	1	3	2	1	0	4	1	26	4	38	0	1	2	0	3	0	1	3	0	0	1	3
3A	1	5	3	14	0	0	26	14	19	13	1	0	1	1	10	1	1	12	6	5	3	3	6	0	2	1	3	0	5	7	0	0	3	5	21	12	23	1	0	6	1	2	3	0	1	1	0	2	2
3B	2	5	2	16	0	2	33	14	23	9	1	0	2	1	8	1	1	10	10	5	3	1	6	0	4	1	5	0	8	7	0	1	4	14	24	9	23	0	0	8	1	2	5	0	1	1	0	1	3
3D	2	5	2	19	0	2	32	11	21	10	1	0	1	1	7	1	1	10	6	5	3	2	6	0	6	0	5	0	4	8	0	1	4	9	22	13	24	1	0	6	2	1	3	0	1	1	0	1	4
4A	3	0	1	31	2	0	17	10	13	3	1	1	1	0	3	1	1	14	20	5	4	2	19	3	3	0	7	0	4	8	0	0	2	3	17	5	19	0	2	1	3	0	0	0	1	0	0	7	4
4B	4	0	0	21	1	1	39	10	17	2	1	1	1	0	2	1	1	11	15	5	4	2	19	2	3	0	5	0	7	10	0	0	5	2	15	2	14	0	2	1	2	2	2	0	0	0	0	7	2
4D	4	0	1	20	1	1	33	12	18	3	1	1	1	0	2	1	1	8	12	7	4	1	19	2	3	0	6	0	5	10	0	0	5	3	16	3	13	0	2	1	2	2	2	0	0	0	0	7	2
5A	3	1	0	20	0	0	38	20	35	4	0	1	2	1	5	1	1	25	19	9	3	1	10	0	0	0	7	0	6	3	0	0	6	1	16	11	21	0	3	0	1	2	2	0	1	1	0	4	6
5B	3	1	0	22	0	1	33	16	30	3	1	1	2	1	5	1	2	32	13	8	2	0	9	0	0	0	6	0	4	2	0	3	5	3	13	9	20	0	3	0	2	1	0	0	2	0	0	3	6
5D	4	1	0	24	0	0	25	20	36	5	1	1	2	1	5	1	1	29	10	8	2	2	8	0	0	0	8	0	6	1	0	2	7	2	12	10	19	0	3	0	1	1	0	0	2	1	0	3	7
6A	3	3	5	4	0	1	20	9	10	7	0	5	0	3	3	2	1	26	10	9	3	2	2	3	5	0	5	0	1	2	0	0	5	1	12	6	14	0	1	3	1	2	0	0	3	0	0	1	1
6B	7	3	7	4	0	2	16	9	9	6	0	5	0	3	3	2	1	27	10	10	3	2	2	3	7	1	6	0	1	2	0	0	6	1	15	7	14	0	1	3	1	2	0	0	3	0	0	1	3
6D	4	3	4	6	0	1	18	6	10	8	0	5	0	3	3	1	1	26	8	6	4	2	3	3	2	0	6	0	1	1	0	0	5	3	14	6	9	0	1	3	1	2	0	0	3	0	0	1	3
7A	4	5	8	12	1	1	20	13	14	6	0	5	1	1	0	1	1	15	21	13	2	1	3	2	5	0	7	0	3	2	0	1	8	10	18	15	24	2	0	4	4	3	0	0	7	2	0	3	1
7B	3	4	7	8	0	1	21	15	10	4	0	5	1	2	1	1	1	11	17	13	1	2	3	1	3	0	3	0	3	1	0	1	8	12	16	18	26	2	0	4	6	2	0	0	5	2	0	1	1
7D	4	5	7	15	1	1	19	13	18	7	0	6	2	1	1	1	1	21	18	12	2	2	4	2	4	0	5	0	3	1	0	1	9	17	18	25	37	2	0	2	5	2	0	0	8	2	0	3	1
Unassigned	2	3	1	17	0	1	16	13	12	7	1	0	1	0	1	0	1	13	13	4	4	1	6	1	3	0	4	0	4	5	0	1	5	0	13	6	15	0	1	4	1	0	0	0	2	1	0	2	4
[truncated: 8 more columns]
