# Supplementary material for: Genome-Wide Sequence and Expression Analysis of the NAC Transcription Factor Family in Polyploid Wheat
Source: G3 (Bethesda). 2017 Jul 11;7(9):3019–29. doi: 10.1534/g3.117.043679 (PMC5592928; doi:10.1534/g3.117.043679)
Supplement: Supplementary file 7 [file 3019TableS4.xlsx]

## Sheet: Sheet1
Table S4. Wheat, barley and rice NAC orthologues.
	Wheat gene ID						BLAST percentage ID				BLAST percentage ID
Wheat name	A	B	D	NAC group for wheat	Barley name	Barley orthologue (from reciprocal BLAST)	wheat to barley	barley to wheat	Rice name	Rice orthologue (from reciprocal BLAST)	wheat to rice	rice to wheat
-	TRIAE_CS42_1AL_TGACv1_000129_AA0004160 and TRIAE_CS42_5AL_TGACv1_377220_AA1245090	TRIAE_CS42_1BL_TGACv1_032935_AA0135600	TRIAE_CS42_U_TGACv1_640717_AA2070800	-	-	-	-	-	-	-	-	-
-	TRIAE_CS42_1AL_TGACv1_000555_AA0014640	TRIAE_CS42_1BL_TGACv1_033928_AA0142640	TRIAE_CS42_1DL_TGACv1_063379_AA0226840	NAC-b	-	MLOC_58950.3	96.07	96.15	ONAC121	LOC_Os10g42130.1	84.4633	85.48
-	TRIAE_CS42_1AL_TGACv1_001239_AA0027650	TRIAE_CS42_1BL_TGACv1_031320_AA0111530	TRIAE_CS42_1DL_TGACv1_061395_AA0194070	NAC-e	-	MLOC_69621.2	94.8933	95.59	ONAC087	LOC_Os05g34600.1	96.97	97.17
-	TRIAE_CS42_1AL_TGACv1_002139_AA0039010	TRIAE_CS42_1BL_TGACv1_032010_AA0124150	TRIAE_CS42_1DL_TGACv1_061442_AA0195380	NAC-a	-	MLOC_63743.1	94.5733	95.47	ONAC088	LOC_Os05g34830.1	85.39	85.49
-	TRIAE_CS42_1AL_TGACv1_002630_AA0043960	TRIAE_CS42_1BL_TGACv1_031175_AA0109210	TRIAE_CS42_1DL_TGACv1_063105_AA0223920	NAC-e	-	-	-	-	ONAC012	LOC_Os05g37080.1	86.9467	88.05
-	TRIAE_CS42_1AL_TGACv1_002630_AA0043970	TRIAE_CS42_1BL_TGACv1_031175_AA0109220	TRIAE_CS42_1DL_TGACv1_064163_AA0233000	NAC-e	-	MLOC_7757.1	86.75	87.12	-	-	-	-
-	TRIAE_CS42_1AS_TGACv1_019344_AA0065130		TRIAE_CS42_1DS_TGACv1_080269_AA0244760	NAC-h	-	-	-	-	-	-	-	-
-			TRIAE_CS42_1DS_TGACv1_080190_AA0242510	NAC-e	-	-	-	-	-	-	-	-
-		TRIAE_CS42_1BS_TGACv1_050349_AA0170970		NAC-h	-	-	-	-	-	-	-	-
-		TRIAE_CS42_1BS_TGACv1_050618_AA0173950		NAC-h	-	-	-	-	-	-	-	-
-	TRIAE_CS42_2AL_TGACv1_093024_AA0269720	TRIAE_CS42_2BL_TGACv1_129453_AA0384480	TRIAE_CS42_2DL_TGACv1_157932_AA0502440	NAC-c	-	-	-	-	-	-	-	-
-	TRIAE_CS42_2AL_TGACv1_093024_AA0269730	TRIAE_CS42_2BL_TGACv1_129453_AA0384460	TRIAE_CS42_2DL_TGACv1_157932_AA0502410	NAC-c	-	-	-	-	-	-	-	-
-	TRIAE_CS42_2AL_TGACv1_093056_AA0270770	TRIAE_CS42_2BL_TGACv1_129331_AA0379020 and TRIAE_CS42_2BL_TGACv1_130526_AA0412920	TRIAE_CS42_2DL_TGACv1_158281_AA0514570 and TRIAE_CS42_2DL_TGACv1_158281_AA0514600	NAC-h	-	MLOC_36501.1	85.47	85.97	-	-	-	-
-	TRIAE_CS42_2AL_TGACv1_093073_AA0271250	TRIAE_CS42_2BL_TGACv1_130376_AA0409870		NAC-h	-	-	-	-	-	-	-	-
-	TRIAE_CS42_2AL_TGACv1_093319_AA0277330	TRIAE_CS42_2BL_TGACv1_133608_AA0442820	TRIAE_CS42_2DL_TGACv1_158215_AA0512750	NAC-d	-	-	-	-	OsNAC2/ONAC004	LOC_Os04g38720.1	89.0133	90.22
-	TRIAE_CS42_2AL_TGACv1_093527_AA0281800			NAC-c	-	-	-	-	-	-	-	-
-	TRIAE_CS42_2AL_TGACv1_093527_AA0281830		TRIAE_CS42_2DL_TGACv1_157932_AA0502430	NAC-c	-	MLOC_66083.2	88.15	89.99	-	-	-	-
-	TRIAE_CS42_2AL_TGACv1_093527_AA0281840			NAC-c	-	-	-	-	-	-	-	-
-	TRIAE_CS42_2AL_TGACv1_093618_AA0283710	TRIAE_CS42_2BL_TGACv1_129841_AA0397780	TRIAE_CS42_2DL_TGACv1_158540_AA0521450	NAC-b	-	MLOC_36942.1	89.16	87.67	-	-	-	-
-	TRIAE_CS42_2AL_TGACv1_093769_AA0286390 and TRIAE_CS42_2AL_TGACv1_094902_AA0304710	TRIAE_CS42_U_TGACv1_642085_AA2111000	TRIAE_CS42_2DL_TGACv1_159242_AA0535250	NAC-g	-	MLOC_43934.1	86.5	86.84	-	-	-	-
-	TRIAE_CS42_2AL_TGACv1_094054_AA0291690	TRIAE_CS42_2BL_TGACv1_129772_AA0395410	TRIAE_CS42_2DL_TGACv1_157948_AA0503060	NAC-h	-	-	-	-	-	LOC_Os04g42940.1	77.1133	77.16
-	TRIAE_CS42_2AL_TGACv1_094099_AA0292580	TRIAE_CS42_2BL_TGACv1_130718_AA0416560		NAC-g	-	-	-	-	-	-	-	-
-	TRIAE_CS42_2AL_TGACv1_094196_AA0294120	TRIAE_CS42_2BL_TGACv1_130336_AA0409040	TRIAE_CS42_2DL_TGACv1_159403_AA0537810	NAC-g	-	-	-	-	-	-	-	-
-	TRIAE_CS42_2AL_TGACv1_094353_AA0296380			NAC-c	-	-	-	-	-	-	-	-
-	TRIAE_CS42_2AL_TGACv1_094562_AA0299690			NAC-b	-	-	-	-	-	-	-	-
-	TRIAE_CS42_2AL_TGACv1_094614_AA0300490	TRIAE_CS42_2BL_TGACv1_131250_AA0424990	TRIAE_CS42_2DL_TGACv1_158876_AA0527740	NAC-a	HvNAC026	MLOC_15681.2	96.7633	97.67	ONAC028	LOC_Os02g34970.1	79.4933	78.96
-	TRIAE_CS42_2AL_TGACv1_094906_AA0304730	TRIAE_CS42_2BL_TGACv1_129321_AA0378540	TRIAE_CS42_2DL_TGACv1_158467_AA0519480	NAC-d	-	-	-	-	-	-	-	-
-	TRIAE_CS42_2AL_TGACv1_095101_AA0306920	TRIAE_CS42_2BL_TGACv1_132584_AA0438520	TRIAE_CS42_U_TGACv1_642816_AA2123650	NAC-d	HvNAC032	MLOC_12466.1	90.79	91.77	ONAC008	LOC_Os04g43560.1	87.67	82.81
-	TRIAE_CS42_2AL_TGACv1_095189_AA0308120		TRIAE_CS42_2DL_TGACv1_159017_AA0530680	NAC-b	-	-	-	-	-	-	-	-
-	TRIAE_CS42_2AL_TGACv1_095427_AA0310620	TRIAE_CS42_2BL_TGACv1_130049_AA0402430	TRIAE_CS42_2DL_TGACv1_159001_AA0530380	NAC-c	-	MLOC_19175.1	97.7933	98.12	-	-	-	-
-	TRIAE_CS42_2AL_TGACv1_096039_AA0316870		TRIAE_CS42_2DL_TGACv1_158027_AA0506390	NAC-b	-	-	-	-	-	-	-	-
-	TRIAE_CS42_2AL_TGACv1_096739_AA0321050			NAC-h	-	-	-	-	-	-	-	-
-	TRIAE_CS42_2AL_TGACv1_096739_AA0321060	TRIAE_CS42_2BL_TGACv1_129317_AA0378290	TRIAE_CS42_2DL_TGACv1_158457_AA0519140	NAC-h	-	-	-	-	-	-	-	-
-	TRIAE_CS42_2AL_TGACv1_096767_AA0321290	TRIAE_CS42_2BL_TGACv1_131738_AA0431450	TRIAE_CS42_2DL_TGACv1_160392_AA0550080	NAC-g	-	MLOC_11732.1	87.53	89.03	-	-	-	-
-	TRIAE_CS42_2AL_TGACv1_096957_AA0322260	TRIAE_CS42_2BL_TGACv1_134090_AA0443670		NAC-g	-	-	-	-	-	-	-	-
-	TRIAE_CS42_2AL_TGACv1_097454_AA0324270	TRIAE_CS42_2BL_TGACv1_130526_AA0412910	TRIAE_CS42_2DL_TGACv1_159901_AA0544090 and TRIAE_CS42_2DL_TGACv1_158281_AA0514580 and TRIAE_CS42_2DL_TGACv1_158281_AA0514560	NAC-h	-	MLOC_11017.1	89.3933	90.44	-	-	-	-
-	TRIAE_CS42_2AL_TGACv1_097724_AA0325020	TRIAE_CS42_2BL_TGACv1_130526_AA0412930	TRIAE_CS42_2DL_TGACv1_158281_AA0514620	NAC-h	-	-	-	-	-	-	-	-
-	TRIAE_CS42_2AL_TGACv1_098328_AA0325980			NAC-b	-	-	-	-	-	-	-	-
-	TRIAE_CS42_2AS_TGACv1_112119_AA0330900	TRIAE_CS42_U_TGACv1_641123_AA2086190	TRIAE_CS42_2DS_TGACv1_177136_AA0566150	NAC-d	-	MLOC_65714.1	88.8967	89.52	-	-	-	-
-	TRIAE_CS42_2AS_TGACv1_112355_AA0336290	TRIAE_CS42_2BS_TGACv1_146608_AA0469420	TRIAE_CS42_2DS_TGACv1_178661_AA0599190	-	-	-	-	-	ONAC061	LOC_Os10g21560.1	74.3067	74.89
-	TRIAE_CS42_2AS_TGACv1_112832_AA0345940	TRIAE_CS42_2BS_TGACv1_147904_AA0488850 and TRIAE_CS42_2BS_TGACv1_146243_AA0460100	TRIAE_CS42_2DS_TGACv1_177687_AA0582480	NAC-a	-	-	-	-	ONAC103	LOC_Os07g48450.1	87.01	89.32
-	TRIAE_CS42_2AS_TGACv1_112895_AA0347030	TRIAE_CS42_2BS_TGACv1_147190_AA0479460	TRIAE_CS42_2DS_TGACv1_178152_AA0591930	NAC-e	-	-	-	-	-	-	-	-
-	TRIAE_CS42_2AS_TGACv1_112895_AA0347040	TRIAE_CS42_2BS_TGACv1_147190_AA0479450	TRIAE_CS42_2DS_TGACv1_178152_AA0591920	NAC-e	-	-	-	-	-	-	-	-
-	TRIAE_CS42_2AS_TGACv1_112895_AA0347050	TRIAE_CS42_2BS_TGACv1_147190_AA0479440	TRIAE_CS42_2DS_TGACv1_178152_AA0591910	NAC-e	-	MLOC_60079.1	90.8367	91.85	-	-	-	-
TaNAC29	TRIAE_CS42_2AS_TGACv1_113086_AA0351020		TRIAE_CS42_2DS_TGACv1_177511_AA0579140	NAC-a	-	-	-	-	-	-	-	-
-	TRIAE_CS42_2AS_TGACv1_113123_AA0351630	TRIAE_CS42_2BS_TGACv1_146614_AA0469500	TRIAE_CS42_2DS_TGACv1_177294_AA0572540	NAC-d	HvNAC008	MLOC_65400.1	90.0233	90.56	-	-	-	-
TaNAM2	TRIAE_CS42_2AS_TGACv1_113243_AA0353410	TRIAE_CS42_2BS_TGACv1_145996_AA0452240	TRIAE_CS42_2DS_TGACv1_179582_AA0608070	NAC-a	HvNAC030	MLOC_8116.1	96.2067	96.48	ONAC010	LOC_Os07g37920.1	84.6067	85.4
TaGRAB2	TRIAE_CS42_2AS_TGACv1_113796_AA0360690 and TRIAE_CS42_2AS_TGACv1_113960_AA0362760	TRIAE_CS42_2BS_TGACv1_147330_AA0481860 and TRIAE_CS42_2BS_TGACv1_148552_AA0493700 and TRIAE_CS42_2BS_TGACv1_146451_AA0465500	TRIAE_CS42_2DS_TGACv1_177136_AA0566130	NAC-d	-	-	-	-	-	-	-	-
-		TRIAE_CS42_2BL_TGACv1_129317_AA0378300		NAC-h	-	-	-	-	-	-	-	-
-		TRIAE_CS42_2BL_TGACv1_129453_AA0384490 and TRIAE_CS42_2BL_TGACv1_129453_AA0384510	TRIAE_CS42_2DL_TGACv1_157932_AA0502420	NAC-c	-	-	-	-	-	-	-	-
-		TRIAE_CS42_2BL_TGACv1_130088_AA0403570	TRIAE_CS42_2DL_TGACv1_158349_AA0516330	NAC-g	-	-	-	-	-	-	-	-
-	TRIAE_CS42_U_TGACv1_644278_AA2138500	TRIAE_CS42_2BL_TGACv1_130441_AA0411470	TRIAE_CS42_2DL_TGACv1_160108_AA0546880	NAC-c	-	MLOC_15746.1	94.8033	95	-	-	-	-
-		TRIAE_CS42_2BL_TGACv1_130517_AA0412720	TRIAE_CS42_2DL_TGACv1_157958_AA0503600	NAC-f	-	MLOC_64644.2	87.355	87.46	-	-	-	-
-		TRIAE_CS42_2BL_TGACv1_130517_AA0412730	TRIAE_CS42_2DL_TGACv1_157958_AA0503610	NAC-f	-	-	-	-	-	-	-	-
-	TRIAE_CS42_U_TGACv1_642023_AA2109710	TRIAE_CS42_2BL_TGACv1_131445_AA0427830		-	-	-	-	-	-	-	-	-
-			TRIAE_CS42_2DS_TGACv1_177206_AA0568970	NAC-d	-	-	-	-	-	-	-	-
-			TRIAE_CS42_2DS_TGACv1_177468_AA0577950	NAC-h	-	-	-	-	-	-	-	-
-	TRIAE_CS42_3AL_TGACv1_193591_AA0614330 and TRIAE_CS42_3AL_TGACv1_197688_AA0666980	TRIAE_CS42_3B_TGACv1_226537_AA0817490	TRIAE_CS42_3DL_TGACv1_252366_AA0889570	NAC-h	-	-	-	-	-	-	-	-
-	TRIAE_CS42_3AL_TGACv1_193687_AA0617570	TRIAE_CS42_3B_TGACv1_228791_AA0827560	TRIAE_CS42_3DL_TGACv1_250314_AA0865990	-	-	-	-	-	-	-	-	-
-	TRIAE_CS42_3AL_TGACv1_193821_AA0620220	TRIAE_CS42_3B_TGACv1_221325_AA0737380	TRIAE_CS42_3DL_TGACv1_249309_AA0844910	NAC-e	-	-	-	-	ONAC059	LOC_Os01g64310.1	85.4033	87.72
TaNAC6	TRIAE_CS42_3AL_TGACv1_194123_AA0626970	TRIAE_CS42_3B_TGACv1_221115_AA0730720	TRIAE_CS42_3DL_TGACv1_249320_AA0845360	NAC-a	HvNAC006	MLOC_59162.1	95.77	96.07	OsNAC6/ONAC048	LOC_Os01g66120.1	84.6433	84.39
-	TRIAE_CS42_3AL_TGACv1_194422_AA0632800		TRIAE_CS42_3DL_TGACv1_250260_AA0865120	NAC-g	-	MLOC_66537.1	94.385	94.53	-	-	-	-
-	TRIAE_CS42_3AL_TGACv1_194515_AA0634650	TRIAE_CS42_3B_TGACv1_224374_AA0795970	TRIAE_CS42_3DL_TGACv1_250858_AA0874200	NAC-h	HvNAC043	MLOC_81739.1	93.16	92.21	-	-	-	-
-	TRIAE_CS42_3AL_TGACv1_194515_AA0634660	TRIAE_CS42_3B_TGACv1_224374_AA0795940	TRIAE_CS42_3DL_TGACv1_250858_AA0874220	NAC-h	-	-	-	-	-	-	-	-
-	TRIAE_CS42_3AL_TGACv1_194515_AA0634790		TRIAE_CS42_3DL_TGACv1_250878_AA0874550	NAC-h	-	-	-	-	ONAC038	LOC_Os01g71790.1	80.61	81.09
-	TRIAE_CS42_3AL_TGACv1_194533_AA0635200		TRIAE_CS42_3DL_TGACv1_249859_AA0857540	NAC-h	-	-	-	-	-	-	-	-
-	TRIAE_CS42_3AL_TGACv1_194680_AA0637700	TRIAE_CS42_3B_TGACv1_221063_AA0728830	TRIAE_CS42_3DL_TGACv1_251703_AA0884000	NAC-e	HvNAC012	MLOC_57215.1	94.2767	94.91	ONAC075	LOC_Os01g66490.1	83.85	83.97
TaNAC4	TRIAE_CS42_3AL_TGACv1_194893_AA0641610	TRIAE_CS42_3B_TGACv1_223174_AA0777390	TRIAE_CS42_3DL_TGACv1_250625_AA0871190	NAC-a	HvNAC004	MLOC_70929.1	93.9667	94.05	OsNAC4/ONAC068	LOC_Os01g60020.1	81.17	80.04
-	TRIAE_CS42_3AL_TGACv1_194924_AA0642200	TRIAE_CS42_3B_TGACv1_223234_AA0778600	TRIAE_CS42_3DL_TGACv1_253070_AA0893220	NAC-f	HvNAC044	MLOC_43961.1	86.8433	87.59	-	-	-	-
-	TRIAE_CS42_3AL_TGACv1_195139_AA0645220	TRIAE_CS42_3B_TGACv1_221306_AA0736740	TRIAE_CS42_3DL_TGACv1_249186_AA0840740	NAC-g	HvNAC039	MLOC_60429.1	92.15	92.51	ONAC073	LOC_Os01g48130.1	83.2233	83.19
-	TRIAE_CS42_3AL_TGACv1_196011_AA0656470	TRIAE_CS42_3B_TGACv1_221052_AA0728390	TRIAE_CS42_3DL_TGACv1_249613_AA0852500	NAC-h	-	-	-	-	-	-	-	-
-	TRIAE_CS42_3AL_TGACv1_196147_AA0657630	TRIAE_CS42_3B_TGACv1_221188_AA0733380	TRIAE_CS42_3DL_TGACv1_249294_AA0844470	NAC-h	HvNAC040	MLOC_74840.1	88.4033	85.87	-	-	-	-
-	TRIAE_CS42_3AL_TGACv1_197741_AA0667100			NAC-h	-	-	-	-	-	-	-	-
-	TRIAE_CS42_3AS_TGACv1_210609_AA0675620	TRIAE_CS42_3B_TGACv1_224197_AA0793760	TRIAE_CS42_3DS_TGACv1_271551_AA0902410	NAC-g	-	MLOC_75795.3	95.9267	96.2	ONAC003	LOC_Os01g09550.2	85.53	85.77
-	TRIAE_CS42_3AS_TGACv1_210843_AA0680070	TRIAE_CS42_3B_TGACv1_224541_AA0797800	TRIAE_CS42_3DS_TGACv1_271491_AA0900310	NAC-a	-	-	-	-	-	-	-	-
-	TRIAE_CS42_3AS_TGACv1_210879_AA0680650	TRIAE_CS42_3B_TGACv1_220886_AA0722540		NAC-d	HvNAC019	MLOC_72737.1	92.635	93.72	-	-	-	-
-	TRIAE_CS42_3AS_TGACv1_211517_AA0690980	TRIAE_CS42_3B_TGACv1_223246_AA0778890		NAC-h	-	MLOC_6901.1	89.02	89.23	-	-	-	-
-	TRIAE_CS42_3AS_TGACv1_211816_AA0694580		TRIAE_CS42_7DS_TGACv1_623904_AA2057290	NAC-h	-	-	-	-	-	-	-	-
TaNAC8	TRIAE_CS42_3AS_TGACv1_213187_AA0705860	TRIAE_CS42_3B_TGACv1_220765_AA0718590	TRIAE_CS42_3DS_TGACv1_272013_AA0913110	NAC-b	HvNAC035	MLOC_6066.1	94.3733	94.51	OsNAC8/ONAC074	LOC_Os01g15640.1	80.8333	78.77
-		TRIAE_CS42_3B_TGACv1_220886_AA0722550	TRIAE_CS42_3DS_TGACv1_273115_AA0928510	NAC-d	-	MLOC_63121.1	87.125	86.38	-	-	-	-
-		TRIAE_CS42_3B_TGACv1_222551_AA0766670	TRIAE_CS42_3DL_TGACv1_253556_AA0894940	NAC-h	-	-	-	-	-	-	-	-
-		TRIAE_CS42_3B_TGACv1_224002_AA0790780	TRIAE_CS42_3DS_TGACv1_272250_AA0917810 and TRIAE_CS42_3DS_TGACv1_272946_AA0926870	NAC-a	-	-	-	-	-	-	-	-
-		TRIAE_CS42_3B_TGACv1_226184_AA0814580	TRIAE_CS42_3DL_TGACv1_250490_AA0869100	NAC-h	-	-	-	-	-	-	-	-
-		TRIAE_CS42_3B_TGACv1_226537_AA0817500		NAC-h	-	-	-	-	-	-	-	-
-		TRIAE_CS42_3B_TGACv1_227158_AA0821770		NAC-h	-	-	-	-	-	-	-	-
-			TRIAE_CS42_3DL_TGACv1_251796_AA0885030	NAC-h	-	-	-	-	-	-	-	-
-	TRIAE_CS42_U_TGACv1_644928_AA2142300	TRIAE_CS42_4AL_TGACv1_288222_AA0941150	TRIAE_CS42_7DS_TGACv1_621783_AA2026010	NAC-c	HvNAC034	MLOC_65480.1	88.8067	89.47	-	-	-	-
-		TRIAE_CS42_4AL_TGACv1_288367_AA0946570 and TRIAE_CS42_4AL_TGACv1_289038_AA0963850 and TRIAE_CS42_4AL_TGACv1_289844_AA0977690 and TRIAE_CS42_4AL_TGACv1_290141_AA0982120 and TRIAE_CS42_4AL_TGACv1_292332_AA0998470	TRIAE_CS42_7DS_TGACv1_622066_AA2032070	NAC-c	-	-	-	-	-	-	-	-
-		TRIAE_CS42_4AL_TGACv1_288585_AA0953020	TRIAE_CS42_7DS_TGACv1_621407_AA2014500	NAC-c	-	-	-	-	ONAC090	LOC_Os06g01480.1	82.255	82.37
-	TRIAE_CS42_4AL_TGACv1_289600_AA0973790			NAC-h	-	-	-	-	-	-	-	-
-	TRIAE_CS42_4AL_TGACv1_289704_AA0975610	TRIAE_CS42_4BS_TGACv1_327976_AA1080270	TRIAE_CS42_4DS_TGACv1_361834_AA1173430	NAC-d	HvNAC021	MLOC_68284.1	96.85	97.11	ONAC006	LOC_Os03g42630.1	87.4933	87.86
-		TRIAE_CS42_4AL_TGACv1_289844_AA0977700	TRIAE_CS42_7DS_TGACv1_622629_AA2042860	NAC-c	-	MLOC_75524.1	86.59	89.07	-	-	-	-
-	TRIAE_CS42_4AL_TGACv1_289924_AA0978910	TRIAE_CS42_5BL_TGACv1_406841_AA1350390		NAC-h	-	-	-	-	-	-	-	-
-	TRIAE_CS42_4AL_TGACv1_290400_AA0985010	TRIAE_CS42_5BL_TGACv1_408628_AA1363970		NAC-h	-	-	-	-	-	-	-	-
-	TRIAE_CS42_4AL_TGACv1_292230_AA0998160	TRIAE_CS42_4BS_TGACv1_327925_AA1078970	TRIAE_CS42_4DS_TGACv1_361684_AA1171560	NAC-a	HvNAC020	MLOC_61270.3	94.5067	94.64	OsNAC5/ONAC009	LOC_Os11g08210.1	80.0967	80.27
-	TRIAE_CS42_4AL_TGACv1_299406_AA1002890		TRIAE_CS42_5DL_TGACv1_434635_AA1439200 and TRIAE_CS42_5DL_TGACv1_436618_AA1462300	NAC-h	-	-	-	-	-	-	-	-
-	TRIAE_CS42_4AS_TGACv1_306855_AA1014220	TRIAE_CS42_4BL_TGACv1_322713_AA1072770	TRIAE_CS42_4DL_TGACv1_342407_AA1112880	NAC-d	HvNAC013	MLOC_64057.2	92.0667	92.29	ONAC039	LOC_Os03g21030.1	86.79	87.2
-	TRIAE_CS42_4AS_TGACv1_307275_AA1019090	TRIAE_CS42_4BL_TGACv1_320349_AA1036320	TRIAE_CS42_4DL_TGACv1_343385_AA1133860	NAC-g	-	MLOC_50895.3	93.13	93.41	-	-	-	-
-	TRIAE_CS42_4AS_TGACv1_307303_AA1019290	TRIAE_CS42_4BL_TGACv1_320737_AA1047550	TRIAE_CS42_4DL_TGACv1_342726_AA1120400	NAC-a	HvNAC005	MLOC_65101.1	93.5433	94.68	ONAC058	LOC_Os03g21060.1	84.8833	85.18
-		TRIAE_CS42_4BL_TGACv1_320661_AA1045860		NAC-e	-	-	-	-	-	-	-	-
-		TRIAE_CS42_4BL_TGACv1_320661_AA1045870		NAC-e	-	-	-	-	-	-	-	-
-	TRIAE_CS42_5AL_TGACv1_374660_AA1205930	TRIAE_CS42_4BL_TGACv1_321111_AA1055630	TRIAE_CS42_4DL_TGACv1_343654_AA1137690	NAC-b	-	MLOC_74055.1	91.7733	92.13	ONAC054	LOC_Os03g02800.1	82.76	83.03
-	TRIAE_CS42_5AL_TGACv1_374631_AA1204930	TRIAE_CS42_4BL_TGACv1_321714_AA1064450	TRIAE_CS42_4DL_TGACv1_343593_AA1137090	NAC-e	-	-	-	-	-	-	-	-
-	TRIAE_CS42_U_TGACv1_643195_AA2128790	TRIAE_CS42_4BL_TGACv1_322246_AA1069960	TRIAE_CS42_4DL_TGACv1_342906_AA1125140	NAC-e	-	-	-	-	-	-	-	-
-		TRIAE_CS42_4BL_TGACv1_322715_AA1072790		NAC-e	-	-	-	-	-	-	-	-
-		TRIAE_CS42_4BS_TGACv1_328613_AA1091020	TRIAE_CS42_4DS_TGACv1_361975_AA1175050 and TRIAE_CS42_4DS_TGACv1_361838_AA1173490	NAC-h	-	-	-	-	-	-	-	-
-		TRIAE_CS42_4BS_TGACv1_328847_AA1094500	TRIAE_CS42_4DS_TGACv1_361304_AA1165350	NAC-h	-	-	-	-	-	-	-	-
-		TRIAE_CS42_4BS_TGACv1_329104_AA1097830	TRIAE_CS42_4DS_TGACv1_362919_AA1182750	NAC-h	-	-	-	-	-	-	-	-
-	TRIAE_CS42_5AL_TGACv1_374586_AA1203930		TRIAE_CS42_4DL_TGACv1_345017_AA1151060	NAC-c	-	MLOC_56769.1	94.595	95.05	ONAC056	LOC_Os03g03540.1	80.875	81.14
TaNAC2/NAC2a	TRIAE_CS42_5AL_TGACv1_373971_AA1185940	TRIAE_CS42_5BL_TGACv1_407166_AA1354040	TRIAE_CS42_5DL_TGACv1_438120_AA1467920	NAC-a	HvNAC003	MLOC_37104.2	93.41	94.08	SNAC1/ONAC002	LOC_Os03g60080.1	86.62	87.24
TaNAC13	TRIAE_CS42_5AL_TGACv1_374001_AA1187350	TRIAE_CS42_5BL_TGACv1_405569_AA1330600	TRIAE_CS42_5DL_TGACv1_436785_AA1463190	NAC-d	HvNAC037	MLOC_5832.1	93.56	94.27	-	-	-	-
TaNAC69	TRIAE_CS42_5AL_TGACv1_374001_AA1187360	TRIAE_CS42_5BL_TGACv1_405234_AA1322970	TRIAE_CS42_5DL_TGACv1_436785_AA1463200	NAC-a	HvNAC027	MLOC_4747.1	92.72	92.87	ONAC122	LOC_Os11g03300.1	85.4333	85.66
-	TRIAE_CS42_5AL_TGACv1_374706_AA1207030	TRIAE_CS42_5BL_TGACv1_407515_AA1357640	TRIAE_CS42_5DL_TGACv1_434895_AA1443270	NAC-f	HvNAC010	MLOC_55957.2	90.1867	90.38	-	-	-	-
-	TRIAE_CS42_5AL_TGACv1_375009_AA1213810	TRIAE_CS42_5BL_TGACv1_404613_AA1306170		-	-	-	-	-	-	-	-	-
-	TRIAE_CS42_5AL_TGACv1_375225_AA1218100	TRIAE_CS42_5BL_TGACv1_405921_AA1337700	TRIAE_CS42_5DL_TGACv1_435993_AA1457080	NAC-b	-	MLOC_11138.1	90.8333	92.54	ONAC042	LOC_Os09g32040.1	88.17	88.35
-	TRIAE_CS42_5AL_TGACv1_375261_AA1218690	TRIAE_CS42_5BL_TGACv1_407099_AA1353320	TRIAE_CS42_5DL_TGACv1_433377_AA1411480	NAC-b	-	MLOC_37844.1	96.64	97.09	ONAC110	LOC_Os09g38010.1	86.6367	87.13
-		TRIAE_CS42_5BL_TGACv1_407131_AA1353730		NAC-h	-	-	-	-	-	-	-	-
-	TRIAE_CS42_5AL_TGACv1_375261_AA1218710			-	-	-	-	-	-	-	-	-
-	TRIAE_CS42_5AL_TGACv1_375306_AA1219530		TRIAE_CS42_5DL_TGACv1_434594_AA1438480	NAC-e	-	-	-	-	-	-	-	-
-	TRIAE_CS42_5AL_TGACv1_375704_AA1225840	TRIAE_CS42_5BL_TGACv1_404290_AA1294020		NAC-e	-	-	-	-	ONAC066	LOC_Os03g56580.1	83.19	83.62
-	TRIAE_CS42_5AL_TGACv1_375952_AA1229310	TRIAE_CS42_5BL_TGACv1_404290_AA1294030	TRIAE_CS42_5DL_TGACv1_437385_AA1466090	NAC-e	-	MLOC_4952.1	89.1567	90.72	-	-	-	-
-	TRIAE_CS42_5AL_TGACv1_376003_AA1230550		TRIAE_CS42_5DL_TGACv1_436001_AA1457180	NAC-e	-	MLOC_60153.1	95.085	95.61	ONAC134	LOC_Os12g05990.1	82.86	83.3
-	TRIAE_CS42_5AL_TGACv1_376992_AA1243070			NAC-e	-	-	-	-	-	-	-	-
-	TRIAE_CS42_5AL_TGACv1_377105_AA1244130	TRIAE_CS42_5BL_TGACv1_407438_AA1356890	TRIAE_CS42_5DL_TGACv1_437691_AA1467130	NAC-d	-	MLOC_68185.2	90.6767	90.7	-	LOC_Os09g32260.2	82.4033	81.82
-	TRIAE_CS42_5AL_TGACv1_377157_AA1244560			NAC-d	-	-	-	-	-	-	-	-
-	TRIAE_CS42_5AS_TGACv1_392523_AA1259890	TRIAE_CS42_7BS_TGACv1_591949_AA1926380	TRIAE_CS42_7DS_TGACv1_623994_AA2058170	NAC-g	-	-	-	-	-	-	-	-
-	TRIAE_CS42_5AS_TGACv1_392783_AA1264600	TRIAE_CS42_5BS_TGACv1_423508_AA1378340	TRIAE_CS42_5DS_TGACv1_457805_AA1489940	NAC-h	-	-	-	-	ONAC126	LOC_Os11g07700.1	98.33	98.33
-		TRIAE_CS42_5BL_TGACv1_404340_AA1296200		NAC-g	-	-	-	-	-	-	-	-
-		TRIAE_CS42_5BL_TGACv1_406000_AA1338890	TRIAE_CS42_5DL_TGACv1_442033_AA1469530	NAC-e	-	-	-	-	-	-	-	-
-		TRIAE_CS42_5BL_TGACv1_406164_AA1341580		-	-	-	-	-	-	-	-	-
-		TRIAE_CS42_5BL_TGACv1_407099_AA1353330	TRIAE_CS42_5DL_TGACv1_433377_AA1411490	NAC-b	HvNAC011	MLOC_37843.1	94.74	95.31	ONAC109	LOC_Os09g38000.1	84.295	84.35
-		TRIAE_CS42_5BL_TGACv1_407248_AA1354840	TRIAE_CS42_5DL_TGACv1_434938_AA1443870	NAC-e	-	-	-	-	-	-	-	-
TaNAC21/22		TRIAE_CS42_5BS_TGACv1_423369_AA1375270	TRIAE_CS42_5DS_TGACv1_457110_AA1482510	NAC-d	HvNAC001	MLOC_64240.2	94.78	95.44	ONAC060	LOC_Os12g41680.1	84.895	85.79
-			TRIAE_CS42_5DL_TGACv1_435071_AA1445660	NAC-h	-	-	-	-	-	-	-	-
-			TRIAE_CS42_5DL_TGACv1_439296_AA1468920	NAC-h	-	-	-	-	-	-	-	-
-	TRIAE_CS42_6AL_TGACv1_470992_AA1500370	TRIAE_CS42_6BL_TGACv1_500224_AA1601590	TRIAE_CS42_6DL_TGACv1_527641_AA1706720	NAC-g	-	-	-	-	-	-	-	-
-	TRIAE_CS42_6AL_TGACv1_470993_AA1500390	TRIAE_CS42_6BL_TGACv1_501580_AA1619070	TRIAE_CS42_6DL_TGACv1_526724_AA1690540	NAC-e	-	MLOC_58360.1	92.57	92.97	-	-	-	-
-	TRIAE_CS42_6AL_TGACv1_471424_AA1508490	TRIAE_CS42_6BL_TGACv1_500589_AA1606780		NAC-d	-	-	-	-	-	-	-	-
-	TRIAE_CS42_6AL_TGACv1_471763_AA1513980	TRIAE_CS42_6BL_TGACv1_500168_AA1600460	TRIAE_CS42_6DL_TGACv1_527491_AA1704790	NAC-b	HvNAC016	MLOC_20905.2	90.6167	91.3	ONAC070	LOC_Os02g57650.1	86.7567	87.13
-	TRIAE_CS42_6AL_TGACv1_472224_AA1519450	TRIAE_CS42_6BL_TGACv1_502078_AA1622880	TRIAE_CS42_6DL_TGACv1_528829_AA1716410	NAC-h	-	-	-	-	-	-	-	-
-	TRIAE_CS42_6AL_TGACv1_472990_AA1527910	TRIAE_CS42_6BL_TGACv1_500431_AA1604420	TRIAE_CS42_6DL_TGACv1_526634_AA1688740	NAC-c	-	MLOC_56103.1	92.81	93.52	ONAC052	LOC_Os02g42970.1	86.0733	86.52
-	TRIAE_CS42_6AL_TGACv1_473242_AA1529580		TRIAE_CS42_6DL_TGACv1_527219_AA1700720	-	-	-	-	-	-	-	-	-
-	TRIAE_CS42_6AS_TGACv1_485289_AA1542450	TRIAE_CS42_6BS_TGACv1_513257_AA1636370		NAC-b	-	-	-	-	-	-	-	-
-	TRIAE_CS42_6AS_TGACv1_485568_AA1547750			NAC-h	-	-	-	-	-	-	-	-
-	TRIAE_CS42_6AS_TGACv1_485838_AA1552970 and TRIAE_CS42_6AS_TGACv1_487560_AA1571520	TRIAE_CS42_6BS_TGACv1_513898_AA1651650	TRIAE_CS42_U_TGACv1_643385_AA2131460	NAC-h	-	-	-	-	-	-	-	-
-	TRIAE_CS42_6AS_TGACv1_486339_AA1559950			NAC-h	-	-	-	-	-	-	-	-
TaNAM1	TRIAE_CS42_6AS_TGACv1_486738_AA1564640		TRIAE_CS42_6DS_TGACv1_542626_AA1725630	NAC-a	-	-	-	-	-	-	-	-
TaNAC47/TaNAC67/TaGRAB1	TRIAE_CS42_6AS_TGACv1_487653_AA1572080	TRIAE_CS42_6BS_TGACv1_514379_AA1659010	TRIAE_CS42_U_TGACv1_642999_AA2125900	NAC-a	-	-	-	-	OsNAC3/ONAC067	LOC_Os07g12340.1	81.0467	81.75
-		TRIAE_CS42_6BL_TGACv1_499850_AA1593230	TRIAE_CS42_U_TGACv1_641246_AA2089580	-	-	-	-	-	-	-	-	-
-	TRIAE_CS42_U_TGACv1_641159_AA2086960 and TRIAE_CS42_U_TGACv1_641159_AA2086980	TRIAE_CS42_6BL_TGACv1_501225_AA1615050	TRIAE_CS42_6DL_TGACv1_527970_AA1710360	NAC-d	HvNAC025	MLOC_5165.1	92.82	92.6	ONAC032	LOC_Os02g56600.1	84.0867	85.16
-		TRIAE_CS42_6BL_TGACv1_501598_AA1619180		NAC-d	-	-	-	-	-	-	-	-
-		TRIAE_CS42_6BL_TGACv1_500895_AA1611410 and TRIAE_CS42_6BL_TGACv1_500895_AA1611420	TRIAE_CS42_6DL_TGACv1_527790_AA1708620	NAC-h	-	MLOC_79696.1	88.26	88.59	-	-	-	-
-	TRIAE_CS42_7AL_TGACv1_556071_AA1754590	TRIAE_CS42_7BL_TGACv1_580920_AA1915940	TRIAE_CS42_7DL_TGACv1_604654_AA2000360	NAC-c	-	MLOC_17128.1	93.6	93.87	OsNAC7/ONAC093	LOC_Os06g33940.1	81.34	81.65
-	TRIAE_CS42_7AL_TGACv1_556150_AA1757040	TRIAE_CS42_7BL_TGACv1_577097_AA1865870	TRIAE_CS42_7DL_TGACv1_603025_AA1974000	NAC-d	-	MLOC_65286.1	95.79	96	ONAC092	LOC_Os06g23650.1	80.4767	80.9
-	TRIAE_CS42_7AL_TGACv1_556170_AA1757400	TRIAE_CS42_7BL_TGACv1_581398_AA1917230	TRIAE_CS42_7DL_TGACv1_604385_AA1997610	NAC-c	HvNAC038	MLOC_19933.1	95.8233	96.07	-	-	-	-
-	TRIAE_CS42_7AL_TGACv1_556203_AA1758120		TRIAE_CS42_7DL_TGACv1_602807_AA1969110	NAC-d	-	-	-	-	-	-	-	-
-	TRIAE_CS42_7AL_TGACv1_556203_AA1758130	TRIAE_CS42_7BL_TGACv1_578094_AA1889360	TRIAE_CS42_7DL_TGACv1_602807_AA1969140	NAC-d	HvNAC018	MLOC_56943.2	89.36	89.5	-	-	-	-
TaNAC1/TaNAC-S	TRIAE_CS42_7AL_TGACv1_556250_AA1759120	TRIAE_CS42_7BL_TGACv1_577855_AA1884660	TRIAE_CS42_7DL_TGACv1_604393_AA1997730	NAC-d	-	-	-	-	-	-	-	-
TaNAC7	TRIAE_CS42_7AL_TGACv1_556426_AA1762740	TRIAE_CS42_7BL_TGACv1_579312_AA1906270	TRIAE_CS42_7DL_TGACv1_604258_AA1995950	NAC-d	-	-	-	-	-	-	-	-
-	TRIAE_CS42_7AL_TGACv1_556505_AA1764420	TRIAE_CS42_7BL_TGACv1_580562_AA1914580	TRIAE_CS42_7DL_TGACv1_603425_AA1983440	NAC-e	HvNAC031	MLOC_37364.1	95.5933	96.17	ONAC049	LOC_Os08g02160.1	87.5867	88.64
-	TRIAE_CS42_7AL_TGACv1_556597_AA1766590	TRIAE_CS42_7BL_TGACv1_577598_AA1879210		NAC-e	-	MLOC_15184.1	89.405	90.07	ONAC095	LOC_Os06g51070.1	79.785	77.08
-	TRIAE_CS42_7AL_TGACv1_556820_AA1771630	TRIAE_CS42_7BL_TGACv1_578088_AA1889220	TRIAE_CS42_7DL_TGACv1_604389_AA1997650	NAC-b	HvNAC007	MLOC_50406.5	92.87	94.33	-	-	-	-
-	TRIAE_CS42_7AL_TGACv1_556883_AA1772760	TRIAE_CS42_7BL_TGACv1_580306_AA1913290	TRIAE_CS42_7DL_TGACv1_604890_AA2002740	NAC-g	-	-	-	-	-	-	-	-
-	TRIAE_CS42_7AL_TGACv1_557641_AA1784420	TRIAE_CS42_7BL_TGACv1_577072_AA1865240	TRIAE_CS42_7DL_TGACv1_603884_AA1990680	NAC-g	-	MLOC_72553.1	93.7567	94.41	ONAC094	LOC_Os06g36480.1	84.0467	84.21
-	TRIAE_CS42_7AL_TGACv1_557911_AA1787600		TRIAE_CS42_7DL_TGACv1_602602_AA1962270	NAC-g	-	-	-	-	-	-	-	-
-	TRIAE_CS42_7AL_TGACv1_558463_AA1793550		TRIAE_CS42_7DL_TGACv1_603576_AA1985860	NAC-c	HvNAC033	MLOC_66924.2	93.21	95.1	ONAC029	LOC_Os08g02300.1	84.09	80.09
-	TRIAE_CS42_7AL_TGACv1_558854_AA1796490	TRIAE_CS42_7BL_TGACv1_579057_AA1903540	TRIAE_CS42_7DL_TGACv1_603301_AA1980400	NAC-d	-	MLOC_53744.1	93.9767	94.48	ONAC011	LOC_Os06g46270.1	82.4967	82.92
-	TRIAE_CS42_7AS_TGACv1_569085_AA1806880	TRIAE_CS42_7BS_TGACv1_592455_AA1938420	TRIAE_CS42_7DS_TGACv1_623845_AA2056760	NAC-f	HvNAC041	MLOC_67296.1	93.1233	93.14	-	-	-	-
-	TRIAE_CS42_7AS_TGACv1_569206_AA1810310	TRIAE_CS42_4AL_TGACv1_290399_AA0984980	TRIAE_CS42_7DS_TGACv1_624344_AA2060640	NAC-b	-	MLOC_75297.2	93.7333	94.02	ONAC019	LOC_Os06g01230.2	81.0267	81.28
-	TRIAE_CS42_7AS_TGACv1_569292_AA1812550			NAC-c	-	-	-	-	-	-	-	-
-	TRIAE_CS42_7AS_TGACv1_569459_AA1816500	TRIAE_CS42_7BS_TGACv1_592031_AA1928790	TRIAE_CS42_7DS_TGACv1_624617_AA2062220	NAC-d	-	MLOC_13932.1	95.4533	95.71	ONAC107	LOC_Os08g40030.1	87.1767	85.96
-	TRIAE_CS42_7AS_TGACv1_570362_AA1834420	TRIAE_CS42_7BS_TGACv1_594101_AA1956120	TRIAE_CS42_7DS_TGACv1_625391_AA2065010	NAC-g	-	MLOC_3088.1	94	94.53	-	-	-	-
-	TRIAE_CS42_7AS_TGACv1_570609_AA1838180	TRIAE_CS42_7BS_TGACv1_592641_AA1942120	TRIAE_CS42_7DS_TGACv1_623437_AA2053190	NAC-d	HvNAC017	MLOC_5374.1	85.38	85.44	-	-	-	-
-	TRIAE_CS42_7AS_TGACv1_570805_AA1841120	TRIAE_CS42_4AL_TGACv1_288367_AA0946600	TRIAE_CS42_7DS_TGACv1_624826_AA2063410 and TRIAE_CS42_7DS_TGACv1_622568_AA2041990	NAC-c	-	-	-	-	-	-	-	-
-	TRIAE_CS42_7AS_TGACv1_571374_AA1847200	TRIAE_CS42_7BS_TGACv1_591807_AA1921930	TRIAE_CS42_7DS_TGACv1_623144_AA2049980	NAC-d	HvNAC024	MLOC_58272.1	90.8433	90.13	-	-	-	-
-	TRIAE_CS42_7AS_TGACv1_571653_AA1849170	TRIAE_CS42_7BS_TGACv1_592607_AA1941290	TRIAE_CS42_7DS_TGACv1_622039_AA2031450	NAC-h	-	-	-	-	-	-	-	-
-		TRIAE_CS42_7BL_TGACv1_577055_AA1864360		-	-	-	-	-	-	-	-	-
-		TRIAE_CS42_7BL_TGACv1_577321_AA1872160		NAC-h	-	-	-	-	-	-	-	-
-		TRIAE_CS42_7BL_TGACv1_582013_AA1918050		NAC-h	-	-	-	-	-	-	-	-
-		TRIAE_CS42_7BS_TGACv1_592078_AA1930100	TRIAE_CS42_7DS_TGACv1_623420_AA2052990	NAC-h	-	-	-	-	-	-	-	-
-		TRIAE_CS42_7BS_TGACv1_592500_AA1939320	TRIAE_CS42_7DS_TGACv1_623635_AA2054950	NAC-h	-	-	-	-	-	-	-	-
-		TRIAE_CS42_7BS_TGACv1_592607_AA1941280	TRIAE_CS42_7DS_TGACv1_622130_AA2033420	NAC-h	-	MLOC_59591.4	88.62	88.97	-	-	-	-
-	TRIAE_CS42_U_TGACv1_641082_AA2084530	TRIAE_CS42_7BS_TGACv1_593125_AA1948430	TRIAE_CS42_7DS_TGACv1_623146_AA2050060	NAC-d	-	-	-	-	-	-	-	-
-			TRIAE_CS42_7DL_TGACv1_604493_AA1998630	-	-	-	-	-	-	-	-	-
-			TRIAE_CS42_7DS_TGACv1_621451_AA2016030	NAC-h	-	-	-	-	-	-	-	-
-			TRIAE_CS42_7DS_TGACv1_621882_AA2028520	NAC-h	-	-	-	-	-	-	-	-
NTL5			TRIAE_CS42_7DS_TGACv1_624889_AA2063750	NAC-b	-	-	-	-	-	-	-	-
-	TRIAE_CS42_U_TGACv1_641464_AA2095820			NAC-h	-	-	-	-	-	-	-	-
