# Supplementary material for: Genome-Wide Sequence and Expression Analysis of the NAC Transcription Factor Family in Polyploid Wheat
Source: G3 (Bethesda). 2017 Jul 11;7(9):3019–29. doi: 10.1534/g3.117.043679 (PMC5592928; doi:10.1534/g3.117.043679)
Supplement: Supplementary file 8 [file 3019TableS5.xlsx]

## Sheet: Sheet1
Table S5. CTD motifs per gene for wheat, barley and rice.
		Motif
Gene	Grouping	i	ii	iii	iv	v	vi	vii	viii	ix	x	xi	xii	xiii
LOC_Os01g59640.1	-	No	No	No	No	No	No	No	No	No	No	No	No	Yes
LOC_Os01g01430.1	NAC-a	No	No	No	No	No	No	No	No	No	No	Yes	No	No
LOC_Os01g66120.1	NAC-a	No	No	No	No	Yes	No	No	No	No	No	No	No	No
LOC_Os03g60080.1	NAC-a	No	No	No	No	No	Yes	No	No	No	No	No	No	No
LOC_Os05g34830.1	NAC-a	No	No	No	No	Yes	No	No	No	No	No	No	No	No
LOC_Os07g12340.1	NAC-a	No	No	No	No	No	Yes	No	No	No	No	No	No	No
MLOC_37104.2	NAC-a	No	No	No	No	No	Yes	No	No	No	No	No	No	No
MLOC_59162.1	NAC-a	No	No	No	No	Yes	No	No	No	No	No	No	No	No
MLOC_63743.1	NAC-a	No	No	No	No	Yes	No	No	No	No	No	No	No	No
TRIAE_CS42_1AL_TGACv1_002139_AA0039010.1	NAC-a	No	No	No	No	Yes	No	No	No	No	No	No	No	No
TRIAE_CS42_1BL_TGACv1_032010_AA0124150.1	NAC-a	No	No	No	No	Yes	No	No	No	No	No	No	No	No
TRIAE_CS42_1DL_TGACv1_061442_AA0195380.1	NAC-a	No	No	No	No	Yes	No	No	No	No	No	No	No	No
TRIAE_CS42_2AS_TGACv1_113243_AA0353410.1	NAC-a	No	Yes	No	No	No	No	No	No	No	No	No	No	No
TRIAE_CS42_2BS_TGACv1_145996_AA0452240.1	NAC-a	No	Yes	No	No	No	No	No	No	No	No	No	No	No
TRIAE_CS42_2BS_TGACv1_146243_AA0460100.1	NAC-a	No	No	No	No	No	No	No	No	No	No	No	No	Yes
TRIAE_CS42_2DS_TGACv1_177687_AA0582480.1	NAC-a	No	No	No	No	No	No	No	No	No	No	No	No	Yes
TRIAE_CS42_2DS_TGACv1_179582_AA0608070.3	NAC-a	No	Yes	No	No	No	No	No	No	No	No	No	No	No
TRIAE_CS42_3AL_TGACv1_194123_AA0626970.1	NAC-a	No	No	No	No	Yes	No	No	No	No	No	No	No	No
TRIAE_CS42_3B_TGACv1_221115_AA0730720.1	NAC-a	No	No	No	No	Yes	No	No	No	No	No	No	No	No
TRIAE_CS42_3DL_TGACv1_249320_AA0845360.1	NAC-a	No	No	No	No	Yes	No	No	No	No	No	No	No	No
TRIAE_CS42_5AL_TGACv1_373971_AA1185940.1	NAC-a	No	No	No	No	No	Yes	No	No	No	No	No	No	No
TRIAE_CS42_5BL_TGACv1_407166_AA1354040.4	NAC-a	No	No	No	No	No	Yes	No	No	No	No	No	No	No
TRIAE_CS42_5DL_TGACv1_438120_AA1467920.2	NAC-a	No	No	No	No	No	Yes	No	No	No	No	No	No	No
TRIAE_CS42_6AS_TGACv1_487653_AA1572080.1	NAC-a	No	No	No	No	No	Yes	No	No	No	No	No	No	No
TRIAE_CS42_6BS_TGACv1_514379_AA1659010.1	NAC-a	No	No	No	No	No	Yes	No	No	No	No	No	No	No
TRIAE_CS42_6DS_TGACv1_542626_AA1725630.1	NAC-a	No	Yes	No	No	No	No	No	No	No	No	No	No	No
TRIAE_CS42_U_TGACv1_642999_AA2125900.1	NAC-a	No	No	No	No	No	Yes	No	No	No	No	No	No	No
LOC_Os02g57650.1	NAC-b	No	No	No	No	No	No	No	No	No	No	No	No	Yes
LOC_Os08g06140.1	NAC-b	No	No	No	No	No	No	No	Yes	No	No	No	No	No
LOC_Os09g32040.1	NAC-b	No	No	No	No	No	No	Yes	No	No	No	No	No	No
LOC_Os10g42130.1	NAC-b	No	No	No	No	No	No	No	No	No	No	Yes	No	Yes
MLOC_50406.5	NAC-b	No	No	No	No	No	No	No	Yes	No	No	No	No	No
MLOC_58950.3	NAC-b	No	No	No	No	No	No	No	No	No	No	No	No	Yes
TRIAE_CS42_1AL_TGACv1_000555_AA0014640.1	NAC-b	No	No	No	No	No	No	No	No	No	No	No	No	Yes
TRIAE_CS42_1BL_TGACv1_033928_AA0142640.1	NAC-b	No	No	No	No	No	No	No	No	No	No	No	No	Yes
TRIAE_CS42_1DL_TGACv1_063379_AA0226840.1	NAC-b	No	No	No	No	No	No	No	No	No	No	No	No	Yes
TRIAE_CS42_2AL_TGACv1_093618_AA0283710.1	NAC-b	No	No	No	No	No	No	No	No	No	No	No	No	Yes
TRIAE_CS42_2BL_TGACv1_129841_AA0397780.1	NAC-b	No	No	No	No	No	No	No	No	No	No	No	No	Yes
TRIAE_CS42_4AL_TGACv1_290399_AA0984980.3	NAC-b	No	No	No	No	No	No	No	Yes	No	No	No	No	No
TRIAE_CS42_5AL_TGACv1_375225_AA1218100.1	NAC-b	No	No	No	No	No	No	Yes	No	No	No	No	No	No
TRIAE_CS42_5BL_TGACv1_405921_AA1337700.1	NAC-b	No	No	No	No	No	No	Yes	No	No	No	No	No	Yes
TRIAE_CS42_5DL_TGACv1_435993_AA1457080.1	NAC-b	No	No	No	No	No	No	Yes	No	No	No	No	No	No
TRIAE_CS42_7AL_TGACv1_556820_AA1771630.6	NAC-b	No	No	No	No	No	No	No	Yes	Yes	No	No	No	Yes
TRIAE_CS42_7AS_TGACv1_569206_AA1810310.1	NAC-b	No	No	No	No	No	No	No	Yes	No	No	No	No	No
TRIAE_CS42_7BL_TGACv1_578088_AA1889220.3	NAC-b	No	No	No	No	No	No	No	Yes	No	No	No	No	Yes
TRIAE_CS42_7DL_TGACv1_604389_AA1997650.3	NAC-b	No	No	No	No	No	No	No	Yes	No	No	No	No	No
TRIAE_CS42_7DS_TGACv1_624344_AA2060640.1	NAC-b	No	No	No	No	No	No	No	Yes	No	No	No	No	No
LOC_Os02g15340.1	NAC-c	No	No	Yes	No	No	No	No	No	No	No	No	No	No
LOC_Os02g42970.1	NAC-c	No	No	Yes	No	No	No	No	No	No	No	No	No	No
LOC_Os03g03540.1	NAC-c	No	No	Yes	No	No	No	No	No	No	No	No	No	No
LOC_Os06g33940.1	NAC-c	No	No	Yes	No	No	No	No	No	No	No	No	No	No
LOC_Os08g01330.1	NAC-c	No	No	No	No	No	No	No	No	No	No	No	No	Yes
LOC_Os08g02300.1	NAC-c	No	No	Yes	No	No	No	No	No	No	No	No	No	No
LOC_Os10g38834.1	NAC-c	No	No	Yes	No	No	No	No	No	No	No	No	No	No
MLOC_17128.1	NAC-c	No	No	Yes	No	No	No	No	No	No	No	No	No	No
MLOC_53086.2	NAC-c	No	No	No	No	No	No	No	No	No	No	No	No	Yes
MLOC_56103.1	NAC-c	No	No	Yes	No	No	No	No	No	No	No	No	No	No
MLOC_56769.1	NAC-c	No	No	Yes	No	No	No	No	No	No	No	No	No	No
MLOC_65480.1	NAC-c	No	No	No	No	No	No	No	No	No	No	No	No	Yes
MLOC_66924.2	NAC-c	No	No	Yes	No	No	No	No	No	No	No	No	No	No
MLOC_75524.1	NAC-c	No	No	No	No	No	No	No	No	No	No	No	No	Yes
TRIAE_CS42_2AL_TGACv1_093527_AA0281830.1	NAC-c	No	No	Yes	No	No	No	No	No	No	No	No	No	No
TRIAE_CS42_4AL_TGACv1_288222_AA0941150.1	NAC-c	No	No	No	No	No	No	No	No	No	No	No	No	Yes
TRIAE_CS42_4AL_TGACv1_288585_AA0953020.1	NAC-c	No	No	No	No	No	No	No	No	No	No	No	No	Yes
TRIAE_CS42_4AL_TGACv1_289038_AA0963850.1	NAC-c	No	No	No	No	No	No	No	No	No	No	No	No	Yes
TRIAE_CS42_4AL_TGACv1_289844_AA0977690.1	NAC-c	No	No	No	No	No	No	No	No	No	No	No	No	Yes
TRIAE_CS42_4AL_TGACv1_290141_AA0982120.1	NAC-c	No	No	No	No	No	No	No	No	No	No	No	No	Yes
TRIAE_CS42_4DL_TGACv1_345017_AA1151060.1	NAC-c	No	No	Yes	No	No	No	No	No	No	No	No	No	No
TRIAE_CS42_5AL_TGACv1_374586_AA1203930.1	NAC-c	No	No	Yes	No	No	No	No	No	No	No	No	No	No
TRIAE_CS42_6AL_TGACv1_472990_AA1527910.1	NAC-c	No	No	Yes	No	No	No	No	No	No	No	No	No	No
TRIAE_CS42_6BL_TGACv1_500431_AA1604420.1	NAC-c	No	No	Yes	No	No	No	No	No	No	No	No	No	No
TRIAE_CS42_6DL_TGACv1_526634_AA1688740.1	NAC-c	No	No	Yes	No	No	No	No	No	No	No	No	No	No
TRIAE_CS42_7AL_TGACv1_556071_AA1754590.1	NAC-c	No	No	Yes	No	No	No	No	No	No	No	No	No	No
TRIAE_CS42_7AL_TGACv1_558463_AA1793550.1	NAC-c	No	No	Yes	No	No	No	No	No	No	No	No	No	No
TRIAE_CS42_7AS_TGACv1_569292_AA1812550.1	NAC-c	No	No	No	No	No	No	No	No	No	No	No	No	Yes
TRIAE_CS42_7AS_TGACv1_570805_AA1841120.1	NAC-c	No	No	No	No	No	No	No	No	No	No	No	No	Yes
TRIAE_CS42_7BL_TGACv1_580920_AA1915940.1	NAC-c	No	No	Yes	No	No	No	No	No	No	No	No	No	No
TRIAE_CS42_7DL_TGACv1_603576_AA1985860.3	NAC-c	No	No	Yes	No	No	No	No	No	No	No	No	No	No
TRIAE_CS42_7DL_TGACv1_604654_AA2000360.2	NAC-c	No	No	Yes	No	No	No	No	No	No	No	No	No	No
TRIAE_CS42_7DS_TGACv1_621407_AA2014500.1	NAC-c	No	No	No	No	No	No	No	No	No	No	No	No	Yes
TRIAE_CS42_7DS_TGACv1_621783_AA2026010.1	NAC-c	No	No	No	No	No	No	No	No	No	No	No	No	Yes
TRIAE_CS42_7DS_TGACv1_622066_AA2032070.1	NAC-c	No	No	No	No	No	No	No	No	No	No	No	No	Yes
TRIAE_CS42_7DS_TGACv1_622568_AA2041990.1	NAC-c	No	No	No	No	No	No	No	No	No	No	No	No	Yes
TRIAE_CS42_7DS_TGACv1_624826_AA2063410.1	NAC-c	No	No	No	No	No	No	No	No	No	No	No	No	Yes
TRIAE_CS42_U_TGACv1_644928_AA2142300.1	NAC-c	No	No	No	No	No	No	No	No	No	No	No	No	Yes
LOC_Os02g06950.1	NAC-d	No	No	No	No	No	No	No	No	No	No	Yes	No	No
LOC_Os02g36880.1	NAC-d	No	No	No	No	No	No	No	No	Yes	No	No	No	No
LOC_Os03g21030.1	NAC-d	No	No	No	No	No	No	No	No	No	No	Yes	No	No
LOC_Os04g38720.1	NAC-d	No	No	No	No	No	No	No	No	Yes	No	No	No	No
LOC_Os06g23650.1	NAC-d	No	No	No	No	No	No	No	No	No	Yes	No	No	No
LOC_Os06g46270.1	NAC-d	No	No	No	No	No	No	No	No	Yes	No	No	No	No
LOC_Os07g48550.1	NAC-d	No	No	No	No	No	No	No	No	No	No	Yes	No	No
LOC_Os08g10080.1	NAC-d	No	No	No	No	No	No	No	No	Yes	No	No	No	No
LOC_Os08g40030.1	NAC-d	No	No	No	No	No	No	No	No	No	No	No	No	Yes
LOC_Os12g41680.1	NAC-d	No	No	No	No	No	No	No	No	Yes	No	No	No	No
MLOC_5165.1	NAC-d	No	No	No	No	No	No	No	No	No	No	No	No	Yes
MLOC_53744.1	NAC-d	No	No	No	No	No	No	No	No	Yes	No	No	No	Yes
MLOC_56943.2	NAC-d	No	No	No	No	No	No	No	No	No	No	Yes	No	No
MLOC_57427.1	NAC-d	No	No	No	No	No	No	No	No	No	No	Yes	No	Yes
MLOC_63121.1	NAC-d	No	No	No	No	No	No	No	No	No	No	Yes	No	No
MLOC_64057.2	NAC-d	No	No	No	No	No	No	No	No	No	No	Yes	No	No
MLOC_64240.2	NAC-d	No	No	No	No	No	No	No	No	Yes	No	No	No	No
MLOC_65286.1	NAC-d	No	No	No	No	No	No	No	No	No	Yes	No	No	No
MLOC_65400.1	NAC-d	No	No	No	No	No	No	No	No	No	No	Yes	No	No
MLOC_65714.1	NAC-d	No	No	No	No	No	No	No	No	No	No	Yes	No	No
TRIAE_CS42_2AL_TGACv1_093319_AA0277330.1	NAC-d	No	No	No	No	No	No	No	No	Yes	No	No	No	No
TRIAE_CS42_2AS_TGACv1_113123_AA0351630.1	NAC-d	No	No	No	No	No	No	No	No	No	No	Yes	No	No
TRIAE_CS42_2AS_TGACv1_113796_AA0360690.1	NAC-d	No	No	No	No	No	No	No	No	No	No	Yes	No	No
TRIAE_CS42_2AS_TGACv1_113960_AA0362760.1	NAC-d	No	No	No	No	No	No	No	No	No	No	Yes	No	Yes
TRIAE_CS42_2BL_TGACv1_133608_AA0442820.1	NAC-d	No	No	No	No	No	No	No	No	Yes	No	No	No	No
TRIAE_CS42_2BS_TGACv1_146451_AA0465500.1	NAC-d	No	No	No	No	No	No	No	No	No	No	Yes	No	No
TRIAE_CS42_2BS_TGACv1_146614_AA0469500.1	NAC-d	No	No	No	No	No	No	No	No	No	No	Yes	No	No
TRIAE_CS42_2BS_TGACv1_147330_AA0481860.1	NAC-d	No	No	No	No	No	No	No	No	No	No	Yes	No	No
TRIAE_CS42_2BS_TGACv1_148552_AA0493700.1	NAC-d	No	No	No	No	No	No	No	No	No	No	Yes	No	No
TRIAE_CS42_2DL_TGACv1_158215_AA0512750.1	NAC-d	No	No	No	No	No	No	No	No	No	Yes	No	No	No
TRIAE_CS42_2DS_TGACv1_177136_AA0566130.2	NAC-d	No	No	No	No	No	No	No	No	No	No	Yes	No	No
TRIAE_CS42_2DS_TGACv1_177206_AA0568970.1	NAC-d	No	No	No	No	No	No	No	No	No	No	Yes	No	No
TRIAE_CS42_2DS_TGACv1_177294_AA0572540.1	NAC-d	No	No	No	No	No	No	No	No	No	No	Yes	No	No
TRIAE_CS42_3DS_TGACv1_273115_AA0928510.1	NAC-d	No	No	No	No	No	No	No	No	No	No	Yes	No	No
TRIAE_CS42_4AS_TGACv1_306855_AA1014220.1	NAC-d	No	No	No	No	No	No	No	No	No	No	Yes	No	No
TRIAE_CS42_4BL_TGACv1_322713_AA1072770.1	NAC-d	No	No	No	No	No	No	No	No	No	No	Yes	No	No
TRIAE_CS42_4DL_TGACv1_342407_AA1112880.1	NAC-d	No	No	No	No	No	No	No	No	No	No	Yes	No	No
TRIAE_CS42_5BS_TGACv1_423369_AA1375270.2	NAC-d	No	No	No	No	No	No	No	No	Yes	No	No	No	No
TRIAE_CS42_5DS_TGACv1_457110_AA1482510.2	NAC-d	No	No	No	No	No	No	No	No	Yes	No	No	No	No
TRIAE_CS42_6AL_TGACv1_471424_AA1508490.1	NAC-d	No	No	No	No	No	No	No	No	No	No	No	No	Yes
TRIAE_CS42_6BL_TGACv1_500589_AA1606780.1	NAC-d	No	No	No	No	No	No	No	No	No	No	No	No	Yes
TRIAE_CS42_6BL_TGACv1_501225_AA1615050.1	NAC-d	No	No	No	No	No	No	No	No	No	No	No	No	Yes
TRIAE_CS42_6DL_TGACv1_527970_AA1710360.1	NAC-d	No	No	No	No	No	No	No	No	No	No	No	No	Yes
TRIAE_CS42_7AL_TGACv1_556150_AA1757040.1	NAC-d	No	No	No	No	No	No	No	No	No	Yes	No	No	No
TRIAE_CS42_7AL_TGACv1_556203_AA1758120.1	NAC-d	No	No	No	No	No	No	No	No	No	No	Yes	No	Yes
TRIAE_CS42_7AL_TGACv1_556203_AA1758130.1	NAC-d	No	No	No	No	No	No	No	No	No	No	Yes	No	No
TRIAE_CS42_7AL_TGACv1_556250_AA1759120.2	NAC-d	No	No	No	No	No	No	No	No	Yes	No	No	No	No
TRIAE_CS42_7AL_TGACv1_556426_AA1762740.1	NAC-d	No	No	No	No	No	No	No	No	Yes	No	No	No	Yes
TRIAE_CS42_7AL_TGACv1_558854_AA1796490.1	NAC-d	No	No	No	No	No	No	No	No	Yes	No	No	No	No
TRIAE_CS42_7AS_TGACv1_570609_AA1838180.1	NAC-d	No	No	No	No	No	No	No	No	No	No	Yes	No	No
TRIAE_CS42_7BL_TGACv1_577097_AA1865870.1	NAC-d	No	No	No	No	No	No	No	No	No	Yes	No	No	No
TRIAE_CS42_7BL_TGACv1_577855_AA1884660.1	NAC-d	No	No	No	No	No	No	No	No	Yes	No	No	No	No
TRIAE_CS42_7BL_TGACv1_578094_AA1889360.1	NAC-d	No	No	No	No	No	No	No	No	No	No	Yes	No	No
TRIAE_CS42_7BL_TGACv1_579057_AA1903540.1	NAC-d	No	No	No	No	No	No	No	No	Yes	No	No	No	Yes
TRIAE_CS42_7BL_TGACv1_579312_AA1906270.1	NAC-d	No	No	No	No	No	No	No	No	Yes	No	No	No	Yes
TRIAE_CS42_7BS_TGACv1_592641_AA1942120.1	NAC-d	No	No	No	No	No	No	No	No	No	No	Yes	No	No
TRIAE_CS42_7BS_TGACv1_593125_AA1948430.1	NAC-d	No	No	No	No	No	No	No	No	No	No	Yes	No	No
TRIAE_CS42_7DL_TGACv1_602807_AA1969110.2	NAC-d	No	No	No	No	No	No	No	No	No	No	Yes	No	Yes
TRIAE_CS42_7DL_TGACv1_602807_AA1969140.1	NAC-d	No	No	No	No	No	No	No	No	No	No	Yes	No	No
TRIAE_CS42_7DL_TGACv1_603025_AA1974000.1	NAC-d	No	No	No	No	No	No	No	No	No	Yes	No	No	No
TRIAE_CS42_7DL_TGACv1_603301_AA1980400.1	NAC-d	No	No	No	No	No	No	No	No	Yes	No	No	No	No
TRIAE_CS42_7DL_TGACv1_604258_AA1995950.1	NAC-d	No	No	No	No	No	No	No	No	Yes	No	No	No	Yes
TRIAE_CS42_7DL_TGACv1_604393_AA1997730.1	NAC-d	No	No	No	No	No	No	No	No	No	Yes	No	No	No
TRIAE_CS42_7DS_TGACv1_623146_AA2050060.1	NAC-d	No	No	No	No	No	No	No	No	No	No	Yes	No	No
TRIAE_CS42_7DS_TGACv1_623437_AA2053190.1	NAC-d	No	No	No	No	No	No	No	No	No	No	Yes	No	No
TRIAE_CS42_U_TGACv1_641082_AA2084530.1	NAC-d	No	No	No	No	No	No	No	No	No	No	Yes	No	No
LOC_Os05g34600.1	NAC-e	No	No	No	No	No	No	No	No	No	No	No	No	Yes
TRIAE_CS42_4BL_TGACv1_320661_AA1045870.1	NAC-e	No	No	No	No	No	No	No	No	No	No	No	No	Yes
TRIAE_CS42_4BL_TGACv1_321714_AA1064450.1	NAC-e	No	No	No	No	No	No	No	No	No	No	No	No	Yes
TRIAE_CS42_4BL_TGACv1_322246_AA1069960.1	NAC-e	No	No	No	No	No	No	No	No	No	No	No	No	Yes
TRIAE_CS42_4BL_TGACv1_322715_AA1072790.1	NAC-e	No	No	No	No	No	No	No	No	No	No	No	No	Yes
TRIAE_CS42_4DL_TGACv1_342906_AA1125140.1	NAC-e	No	No	No	No	No	No	No	No	No	No	No	No	Yes
TRIAE_CS42_4DL_TGACv1_343593_AA1137090.1	NAC-e	No	No	No	No	No	No	No	No	No	No	No	No	Yes
TRIAE_CS42_5AL_TGACv1_374631_AA1204930.1	NAC-e	No	No	No	No	No	No	No	No	No	No	No	No	Yes
TRIAE_CS42_5BL_TGACv1_406000_AA1338890.1	NAC-e	No	No	No	No	No	No	No	No	No	No	No	No	Yes
TRIAE_CS42_5DL_TGACv1_442033_AA1469530.1	NAC-e	No	No	No	No	No	No	No	No	No	No	No	No	Yes
TRIAE_CS42_6AL_TGACv1_470993_AA1500390.1	NAC-e	No	No	No	No	No	No	No	No	No	No	No	No	Yes
TRIAE_CS42_6BL_TGACv1_501580_AA1619070.1	NAC-e	No	No	No	No	No	No	No	No	No	No	No	No	Yes
TRIAE_CS42_6DL_TGACv1_526724_AA1690540.1	NAC-e	No	No	No	No	No	No	No	No	No	No	No	No	Yes
TRIAE_CS42_U_TGACv1_643195_AA2128790.1	NAC-e	No	No	No	No	No	No	No	No	No	No	No	No	Yes
LOC_Os01g70110.1	NAC-f	No	No	No	No	No	No	No	No	No	No	No	No	Yes
LOC_Os08g42400.1	NAC-f	No	No	No	No	No	No	No	No	No	No	No	No	Yes
LOC_Os09g33490.1	NAC-f	No	No	No	No	No	No	No	No	No	No	No	No	Yes
LOC_Os11g31330.1	NAC-f	No	No	No	No	No	No	No	No	No	No	No	No	Yes
LOC_Os12g29330.1	NAC-f	No	No	No	No	No	No	No	No	No	No	No	No	Yes
MLOC_55957.2	NAC-f	No	No	No	No	No	No	No	No	No	No	No	No	Yes
MLOC_67296.1	NAC-f	No	No	No	No	No	No	No	No	No	No	No	No	Yes
TRIAE_CS42_3AL_TGACv1_194924_AA0642200.1	NAC-f	No	No	No	No	No	No	No	No	No	No	No	No	Yes
TRIAE_CS42_3B_TGACv1_223234_AA0778600.1	NAC-f	No	No	No	No	No	No	No	No	No	No	No	No	Yes
TRIAE_CS42_3DL_TGACv1_253070_AA0893220.1	NAC-f	No	No	No	No	No	No	No	No	No	No	No	No	Yes
TRIAE_CS42_5AL_TGACv1_374706_AA1207030.1	NAC-f	No	No	No	No	No	No	No	No	No	No	No	No	Yes
TRIAE_CS42_5BL_TGACv1_407515_AA1357640.1	NAC-f	No	No	No	No	No	No	No	No	No	No	No	No	Yes
TRIAE_CS42_5DL_TGACv1_434895_AA1443270.1	NAC-f	No	No	No	No	No	No	No	No	No	No	No	No	Yes
TRIAE_CS42_7AS_TGACv1_569085_AA1806880.1	NAC-f	No	No	No	No	No	No	No	No	No	No	No	No	Yes
TRIAE_CS42_7BS_TGACv1_592455_AA1938420.1	NAC-f	No	No	No	No	No	No	No	No	No	No	No	No	Yes
TRIAE_CS42_7DS_TGACv1_623845_AA2056760.1	NAC-f	No	No	No	No	No	No	No	No	No	No	No	No	Yes
LOC_Os03g12120.1	NAC-g	No	No	No	No	No	No	No	No	No	No	No	No	Yes
MLOC_75795.1	NAC-g	No	No	No	No	No	No	Yes	No	No	No	No	No	No
TRIAE_CS42_3AS_TGACv1_210609_AA0675620.1	NAC-g	No	No	No	No	No	No	Yes	No	No	No	No	No	No
TRIAE_CS42_3B_TGACv1_224197_AA0793760.4	NAC-g	No	No	No	No	No	No	Yes	No	No	No	No	No	No
TRIAE_CS42_3DS_TGACv1_271551_AA0902410.4	NAC-g	No	No	No	No	No	No	Yes	No	No	No	No	No	No
TRIAE_CS42_7AL_TGACv1_557911_AA1787600.1	NAC-g	No	No	No	No	No	No	No	No	No	No	No	No	Yes
TRIAE_CS42_7DL_TGACv1_602602_AA1962270.2	NAC-g	No	No	No	No	No	No	No	No	No	No	No	No	Yes
LOC_Os08g23880.1	NAC-h	No	No	No	No	No	No	No	No	No	No	No	No	Yes
LOC_Os12g22630.1	NAC-h	No	No	No	No	No	No	No	No	No	No	No	No	Yes
TRIAE_CS42_4BS_TGACv1_329104_AA1097830.1	NAC-h	No	No	No	No	No	No	No	No	No	No	No	No	Yes
TRIAE_CS42_4DS_TGACv1_362919_AA1182750.1	NAC-h	No	No	No	No	No	No	No	No	No	No	No	No	Yes
TRIAE_CS42_6AS_TGACv1_485568_AA1547750.1	NAC-h	No	No	No	No	No	No	No	No	No	No	No	No	Yes

## Sheet: Sheet2
LOC_Os02g34970.1	NAC-a	-1	#38ecd4	bold	1	0
LOC_Os04g35660.1	NAC-a	-1	#38ecd4	bold	1	0
MLOC_15681.2	NAC-a	-1	#38ecd4	bold	1	0
TRIAE_CS42_2DL_TGACv1_158876_AA0527740.2	NAC-a	-1	#38ecd4	bold	1	0
TRIAE_CS42_2BL_TGACv1_131250_AA0424990.2	NAC-a	-1	#38ecd4	bold	1	0
TRIAE_CS42_2AL_TGACv1_094614_AA0300490.1	NAC-a	-1	#38ecd4	bold	1	0
LOC_Os07g12340.1	NAC-a	-1	#38ecd4	bold	1	0
TRIAE_CS42_U_TGACv1_642999_AA2125900.1	NAC-a	-1	#38ecd4	bold	1	0
TRIAE_CS42_6BS_TGACv1_514379_AA1659010.1	NAC-a	-1	#38ecd4	bold	1	0
TRIAE_CS42_6AS_TGACv1_487653_AA1572080.1	NAC-a	-1	#38ecd4	bold	1	0
LOC_Os03g60080.1	NAC-a	-1	#38ecd4	bold	1	0
MLOC_37104.2	NAC-a	-1	#38ecd4	bold	1	0
TRIAE_CS42_5DL_TGACv1_438120_AA1467920.2	NAC-a	-1	#38ecd4	bold	1	0
TRIAE_CS42_5AL_TGACv1_373971_AA1185940.1	NAC-a	-1	#38ecd4	bold	1	0
TRIAE_CS42_5BL_TGACv1_407166_AA1354040.4	NAC-a	-1	#38ecd4	bold	1	0
LOC_Os01g60020.1	NAC-a	-1	#38ecd4	bold	1	0
TRIAE_CS42_3AL_TGACv1_194893_AA0641610.1	NAC-a	-1	#38ecd4	bold	1	0
MLOC_70929.1	NAC-a	-1	#38ecd4	bold	1	0
TRIAE_CS42_3B_TGACv1_223174_AA0777390.1	NAC-a	-1	#38ecd4	bold	1	0
TRIAE_CS42_3DL_TGACv1_250625_AA0871190.1	NAC-a	-1	#38ecd4	bold	1	0
LOC_Os11g08210.1	NAC-a	-1	#38ecd4	bold	1	0
TRIAE_CS42_4AL_TGACv1_292230_AA0998160.1	NAC-a	-1	#38ecd4	bold	1	0
TRIAE_CS42_4DS_TGACv1_361684_AA1171560.1	NAC-a	-1	#38ecd4	bold	1	0
TRIAE_CS42_4BS_TGACv1_327925_AA1078970.1	NAC-a	-1	#38ecd4	bold	1	0
MLOC_61270.3	NAC-a	-1	#38ecd4	bold	1	0
LOC_Os05g34830.1	NAC-a	-1	#38ecd4	bold	1	0
MLOC_63743.1	NAC-a	-1	#38ecd4	bold	1	0
TRIAE_CS42_1BL_TGACv1_032010_AA0124150.1	NAC-a	-1	#38ecd4	bold	1	0
TRIAE_CS42_1AL_TGACv1_002139_AA0039010.1	NAC-a	-1	#38ecd4	bold	1	0
TRIAE_CS42_1DL_TGACv1_061442_AA0195380.1	NAC-a	-1	#38ecd4	bold	1	0
LOC_Os01g66120.1	NAC-a	-1	#38ecd4	bold	1	0
MLOC_59162.1	NAC-a	-1	#38ecd4	bold	1	0
TRIAE_CS42_3B_TGACv1_221115_AA0730720.1	NAC-a	-1	#38ecd4	bold	1	0
TRIAE_CS42_3DL_TGACv1_249320_AA0845360.1	NAC-a	-1	#38ecd4	bold	1	0
TRIAE_CS42_3AL_TGACv1_194123_AA0626970.1	NAC-a	-1	#38ecd4	bold	1	0
LOC_Os07g37920.1	NAC-a	-1	#38ecd4	bold	1	0
MLOC_8116.1	NAC-a	-1	#38ecd4	bold	1	0
TRIAE_CS42_2BS_TGACv1_145996_AA0452240.1	NAC-a	-1	#38ecd4	bold	1	0
TRIAE_CS42_2AS_TGACv1_113243_AA0353410.1	NAC-a	-1	#38ecd4	bold	1	0
TRIAE_CS42_2DS_TGACv1_179582_AA0608070.3	NAC-a	-1	#38ecd4	bold	1	0
TRIAE_CS42_6AS_TGACv1_486738_AA1564640.1	NAC-a	-1	#38ecd4	bold	1	0
TRIAE_CS42_6DS_TGACv1_542626_AA1725630.1	NAC-a	-1	#38ecd4	bold	1	0
LOC_Os11g03300.1	NAC-a	-1	#38ecd4	bold	1	0
LOC_Os12g03040.1	NAC-a	-1	#38ecd4	bold	1	0
TRIAE_CS42_5BL_TGACv1_405234_AA1322970.1	NAC-a	-1	#38ecd4	bold	1	0
MLOC_4747.1	NAC-a	-1	#38ecd4	bold	1	0
TRIAE_CS42_5DL_TGACv1_436785_AA1463200.1	NAC-a	-1	#38ecd4	bold	1	0
TRIAE_CS42_5AL_TGACv1_374001_AA1187360.1	NAC-a	-1	#38ecd4	bold	1	0
TRIAE_CS42_3AS_TGACv1_210843_AA0680070.1	NAC-a	-1	#38ecd4	bold	1	0
TRIAE_CS42_3B_TGACv1_224541_AA0797800.1	NAC-a	-1	#38ecd4	bold	1	0
TRIAE_CS42_3DS_TGACv1_271491_AA0900310.1	NAC-a	-1	#38ecd4	bold	1	0
LOC_Os01g01430.1	NAC-a	-1	#38ecd4	bold	1	0
LOC_Os02g12310.1	NAC-a	-1	#38ecd4	bold	1	0
LOC_Os05g34310.1	NAC-a	-1	#38ecd4	bold	1	0
TRIAE_CS42_3B_TGACv1_224002_AA0790780.1	NAC-a	-1	#38ecd4	bold	1	0
TRIAE_CS42_3DS_TGACv1_272250_AA0917810.1	NAC-a	-1	#38ecd4	bold	1	0
TRIAE_CS42_3DS_TGACv1_272946_AA0926870.1	NAC-a	-1	#38ecd4	bold	1	0
LOC_Os03g21060.1	NAC-a	-1	#38ecd4	bold	1	0
MLOC_65101.1	NAC-a	-1	#38ecd4	bold	1	0
TRIAE_CS42_4DL_TGACv1_342726_AA1120400.1	NAC-a	-1	#38ecd4	bold	1	0
TRIAE_CS42_4AS_TGACv1_307303_AA1019290.1	NAC-a	-1	#38ecd4	bold	1	0
TRIAE_CS42_4BL_TGACv1_320737_AA1047550.1	NAC-a	-1	#38ecd4	bold	1	0
LOC_Os07g48450.1	NAC-a	-1	#38ecd4	bold	1	0
TRIAE_CS42_2AS_TGACv1_113086_AA0351020.1	NAC-a	-1	#38ecd4	bold	1	0
TRIAE_CS42_2DS_TGACv1_177687_AA0582480.1	NAC-a	-1	#38ecd4	bold	1	0
TRIAE_CS42_2AS_TGACv1_112832_AA0345940.1	NAC-a	-1	#38ecd4	bold	1	0
TRIAE_CS42_2BS_TGACv1_146243_AA0460100.1	NAC-a	-1	#38ecd4	bold	1	0
TRIAE_CS42_2DS_TGACv1_177511_AA0579140.1	NAC-a	-1	#38ecd4	bold	1	0
TRIAE_CS42_2BS_TGACv1_147904_AA0488850.1	NAC-a	-1	#38ecd4	bold	1	0
LOC_Os05g35170.1	NAC-b	-1	#ff0000	bold	1	0
TRIAE_CS42_6AS_TGACv1_485289_AA1542450.1	NAC-b	-1	#ff0000	bold	1	0
TRIAE_CS42_6BS_TGACv1_513257_AA1636370.1	NAC-b	-1	#ff0000	bold	1	0
MLOC_36942.1	NAC-b	-1	#ff0000	bold	1	0
TRIAE_CS42_2DL_TGACv1_158540_AA0521450.1	NAC-b	-1	#ff0000	bold	1	0
TRIAE_CS42_2BL_TGACv1_129841_AA0397780.1	NAC-b	-1	#ff0000	bold	1	0
TRIAE_CS42_2AL_TGACv1_093618_AA0283710.1	NAC-b	-1	#ff0000	bold	1	0
TRIAE_CS42_7DS_TGACv1_624889_AA2063750.1	NAC-b	-1	#ff0000	bold	1	0
LOC_Os08g44820.1	NAC-b	-1	#ff0000	bold	1	0
LOC_Os02g57650.1	NAC-b	-1	#ff0000	bold	1	0
TRIAE_CS42_6BL_TGACv1_500168_AA1600460.1	NAC-b	-1	#ff0000	bold	1	0
TRIAE_CS42_6AL_TGACv1_471763_AA1513980.3	NAC-b	-1	#ff0000	bold	1	0
TRIAE_CS42_6DL_TGACv1_527491_AA1704790.1	NAC-b	-1	#ff0000	bold	1	0
MLOC_20905.1	NAC-b	-1	#ff0000	bold	1	0
TRIAE_CS42_2AL_TGACv1_098328_AA0325980.1	NAC-b	-1	#ff0000	bold	1	0
TRIAE_CS42_2AL_TGACv1_095189_AA0308120.1	NAC-b	-1	#ff0000	bold	1	0
TRIAE_CS42_2AL_TGACv1_096039_AA0316870.1	NAC-b	-1	#ff0000	bold	1	0
TRIAE_CS42_2DL_TGACv1_159017_AA0530680.1	NAC-b	-1	#ff0000	bold	1	0
TRIAE_CS42_2DL_TGACv1_158027_AA0506390.1	NAC-b	-1	#ff0000	bold	1	0
LOC_Os01g15640.1	NAC-b	-1	#ff0000	bold	1	0
TRIAE_CS42_3DS_TGACv1_272013_AA0913110.1	NAC-b	-1	#ff0000	bold	1	0
TRIAE_CS42_3B_TGACv1_220765_AA0718590.1	NAC-b	-1	#ff0000	bold	1	0
MLOC_6066.1	NAC-b	-1	#ff0000	bold	1	0
TRIAE_CS42_3AS_TGACv1_213187_AA0705860.1	NAC-b	-1	#ff0000	bold	1	0
LOC_Os10g42130.1	NAC-b	-1	#ff0000	bold	1	0
TRIAE_CS42_1DL_TGACv1_063379_AA0226840.1	NAC-b	-1	#ff0000	bold	1	0
TRIAE_CS42_1BL_TGACv1_033928_AA0142640.1	NAC-b	-1	#ff0000	bold	1	0
MLOC_58950.3	NAC-b	-1	#ff0000	bold	1	0
TRIAE_CS42_1AL_TGACv1_000555_AA0014640.1	NAC-b	-1	#ff0000	bold	1	0
LOC_Os03g02800.1	NAC-b	-1	#ff0000	bold	1	0
MLOC_71128.1	NAC-b	-1	#ff0000	bold	1	0
TRIAE_CS42_5AL_TGACv1_374660_AA1205930.2	NAC-b	-1	#ff0000	bold	1	0
TRIAE_CS42_4DL_TGACv1_343654_AA1137690.1	NAC-b	-1	#ff0000	bold	1	0
TRIAE_CS42_4BL_TGACv1_321111_AA1055630.1	NAC-b	-1	#ff0000	bold	1	0
LOC_Os09g38000.1	NAC-b	-1	#ff0000	bold	1	0
MLOC_37843.1	NAC-b	-1	#ff0000	bold	1	0
TRIAE_CS42_5BL_TGACv1_407099_AA1353330.1	NAC-b	-1	#ff0000	bold	1	0
TRIAE_CS42_5DL_TGACv1_433377_AA1411490.1	NAC-b	-1	#ff0000	bold	1	0
TRIAE_CS42_5DL_TGACv1_433377_AA1411480.1	NAC-b	-1	#ff0000	bold	1	0
MLOC_37844.1	NAC-b	-1	#ff0000	bold	1	0
TRIAE_CS42_5BL_TGACv1_407099_AA1353320.1	NAC-b	-1	#ff0000	bold	1	0
TRIAE_CS42_5AL_TGACv1_375261_AA1218690.2	NAC-b	-1	#ff0000	bold	1	0
TRIAE_CS42_2AL_TGACv1_094562_AA0299690.1	NAC-b	-1	#ff0000	bold	1	0
LOC_Os09g32040.1	NAC-b	-1	#ff0000	bold	1	0
TRIAE_CS42_5DL_TGACv1_435993_AA1457080.1	NAC-b	-1	#ff0000	bold	1	0
TRIAE_CS42_5BL_TGACv1_405921_AA1337700.1	NAC-b	-1	#ff0000	bold	1	0
TRIAE_CS42_5AL_TGACv1_375225_AA1218100.1	NAC-b	-1	#ff0000	bold	1	0
LOC_Os08g06140.1	NAC-b	-1	#ff0000	bold	1	0
TRIAE_CS42_7DL_TGACv1_604389_AA1997650.3	NAC-b	-1	#ff0000	bold	1	0
TRIAE_CS42_7AL_TGACv1_556820_AA1771630.6	NAC-b	-1	#ff0000	bold	1	0
TRIAE_CS42_7BL_TGACv1_578088_AA1889220.3	NAC-b	-1	#ff0000	bold	1	0
MLOC_50406.5	NAC-b	-1	#ff0000	bold	1	0
LOC_Os06g01230.1	NAC-b	-1	#ff0000	bold	1	0
MLOC_75297.2	NAC-b	-1	#ff0000	bold	1	0
TRIAE_CS42_4AL_TGACv1_290399_AA0984980.3	NAC-b	-1	#ff0000	bold	1	0
TRIAE_CS42_7AS_TGACv1_569206_AA1810310.1	NAC-b	-1	#ff0000	bold	1	0
TRIAE_CS42_7DS_TGACv1_624344_AA2060640.1	NAC-b	-1	#ff0000	bold	1	0
TRIAE_CS42_2BL_TGACv1_130049_AA0402430.1	NAC-c	-1	#0cff00	bold	1	0
TRIAE_CS42_2AL_TGACv1_095427_AA0310620.1	NAC-c	-1	#0cff00	bold	1	0
TRIAE_CS42_2DL_TGACv1_159001_AA0530380.1	NAC-c	-1	#0cff00	bold	1	0
MLOC_19175.1	NAC-c	-1	#0cff00	bold	1	0
LOC_Os02g15340.1	NAC-c	-1	#0cff00	bold	1	0
TRIAE_CS42_7DL_TGACv1_604654_AA2000360.2	NAC-c	-1	#0cff00	bold	1	0
LOC_Os06g33940.1	NAC-c	-1	#0cff00	bold	1	0
TRIAE_CS42_7BL_TGACv1_580920_AA1915940.1	NAC-c	-1	#0cff00	bold	1	0
MLOC_17128.1	NAC-c	-1	#0cff00	bold	1	0
TRIAE_CS42_7AL_TGACv1_556071_AA1754590.1	NAC-c	-1	#0cff00	bold	1	0
LOC_Os08g02300.1	NAC-c	-1	#0cff00	bold	1	0
MLOC_66924.2	NAC-c	-1	#0cff00	bold	1	0
TRIAE_CS42_7AL_TGACv1_558463_AA1793550.1	NAC-c	-1	#0cff00	bold	1	0
TRIAE_CS42_7DL_TGACv1_603576_AA1985860.3	NAC-c	-1	#0cff00	bold	1	0
LOC_Os06g04090.1	NAC-c	-1	#0cff00	bold	1	0
TRIAE_CS42_4AL_TGACv1_289038_AA0963850.1	NAC-c	-1	#0cff00	bold	1	0
TRIAE_CS42_4AL_TGACv1_289844_AA0977690.1	NAC-c	-1	#0cff00	bold	1	0
TRIAE_CS42_7DS_TGACv1_624826_AA2063410.1	NAC-c	-1	#0cff00	bold	1	0
TRIAE_CS42_4AL_TGACv1_290141_AA0982120.1	NAC-c	-1	#0cff00	bold	1	0
TRIAE_CS42_U_TGACv1_644928_AA2142300.1	NAC-c	-1	#0cff00	bold	1	0
TRIAE_CS42_7DS_TGACv1_621783_AA2026010.1	NAC-c	-1	#0cff00	bold	1	0
TRIAE_CS42_4AL_TGACv1_288222_AA0941150.1	NAC-c	-1	#0cff00	bold	1	0
TRIAE_CS42_7DS_TGACv1_622568_AA2041990.1	NAC-c	-1	#0cff00	bold	1	0
TRIAE_CS42_4AL_TGACv1_292332_AA0998470.1	NAC-c	-1	#0cff00	bold	1	0
TRIAE_CS42_7DS_TGACv1_622066_AA2032070.1	NAC-c	-1	#0cff00	bold	1	0
TRIAE_CS42_4AL_TGACv1_289844_AA0977700.1	NAC-c	-1	#0cff00	bold	1	0
TRIAE_CS42_7AS_TGACv1_570805_AA1841120.1	NAC-c	-1	#0cff00	bold	1	0
MLOC_65480.1	NAC-c	-1	#0cff00	bold	1	0
MLOC_75524.1	NAC-c	-1	#0cff00	bold	1	0
TRIAE_CS42_4AL_TGACv1_288367_AA0946570.1	NAC-c	-1	#0cff00	bold	1	0
TRIAE_CS42_4AL_TGACv1_288367_AA0946600.1	NAC-c	-1	#0cff00	bold	1	0
TRIAE_CS42_7DS_TGACv1_622629_AA2042860.1	NAC-c	-1	#0cff00	bold	1	0
LOC_Os06g01480.1	NAC-c	-1	#0cff00	bold	1	0
TRIAE_CS42_7AS_TGACv1_569292_AA1812550.1	NAC-c	-1	#0cff00	bold	1	0
TRIAE_CS42_4AL_TGACv1_288585_AA0953020.1	NAC-c	-1	#0cff00	bold	1	0
MLOC_53086.2	NAC-c	-1	#0cff00	bold	1	0
TRIAE_CS42_7DS_TGACv1_621407_AA2014500.1	NAC-c	-1	#0cff00	bold	1	0
TRIAE_CS42_2DL_TGACv1_160108_AA0546880.1	NAC-c	-1	#0cff00	bold	1	0
TRIAE_CS42_2BL_TGACv1_130441_AA0411470.1	NAC-c	-1	#0cff00	bold	1	0
MLOC_15746.1	NAC-c	-1	#0cff00	bold	1	0
TRIAE_CS42_U_TGACv1_644278_AA2138500.1	NAC-c	-1	#0cff00	bold	1	0
LOC_Os02g42970.1	NAC-c	-1	#0cff00	bold	1	0
MLOC_56103.1	NAC-c	-1	#0cff00	bold	1	0
TRIAE_CS42_6BL_TGACv1_500431_AA1604420.1	NAC-c	-1	#0cff00	bold	1	0
TRIAE_CS42_6AL_TGACv1_472990_AA1527910.1	NAC-c	-1	#0cff00	bold	1	0
TRIAE_CS42_6DL_TGACv1_526634_AA1688740.1	NAC-c	-1	#0cff00	bold	1	0
LOC_Os10g38834.1	NAC-c	-1	#0cff00	bold	1	0
LOC_Os03g03540.1	NAC-c	-1	#0cff00	bold	1	0
MLOC_56769.1	NAC-c	-1	#0cff00	bold	1	0
TRIAE_CS42_5AL_TGACv1_374586_AA1203930.1	NAC-c	-1	#0cff00	bold	1	0
TRIAE_CS42_4DL_TGACv1_345017_AA1151060.1	NAC-c	-1	#0cff00	bold	1	0
LOC_Os08g01330.1	NAC-c	-1	#0cff00	bold	1	0
LOC_Os04g59470.1	NAC-c	-1	#0cff00	bold	1	0
TRIAE_CS42_7AL_TGACv1_556170_AA1757400.1	NAC-c	-1	#0cff00	bold	1	0
MLOC_19933.1	NAC-c	-1	#0cff00	bold	1	0
TRIAE_CS42_7BL_TGACv1_581398_AA1917230.1	NAC-c	-1	#0cff00	bold	1	0
TRIAE_CS42_7DL_TGACv1_604385_AA1997610.1	NAC-c	-1	#0cff00	bold	1	0
TRIAE_CS42_2BL_TGACv1_129453_AA0384490.1	NAC-c	-1	#0cff00	bold	1	0
TRIAE_CS42_2DL_TGACv1_157932_AA0502420.1	NAC-c	-1	#0cff00	bold	1	0
TRIAE_CS42_2BL_TGACv1_129453_AA0384510.1	NAC-c	-1	#0cff00	bold	1	0
TRIAE_CS42_2DL_TGACv1_157932_AA0502430.1	NAC-c	-1	#0cff00	bold	1	0
TRIAE_CS42_2BL_TGACv1_129453_AA0384480.1	NAC-c	-1	#0cff00	bold	1	0
TRIAE_CS42_2AL_TGACv1_093024_AA0269720.1	NAC-c	-1	#0cff00	bold	1	0
TRIAE_CS42_2DL_TGACv1_157932_AA0502440.1	NAC-c	-1	#0cff00	bold	1	0
MLOC_66083.1	NAC-c	-1	#0cff00	bold	1	0
MLOC_67250.1	NAC-c	-1	#0cff00	bold	1	0
TRIAE_CS42_2AL_TGACv1_093527_AA0281830.1	NAC-c	-1	#0cff00	bold	1	0
TRIAE_CS42_2AL_TGACv1_093527_AA0281800.1	NAC-c	-1	#0cff00	bold	1	0
TRIAE_CS42_2AL_TGACv1_094353_AA0296380.1	NAC-c	-1	#0cff00	bold	1	0
TRIAE_CS42_2DL_TGACv1_157932_AA0502410.1	NAC-c	-1	#0cff00	bold	1	0
TRIAE_CS42_2AL_TGACv1_093024_AA0269730.1	NAC-c	-1	#0cff00	bold	1	0
TRIAE_CS42_2BL_TGACv1_129453_AA0384460.1	NAC-c	-1	#0cff00	bold	1	0
TRIAE_CS42_2AL_TGACv1_093527_AA0281840.1	NAC-c	-1	#0cff00	bold	1	0
LOC_Os03g01870.1	NAC-d	-1	#0027ff	bold	1	0
LOC_Os02g56600.1	NAC-d	-1	#0027ff	bold	1	0
LOC_Os10g33760.1	NAC-d	-1	#0027ff	bold	1	0
LOC_Os02g41450.1	NAC-d	-1	#0027ff	bold	1	0
LOC_Os04g43560.1	NAC-d	-1	#0027ff	bold	1	0
MLOC_12466.2	NAC-d	-1	#0027ff	bold	1	0
TRIAE_CS42_2AL_TGACv1_095101_AA0306920.2	NAC-d	-1	#0027ff	bold	1	0
TRIAE_CS42_2BL_TGACv1_132584_AA0438520.1	NAC-d	-1	#0027ff	bold	1	0
TRIAE_CS42_U_TGACv1_642816_AA2123650.1	NAC-d	-1	#0027ff	bold	1	0
TRIAE_CS42_6BL_TGACv1_500589_AA1606780.1	NAC-d	-1	#0027ff	bold	1	0
TRIAE_CS42_6BL_TGACv1_501225_AA1615050.1	NAC-d	-1	#0027ff	bold	1	0
TRIAE_CS42_6DL_TGACv1_527970_AA1710360.1	NAC-d	-1	#0027ff	bold	1	0
TRIAE_CS42_6BL_TGACv1_501598_AA1619180.1	NAC-d	-1	#0027ff	bold	1	0
TRIAE_CS42_U_TGACv1_641159_AA2086980.1	NAC-d	-1	#0027ff	bold	1	0
MLOC_5165.1	NAC-d	-1	#0027ff	bold	1	0
TRIAE_CS42_U_TGACv1_641159_AA2086960.1	NAC-d	-1	#0027ff	bold	1	0
TRIAE_CS42_6AL_TGACv1_471424_AA1508490.1	NAC-d	-1	#0027ff	bold	1	0
LOC_Os12g41680.1	NAC-d	-1	#0027ff	bold	1	0
MLOC_64240.2	NAC-d	-1	#0027ff	bold	1	0
TRIAE_CS42_5BS_TGACv1_423369_AA1375270.2	NAC-d	-1	#0027ff	bold	1	0
TRIAE_CS42_5DS_TGACv1_457110_AA1482510.2	NAC-d	-1	#0027ff	bold	1	0
TRIAE_CS42_2AL_TGACv1_094906_AA0304730.1	NAC-d	-1	#0027ff	bold	1	0
TRIAE_CS42_2DL_TGACv1_158467_AA0519480.1	NAC-d	-1	#0027ff	bold	1	0
TRIAE_CS42_2BL_TGACv1_129321_AA0378540.1	NAC-d	-1	#0027ff	bold	1	0
LOC_Os08g10080.1	NAC-d	-1	#0027ff	bold	1	0
TRIAE_CS42_7BL_TGACv1_577855_AA1884660.1	NAC-d	-1	#0027ff	bold	1	0
TRIAE_CS42_7DL_TGACv1_604393_AA1997730.1	NAC-d	-1	#0027ff	bold	1	0
LOC_Os04g52810.1	NAC-d	-1	#0027ff	bold	1	0
TRIAE_CS42_7AL_TGACv1_556250_AA1759120.2	NAC-d	-1	#0027ff	bold	1	0
LOC_Os02g06950.1	NAC-d	-1	#0027ff	bold	1	0
LOC_Os06g46270.1	NAC-d	-1	#0027ff	bold	1	0
TRIAE_CS42_7DL_TGACv1_604258_AA1995950.1	NAC-d	-1	#0027ff	bold	1	0
TRIAE_CS42_7AL_TGACv1_556426_AA1762740.1	NAC-d	-1	#0027ff	bold	1	0
TRIAE_CS42_7BL_TGACv1_579312_AA1906270.1	NAC-d	-1	#0027ff	bold	1	0
MLOC_25708.2	NAC-d	-1	#0027ff	bold	1	0
MLOC_53744.1	NAC-d	-1	#0027ff	bold	1	0
TRIAE_CS42_7BL_TGACv1_579057_AA1903540.1	NAC-d	-1	#0027ff	bold	1	0
TRIAE_CS42_7DL_TGACv1_603301_AA1980400.1	NAC-d	-1	#0027ff	bold	1	0
TRIAE_CS42_7AL_TGACv1_558854_AA1796490.1	NAC-d	-1	#0027ff	bold	1	0
LOC_Os08g40030.1	NAC-d	-1	#0027ff	bold	1	0
TRIAE_CS42_7BS_TGACv1_592031_AA1928790.1	NAC-d	-1	#0027ff	bold	1	0
TRIAE_CS42_7AS_TGACv1_569459_AA1816500.1	NAC-d	-1	#0027ff	bold	1	0
TRIAE_CS42_7DS_TGACv1_624617_AA2062220.1	NAC-d	-1	#0027ff	bold	1	0
MLOC_13932.1	NAC-d	-1	#0027ff	bold	1	0
LOC_Os06g23650.1	NAC-d	-1	#0027ff	bold	1	0
MLOC_65286.1	NAC-d	-1	#0027ff	bold	1	0
TRIAE_CS42_7AL_TGACv1_556150_AA1757040.1	NAC-d	-1	#0027ff	bold	1	0
TRIAE_CS42_7DL_TGACv1_603025_AA1974000.1	NAC-d	-1	#0027ff	bold	1	0
TRIAE_CS42_7BL_TGACv1_577097_AA1865870.1	NAC-d	-1	#0027ff	bold	1	0
LOC_Os09g32260.1	NAC-d	-1	#0027ff	bold	1	0
TRIAE_CS42_5DL_TGACv1_437691_AA1467130.1	NAC-d	-1	#0027ff	bold	1	0
TRIAE_CS42_5BL_TGACv1_407438_AA1356890.1	NAC-d	-1	#0027ff	bold	1	0
TRIAE_CS42_5AL_TGACv1_377105_AA1244130.1	NAC-d	-1	#0027ff	bold	1	0
MLOC_68185.2	NAC-d	-1	#0027ff	bold	1	0
LOC_Os03g42630.1	NAC-d	-1	#0027ff	bold	1	0
MLOC_68284.1	NAC-d	-1	#0027ff	bold	1	0
TRIAE_CS42_4AL_TGACv1_289704_AA0975610.1	NAC-d	-1	#0027ff	bold	1	0
TRIAE_CS42_4BS_TGACv1_327976_AA1080270.1	NAC-d	-1	#0027ff	bold	1	0
TRIAE_CS42_4DS_TGACv1_361834_AA1173430.1	NAC-d	-1	#0027ff	bold	1	0
LOC_Os02g36880.1	NAC-d	-1	#0027ff	bold	1	0
LOC_Os04g38720.1	NAC-d	-1	#0027ff	bold	1	0
TRIAE_CS42_2BL_TGACv1_133608_AA0442820.1	NAC-d	-1	#0027ff	bold	1	0
TRIAE_CS42_2AL_TGACv1_093319_AA0277330.1	NAC-d	-1	#0027ff	bold	1	0
TRIAE_CS42_2DL_TGACv1_158215_AA0512750.1	NAC-d	-1	#0027ff	bold	1	0
LOC_Os11g03370.1	NAC-d	-1	#0027ff	bold	1	0
LOC_Os11g03310.1	NAC-d	-1	#0027ff	bold	1	0
LOC_Os12g03050.1	NAC-d	-1	#0027ff	bold	1	0
MLOC_5832.1	NAC-d	-1	#0027ff	bold	1	0
TRIAE_CS42_5AL_TGACv1_374001_AA1187350.1	NAC-d	-1	#0027ff	bold	1	0
TRIAE_CS42_5BL_TGACv1_405569_AA1330600.1	NAC-d	-1	#0027ff	bold	1	0
TRIAE_CS42_5DL_TGACv1_436785_AA1463190.1	NAC-d	-1	#0027ff	bold	1	0
LOC_Os03g21030.1	NAC-d	-1	#0027ff	bold	1	0
MLOC_64057.2	NAC-d	-1	#0027ff	bold	1	0
TRIAE_CS42_4BL_TGACv1_322713_AA1072770.1	NAC-d	-1	#0027ff	bold	1	0
TRIAE_CS42_4DL_TGACv1_342407_AA1112880.1	NAC-d	-1	#0027ff	bold	1	0
TRIAE_CS42_4AS_TGACv1_306855_AA1014220.1	NAC-d	-1	#0027ff	bold	1	0
LOC_Os07g48550.1	NAC-d	-1	#0027ff	bold	1	0
MLOC_65714.1	NAC-d	-1	#0027ff	bold	1	0
TRIAE_CS42_U_TGACv1_641123_AA2086190.1	NAC-d	-1	#0027ff	bold	1	0
TRIAE_CS42_2DS_TGACv1_177136_AA0566150.1	NAC-d	-1	#0027ff	bold	1	0
TRIAE_CS42_2AS_TGACv1_112119_AA0330900.1	NAC-d	-1	#0027ff	bold	1	0
MLOC_65400.1	NAC-d	-1	#0027ff	bold	1	0
TRIAE_CS42_2AS_TGACv1_113123_AA0351630.1	NAC-d	-1	#0027ff	bold	1	0
TRIAE_CS42_2BS_TGACv1_146614_AA0469500.1	NAC-d	-1	#0027ff	bold	1	0
TRIAE_CS42_2DS_TGACv1_177294_AA0572540.1	NAC-d	-1	#0027ff	bold	1	0
TRIAE_CS42_2AS_TGACv1_113960_AA0362760.1	NAC-d	-1	#0027ff	bold	1	0
TRIAE_CS42_2DS_TGACv1_177206_AA0568970.1	NAC-d	-1	#0027ff	bold	1	0
TRIAE_CS42_2DS_TGACv1_177136_AA0566130.2	NAC-d	-1	#0027ff	bold	1	0
TRIAE_CS42_2AS_TGACv1_113796_AA0360690.1	NAC-d	-1	#0027ff	bold	1	0
TRIAE_CS42_2BS_TGACv1_146451_AA0465500.1	NAC-d	-1	#0027ff	bold	1	0
TRIAE_CS42_2BS_TGACv1_147330_AA0481860.1	NAC-d	-1	#0027ff	bold	1	0
TRIAE_CS42_2BS_TGACv1_148552_AA0493700.1	NAC-d	-1	#0027ff	bold	1	0
LOC_Os01g29840.1	NAC-d	-1	#0027ff	bold	1	0
LOC_Os01g01470.1	NAC-d	-1	#0027ff	bold	1	0
TRIAE_CS42_7AL_TGACv1_556203_AA1758120.1	NAC-d	-1	#0027ff	bold	1	0
MLOC_56943.2	NAC-d	-1	#0027ff	bold	1	0
TRIAE_CS42_7DL_TGACv1_602807_AA1969110.2	NAC-d	-1	#0027ff	bold	1	0
TRIAE_CS42_7BL_TGACv1_578094_AA1889360.1	NAC-d	-1	#0027ff	bold	1	0
TRIAE_CS42_7DL_TGACv1_602807_AA1969140.1	NAC-d	-1	#0027ff	bold	1	0
TRIAE_CS42_7AL_TGACv1_556203_AA1758130.1	NAC-d	-1	#0027ff	bold	1	0
TRIAE_CS42_5AL_TGACv1_377157_AA1244560.2	NAC-d	-1	#0027ff	bold	1	0
MLOC_72737.1	NAC-d	-1	#0027ff	bold	1	0
TRIAE_CS42_3AS_TGACv1_210879_AA0680650.1	NAC-d	-1	#0027ff	bold	1	0
TRIAE_CS42_3B_TGACv1_220886_AA0722540.1	NAC-d	-1	#0027ff	bold	1	0
MLOC_58272.1	NAC-d	-1	#0027ff	bold	1	0
TRIAE_CS42_7BS_TGACv1_591807_AA1921930.2	NAC-d	-1	#0027ff	bold	1	0
TRIAE_CS42_7AS_TGACv1_571374_AA1847200.1	NAC-d	-1	#0027ff	bold	1	0
TRIAE_CS42_7DS_TGACv1_623144_AA2049980.1	NAC-d	-1	#0027ff	bold	1	0
TRIAE_CS42_3DS_TGACv1_273115_AA0928510.1	NAC-d	-1	#0027ff	bold	1	0
MLOC_63121.1	NAC-d	-1	#0027ff	bold	1	0
TRIAE_CS42_3B_TGACv1_220886_AA0722550.1	NAC-d	-1	#0027ff	bold	1	0
MLOC_57427.1	NAC-d	-1	#0027ff	bold	1	0
TRIAE_CS42_U_TGACv1_641082_AA2084530.1	NAC-d	-1	#0027ff	bold	1	0
TRIAE_CS42_7DS_TGACv1_623146_AA2050060.1	NAC-d	-1	#0027ff	bold	1	0
TRIAE_CS42_7BS_TGACv1_593125_AA1948430.1	NAC-d	-1	#0027ff	bold	1	0
MLOC_5374.1	NAC-d	-1	#0027ff	bold	1	0
TRIAE_CS42_7AS_TGACv1_570609_AA1838180.1	NAC-d	-1	#0027ff	bold	1	0
TRIAE_CS42_7BS_TGACv1_592641_AA1942120.1	NAC-d	-1	#0027ff	bold	1	0
TRIAE_CS42_7DS_TGACv1_623437_AA2053190.1	NAC-d	-1	#0027ff	bold	1	0
LOC_Os12g43530.1	NAC-e	-1	#aa00ff	bold	1	0
LOC_Os07g04560.1	NAC-e	-1	#aa00ff	bold	1	0
LOC_Os03g56580.1	NAC-e	-1	#aa00ff	bold	1	0
TRIAE_CS42_5BL_TGACv1_407248_AA1354840.1	NAC-e	-1	#aa00ff	bold	1	0
MLOC_4952.1	NAC-e	-1	#aa00ff	bold	1	0
TRIAE_CS42_5DL_TGACv1_434938_AA1443870.1	NAC-e	-1	#aa00ff	bold	1	0
MLOC_66348.1	NAC-e	-1	#aa00ff	bold	1	0
TRIAE_CS42_5AL_TGACv1_375306_AA1219530.1	NAC-e	-1	#aa00ff	bold	1	0
TRIAE_CS42_5AL_TGACv1_375704_AA1225840.1	NAC-e	-1	#aa00ff	bold	1	0
TRIAE_CS42_5BL_TGACv1_404290_AA1294020.1	NAC-e	-1	#aa00ff	bold	1	0
TRIAE_CS42_5AL_TGACv1_375952_AA1229310.1	NAC-e	-1	#aa00ff	bold	1	0
TRIAE_CS42_5BL_TGACv1_404290_AA1294030.1	NAC-e	-1	#aa00ff	bold	1	0
TRIAE_CS42_5DL_TGACv1_434594_AA1438480.1	NAC-e	-1	#aa00ff	bold	1	0
TRIAE_CS42_5DL_TGACv1_437385_AA1466090.1	NAC-e	-1	#aa00ff	bold	1	0
TRIAE_CS42_6AL_TGACv1_470993_AA1500390.1	NAC-e	-1	#aa00ff	bold	1	0
TRIAE_CS42_6DL_TGACv1_526724_AA1690540.1	NAC-e	-1	#aa00ff	bold	1	0
TRIAE_CS42_6BL_TGACv1_501580_AA1619070.1	NAC-e	-1	#aa00ff	bold	1	0
LOC_Os08g33910.1	NAC-e	-1	#aa00ff	bold	1	0
TRIAE_CS42_2DS_TGACv1_178152_AA0591910.1	NAC-e	-1	#aa00ff	bold	1	0
TRIAE_CS42_2AS_TGACv1_112895_AA0347050.1	NAC-e	-1	#aa00ff	bold	1	0
TRIAE_CS42_2BS_TGACv1_147190_AA0479440.1	NAC-e	-1	#aa00ff	bold	1	0
TRIAE_CS42_5BL_TGACv1_406000_AA1338890.1	NAC-e	-1	#aa00ff	bold	1	0
TRIAE_CS42_5DL_TGACv1_442033_AA1469530.1	NAC-e	-1	#aa00ff	bold	1	0
TRIAE_CS42_2BS_TGACv1_147190_AA0479450.1	NAC-e	-1	#aa00ff	bold	1	0
TRIAE_CS42_2DS_TGACv1_178152_AA0591920.1	NAC-e	-1	#aa00ff	bold	1	0
TRIAE_CS42_2AS_TGACv1_112895_AA0347040.1	NAC-e	-1	#aa00ff	bold	1	0
TRIAE_CS42_2AS_TGACv1_112895_AA0347030.1	NAC-e	-1	#aa00ff	bold	1	0
TRIAE_CS42_2DS_TGACv1_178152_AA0591930.1	NAC-e	-1	#aa00ff	bold	1	0
MLOC_60079.1	NAC-e	-1	#aa00ff	bold	1	0
TRIAE_CS42_2BS_TGACv1_147190_AA0479460.1	NAC-e	-1	#aa00ff	bold	1	0
TRIAE_CS42_1DS_TGACv1_080190_AA0242510.1	NAC-e	-1	#aa00ff	bold	1	0
LOC_Os06g51070.1	NAC-e	-1	#aa00ff	bold	1	0
TRIAE_CS42_7AL_TGACv1_556597_AA1766590.1	NAC-e	-1	#aa00ff	bold	1	0
TRIAE_CS42_7BL_TGACv1_577598_AA1879210.1	NAC-e	-1	#aa00ff	bold	1	0
MLOC_15184.1	NAC-e	-1	#aa00ff	bold	1	0
LOC_Os03g04070.1	NAC-e	-1	#aa00ff	bold	1	0
TRIAE_CS42_5AL_TGACv1_376992_AA1243070.1	NAC-e	-1	#aa00ff	bold	1	0
TRIAE_CS42_4DL_TGACv1_343593_AA1137090.1	NAC-e	-1	#aa00ff	bold	1	0
TRIAE_CS42_5AL_TGACv1_374631_AA1204930.1	NAC-e	-1	#aa00ff	bold	1	0
TRIAE_CS42_4BL_TGACv1_321714_AA1064450.1	NAC-e	-1	#aa00ff	bold	1	0
TRIAE_CS42_4BL_TGACv1_320661_AA1045860.1	NAC-e	-1	#aa00ff	bold	1	0
TRIAE_CS42_4BL_TGACv1_320661_AA1045870.1	NAC-e	-1	#aa00ff	bold	1	0
TRIAE_CS42_4BL_TGACv1_322715_AA1072790.1	NAC-e	-1	#aa00ff	bold	1	0
MLOC_65456.1	NAC-e	-1	#aa00ff	bold	1	0
TRIAE_CS42_U_TGACv1_643195_AA2128790.1	NAC-e	-1	#aa00ff	bold	1	0
TRIAE_CS42_4BL_TGACv1_322246_AA1069960.1	NAC-e	-1	#aa00ff	bold	1	0
TRIAE_CS42_4DL_TGACv1_342906_AA1125140.1	NAC-e	-1	#aa00ff	bold	1	0
LOC_Os08g02160.1	NAC-e	-1	#aa00ff	bold	1	0
MLOC_37364.1	NAC-e	-1	#aa00ff	bold	1	0
TRIAE_CS42_7BL_TGACv1_580562_AA1914580.1	NAC-e	-1	#aa00ff	bold	1	0
TRIAE_CS42_7DL_TGACv1_603425_AA1983440.1	NAC-e	-1	#aa00ff	bold	1	0
TRIAE_CS42_7AL_TGACv1_556505_AA1764420.1	NAC-e	-1	#aa00ff	bold	1	0
TRIAE_CS42_3B_TGACv1_221063_AA0728830.1	NAC-e	-1	#aa00ff	bold	1	0
MLOC_57215.1	NAC-e	-1	#aa00ff	bold	1	0
TRIAE_CS42_3AL_TGACv1_194680_AA0637700.1	NAC-e	-1	#aa00ff	bold	1	0
TRIAE_CS42_3DL_TGACv1_251703_AA0884000.1	NAC-e	-1	#aa00ff	bold	1	0
LOC_Os01g66490.1	NAC-e	-1	#aa00ff	bold	1	0
LOC_Os05g34600.1	NAC-e	-1	#aa00ff	bold	1	0
TRIAE_CS42_1DL_TGACv1_061395_AA0194070.1	NAC-e	-1	#aa00ff	bold	1	0
TRIAE_CS42_1AL_TGACv1_001239_AA0027650.1	NAC-e	-1	#aa00ff	bold	1	0
MLOC_69621.2	NAC-e	-1	#aa00ff	bold	1	0
TRIAE_CS42_1BL_TGACv1_031320_AA0111530.1	NAC-e	-1	#aa00ff	bold	1	0
LOC_Os12g05990.1	NAC-e	-1	#aa00ff	bold	1	0
LOC_Os11g05614.1	NAC-e	-1	#aa00ff	bold	1	0
TRIAE_CS42_5DL_TGACv1_436001_AA1457180.1	NAC-e	-1	#aa00ff	bold	1	0
TRIAE_CS42_5AL_TGACv1_376003_AA1230550.1	NAC-e	-1	#aa00ff	bold	1	0
MLOC_60153.1	NAC-e	-1	#aa00ff	bold	1	0
LOC_Os11g45950.1	NAC-e	-1	#aa00ff	bold	1	0
LOC_Os01g64310.1	NAC-e	-1	#aa00ff	bold	1	0
TRIAE_CS42_3AL_TGACv1_193821_AA0620220.1	NAC-e	-1	#aa00ff	bold	1	0
TRIAE_CS42_3B_TGACv1_221325_AA0737380.2	NAC-e	-1	#aa00ff	bold	1	0
TRIAE_CS42_3DL_TGACv1_249309_AA0844910.1	NAC-e	-1	#aa00ff	bold	1	0
LOC_Os05g37080.1	NAC-e	-1	#aa00ff	bold	1	0
TRIAE_CS42_1AL_TGACv1_002630_AA0043960.1	NAC-e	-1	#aa00ff	bold	1	0
TRIAE_CS42_1DL_TGACv1_063105_AA0223920.1	NAC-e	-1	#aa00ff	bold	1	0
TRIAE_CS42_1BL_TGACv1_031175_AA0109210.1	NAC-e	-1	#aa00ff	bold	1	0
MLOC_7757.1	NAC-e	-1	#aa00ff	bold	1	0
TRIAE_CS42_1AL_TGACv1_002630_AA0043970.1	NAC-e	-1	#aa00ff	bold	1	0
TRIAE_CS42_1BL_TGACv1_031175_AA0109220.1	NAC-e	-1	#aa00ff	bold	1	0
TRIAE_CS42_1DL_TGACv1_064163_AA0233000.1	NAC-e	-1	#aa00ff	bold	1	0
LOC_Os09g24560.1	NAC-f	-1	#d6bb31	bold	1	0
LOC_Os08g33670.1	NAC-f	-1	#d6bb31	bold	1	0
LOC_Os12g29330.1	NAC-f	-1	#d6bb31	bold	1	0
LOC_Os11g31330.1	NAC-f	-1	#d6bb31	bold	1	0
LOC_Os11g31370.1	NAC-f	-1	#d6bb31	bold	1	0
LOC_Os11g31380.1	NAC-f	-1	#d6bb31	bold	1	0
LOC_Os11g31360.1	NAC-f	-1	#d6bb31	bold	1	0
LOC_Os11g31340.1	NAC-f	-1	#d6bb31	bold	1	0
LOC_Os01g70110.1	NAC-f	-1	#d6bb31	bold	1	0
TRIAE_CS42_3AL_TGACv1_194924_AA0642200.1	NAC-f	-1	#d6bb31	bold	1	0
TRIAE_CS42_3B_TGACv1_223234_AA0778600.1	NAC-f	-1	#d6bb31	bold	1	0
TRIAE_CS42_3DL_TGACv1_253070_AA0893220.1	NAC-f	-1	#d6bb31	bold	1	0
LOC_Os09g33490.1	NAC-f	-1	#d6bb31	bold	1	0
TRIAE_CS42_5DL_TGACv1_434895_AA1443270.1	NAC-f	-1	#d6bb31	bold	1	0
MLOC_55957.2	NAC-f	-1	#d6bb31	bold	1	0
TRIAE_CS42_5BL_TGACv1_407515_AA1357640.1	NAC-f	-1	#d6bb31	bold	1	0
TRIAE_CS42_5AL_TGACv1_374706_AA1207030.1	NAC-f	-1	#d6bb31	bold	1	0
TRIAE_CS42_2DL_TGACv1_157958_AA0503600.1	NAC-f	-1	#d6bb31	bold	1	0
TRIAE_CS42_2BL_TGACv1_130517_AA0412720.1	NAC-f	-1	#d6bb31	bold	1	0
MLOC_64644.2	NAC-f	-1	#d6bb31	bold	1	0
TRIAE_CS42_2BL_TGACv1_130517_AA0412730.1	NAC-f	-1	#d6bb31	bold	1	0
TRIAE_CS42_2DL_TGACv1_157958_AA0503610.1	NAC-f	-1	#d6bb31	bold	1	0
LOC_Os08g42400.1	NAC-f	-1	#d6bb31	bold	1	0
TRIAE_CS42_7AS_TGACv1_569085_AA1806880.1	NAC-f	-1	#d6bb31	bold	1	0
MLOC_67296.1	NAC-f	-1	#d6bb31	bold	1	0
TRIAE_CS42_7DS_TGACv1_623845_AA2056760.1	NAC-f	-1	#d6bb31	bold	1	0
TRIAE_CS42_7BS_TGACv1_592455_AA1938420.1	NAC-f	-1	#d6bb31	bold	1	0
TRIAE_CS42_2BL_TGACv1_134090_AA0443670.1	NAC-g	-1	#ff00f3	bold	1	0
TRIAE_CS42_2AL_TGACv1_096957_AA0322260.1	NAC-g	-1	#ff00f3	bold	1	0
TRIAE_CS42_7BS_TGACv1_591949_AA1926380.1	NAC-g	-1	#ff00f3	bold	1	0
TRIAE_CS42_7DS_TGACv1_623994_AA2058170.1	NAC-g	-1	#ff00f3	bold	1	0
TRIAE_CS42_5AS_TGACv1_392523_AA1259890.1	NAC-g	-1	#ff00f3	bold	1	0
TRIAE_CS42_7DL_TGACv1_602602_AA1962270.2	NAC-g	-1	#ff00f3	bold	1	0
TRIAE_CS42_7AL_TGACv1_557911_AA1787600.1	NAC-g	-1	#ff00f3	bold	1	0
TRIAE_CS42_7AL_TGACv1_556883_AA1772760.1	NAC-g	-1	#ff00f3	bold	1	0
TRIAE_CS42_7DL_TGACv1_604890_AA2002740.2	NAC-g	-1	#ff00f3	bold	1	0
TRIAE_CS42_7BL_TGACv1_580306_AA1913290.1	NAC-g	-1	#ff00f3	bold	1	0
LOC_Os10g27390.1	NAC-g	-1	#ff00f3	bold	1	0
LOC_Os10g27360.1	NAC-g	-1	#ff00f3	bold	1	0
LOC_Os10g27380.1	NAC-g	-1	#ff00f3	bold	1	0
LOC_Os10g25640.1	NAC-g	-1	#ff00f3	bold	1	0
LOC_Os10g26240.1	NAC-g	-1	#ff00f3	bold	1	0
LOC_Os10g25620.1	NAC-g	-1	#ff00f3	bold	1	0
TRIAE_CS42_2DL_TGACv1_158349_AA0516330.1	NAC-g	-1	#ff00f3	bold	1	0
TRIAE_CS42_2BL_TGACv1_130088_AA0403570.1	NAC-g	-1	#ff00f3	bold	1	0
TRIAE_CS42_3B_TGACv1_224197_AA0793760.4	NAC-g	-1	#ff00f3	bold	1	0
MLOC_75795.1	NAC-g	-1	#ff00f3	bold	1	0
TRIAE_CS42_3DS_TGACv1_271551_AA0902410.4	NAC-g	-1	#ff00f3	bold	1	0
TRIAE_CS42_3AS_TGACv1_210609_AA0675620.1	NAC-g	-1	#ff00f3	bold	1	0
LOC_Os01g09550.1	NAC-g	-1	#ff00f3	bold	1	0
LOC_Os05g10620.1	NAC-g	-1	#ff00f3	bold	1	0
TRIAE_CS42_3DL_TGACv1_250260_AA0865120.1	NAC-g	-1	#ff00f3	bold	1	0
MLOC_66537.1	NAC-g	-1	#ff00f3	bold	1	0
TRIAE_CS42_3AL_TGACv1_194422_AA0632800.1	NAC-g	-1	#ff00f3	bold	1	0
LOC_Os06g36480.1	NAC-g	-1	#ff00f3	bold	1	0
TRIAE_CS42_7DL_TGACv1_603884_AA1990680.1	NAC-g	-1	#ff00f3	bold	1	0
MLOC_72553.1	NAC-g	-1	#ff00f3	bold	1	0
TRIAE_CS42_7AL_TGACv1_557641_AA1784420.1	NAC-g	-1	#ff00f3	bold	1	0
TRIAE_CS42_7BL_TGACv1_577072_AA1865240.1	NAC-g	-1	#ff00f3	bold	1	0
LOC_Os05g48850.1	NAC-g	-1	#ff00f3	bold	1	0
LOC_Os01g48130.2	NAC-g	-1	#ff00f3	bold	1	0
TRIAE_CS42_3B_TGACv1_221306_AA0736740.1	NAC-g	-1	#ff00f3	bold	1	0
TRIAE_CS42_3DL_TGACv1_249186_AA0840740.4	NAC-g	-1	#ff00f3	bold	1	0
TRIAE_CS42_3AL_TGACv1_195139_AA0645220.1	NAC-g	-1	#ff00f3	bold	1	0
TRIAE_CS42_7DS_TGACv1_625391_AA2065010.1	NAC-g	-1	#ff00f3	bold	1	0
TRIAE_CS42_7AS_TGACv1_570362_AA1834420.2	NAC-g	-1	#ff00f3	bold	1	0
TRIAE_CS42_7BS_TGACv1_594101_AA1956120.1	NAC-g	-1	#ff00f3	bold	1	0
LOC_Os03g12120.1	NAC-g	-1	#ff00f3	bold	1	0
MLOC_50895.1	NAC-g	-1	#ff00f3	bold	1	0
TRIAE_CS42_4BL_TGACv1_320349_AA1036320.1	NAC-g	-1	#ff00f3	bold	1	0
TRIAE_CS42_4DL_TGACv1_343385_AA1133860.6	NAC-g	-1	#ff00f3	bold	1	0
TRIAE_CS42_4AS_TGACv1_307275_AA1019090.2	NAC-g	-1	#ff00f3	bold	1	0
TRIAE_CS42_5BL_TGACv1_404340_AA1296200.1	NAC-g	-1	#ff00f3	bold	1	0
LOC_Os02g38130.1	NAC-g	-1	#ff00f3	bold	1	0
LOC_Os04g40140.1	NAC-g	-1	#ff00f3	bold	1	0
TRIAE_CS42_6AL_TGACv1_470992_AA1500370.1	NAC-g	-1	#ff00f3	bold	1	0
TRIAE_CS42_6DL_TGACv1_527641_AA1706720.1	NAC-g	-1	#ff00f3	bold	1	0
TRIAE_CS42_6BL_TGACv1_500224_AA1601590.1	NAC-g	-1	#ff00f3	bold	1	0
MLOC_11732.1	NAC-g	-1	#ff00f3	bold	1	0
TRIAE_CS42_2DL_TGACv1_160392_AA0550080.1	NAC-g	-1	#ff00f3	bold	1	0
TRIAE_CS42_2AL_TGACv1_096767_AA0321290.4	NAC-g	-1	#ff00f3	bold	1	0
TRIAE_CS42_2BL_TGACv1_131738_AA0431450.2	NAC-g	-1	#ff00f3	bold	1	0
TRIAE_CS42_2BL_TGACv1_130718_AA0416560.1	NAC-g	-1	#ff00f3	bold	1	0
TRIAE_CS42_2AL_TGACv1_094099_AA0292580.1	NAC-g	-1	#ff00f3	bold	1	0
MLOC_21966.2	NAC-g	-1	#ff00f3	bold	1	0
TRIAE_CS42_2DL_TGACv1_159403_AA0537810.1	NAC-g	-1	#ff00f3	bold	1	0
TRIAE_CS42_2BL_TGACv1_130336_AA0409040.1	NAC-g	-1	#ff00f3	bold	1	0
TRIAE_CS42_2AL_TGACv1_094196_AA0294120.2	NAC-g	-1	#ff00f3	bold	1	0
MLOC_43934.1	NAC-g	-1	#ff00f3	bold	1	0
TRIAE_CS42_2DL_TGACv1_159242_AA0535250.1	NAC-g	-1	#ff00f3	bold	1	0
TRIAE_CS42_2AL_TGACv1_094902_AA0304710.2	NAC-g	-1	#ff00f3	bold	1	0
TRIAE_CS42_U_TGACv1_642085_AA2111000.1	NAC-g	-1	#ff00f3	bold	1	0
TRIAE_CS42_2AL_TGACv1_093769_AA0286390.1	NAC-g	-1	#ff00f3	bold	1	0
TRIAE_CS42_4AL_TGACv1_299406_AA1002890.1	NAC-h	-1	#6ea18a	bold	1	0
TRIAE_CS42_5DL_TGACv1_436618_AA1462300.1	NAC-h	-1	#6ea18a	bold	1	0
TRIAE_CS42_5DL_TGACv1_434635_AA1439200.1	NAC-h	-1	#6ea18a	bold	1	0
TRIAE_CS42_5DL_TGACv1_439296_AA1468920.1	NAC-h	-1	#6ea18a	bold	1	0
TRIAE_CS42_5BL_TGACv1_408628_AA1363970.1	NAC-h	-1	#6ea18a	bold	1	0
TRIAE_CS42_4AL_TGACv1_290400_AA0985010.1	NAC-h	-1	#6ea18a	bold	1	0
TRIAE_CS42_2BL_TGACv1_129317_AA0378300.1	NAC-h	-1	#6ea18a	bold	1	0
LOC_Os04g39960.1	NAC-h	-1	#6ea18a	bold	1	0
TRIAE_CS42_2DL_TGACv1_158457_AA0519140.1	NAC-h	-1	#6ea18a	bold	1	0
TRIAE_CS42_2AL_TGACv1_096739_AA0321050.1	NAC-h	-1	#6ea18a	bold	1	0
TRIAE_CS42_2AL_TGACv1_093073_AA0271250.1	NAC-h	-1	#6ea18a	bold	1	0
TRIAE_CS42_2BL_TGACv1_130376_AA0409870.1	NAC-h	-1	#6ea18a	bold	1	0
TRIAE_CS42_2DL_TGACv1_158281_AA0514620.1	NAC-h	-1	#6ea18a	bold	1	0
TRIAE_CS42_2AL_TGACv1_097724_AA0325020.1	NAC-h	-1	#6ea18a	bold	1	0
TRIAE_CS42_2BL_TGACv1_130526_AA0412930.1	NAC-h	-1	#6ea18a	bold	1	0
TRIAE_CS42_2BL_TGACv1_130526_AA0412910.1	NAC-h	-1	#6ea18a	bold	1	0
TRIAE_CS42_2AL_TGACv1_097454_AA0324270.1	NAC-h	-1	#6ea18a	bold	1	0
TRIAE_CS42_2DL_TGACv1_158281_AA0514560.1	NAC-h	-1	#6ea18a	bold	1	0
TRIAE_CS42_2DL_TGACv1_159901_AA0544090.1	NAC-h	-1	#6ea18a	bold	1	0
TRIAE_CS42_2DL_TGACv1_158281_AA0514580.1	NAC-h	-1	#6ea18a	bold	1	0
MLOC_11017.1	NAC-h	-1	#6ea18a	bold	1	0
MLOC_36501.1	NAC-h	-1	#6ea18a	bold	1	0
TRIAE_CS42_2BL_TGACv1_129331_AA0379020.1	NAC-h	-1	#6ea18a	bold	1	0
TRIAE_CS42_2BL_TGACv1_130526_AA0412920.1	NAC-h	-1	#6ea18a	bold	1	0
TRIAE_CS42_2DL_TGACv1_158281_AA0514600.1	NAC-h	-1	#6ea18a	bold	1	0
TRIAE_CS42_2DL_TGACv1_158281_AA0514570.1	NAC-h	-1	#6ea18a	bold	1	0
TRIAE_CS42_2AL_TGACv1_093056_AA0270770.1	NAC-h	-1	#6ea18a	bold	1	0
TRIAE_CS42_7BL_TGACv1_582013_AA1918050.1	NAC-h	-1	#6ea18a	bold	1	0
TRIAE_CS42_4AL_TGACv1_289600_AA0973790.1	NAC-h	-1	#6ea18a	bold	1	0
TRIAE_CS42_5DL_TGACv1_435071_AA1445660.2	NAC-h	-1	#6ea18a	bold	1	0
TRIAE_CS42_7BL_TGACv1_577321_AA1872160.1	NAC-h	-1	#6ea18a	bold	1	0
TRIAE_CS42_4AL_TGACv1_289924_AA0978910.1	NAC-h	-1	#6ea18a	bold	1	0
TRIAE_CS42_5BL_TGACv1_407131_AA1353730.1	NAC-h	-1	#6ea18a	bold	1	0
LOC_Os03g62470.1	NAC-h	-1	#6ea18a	bold	1	0
LOC_Os03g61249.1	NAC-h	-1	#6ea18a	bold	1	0
LOC_Os03g61319.1	NAC-h	-1	#6ea18a	bold	1	0
TRIAE_CS42_U_TGACv1_641464_AA2095820.1	NAC-h	-1	#6ea18a	bold	1	0
TRIAE_CS42_7DS_TGACv1_621882_AA2028520.1	NAC-h	-1	#6ea18a	bold	1	0
TRIAE_CS42_5BL_TGACv1_406841_AA1350390.1	NAC-h	-1	#6ea18a	bold	1	0
LOC_Os07g31410.1	NAC-h	-1	#6ea18a	bold	1	0
LOC_Os03g61650.1	NAC-h	-1	#6ea18a	bold	1	0
TRIAE_CS42_4BS_TGACv1_329104_AA1097830.1	NAC-h	-1	#6ea18a	bold	1	0
TRIAE_CS42_4DS_TGACv1_362919_AA1182750.1	NAC-h	-1	#6ea18a	bold	1	0
LOC_Os09g12380.1	NAC-h	-1	#6ea18a	bold	1	0
TRIAE_CS42_3B_TGACv1_226184_AA0814580.1	NAC-h	-1	#6ea18a	bold	1	0
TRIAE_CS42_3DL_TGACv1_250490_AA0869100.1	NAC-h	-1	#6ea18a	bold	1	0
LOC_Os01g47670.1	NAC-h	-1	#6ea18a	bold	1	0
TRIAE_CS42_3B_TGACv1_221052_AA0728390.1	NAC-h	-1	#6ea18a	bold	1	0
TRIAE_CS42_3DL_TGACv1_249613_AA0852500.1	NAC-h	-1	#6ea18a	bold	1	0
TRIAE_CS42_3AL_TGACv1_196011_AA0656470.1	NAC-h	-1	#6ea18a	bold	1	0
LOC_Os01g48446.1	NAC-h	-1	#6ea18a	bold	1	0
TRIAE_CS42_3B_TGACv1_221188_AA0733380.1	NAC-h	-1	#6ea18a	bold	1	0
MLOC_74840.1	NAC-h	-1	#6ea18a	bold	1	0
TRIAE_CS42_3DL_TGACv1_249294_AA0844470.1	NAC-h	-1	#6ea18a	bold	1	0
TRIAE_CS42_3AL_TGACv1_196147_AA0657630.1	NAC-h	-1	#6ea18a	bold	1	0
TRIAE_CS42_3DL_TGACv1_252366_AA0889570.1	NAC-h	-1	#6ea18a	bold	1	0
TRIAE_CS42_3DL_TGACv1_253556_AA0894940.1	NAC-h	-1	#6ea18a	bold	1	0
TRIAE_CS42_3B_TGACv1_222551_AA0766670.1	NAC-h	-1	#6ea18a	bold	1	0
TRIAE_CS42_3AL_TGACv1_193591_AA0614330.1	NAC-h	-1	#6ea18a	bold	1	0
TRIAE_CS42_3AL_TGACv1_197688_AA0666980.1	NAC-h	-1	#6ea18a	bold	1	0
TRIAE_CS42_3B_TGACv1_226537_AA0817490.1	NAC-h	-1	#6ea18a	bold	1	0
TRIAE_CS42_3B_TGACv1_226537_AA0817500.1	NAC-h	-1	#6ea18a	bold	1	0
TRIAE_CS42_6AS_TGACv1_485568_AA1547750.1	NAC-h	-1	#6ea18a	bold	1	0
TRIAE_CS42_6BS_TGACv1_513898_AA1651650.1	NAC-h	-1	#6ea18a	bold	1	0
TRIAE_CS42_U_TGACv1_643385_AA2131460.1	NAC-h	-1	#6ea18a	bold	1	0
TRIAE_CS42_6AS_TGACv1_485838_AA1552970.1	NAC-h	-1	#6ea18a	bold	1	0
TRIAE_CS42_6AS_TGACv1_487560_AA1571520.2	NAC-h	-1	#6ea18a	bold	1	0
TRIAE_CS42_3B_TGACv1_227158_AA0821770.1	NAC-h	-1	#6ea18a	bold	1	0
TRIAE_CS42_3B_TGACv1_223246_AA0778890.1	NAC-h	-1	#6ea18a	bold	1	0
TRIAE_CS42_3AS_TGACv1_211517_AA0690980.1	NAC-h	-1	#6ea18a	bold	1	0
MLOC_6901.1	NAC-h	-1	#6ea18a	bold	1	0
TRIAE_CS42_1BS_TGACv1_050349_AA0170970.1	NAC-h	-1	#6ea18a	bold	1	0
TRIAE_CS42_1BS_TGACv1_050618_AA0173950.1	NAC-h	-1	#6ea18a	bold	1	0
TRIAE_CS42_1AS_TGACv1_019344_AA0065130.1	NAC-h	-1	#6ea18a	bold	1	0
TRIAE_CS42_1DS_TGACv1_080269_AA0244760.1	NAC-h	-1	#6ea18a	bold	1	0
LOC_Os04g42940.1	NAC-h	-1	#6ea18a	bold	1	0
TRIAE_CS42_2BL_TGACv1_129772_AA0395410.1	NAC-h	-1	#6ea18a	bold	1	0
TRIAE_CS42_2AL_TGACv1_094054_AA0291690.1	NAC-h	-1	#6ea18a	bold	1	0
TRIAE_CS42_2DL_TGACv1_157948_AA0503060.1	NAC-h	-1	#6ea18a	bold	1	0
TRIAE_CS42_3AL_TGACv1_197741_AA0667100.1	NAC-h	-1	#6ea18a	bold	1	0
TRIAE_CS42_2BL_TGACv1_129317_AA0378290.1	NAC-h	-1	#6ea18a	bold	1	0
LOC_Os11g04470.1	NAC-h	-1	#6ea18a	bold	1	0
LOC_Os12g04230.1	NAC-h	-1	#6ea18a	bold	1	0
LOC_Os12g07790.1	NAC-h	-1	#6ea18a	bold	1	0
TRIAE_CS42_7BS_TGACv1_592500_AA1939320.1	NAC-h	-1	#6ea18a	bold	1	0
TRIAE_CS42_7DS_TGACv1_623635_AA2054950.1	NAC-h	-1	#6ea18a	bold	1	0
TRIAE_CS42_4BS_TGACv1_328613_AA1091020.1	NAC-h	-1	#6ea18a	bold	1	0
TRIAE_CS42_4DS_TGACv1_361838_AA1173490.1	NAC-h	-1	#6ea18a	bold	1	0
TRIAE_CS42_4DS_TGACv1_361975_AA1175050.1	NAC-h	-1	#6ea18a	bold	1	0
TRIAE_CS42_4BS_TGACv1_328847_AA1094500.1	NAC-h	-1	#6ea18a	bold	1	0
TRIAE_CS42_4DS_TGACv1_361304_AA1165350.1	NAC-h	-1	#6ea18a	bold	1	0
LOC_Os11g04360.1	NAC-h	-1	#6ea18a	bold	1	0
LOC_Os12g22630.1	NAC-h	-1	#6ea18a	bold	1	0
LOC_Os12g23090.1	NAC-h	-1	#6ea18a	bold	1	0
LOC_Os12g22940.1	NAC-h	-1	#6ea18a	bold	1	0
TRIAE_CS42_7DS_TGACv1_623420_AA2052990.1	NAC-h	-1	#6ea18a	bold	1	0
TRIAE_CS42_7BS_TGACv1_592078_AA1930100.1	NAC-h	-1	#6ea18a	bold	1	0
TRIAE_CS42_7DS_TGACv1_621451_AA2016030.1	NAC-h	-1	#6ea18a	bold	1	0
MLOC_40602.1	NAC-h	-1	#6ea18a	bold	1	0
MLOC_59591.1	NAC-h	-1	#6ea18a	bold	1	0
TRIAE_CS42_7DS_TGACv1_622130_AA2033420.1	NAC-h	-1	#6ea18a	bold	1	0
TRIAE_CS42_7AS_TGACv1_571653_AA1849170.1	NAC-h	-1	#6ea18a	bold	1	0
TRIAE_CS42_6AS_TGACv1_486339_AA1559950.1	NAC-h	-1	#6ea18a	bold	1	0
TRIAE_CS42_7BS_TGACv1_592607_AA1941280.1	NAC-h	-1	#6ea18a	bold	1	0
TRIAE_CS42_7BS_TGACv1_592607_AA1941290.1	NAC-h	-1	#6ea18a	bold	1	0
TRIAE_CS42_7DS_TGACv1_622039_AA2031450.1	NAC-h	-1	#6ea18a	bold	1	0
LOC_Os01g71790.1	NAC-h	-1	#6ea18a	bold	1	0
TRIAE_CS42_3AL_TGACv1_194515_AA0634650.1	NAC-h	-1	#6ea18a	bold	1	0
TRIAE_CS42_3DL_TGACv1_250858_AA0874200.1	NAC-h	-1	#6ea18a	bold	1	0
TRIAE_CS42_3AL_TGACv1_194515_AA0634790.1	NAC-h	-1	#6ea18a	bold	1	0
MLOC_81739.1	NAC-h	-1	#6ea18a	bold	1	0
TRIAE_CS42_3DL_TGACv1_250878_AA0874550.1	NAC-h	-1	#6ea18a	bold	1	0
LOC_Os01g28050.1	NAC-h	-1	#6ea18a	bold	1	0
TRIAE_CS42_3B_TGACv1_224374_AA0795970.1	NAC-h	-1	#6ea18a	bold	1	0
TRIAE_CS42_3DL_TGACv1_251796_AA0885030.1	NAC-h	-1	#6ea18a	bold	1	0
TRIAE_CS42_3B_TGACv1_224374_AA0795940.1	NAC-h	-1	#6ea18a	bold	1	0
TRIAE_CS42_3DL_TGACv1_250858_AA0874220.1	NAC-h	-1	#6ea18a	bold	1	0
TRIAE_CS42_3AL_TGACv1_194515_AA0634660.1	NAC-h	-1	#6ea18a	bold	1	0
TRIAE_CS42_7DS_TGACv1_623904_AA2057290.1	NAC-h	-1	#6ea18a	bold	1	0
TRIAE_CS42_3AS_TGACv1_211816_AA0694580.1	NAC-h	-1	#6ea18a	bold	1	0
MLOC_79696.1	NAC-h	-1	#6ea18a	bold	1	0
TRIAE_CS42_6BL_TGACv1_500895_AA1611420.1	NAC-h	-1	#6ea18a	bold	1	0
TRIAE_CS42_6BL_TGACv1_500895_AA1611410.1	NAC-h	-1	#6ea18a	bold	1	0
TRIAE_CS42_6DL_TGACv1_527790_AA1708620.1	NAC-h	-1	#6ea18a	bold	1	0
TRIAE_CS42_6AL_TGACv1_472224_AA1519450.1	NAC-h	-1	#6ea18a	bold	1	0
TRIAE_CS42_6DL_TGACv1_528829_AA1716410.1	NAC-h	-1	#6ea18a	bold	1	0
TRIAE_CS42_6BL_TGACv1_502078_AA1622880.1	NAC-h	-1	#6ea18a	bold	1	0
LOC_Os11g07700.1	NAC-h	-1	#6ea18a	bold	1	0
TRIAE_CS42_5AS_TGACv1_392783_AA1264600.1	NAC-h	-1	#6ea18a	bold	1	0
TRIAE_CS42_5DS_TGACv1_457805_AA1489940.1	NAC-h	-1	#6ea18a	bold	1	0
TRIAE_CS42_5BS_TGACv1_423508_AA1378340.1	NAC-h	-1	#6ea18a	bold	1	0
TRIAE_CS42_3DL_TGACv1_249859_AA0857540.1	NAC-h	-1	#6ea18a	bold	1	0
TRIAE_CS42_3AL_TGACv1_194533_AA0635200.1	NAC-h	-1	#6ea18a	bold	1	0
LOC_Os08g23880.1	NAC-h	-1	#6ea18a	bold	1	0
LOC_Os02g18460.1	NAC-h	-1	#6ea18a	bold	1	0
LOC_Os02g18470.1	NAC-h	-1	#6ea18a	bold	1	0
TRIAE_CS42_2DS_TGACv1_177468_AA0577950.1	NAC-h	-1	#6ea18a	bold	1	0
LOC_Os07g13920.1	NAC-h	-1	#6ea18a	bold	1	0
LOC_Os05g25960.1	NAC-h	-1	#6ea18a	bold	1	0
LOC_Os05g27749.1	NAC-h	-1	#6ea18a	bold	1	0
LOC_Os05g26026.1	NAC-h	-1	#6ea18a	bold	1	0
LOC_Os05g26049.1	NAC-h	-1	#6ea18a	bold	1	0
LOC_Os07g27330.1	NAC-h	-1	#6ea18a	bold	1	0
LOC_Os07g27340.1	NAC-h	-1	#6ea18a	bold	1	0
LOC_Os03g39100.1	NAC-h	-1	#6ea18a	bold	1	0
LOC_Os03g39050.1	NAC-h	-1	#6ea18a	bold	1	0
LOC_Os07g17180.1	NAC-h	-1	#6ea18a	bold	1	0
LOC_Os07g09740.1	NAC-h	-1	#6ea18a	bold	1	0
LOC_Os07g09830.1	NAC-h	-1	#6ea18a	bold	1	0
LOC_Os07g09860.1	NAC-h	-1	#6ea18a	bold	1	0
