# Supplementary material for: Genome-Wide Sequence and Expression Analysis of the NAC Transcription Factor Family in Polyploid Wheat
Source: G3 (Bethesda). 2017 Jul 11;7(9):3019–29. doi: 10.1534/g3.117.043679 (PMC5592928; doi:10.1534/g3.117.043679)
Supplement: Supplementary file 10 [file 3019TableS7.xlsx]

## Sheet: Sheet1
Table S7. Gene and transcription factor module allocation by WGCNA co-expression analysis.
Gene	Module	TF family	NAC group
TRIAE_CS42_1AL_TGACv1_000008_AA0000170	1	-	-
TRIAE_CS42_1AL_TGACv1_000012_AA0000330	1	-	-
TRIAE_CS42_1AL_TGACv1_000049_AA0001280	1	-	-
TRIAE_CS42_1AL_TGACv1_000056_AA0001810	1	-	-
TRIAE_CS42_1AL_TGACv1_000066_AA0002050	1	-	-
TRIAE_CS42_1AL_TGACv1_000070_AA0002180	1	-	-
TRIAE_CS42_1AL_TGACv1_000072_AA0002350	1	MYB_related	-
TRIAE_CS42_1AL_TGACv1_000072_AA0002360	1	MYB_related	-
TRIAE_CS42_1AL_TGACv1_000072_AA0002370	1	-	-
TRIAE_CS42_1AL_TGACv1_000076_AA0002640	1	-	-
TRIAE_CS42_1AL_TGACv1_000099_AA0003260	1	-	-
TRIAE_CS42_1AL_TGACv1_000103_AA0003380	1	-	-
TRIAE_CS42_1AL_TGACv1_000109_AA0003510	1	-	-
TRIAE_CS42_1AL_TGACv1_000115_AA0003870	1	MYB_related	-
TRIAE_CS42_1AL_TGACv1_000138_AA0004400	1	-	-
TRIAE_CS42_1AL_TGACv1_000138_AA0004410	1	-	-
TRIAE_CS42_1AL_TGACv1_000138_AA0004420	1	-	-
TRIAE_CS42_1AL_TGACv1_000138_AA0004430	1	-	-
TRIAE_CS42_1AL_TGACv1_000138_AA0004450	1	-	-
TRIAE_CS42_1AL_TGACv1_000141_AA0004520	1	-	-
TRIAE_CS42_1AL_TGACv1_000141_AA0004530	1	-	-
TRIAE_CS42_1AL_TGACv1_000142_AA0004590	1	-	-
TRIAE_CS42_1AL_TGACv1_000149_AA0004700	1	-	-
TRIAE_CS42_1AL_TGACv1_000149_AA0004730	1	-	-
TRIAE_CS42_1AL_TGACv1_000149_AA0004760	1	-	-
TRIAE_CS42_1AL_TGACv1_000153_AA0004910	1	-	-
TRIAE_CS42_1AL_TGACv1_000157_AA0005000	1	-	-
TRIAE_CS42_1AL_TGACv1_000160_AA0005070	1	-	-
TRIAE_CS42_1AL_TGACv1_000165_AA0005190	1	-	-
TRIAE_CS42_1AL_TGACv1_000165_AA0005210	1	-	-
TRIAE_CS42_1AL_TGACv1_000167_AA0005240	1	-	-
TRIAE_CS42_1AL_TGACv1_000178_AA0005420	1	-	-
TRIAE_CS42_1AL_TGACv1_000178_AA0005490	1	-	-
TRIAE_CS42_1AL_TGACv1_000192_AA0005780	1	-	-
TRIAE_CS42_1AL_TGACv1_000208_AA0006160	1	-	-
TRIAE_CS42_1AL_TGACv1_000219_AA0006480	1	-	-
TRIAE_CS42_1AL_TGACv1_000222_AA0006610	1	-	-
TRIAE_CS42_1AL_TGACv1_000232_AA0006790	1	-	-
TRIAE_CS42_1AL_TGACv1_000242_AA0007010	1	-	-
TRIAE_CS42_1AL_TGACv1_000245_AA0007110	1	-	-
TRIAE_CS42_1AL_TGACv1_000245_AA0007130	1	-	-
TRIAE_CS42_1AL_TGACv1_000246_AA0007180	1	-	-
TRIAE_CS42_1AL_TGACv1_000246_AA0007210	1	-	-
TRIAE_CS42_1AL_TGACv1_000249_AA0007270	1	WRKY	-
TRIAE_CS42_1AL_TGACv1_000249_AA0007290	1	-	-
TRIAE_CS42_1AL_TGACv1_000254_AA0007360	1	bHLH	-
TRIAE_CS42_1AL_TGACv1_000284_AA0008040	1	-	-
TRIAE_CS42_1AL_TGACv1_000303_AA0008380	1	-	-
TRIAE_CS42_1AL_TGACv1_000304_AA0008400	1	-	-
TRIAE_CS42_1AL_TGACv1_000318_AA0008570	1	-	-
TRIAE_CS42_1AL_TGACv1_000327_AA0008940	1	-	-
TRIAE_CS42_1AL_TGACv1_000329_AA0009080	1	-	-
TRIAE_CS42_1AL_TGACv1_000333_AA0009290	1	-	-
TRIAE_CS42_1AL_TGACv1_000351_AA0009690	1	-	-
TRIAE_CS42_1AL_TGACv1_000359_AA0009880	1	-	-
TRIAE_CS42_1AL_TGACv1_000362_AA0010120	1	-	-
TRIAE_CS42_1AL_TGACv1_000364_AA0010210	1	-	-
TRIAE_CS42_1AL_TGACv1_000369_AA0010430	1	-	-
TRIAE_CS42_1AL_TGACv1_000371_AA0010490	1	-	-
TRIAE_CS42_1AL_TGACv1_000398_AA0011100	1	-	-
TRIAE_CS42_1AL_TGACv1_000398_AA0011110	1	-	-
TRIAE_CS42_1AL_TGACv1_000398_AA0011150	1	-	-
TRIAE_CS42_1AL_TGACv1_000405_AA0011270	1	-	-
TRIAE_CS42_1AL_TGACv1_000405_AA0011280	1	WRKY	-
TRIAE_CS42_1AL_TGACv1_000412_AA0011510	1	-	-
TRIAE_CS42_1AL_TGACv1_000434_AA0012070	1	-	-
TRIAE_CS42_1AL_TGACv1_000439_AA0012150	1	-	-
TRIAE_CS42_1AL_TGACv1_000454_AA0012410	1	-	-
TRIAE_CS42_1AL_TGACv1_000457_AA0012550	1	-	-
TRIAE_CS42_1AL_TGACv1_000457_AA0012560	1	-	-
TRIAE_CS42_1AL_TGACv1_000458_AA0012590	1	-	-
TRIAE_CS42_1AL_TGACv1_000462_AA0012630	1	-	-
TRIAE_CS42_1AL_TGACv1_000467_AA0012790	1	-	-
TRIAE_CS42_1AL_TGACv1_000473_AA0012980	1	-	-
TRIAE_CS42_1AL_TGACv1_000482_AA0013200	1	-	-
TRIAE_CS42_1AL_TGACv1_000490_AA0013370	1	-	-
TRIAE_CS42_1AL_TGACv1_000504_AA0013540	1	-	-
TRIAE_CS42_1AL_TGACv1_000505_AA0013560	1	-	-
TRIAE_CS42_1AL_TGACv1_000516_AA0013770	1	-	-
TRIAE_CS42_1AL_TGACv1_000524_AA0013920	1	-	-
TRIAE_CS42_1AL_TGACv1_000533_AA0014140	1	-	-
TRIAE_CS42_1AL_TGACv1_000548_AA0014410	1	-	-
TRIAE_CS42_1AL_TGACv1_000549_AA0014490	1	-	-
TRIAE_CS42_1AL_TGACv1_000555_AA0014640	1	NAC	NAC-b
TRIAE_CS42_1AL_TGACv1_000567_AA0014810	1	-	-
TRIAE_CS42_1AL_TGACv1_000567_AA0014820	1	-	-
TRIAE_CS42_1AL_TGACv1_000583_AA0015220	1	-	-
TRIAE_CS42_1AL_TGACv1_000583_AA0015230	1	-	-
TRIAE_CS42_1AL_TGACv1_000597_AA0015430	1	-	-
TRIAE_CS42_1AL_TGACv1_000597_AA0015440	1	-	-
TRIAE_CS42_1AL_TGACv1_000609_AA0015630	1	-	-
TRIAE_CS42_1AL_TGACv1_000627_AA0016190	1	-	-
TRIAE_CS42_1AL_TGACv1_000627_AA0016200	1	-	-
TRIAE_CS42_1AL_TGACv1_000627_AA0016210	1	-	-
TRIAE_CS42_1AL_TGACv1_000661_AA0016590	1	G2-like	-
TRIAE_CS42_1AL_TGACv1_000669_AA0016760	1	GRAS	-
TRIAE_CS42_1AL_TGACv1_000696_AA0017200	1	-	-
TRIAE_CS42_1AL_TGACv1_000696_AA0017270	1	-	-
TRIAE_CS42_1AL_TGACv1_000696_AA0017290	1	-	-
TRIAE_CS42_1AL_TGACv1_000725_AA0017960	1	-	-
TRIAE_CS42_1AL_TGACv1_000725_AA0017970	1	-	-
TRIAE_CS42_1AL_TGACv1_000725_AA0017980	1	-	-
TRIAE_CS42_1AL_TGACv1_000750_AA0018310	1	-	-
TRIAE_CS42_1AL_TGACv1_000750_AA0018320	1	-	-
TRIAE_CS42_1AL_TGACv1_000756_AA0018520	1	-	-
TRIAE_CS42_1AL_TGACv1_000772_AA0018880	1	MYB	-
TRIAE_CS42_1AL_TGACv1_000775_AA0018930	1	-	-
TRIAE_CS42_1AL_TGACv1_000794_AA0019250	1	-	-
TRIAE_CS42_1AL_TGACv1_000799_AA0019360	1	-	-
TRIAE_CS42_1AL_TGACv1_000808_AA0019470	1	-	-
TRIAE_CS42_1AL_TGACv1_000810_AA0019510	1	-	-
TRIAE_CS42_1AL_TGACv1_000812_AA0019570	1	-	-
TRIAE_CS42_1AL_TGACv1_000815_AA0019680	1	-	-
TRIAE_CS42_1AL_TGACv1_000825_AA0019830	1	-	-
TRIAE_CS42_1AL_TGACv1_000853_AA0020390	1	-	-
TRIAE_CS42_1AL_TGACv1_000872_AA0020740	1	-	-
TRIAE_CS42_1AL_TGACv1_000879_AA0020910	1	-	-
TRIAE_CS42_1AL_TGACv1_000879_AA0020920	1	-	-
TRIAE_CS42_1AL_TGACv1_000880_AA0020950	1	-	-
TRIAE_CS42_1AL_TGACv1_000885_AA0021070	1	-	-
TRIAE_CS42_1AL_TGACv1_000888_AA0021140	1	-	-
TRIAE_CS42_1AL_TGACv1_000890_AA0021220	1	-	-
TRIAE_CS42_1AL_TGACv1_000893_AA0021300	1	-	-
TRIAE_CS42_1AL_TGACv1_000906_AA0021550	1	-	-
TRIAE_CS42_1AL_TGACv1_000912_AA0021710	1	-	-
TRIAE_CS42_1AL_TGACv1_000915_AA0021780	1	-	-
TRIAE_CS42_1AL_TGACv1_000922_AA0021960	1	-	-
TRIAE_CS42_1AL_TGACv1_000929_AA0022050	1	-	-
TRIAE_CS42_1AL_TGACv1_000931_AA0022100	1	-	-
TRIAE_CS42_1AL_TGACv1_000964_AA0022780	1	-	-
TRIAE_CS42_1AL_TGACv1_000964_AA0022790	1	-	-
TRIAE_CS42_1AL_TGACv1_000984_AA0023130	1	-	-
TRIAE_CS42_1AL_TGACv1_001016_AA0023570	1	-	-
TRIAE_CS42_1AL_TGACv1_001031_AA0023780	1	-	-
TRIAE_CS42_1AL_TGACv1_001038_AA0023930	1	-	-
TRIAE_CS42_1AL_TGACv1_001060_AA0024150	1	-	-
TRIAE_CS42_1AL_TGACv1_001060_AA0024180	1	-	-
TRIAE_CS42_1AL_TGACv1_001063_AA0024230	1	-	-
TRIAE_CS42_1AL_TGACv1_001063_AA0024240	1	-	-
TRIAE_CS42_1AL_TGACv1_001075_AA0024550	1	-	-
TRIAE_CS42_1AL_TGACv1_001102_AA0025010	1	-	-
TRIAE_CS42_1AL_TGACv1_001102_AA0025030	1	-	-
TRIAE_CS42_1AL_TGACv1_001103_AA0025080	1	-	-
TRIAE_CS42_1AL_TGACv1_001109_AA0025290	1	-	-
TRIAE_CS42_1AL_TGACv1_001123_AA0025430	1	-	-
TRIAE_CS42_1AL_TGACv1_001127_AA0025460	1	-	-
TRIAE_CS42_1AL_TGACv1_001129_AA0025500	1	-	-
TRIAE_CS42_1AL_TGACv1_001129_AA0025510	1	-	-
TRIAE_CS42_1AL_TGACv1_001133_AA0025590	1	-	-
TRIAE_CS42_1AL_TGACv1_001135_AA0025630	1	-	-
TRIAE_CS42_1AL_TGACv1_001137_AA0025710	1	-	-
TRIAE_CS42_1AL_TGACv1_001138_AA0025730	1	-	-
TRIAE_CS42_1AL_TGACv1_001143_AA0025830	1	-	-
TRIAE_CS42_1AL_TGACv1_001153_AA0026130	1	-	-
TRIAE_CS42_1AL_TGACv1_001153_AA0026180	1	-	-
TRIAE_CS42_1AL_TGACv1_001169_AA0026430	1	-	-
TRIAE_CS42_1AL_TGACv1_001173_AA0026510	1	-	-
TRIAE_CS42_1AL_TGACv1_001183_AA0026630	1	HSF	-
TRIAE_CS42_1AL_TGACv1_001188_AA0026720	1	-	-
TRIAE_CS42_1AL_TGACv1_001191_AA0026770	1	-	-
TRIAE_CS42_1AL_TGACv1_001208_AA0026970	1	-	-
TRIAE_CS42_1AL_TGACv1_001214_AA0027040	1	-	-
TRIAE_CS42_1AL_TGACv1_001221_AA0027180	1	-	-
TRIAE_CS42_1AL_TGACv1_001230_AA0027380	1	-	-
TRIAE_CS42_1AL_TGACv1_001233_AA0027560	1	-	-
TRIAE_CS42_1AL_TGACv1_001234_AA0027640	1	-	-
TRIAE_CS42_1AL_TGACv1_001252_AA0027800	1	-	-
TRIAE_CS42_1AL_TGACv1_001255_AA0027830	1	-	-
TRIAE_CS42_1AL_TGACv1_001256_AA0027860	1	-	-
TRIAE_CS42_1AL_TGACv1_001256_AA0027880	1	-	-
TRIAE_CS42_1AL_TGACv1_001261_AA0027950	1	-	-
TRIAE_CS42_1AL_TGACv1_001286_AA0028250	1	-	-
TRIAE_CS42_1AL_TGACv1_001316_AA0028580	1	-	-
TRIAE_CS42_1AL_TGACv1_001337_AA0028910	1	-	-
TRIAE_CS42_1AL_TGACv1_001353_AA0029190	1	SBP	-
TRIAE_CS42_1AL_TGACv1_001373_AA0029470	1	bZIP	-
TRIAE_CS42_1AL_TGACv1_001391_AA0029930	1	-	-
TRIAE_CS42_1AL_TGACv1_001436_AA0030510	1	-	-
TRIAE_CS42_1AL_TGACv1_001450_AA0030750	1	-	-
TRIAE_CS42_1AL_TGACv1_001462_AA0030900	1	-	-
TRIAE_CS42_1AL_TGACv1_001462_AA0030910	1	-	-
TRIAE_CS42_1AL_TGACv1_001462_AA0030940	1	-	-
TRIAE_CS42_1AL_TGACv1_001490_AA0031250	1	-	-
TRIAE_CS42_1AL_TGACv1_001501_AA0031460	1	-	-
TRIAE_CS42_1AL_TGACv1_001502_AA0031480	1	GRAS	-
TRIAE_CS42_1AL_TGACv1_001510_AA0031540	1	-	-
TRIAE_CS42_1AL_TGACv1_001526_AA0031740	1	NF-YC	-
TRIAE_CS42_1AL_TGACv1_001534_AA0031810	1	-	-
TRIAE_CS42_1AL_TGACv1_001534_AA0031850	1	-	-
TRIAE_CS42_1AL_TGACv1_001541_AA0031970	1	-	-
TRIAE_CS42_1AL_TGACv1_001562_AA0032310	1	-	-
TRIAE_CS42_1AL_TGACv1_001586_AA0032530	1	-	-
TRIAE_CS42_1AL_TGACv1_001586_AA0032540	1	-	-
TRIAE_CS42_1AL_TGACv1_001595_AA0032640	1	-	-
TRIAE_CS42_1AL_TGACv1_001595_AA0032650	1	-	-
TRIAE_CS42_1AL_TGACv1_001599_AA0032740	1	-	-
TRIAE_CS42_1AL_TGACv1_001604_AA0032830	1	-	-
TRIAE_CS42_1AL_TGACv1_001606_AA0032860	1	-	-
TRIAE_CS42_1AL_TGACv1_001628_AA0033160	1	-	-
TRIAE_CS42_1AL_TGACv1_001636_AA0033260	1	-	-
TRIAE_CS42_1AL_TGACv1_001642_AA0033350	1	-	-
TRIAE_CS42_1AL_TGACv1_001649_AA0033470	1	-	-
TRIAE_CS42_1AL_TGACv1_001649_AA0033490	1	-	-
TRIAE_CS42_1AL_TGACv1_001652_AA0033600	1	-	-
TRIAE_CS42_1AL_TGACv1_001661_AA0033730	1	-	-
TRIAE_CS42_1AL_TGACv1_001664_AA0033750	1	-	-
TRIAE_CS42_1AL_TGACv1_001690_AA0034060	1	-	-
TRIAE_CS42_1AL_TGACv1_001713_AA0034210	1	-	-
TRIAE_CS42_1AL_TGACv1_001738_AA0034430	1	-	-
TRIAE_CS42_1AL_TGACv1_001774_AA0034980	1	-	-
TRIAE_CS42_1AL_TGACv1_001781_AA0035100	1	-	-
TRIAE_CS42_1AL_TGACv1_001782_AA0035150	1	-	-
TRIAE_CS42_1AL_TGACv1_001782_AA0035170	1	-	-
TRIAE_CS42_1AL_TGACv1_001805_AA0035400	1	-	-
TRIAE_CS42_1AL_TGACv1_001811_AA0035470	1	-	-
TRIAE_CS42_1AL_TGACv1_001818_AA0035580	1	MYB_related	-
TRIAE_CS42_1AL_TGACv1_001821_AA0035610	1	-	-
TRIAE_CS42_1AL_TGACv1_001864_AA0036040	1	-	-
TRIAE_CS42_1AL_TGACv1_001868_AA0036080	1	-	-
TRIAE_CS42_1AL_TGACv1_001886_AA0036270	1	-	-
TRIAE_CS42_1AL_TGACv1_001900_AA0036420	1	-	-
TRIAE_CS42_1AL_TGACv1_001900_AA0036430	1	-	-
TRIAE_CS42_1AL_TGACv1_001922_AA0036790	1	-	-
TRIAE_CS42_1AL_TGACv1_001928_AA0036910	1	-	-
TRIAE_CS42_1AL_TGACv1_001960_AA0037230	1	-	-
TRIAE_CS42_1AL_TGACv1_001964_AA0037280	1	-	-
TRIAE_CS42_1AL_TGACv1_001965_AA0037300	1	-	-
TRIAE_CS42_1AL_TGACv1_001980_AA0037390	1	-	-
TRIAE_CS42_1AL_TGACv1_001992_AA0037540	1	-	-
TRIAE_CS42_1AL_TGACv1_002014_AA0037850	1	-	-
TRIAE_CS42_1AL_TGACv1_002026_AA0037970	1	-	-
TRIAE_CS42_1AL_TGACv1_002038_AA0038050	1	-	-
TRIAE_CS42_1AL_TGACv1_002051_AA0038150	1	WRKY	-
TRIAE_CS42_1AL_TGACv1_002060_AA0038240	1	bHLH	-
TRIAE_CS42_1AL_TGACv1_002075_AA0038500	1	-	-
TRIAE_CS42_1AL_TGACv1_002075_AA0038510	1	-	-
TRIAE_CS42_1AL_TGACv1_002087_AA0038580	1	-	-
TRIAE_CS42_1AL_TGACv1_002091_AA0038680	1	-	-
TRIAE_CS42_1AL_TGACv1_002098_AA0038720	1	-	-
TRIAE_CS42_1AL_TGACv1_002129_AA0038920	1	-	-
TRIAE_CS42_1AL_TGACv1_002147_AA0039120	1	-	-
TRIAE_CS42_1AL_TGACv1_002159_AA0039240	1	-	-
TRIAE_CS42_1AL_TGACv1_002171_AA0039400	1	-	-
TRIAE_CS42_1AL_TGACv1_002171_AA0039410	1	-	-
TRIAE_CS42_1AL_TGACv1_002242_AA0039980	1	-	-
TRIAE_CS42_1AL_TGACv1_002272_AA0040320	1	-	-
TRIAE_CS42_1AL_TGACv1_002286_AA0040500	1	-	-
TRIAE_CS42_1AL_TGACv1_002287_AA0040540	1	-	-
TRIAE_CS42_1AL_TGACv1_002333_AA0040950	1	-	-
TRIAE_CS42_1AL_TGACv1_002349_AA0041090	1	-	-
TRIAE_CS42_1AL_TGACv1_002358_AA0041150	1	-	-
TRIAE_CS42_1AL_TGACv1_002368_AA0041300	1	-	-
TRIAE_CS42_1AL_TGACv1_002391_AA0041510	1	-	-
TRIAE_CS42_1AL_TGACv1_002406_AA0041610	1	-	-
TRIAE_CS42_1AL_TGACv1_002444_AA0042030	1	-	-
TRIAE_CS42_1AL_TGACv1_002449_AA0042080	1	-	-
TRIAE_CS42_1AL_TGACv1_002471_AA0042220	1	-	-
TRIAE_CS42_1AL_TGACv1_002506_AA0042540	1	-	-
TRIAE_CS42_1AL_TGACv1_002510_AA0042560	1	-	-
TRIAE_CS42_1AL_TGACv1_002510_AA0042580	1	-	-
TRIAE_CS42_1AL_TGACv1_002514_AA0042630	1	-	-
TRIAE_CS42_1AL_TGACv1_002519_AA0042690	1	-	-
TRIAE_CS42_1AL_TGACv1_002522_AA0042790	1	-	-
TRIAE_CS42_1AL_TGACv1_002522_AA0042800	1	-	-
TRIAE_CS42_1AL_TGACv1_002573_AA0043250	1	-	-
TRIAE_CS42_1AL_TGACv1_002583_AA0043330	1	-	-
TRIAE_CS42_1AL_TGACv1_002610_AA0043600	1	-	-
TRIAE_CS42_1AL_TGACv1_002630_AA0043970	1	NAC	NAC-e
TRIAE_CS42_1AL_TGACv1_002646_AA0044230	1	-	-
TRIAE_CS42_1AL_TGACv1_002723_AA0044730	1	-	-
TRIAE_CS42_1AL_TGACv1_002725_AA0044760	1	WRKY	-
TRIAE_CS42_1AL_TGACv1_002758_AA0044930	1	-	-
TRIAE_CS42_1AL_TGACv1_002760_AA0044990	1	-	-
TRIAE_CS42_1AL_TGACv1_002809_AA0045270	1	-	-
TRIAE_CS42_1AL_TGACv1_002863_AA0045640	1	RAV	-
TRIAE_CS42_1AL_TGACv1_002870_AA0045710	1	-	-
TRIAE_CS42_1AL_TGACv1_002880_AA0045830	1	-	-
TRIAE_CS42_1AL_TGACv1_002892_AA0045950	1	-	-
TRIAE_CS42_1AL_TGACv1_002903_AA0046120	1	-	-
TRIAE_CS42_1AL_TGACv1_002903_AA0046130	1	-	-
TRIAE_CS42_1AL_TGACv1_002908_AA0046230	1	-	-
TRIAE_CS42_1AL_TGACv1_002908_AA0046240	1	-	-
TRIAE_CS42_1AL_TGACv1_002955_AA0046720	1	-	-
TRIAE_CS42_1AL_TGACv1_002988_AA0046960	1	-	-
TRIAE_CS42_1AL_TGACv1_003008_AA0047110	1	-	-
TRIAE_CS42_1AL_TGACv1_003018_AA0047150	1	-	-
TRIAE_CS42_1AL_TGACv1_003067_AA0047410	1	-	-
TRIAE_CS42_1AL_TGACv1_003073_AA0047450	1	-	-
TRIAE_CS42_1AL_TGACv1_003078_AA0047570	1	-	-
TRIAE_CS42_1AL_TGACv1_003109_AA0047790	1	-	-
TRIAE_CS42_1AL_TGACv1_003114_AA0047820	1	-	-
TRIAE_CS42_1AL_TGACv1_003121_AA0047940	1	-	-
TRIAE_CS42_1AL_TGACv1_003123_AA0047970	1	-	-
TRIAE_CS42_1AL_TGACv1_003139_AA0048110	1	-	-
TRIAE_CS42_1AL_TGACv1_003142_AA0048150	1	-	-
TRIAE_CS42_1AL_TGACv1_003147_AA0048230	1	-	-
TRIAE_CS42_1AL_TGACv1_003148_AA0048240	1	-	-
TRIAE_CS42_1AL_TGACv1_003148_AA0048280	1	-	-
TRIAE_CS42_1AL_TGACv1_003156_AA0048350	1	-	-
TRIAE_CS42_1AL_TGACv1_003210_AA0048710	1	-	-
TRIAE_CS42_1AL_TGACv1_003292_AA0049120	1	-	-
TRIAE_CS42_1AL_TGACv1_003325_AA0049220	1	-	-
TRIAE_CS42_1AL_TGACv1_003346_AA0049260	1	-	-
TRIAE_CS42_1AL_TGACv1_003384_AA0049460	1	-	-
TRIAE_CS42_1AL_TGACv1_003433_AA0049730	1	-	-
TRIAE_CS42_1AL_TGACv1_003565_AA0050400	1	-	-
TRIAE_CS42_1AL_TGACv1_003575_AA0050450	1	-	-
TRIAE_CS42_1AL_TGACv1_003595_AA0050590	1	-	-
TRIAE_CS42_1AL_TGACv1_003638_AA0050840	1	-	-
TRIAE_CS42_1AL_TGACv1_003666_AA0050980	1	-	-
TRIAE_CS42_1AL_TGACv1_003702_AA0051120	1	-	-
TRIAE_CS42_1AL_TGACv1_003718_AA0051180	1	-	-
TRIAE_CS42_1AL_TGACv1_003726_AA0051200	1	-	-
TRIAE_CS42_1AL_TGACv1_003726_AA0051220	1	-	-
TRIAE_CS42_1AL_TGACv1_003747_AA0051340	1	-	-
TRIAE_CS42_1AL_TGACv1_003757_AA0051410	1	-	-
TRIAE_CS42_1AL_TGACv1_003785_AA0051500	1	-	-
TRIAE_CS42_1AL_TGACv1_003838_AA0051670	1	-	-
TRIAE_CS42_1AL_TGACv1_003859_AA0051790	1	-	-
TRIAE_CS42_1AL_TGACv1_003960_AA0052040	1	-	-
TRIAE_CS42_1AL_TGACv1_004099_AA0052440	1	-	-
TRIAE_CS42_1AL_TGACv1_004133_AA0052530	1	-	-
TRIAE_CS42_1AL_TGACv1_004134_AA0052540	1	-	-
TRIAE_CS42_1AL_TGACv1_004186_AA0052710	1	-	-
TRIAE_CS42_1AL_TGACv1_004186_AA0052720	1	-	-
TRIAE_CS42_1AL_TGACv1_004219_AA0052810	1	-	-
TRIAE_CS42_1AL_TGACv1_004277_AA0053020	1	-	-
TRIAE_CS42_1AL_TGACv1_004279_AA0053040	1	-	-
TRIAE_CS42_1AL_TGACv1_004284_AA0053050	1	-	-
TRIAE_CS42_1AL_TGACv1_004446_AA0053550	1	-	-
TRIAE_CS42_1AL_TGACv1_004538_AA0053790	1	-	-
TRIAE_CS42_1AL_TGACv1_004824_AA0054220	1	-	-
TRIAE_CS42_1AL_TGACv1_004838_AA0054240	1	-	-
TRIAE_CS42_1AL_TGACv1_005077_AA0054540	1	-	-
TRIAE_CS42_1AL_TGACv1_005100_AA0054560	1	-	-
TRIAE_CS42_1AL_TGACv1_005401_AA0054770	1	-	-
TRIAE_CS42_1AL_TGACv1_005681_AA0054950	1	-	-
TRIAE_CS42_1AL_TGACv1_726018_AA2170150	1	-	-
TRIAE_CS42_1AS_TGACv1_018973_AA0057160	1	-	-
TRIAE_CS42_1AS_TGACv1_018984_AA0057300	1	-	-
TRIAE_CS42_1AS_TGACv1_018991_AA0057370	1	-	-
TRIAE_CS42_1AS_TGACv1_019035_AA0058480	1	-	-
TRIAE_CS42_1AS_TGACv1_019036_AA0058530	1	-	-
TRIAE_CS42_1AS_TGACv1_019041_AA0058690	1	-	-
TRIAE_CS42_1AS_TGACv1_019066_AA0059530	1	-	-
TRIAE_CS42_1AS_TGACv1_019069_AA0059690	1	-	-
TRIAE_CS42_1AS_TGACv1_019089_AA0060420	1	-	-
TRIAE_CS42_1AS_TGACv1_019091_AA0060460	1	-	-
TRIAE_CS42_1AS_TGACv1_019096_AA0060570	1	-	-
TRIAE_CS42_1AS_TGACv1_019101_AA0060630	1	-	-
TRIAE_CS42_1AS_TGACv1_019111_AA0060780	1	-	-
TRIAE_CS42_1AS_TGACv1_019118_AA0060900	1	-	-
TRIAE_CS42_1AS_TGACv1_019137_AA0061430	1	-	-
TRIAE_CS42_1AS_TGACv1_019137_AA0061440	1	-	-
TRIAE_CS42_1AS_TGACv1_019137_AA0061460	1	-	-
TRIAE_CS42_1AS_TGACv1_019138_AA0061480	1	-	-
TRIAE_CS42_1AS_TGACv1_019154_AA0061750	1	-	-
TRIAE_CS42_1AS_TGACv1_019159_AA0061810	1	-	-
TRIAE_CS42_1AS_TGACv1_019182_AA0062450	1	-	-
TRIAE_CS42_1AS_TGACv1_019193_AA0062730	1	-	-
TRIAE_CS42_1AS_TGACv1_019203_AA0063050	1	-	-
TRIAE_CS42_1AS_TGACv1_019203_AA0063090	1	-	-
TRIAE_CS42_1AS_TGACv1_019203_AA0063100	1	-	-
TRIAE_CS42_1AS_TGACv1_019203_AA0063110	1	-	-
TRIAE_CS42_1AS_TGACv1_019215_AA0063260	1	-	-
TRIAE_CS42_1AS_TGACv1_019234_AA0063620	1	-	-
TRIAE_CS42_1AS_TGACv1_019239_AA0063780	1	-	-
TRIAE_CS42_1AS_TGACv1_019249_AA0063940	1	-	-
TRIAE_CS42_1AS_TGACv1_019249_AA0063950	1	-	-
TRIAE_CS42_1AS_TGACv1_019249_AA0063960	1	-	-
TRIAE_CS42_1AS_TGACv1_019288_AA0064390	1	-	-
TRIAE_CS42_1AS_TGACv1_019292_AA0064450	1	-	-
TRIAE_CS42_1AS_TGACv1_019317_AA0064830	1	-	-
TRIAE_CS42_1AS_TGACv1_019319_AA0064890	1	-	-
TRIAE_CS42_1AS_TGACv1_019355_AA0065450	1	-	-
TRIAE_CS42_1AS_TGACv1_019361_AA0065590	1	-	-
TRIAE_CS42_1AS_TGACv1_019415_AA0066320	1	-	-
TRIAE_CS42_1AS_TGACv1_019415_AA0066330	1	-	-
TRIAE_CS42_1AS_TGACv1_019494_AA0067320	1	-	-
TRIAE_CS42_1AS_TGACv1_019496_AA0067360	1	-	-
TRIAE_CS42_1AS_TGACv1_019501_AA0067410	1	-	-
TRIAE_CS42_1AS_TGACv1_019503_AA0067420	1	-	-
TRIAE_CS42_1AS_TGACv1_019520_AA0067600	1	-	-
TRIAE_CS42_1AS_TGACv1_019548_AA0067950	1	-	-
TRIAE_CS42_1AS_TGACv1_019551_AA0068040	1	-	-
TRIAE_CS42_1AS_TGACv1_019562_AA0068310	1	-	-
TRIAE_CS42_1AS_TGACv1_019564_AA0068390	1	-	-
TRIAE_CS42_1AS_TGACv1_019565_AA0068460	1	-	-
TRIAE_CS42_1AS_TGACv1_019565_AA0068470	1	-	-
TRIAE_CS42_1AS_TGACv1_019570_AA0068550	1	WRKY	-
TRIAE_CS42_1AS_TGACv1_019597_AA0068860	1	-	-
TRIAE_CS42_1AS_TGACv1_019662_AA0069710	1	-	-
TRIAE_CS42_1AS_TGACv1_019676_AA0069770	1	-	-
TRIAE_CS42_1AS_TGACv1_019685_AA0069860	1	-	-
TRIAE_CS42_1AS_TGACv1_019686_AA0069900	1	-	-
TRIAE_CS42_1AS_TGACv1_019696_AA0070120	1	-	-
TRIAE_CS42_1AS_TGACv1_019730_AA0070710	1	-	-
TRIAE_CS42_1AS_TGACv1_019763_AA0071160	1	-	-
TRIAE_CS42_1AS_TGACv1_019763_AA0071170	1	-	-
TRIAE_CS42_1AS_TGACv1_019833_AA0071870	1	-	-
TRIAE_CS42_1AS_TGACv1_019880_AA0072370	1	-	-
TRIAE_CS42_1AS_TGACv1_019894_AA0072590	1	bHLH	-
TRIAE_CS42_1AS_TGACv1_019922_AA0072860	1	-	-
TRIAE_CS42_1AS_TGACv1_019945_AA0073150	1	-	-
TRIAE_CS42_1AS_TGACv1_019979_AA0073490	1	-	-
TRIAE_CS42_1AS_TGACv1_020007_AA0073780	1	-	-
TRIAE_CS42_1AS_TGACv1_020010_AA0073840	1	-	-
TRIAE_CS42_1AS_TGACv1_020024_AA0074000	1	-	-
TRIAE_CS42_1AS_TGACv1_020114_AA0074820	1	-	-
TRIAE_CS42_1AS_TGACv1_020128_AA0074940	1	-	-
TRIAE_CS42_1AS_TGACv1_020151_AA0075210	1	-	-
TRIAE_CS42_1AS_TGACv1_020205_AA0075610	1	-	-
TRIAE_CS42_1AS_TGACv1_020217_AA0075760	1	-	-
TRIAE_CS42_1AS_TGACv1_020234_AA0075880	1	-	-
TRIAE_CS42_1AS_TGACv1_020251_AA0075990	1	-	-
TRIAE_CS42_1AS_TGACv1_020275_AA0076220	1	-	-
TRIAE_CS42_1AS_TGACv1_020318_AA0076580	1	-	-
TRIAE_CS42_1AS_TGACv1_020318_AA0076630	1	-	-
TRIAE_CS42_1AS_TGACv1_020330_AA0076690	1	-	-
TRIAE_CS42_1AS_TGACv1_020330_AA0076700	1	-	-
TRIAE_CS42_1AS_TGACv1_020330_AA0076710	1	-	-
TRIAE_CS42_1AS_TGACv1_020356_AA0076880	1	-	-
TRIAE_CS42_1AS_TGACv1_020365_AA0077030	1	-	-
TRIAE_CS42_1AS_TGACv1_020393_AA0077160	1	-	-
TRIAE_CS42_1AS_TGACv1_020422_AA0077450	1	-	-
TRIAE_CS42_1AS_TGACv1_020459_AA0077630	1	-	-
TRIAE_CS42_1AS_TGACv1_020470_AA0077680	1	-	-
TRIAE_CS42_1AS_TGACv1_020508_AA0077890	1	-	-
TRIAE_CS42_1AS_TGACv1_020584_AA0078570	1	-	-
TRIAE_CS42_1AS_TGACv1_020726_AA0079570	1	-	-
TRIAE_CS42_1AS_TGACv1_020744_AA0079730	1	-	-
TRIAE_CS42_1AS_TGACv1_020885_AA0080310	1	-	-
TRIAE_CS42_1AS_TGACv1_020985_AA0080620	1	-	-
TRIAE_CS42_1AS_TGACv1_021050_AA0080820	1	-	-
TRIAE_CS42_1AS_TGACv1_021060_AA0080840	1	-	-
TRIAE_CS42_1AS_TGACv1_021456_AA0081750	1	-	-
TRIAE_CS42_1AS_TGACv1_021532_AA0081820	1	-	-
TRIAE_CS42_1AS_TGACv1_022319_AA0082420	1	-	-
TRIAE_CS42_1BL_TGACv1_030243_AA0083380	1	-	-
TRIAE_CS42_1BL_TGACv1_030252_AA0083920	1	-	-
TRIAE_CS42_1BL_TGACv1_030256_AA0084090	1	-	-
TRIAE_CS42_1BL_TGACv1_030256_AA0084140	1	-	-
TRIAE_CS42_1BL_TGACv1_030260_AA0084260	1	-	-
TRIAE_CS42_1BL_TGACv1_030274_AA0084790	1	-	-
TRIAE_CS42_1BL_TGACv1_030275_AA0084840	1	-	-
TRIAE_CS42_1BL_TGACv1_030281_AA0085130	1	-	-
TRIAE_CS42_1BL_TGACv1_030284_AA0085360	1	-	-
TRIAE_CS42_1BL_TGACv1_030288_AA0085490	1	-	-
TRIAE_CS42_1BL_TGACv1_030290_AA0085600	1	-	-
TRIAE_CS42_1BL_TGACv1_030291_AA0085640	1	-	-
TRIAE_CS42_1BL_TGACv1_030293_AA0085660	1	-	-
TRIAE_CS42_1BL_TGACv1_030300_AA0085930	1	-	-
TRIAE_CS42_1BL_TGACv1_030307_AA0086230	1	-	-
TRIAE_CS42_1BL_TGACv1_030309_AA0086320	1	HD-ZIP	-
TRIAE_CS42_1BL_TGACv1_030317_AA0086530	1	-	-
TRIAE_CS42_1BL_TGACv1_030348_AA0087660	1	-	-
TRIAE_CS42_1BL_TGACv1_030350_AA0087730	1	-	-
TRIAE_CS42_1BL_TGACv1_030355_AA0087860	1	-	-
TRIAE_CS42_1BL_TGACv1_030356_AA0087870	1	-	-
TRIAE_CS42_1BL_TGACv1_030365_AA0088070	1	-	-
TRIAE_CS42_1BL_TGACv1_030366_AA0088140	1	-	-
TRIAE_CS42_1BL_TGACv1_030372_AA0088280	1	-	-
TRIAE_CS42_1BL_TGACv1_030373_AA0088390	1	-	-
TRIAE_CS42_1BL_TGACv1_030377_AA0088540	1	-	-
TRIAE_CS42_1BL_TGACv1_030385_AA0088950	1	-	-
TRIAE_CS42_1BL_TGACv1_030394_AA0089370	1	-	-
TRIAE_CS42_1BL_TGACv1_030395_AA0089430	1	-	-
TRIAE_CS42_1BL_TGACv1_030395_AA0089440	1	-	-
TRIAE_CS42_1BL_TGACv1_030396_AA0089450	1	-	-
TRIAE_CS42_1BL_TGACv1_030408_AA0089770	1	-	-
TRIAE_CS42_1BL_TGACv1_030408_AA0089810	1	-	-
TRIAE_CS42_1BL_TGACv1_030411_AA0089860	1	-	-
TRIAE_CS42_1BL_TGACv1_030411_AA0089870	1	-	-
TRIAE_CS42_1BL_TGACv1_030413_AA0089980	1	-	-
TRIAE_CS42_1BL_TGACv1_030417_AA0090090	1	-	-
TRIAE_CS42_1BL_TGACv1_030423_AA0090330	1	-	-
TRIAE_CS42_1BL_TGACv1_030424_AA0090350	1	-	-
TRIAE_CS42_1BL_TGACv1_030444_AA0090810	1	-	-
TRIAE_CS42_1BL_TGACv1_030454_AA0091110	1	-	-
TRIAE_CS42_1BL_TGACv1_030456_AA0091210	1	-	-
TRIAE_CS42_1BL_TGACv1_030463_AA0091500	1	-	-
TRIAE_CS42_1BL_TGACv1_030502_AA0092510	1	-	-
TRIAE_CS42_1BL_TGACv1_030517_AA0093030	1	-	-
TRIAE_CS42_1BL_TGACv1_030527_AA0093220	1	-	-
TRIAE_CS42_1BL_TGACv1_030527_AA0093230	1	-	-
TRIAE_CS42_1BL_TGACv1_030534_AA0093410	1	-	-
TRIAE_CS42_1BL_TGACv1_030550_AA0093800	1	-	-
TRIAE_CS42_1BL_TGACv1_030554_AA0093900	1	-	-
TRIAE_CS42_1BL_TGACv1_030565_AA0094150	1	-	-
TRIAE_CS42_1BL_TGACv1_030567_AA0094160	1	-	-
TRIAE_CS42_1BL_TGACv1_030567_AA0094180	1	-	-
TRIAE_CS42_1BL_TGACv1_030570_AA0094350	1	-	-
TRIAE_CS42_1BL_TGACv1_030573_AA0094520	1	-	-
TRIAE_CS42_1BL_TGACv1_030573_AA0094530	1	MYB_related	-
TRIAE_CS42_1BL_TGACv1_030573_AA0094540	1	MYB_related	-
TRIAE_CS42_1BL_TGACv1_030579_AA0094660	1	-	-
TRIAE_CS42_1BL_TGACv1_030579_AA0094710	1	-	-
TRIAE_CS42_1BL_TGACv1_030583_AA0094780	1	-	-
TRIAE_CS42_1BL_TGACv1_030589_AA0094880	1	G2-like	-
TRIAE_CS42_1BL_TGACv1_030594_AA0095080	1	-	-
TRIAE_CS42_1BL_TGACv1_030599_AA0095290	1	-	-
TRIAE_CS42_1BL_TGACv1_030617_AA0095940	1	-	-
TRIAE_CS42_1BL_TGACv1_030627_AA0096320	1	-	-
TRIAE_CS42_1BL_TGACv1_030630_AA0096340	1	-	-
TRIAE_CS42_1BL_TGACv1_030646_AA0096810	1	-	-
TRIAE_CS42_1BL_TGACv1_030651_AA0096920	1	-	-
TRIAE_CS42_1BL_TGACv1_030662_AA0097210	1	-	-
TRIAE_CS42_1BL_TGACv1_030671_AA0097500	1	-	-
TRIAE_CS42_1BL_TGACv1_030671_AA0097540	1	-	-
TRIAE_CS42_1BL_TGACv1_030676_AA0097630	1	-	-
TRIAE_CS42_1BL_TGACv1_030689_AA0097930	1	-	-
TRIAE_CS42_1BL_TGACv1_030695_AA0098080	1	-	-
TRIAE_CS42_1BL_TGACv1_030695_AA0098090	1	-	-
TRIAE_CS42_1BL_TGACv1_030695_AA0098100	1	-	-
TRIAE_CS42_1BL_TGACv1_030700_AA0098300	1	-	-
TRIAE_CS42_1BL_TGACv1_030711_AA0098570	1	-	-
TRIAE_CS42_1BL_TGACv1_030714_AA0098770	1	-	-
TRIAE_CS42_1BL_TGACv1_030715_AA0098950	1	-	-
TRIAE_CS42_1BL_TGACv1_030725_AA0099240	1	-	-
TRIAE_CS42_1BL_TGACv1_030726_AA0099270	1	-	-
TRIAE_CS42_1BL_TGACv1_030735_AA0099450	1	-	-
TRIAE_CS42_1BL_TGACv1_030736_AA0099490	1	-	-
TRIAE_CS42_1BL_TGACv1_030737_AA0099530	1	-	-
TRIAE_CS42_1BL_TGACv1_030738_AA0099550	1	-	-
TRIAE_CS42_1BL_TGACv1_030748_AA0099740	1	-	-
TRIAE_CS42_1BL_TGACv1_030751_AA0099860	1	-	-
TRIAE_CS42_1BL_TGACv1_030757_AA0100060	1	-	-
TRIAE_CS42_1BL_TGACv1_030765_AA0100150	1	-	-
TRIAE_CS42_1BL_TGACv1_030765_AA0100160	1	-	-
TRIAE_CS42_1BL_TGACv1_030765_AA0100180	1	-	-
TRIAE_CS42_1BL_TGACv1_030765_AA0100200	1	-	-
TRIAE_CS42_1BL_TGACv1_030765_AA0100220	1	-	-
TRIAE_CS42_1BL_TGACv1_030768_AA0100370	1	-	-
TRIAE_CS42_1BL_TGACv1_030771_AA0100400	1	-	-
TRIAE_CS42_1BL_TGACv1_030772_AA0100420	1	-	-
TRIAE_CS42_1BL_TGACv1_030775_AA0100490	1	-	-
TRIAE_CS42_1BL_TGACv1_030781_AA0100680	1	-	-
TRIAE_CS42_1BL_TGACv1_030792_AA0100930	1	-	-
TRIAE_CS42_1BL_TGACv1_030815_AA0101310	1	-	-
TRIAE_CS42_1BL_TGACv1_030825_AA0101590	1	-	-
TRIAE_CS42_1BL_TGACv1_030825_AA0101620	1	-	-
TRIAE_CS42_1BL_TGACv1_030856_AA0102410	1	-	-
TRIAE_CS42_1BL_TGACv1_030870_AA0102690	1	-	-
TRIAE_CS42_1BL_TGACv1_030873_AA0102790	1	-	-
TRIAE_CS42_1BL_TGACv1_030886_AA0103100	1	-	-
TRIAE_CS42_1BL_TGACv1_030892_AA0103320	1	-	-
TRIAE_CS42_1BL_TGACv1_030913_AA0103720	1	-	-
TRIAE_CS42_1BL_TGACv1_030913_AA0103750	1	-	-
TRIAE_CS42_1BL_TGACv1_030914_AA0103770	1	-	-
TRIAE_CS42_1BL_TGACv1_030924_AA0103890	1	-	-
TRIAE_CS42_1BL_TGACv1_030927_AA0103930	1	-	-
TRIAE_CS42_1BL_TGACv1_030947_AA0104120	1	-	-
TRIAE_CS42_1BL_TGACv1_030955_AA0104350	1	-	-
TRIAE_CS42_1BL_TGACv1_030955_AA0104360	1	-	-
TRIAE_CS42_1BL_TGACv1_030978_AA0104940	1	-	-
TRIAE_CS42_1BL_TGACv1_030987_AA0105120	1	-	-
TRIAE_CS42_1BL_TGACv1_031004_AA0105530	1	-	-
TRIAE_CS42_1BL_TGACv1_031006_AA0105630	1	-	-
TRIAE_CS42_1BL_TGACv1_031030_AA0106260	1	-	-
TRIAE_CS42_1BL_TGACv1_031032_AA0106310	1	-	-
TRIAE_CS42_1BL_TGACv1_031039_AA0106480	1	-	-
TRIAE_CS42_1BL_TGACv1_031049_AA0106710	1	-	-
TRIAE_CS42_1BL_TGACv1_031058_AA0106940	1	-	-
TRIAE_CS42_1BL_TGACv1_031059_AA0106950	1	-	-
TRIAE_CS42_1BL_TGACv1_031077_AA0107260	1	-	-
TRIAE_CS42_1BL_TGACv1_031095_AA0107500	1	-	-
TRIAE_CS42_1BL_TGACv1_031100_AA0107640	1	-	-
TRIAE_CS42_1BL_TGACv1_031100_AA0107670	1	-	-
TRIAE_CS42_1BL_TGACv1_031105_AA0107820	1	-	-
TRIAE_CS42_1BL_TGACv1_031113_AA0108080	1	-	-
TRIAE_CS42_1BL_TGACv1_031131_AA0108370	1	-	-
TRIAE_CS42_1BL_TGACv1_031136_AA0108450	1	-	-
TRIAE_CS42_1BL_TGACv1_031138_AA0108470	1	-	-
TRIAE_CS42_1BL_TGACv1_031139_AA0108480	1	-	-
TRIAE_CS42_1BL_TGACv1_031152_AA0108740	1	-	-
TRIAE_CS42_1BL_TGACv1_031152_AA0108780	1	-	-
TRIAE_CS42_1BL_TGACv1_031159_AA0108940	1	HSF	-
TRIAE_CS42_1BL_TGACv1_031160_AA0108950	1	-	-
TRIAE_CS42_1BL_TGACv1_031186_AA0109330	1	-	-
TRIAE_CS42_1BL_TGACv1_031209_AA0109650	1	-	-
TRIAE_CS42_1BL_TGACv1_031219_AA0109840	1	-	-
TRIAE_CS42_1BL_TGACv1_031234_AA0110060	1	-	-
TRIAE_CS42_1BL_TGACv1_031241_AA0110230	1	WRKY	-
TRIAE_CS42_1BL_TGACv1_031247_AA0110350	1	-	-
TRIAE_CS42_1BL_TGACv1_031249_AA0110360	1	-	-
TRIAE_CS42_1BL_TGACv1_031255_AA0110440	1	-	-
TRIAE_CS42_1BL_TGACv1_031266_AA0110650	1	-	-
TRIAE_CS42_1BL_TGACv1_031291_AA0110890	1	-	-
TRIAE_CS42_1BL_TGACv1_031299_AA0111060	1	-	-
TRIAE_CS42_1BL_TGACv1_031303_AA0111100	1	-	-
TRIAE_CS42_1BL_TGACv1_031315_AA0111470	1	-	-
TRIAE_CS42_1BL_TGACv1_031332_AA0111780	1	-	-
TRIAE_CS42_1BL_TGACv1_031356_AA0112250	1	-	-
TRIAE_CS42_1BL_TGACv1_031364_AA0112410	1	-	-
TRIAE_CS42_1BL_TGACv1_031365_AA0112470	1	-	-
TRIAE_CS42_1BL_TGACv1_031367_AA0112590	1	-	-
TRIAE_CS42_1BL_TGACv1_031373_AA0112800	1	-	-
TRIAE_CS42_1BL_TGACv1_031394_AA0113080	1	-	-
TRIAE_CS42_1BL_TGACv1_031394_AA0113120	1	-	-
TRIAE_CS42_1BL_TGACv1_031407_AA0113400	1	-	-
TRIAE_CS42_1BL_TGACv1_031418_AA0113630	1	-	-
TRIAE_CS42_1BL_TGACv1_031425_AA0113820	1	-	-
TRIAE_CS42_1BL_TGACv1_031430_AA0113890	1	-	-
TRIAE_CS42_1BL_TGACv1_031433_AA0113960	1	-	-
TRIAE_CS42_1BL_TGACv1_031445_AA0114280	1	-	-
TRIAE_CS42_1BL_TGACv1_031448_AA0114310	1	-	-
TRIAE_CS42_1BL_TGACv1_031454_AA0114440	1	-	-
TRIAE_CS42_1BL_TGACv1_031472_AA0114760	1	MYB_related	-
TRIAE_CS42_1BL_TGACv1_031480_AA0114860	1	-	-
TRIAE_CS42_1BL_TGACv1_031509_AA0115260	1	-	-
TRIAE_CS42_1BL_TGACv1_031510_AA0115310	1	-	-
TRIAE_CS42_1BL_TGACv1_031513_AA0115320	1	-	-
TRIAE_CS42_1BL_TGACv1_031515_AA0115380	1	-	-
TRIAE_CS42_1BL_TGACv1_031515_AA0115390	1	-	-
TRIAE_CS42_1BL_TGACv1_031523_AA0115550	1	-	-
TRIAE_CS42_1BL_TGACv1_031526_AA0115640	1	-	-
TRIAE_CS42_1BL_TGACv1_031537_AA0115770	1	-	-
TRIAE_CS42_1BL_TGACv1_031552_AA0115910	1	-	-
TRIAE_CS42_1BL_TGACv1_031556_AA0116010	1	-	-
TRIAE_CS42_1BL_TGACv1_031556_AA0116030	1	-	-
TRIAE_CS42_1BL_TGACv1_031563_AA0116200	1	-	-
TRIAE_CS42_1BL_TGACv1_031563_AA0116220	1	-	-
TRIAE_CS42_1BL_TGACv1_031568_AA0116280	1	-	-
TRIAE_CS42_1BL_TGACv1_031572_AA0116390	1	-	-
TRIAE_CS42_1BL_TGACv1_031583_AA0116450	1	-	-
TRIAE_CS42_1BL_TGACv1_031597_AA0116810	1	-	-
TRIAE_CS42_1BL_TGACv1_031604_AA0116980	1	-	-
TRIAE_CS42_1BL_TGACv1_031605_AA0117010	1	-	-
TRIAE_CS42_1BL_TGACv1_031634_AA0117550	1	-	-
TRIAE_CS42_1BL_TGACv1_031638_AA0117630	1	-	-
TRIAE_CS42_1BL_TGACv1_031640_AA0117760	1	-	-
TRIAE_CS42_1BL_TGACv1_031654_AA0118000	1	-	-
TRIAE_CS42_1BL_TGACv1_031655_AA0118030	1	-	-
TRIAE_CS42_1BL_TGACv1_031662_AA0118230	1	-	-
TRIAE_CS42_1BL_TGACv1_031670_AA0118380	1	-	-
TRIAE_CS42_1BL_TGACv1_031677_AA0118550	1	-	-
TRIAE_CS42_1BL_TGACv1_031678_AA0118620	1	-	-
TRIAE_CS42_1BL_TGACv1_031678_AA0118630	1	-	-
TRIAE_CS42_1BL_TGACv1_031681_AA0118730	1	-	-
TRIAE_CS42_1BL_TGACv1_031687_AA0118830	1	-	-
TRIAE_CS42_1BL_TGACv1_031696_AA0119070	1	-	-
TRIAE_CS42_1BL_TGACv1_031696_AA0119100	1	-	-
TRIAE_CS42_1BL_TGACv1_031702_AA0119200	1	-	-
TRIAE_CS42_1BL_TGACv1_031763_AA0120240	1	-	-
TRIAE_CS42_1BL_TGACv1_031765_AA0120270	1	-	-
TRIAE_CS42_1BL_TGACv1_031792_AA0120630	1	-	-
TRIAE_CS42_1BL_TGACv1_031799_AA0120780	1	-	-
TRIAE_CS42_1BL_TGACv1_031799_AA0120790	1	-	-
TRIAE_CS42_1BL_TGACv1_031850_AA0121710	1	-	-
TRIAE_CS42_1BL_TGACv1_031852_AA0121760	1	-	-
TRIAE_CS42_1BL_TGACv1_031852_AA0121780	1	-	-
TRIAE_CS42_1BL_TGACv1_031862_AA0121890	1	GRAS	-
TRIAE_CS42_1BL_TGACv1_031863_AA0121910	1	WRKY	-
TRIAE_CS42_1BL_TGACv1_031864_AA0121920	1	-	-
TRIAE_CS42_1BL_TGACv1_031874_AA0122120	1	-	-
TRIAE_CS42_1BL_TGACv1_031893_AA0122280	1	-	-
TRIAE_CS42_1BL_TGACv1_031904_AA0122510	1	-	-
TRIAE_CS42_1BL_TGACv1_031906_AA0122620	1	-	-
TRIAE_CS42_1BL_TGACv1_031909_AA0122690	1	-	-
TRIAE_CS42_1BL_TGACv1_031917_AA0122760	1	-	-
TRIAE_CS42_1BL_TGACv1_031944_AA0123100	1	-	-
TRIAE_CS42_1BL_TGACv1_031957_AA0123470	1	-	-
TRIAE_CS42_1BL_TGACv1_031960_AA0123510	1	-	-
TRIAE_CS42_1BL_TGACv1_031993_AA0123970	1	-	-
TRIAE_CS42_1BL_TGACv1_032012_AA0124190	1	-	-
TRIAE_CS42_1BL_TGACv1_032021_AA0124300	1	-	-
TRIAE_CS42_1BL_TGACv1_032057_AA0124820	1	-	-
TRIAE_CS42_1BL_TGACv1_032060_AA0124880	1	MYB_related	-
TRIAE_CS42_1BL_TGACv1_032124_AA0125720	1	-	-
TRIAE_CS42_1BL_TGACv1_032135_AA0125830	1	-	-
TRIAE_CS42_1BL_TGACv1_032137_AA0125860	1	-	-
TRIAE_CS42_1BL_TGACv1_032139_AA0125890	1	-	-
TRIAE_CS42_1BL_TGACv1_032153_AA0126070	1	-	-
TRIAE_CS42_1BL_TGACv1_032156_AA0126110	1	-	-
TRIAE_CS42_1BL_TGACv1_032156_AA0126120	1	-	-
TRIAE_CS42_1BL_TGACv1_032156_AA0126140	1	-	-
TRIAE_CS42_1BL_TGACv1_032171_AA0126270	1	-	-
TRIAE_CS42_1BL_TGACv1_032182_AA0126440	1	-	-
TRIAE_CS42_1BL_TGACv1_032188_AA0126520	1	-	-
TRIAE_CS42_1BL_TGACv1_032191_AA0126550	1	-	-
TRIAE_CS42_1BL_TGACv1_032191_AA0126600	1	-	-
TRIAE_CS42_1BL_TGACv1_032201_AA0126620	1	WRKY	-
TRIAE_CS42_1BL_TGACv1_032219_AA0126980	1	-	-
TRIAE_CS42_1BL_TGACv1_032219_AA0126990	1	-	-
TRIAE_CS42_1BL_TGACv1_032225_AA0127040	1	MYB_related	-
TRIAE_CS42_1BL_TGACv1_032227_AA0127110	1	-	-
TRIAE_CS42_1BL_TGACv1_032262_AA0127620	1	-	-
TRIAE_CS42_1BL_TGACv1_032269_AA0127750	1	-	-
TRIAE_CS42_1BL_TGACv1_032276_AA0127780	1	-	-
TRIAE_CS42_1BL_TGACv1_032287_AA0128020	1	-	-
TRIAE_CS42_1BL_TGACv1_032287_AA0128030	1	-	-
TRIAE_CS42_1BL_TGACv1_032300_AA0128160	1	-	-
TRIAE_CS42_1BL_TGACv1_032305_AA0128230	1	-	-
TRIAE_CS42_1BL_TGACv1_032317_AA0128270	1	-	-
TRIAE_CS42_1BL_TGACv1_032319_AA0128310	1	-	-
TRIAE_CS42_1BL_TGACv1_032323_AA0128400	1	-	-
TRIAE_CS42_1BL_TGACv1_032331_AA0128560	1	-	-
TRIAE_CS42_1BL_TGACv1_032331_AA0128570	1	-	-
TRIAE_CS42_1BL_TGACv1_032339_AA0128640	1	-	-
TRIAE_CS42_1BL_TGACv1_032339_AA0128660	1	-	-
TRIAE_CS42_1BL_TGACv1_032339_AA0128670	1	-	-
TRIAE_CS42_1BL_TGACv1_032364_AA0128960	1	-	-
TRIAE_CS42_1BL_TGACv1_032368_AA0129000	1	-	-
TRIAE_CS42_1BL_TGACv1_032371_AA0129060	1	-	-
TRIAE_CS42_1BL_TGACv1_032375_AA0129080	1	-	-
TRIAE_CS42_1BL_TGACv1_032408_AA0129550	1	-	-
TRIAE_CS42_1BL_TGACv1_032417_AA0129610	1	-	-
TRIAE_CS42_1BL_TGACv1_032417_AA0129620	1	-	-
TRIAE_CS42_1BL_TGACv1_032417_AA0129650	1	-	-
TRIAE_CS42_1BL_TGACv1_032445_AA0129910	1	-	-
TRIAE_CS42_1BL_TGACv1_032445_AA0129920	1	HD-ZIP	-
TRIAE_CS42_1BL_TGACv1_032445_AA0129930	1	-	-
TRIAE_CS42_1BL_TGACv1_032451_AA0130050	1	-	-
TRIAE_CS42_1BL_TGACv1_032451_AA0130070	1	-	-
TRIAE_CS42_1BL_TGACv1_032456_AA0130120	1	-	-
TRIAE_CS42_1BL_TGACv1_032462_AA0130150	1	-	-
TRIAE_CS42_1BL_TGACv1_032467_AA0130230	1	-	-
TRIAE_CS42_1BL_TGACv1_032476_AA0130290	1	-	-
TRIAE_CS42_1BL_TGACv1_032496_AA0130510	1	-	-
TRIAE_CS42_1BL_TGACv1_032507_AA0130650	1	-	-
TRIAE_CS42_1BL_TGACv1_032509_AA0130750	1	-	-
TRIAE_CS42_1BL_TGACv1_032556_AA0131440	1	-	-
TRIAE_CS42_1BL_TGACv1_032596_AA0131790	1	RAV	-
TRIAE_CS42_1BL_TGACv1_032601_AA0131890	1	-	-
TRIAE_CS42_1BL_TGACv1_032657_AA0132500	1	-	-
TRIAE_CS42_1BL_TGACv1_032669_AA0132640	1	-	-
TRIAE_CS42_1BL_TGACv1_032671_AA0132660	1	-	-
TRIAE_CS42_1BL_TGACv1_032676_AA0132780	1	-	-
TRIAE_CS42_1BL_TGACv1_032679_AA0132810	1	-	-
TRIAE_CS42_1BL_TGACv1_032690_AA0132950	1	-	-
TRIAE_CS42_1BL_TGACv1_032726_AA0133380	1	-	-
TRIAE_CS42_1BL_TGACv1_032741_AA0133580	1	-	-
TRIAE_CS42_1BL_TGACv1_032757_AA0133870	1	-	-
TRIAE_CS42_1BL_TGACv1_032784_AA0134120	1	-	-
TRIAE_CS42_1BL_TGACv1_032785_AA0134130	1	-	-
TRIAE_CS42_1BL_TGACv1_032821_AA0134420	1	-	-
TRIAE_CS42_1BL_TGACv1_032824_AA0134500	1	-	-
TRIAE_CS42_1BL_TGACv1_032824_AA0134510	1	-	-
TRIAE_CS42_1BL_TGACv1_032860_AA0134860	1	-	-
TRIAE_CS42_1BL_TGACv1_032898_AA0135190	1	-	-
TRIAE_CS42_1BL_TGACv1_032917_AA0135410	1	-	-
TRIAE_CS42_1BL_TGACv1_032923_AA0135480	1	-	-
TRIAE_CS42_1BL_TGACv1_032937_AA0135610	1	-	-
TRIAE_CS42_1BL_TGACv1_033050_AA0136450	1	-	-
TRIAE_CS42_1BL_TGACv1_033050_AA0136480	1	-	-
TRIAE_CS42_1BL_TGACv1_033061_AA0136580	1	-	-
TRIAE_CS42_1BL_TGACv1_033087_AA0136910	1	-	-
TRIAE_CS42_1BL_TGACv1_033102_AA0137070	1	-	-
TRIAE_CS42_1BL_TGACv1_033126_AA0137200	1	-	-
TRIAE_CS42_1BL_TGACv1_033136_AA0137280	1	-	-
TRIAE_CS42_1BL_TGACv1_033137_AA0137290	1	-	-
TRIAE_CS42_1BL_TGACv1_033167_AA0137520	1	-	-
TRIAE_CS42_1BL_TGACv1_033193_AA0137720	1	-	-
TRIAE_CS42_1BL_TGACv1_033204_AA0137790	1	-	-
TRIAE_CS42_1BL_TGACv1_033228_AA0137930	1	-	-
TRIAE_CS42_1BL_TGACv1_033245_AA0138120	1	-	-
TRIAE_CS42_1BL_TGACv1_033250_AA0138170	1	-	-
TRIAE_CS42_1BL_TGACv1_033250_AA0138180	1	-	-
TRIAE_CS42_1BL_TGACv1_033255_AA0138200	1	-	-
TRIAE_CS42_1BL_TGACv1_033291_AA0138500	1	-	-
TRIAE_CS42_1BL_TGACv1_033295_AA0138570	1	-	-
TRIAE_CS42_1BL_TGACv1_033339_AA0138850	1	-	-
TRIAE_CS42_1BL_TGACv1_033367_AA0138980	1	-	-
TRIAE_CS42_1BL_TGACv1_033403_AA0139210	1	-	-
TRIAE_CS42_1BL_TGACv1_033437_AA0139410	1	-	-
TRIAE_CS42_1BL_TGACv1_033482_AA0139790	1	-	-
TRIAE_CS42_1BL_TGACv1_033482_AA0139800	1	-	-
TRIAE_CS42_1BL_TGACv1_033506_AA0139950	1	-	-
TRIAE_CS42_1BL_TGACv1_033532_AA0140150	1	-	-
TRIAE_CS42_1BL_TGACv1_033535_AA0140190	1	-	-
TRIAE_CS42_1BL_TGACv1_033544_AA0140260	1	-	-
TRIAE_CS42_1BL_TGACv1_033573_AA0140430	1	-	-
TRIAE_CS42_1BL_TGACv1_033595_AA0140530	1	-	-
TRIAE_CS42_1BL_TGACv1_033598_AA0140580	1	-	-
TRIAE_CS42_1BL_TGACv1_033617_AA0140640	1	-	-
TRIAE_CS42_1BL_TGACv1_033624_AA0140750	1	-	-
TRIAE_CS42_1BL_TGACv1_033631_AA0140840	1	-	-
TRIAE_CS42_1BL_TGACv1_033649_AA0141020	1	-	-
TRIAE_CS42_1BL_TGACv1_033668_AA0141200	1	-	-
TRIAE_CS42_1BL_TGACv1_033718_AA0141660	1	-	-
TRIAE_CS42_1BL_TGACv1_033791_AA0142080	1	-	-
TRIAE_CS42_1BL_TGACv1_033796_AA0142110	1	-	-
TRIAE_CS42_1BL_TGACv1_033916_AA0142620	1	-	-
TRIAE_CS42_1BL_TGACv1_033928_AA0142640	1	NAC	NAC-b
TRIAE_CS42_1BL_TGACv1_033938_AA0142690	1	TALE	-
TRIAE_CS42_1BL_TGACv1_033942_AA0142710	1	-	-
TRIAE_CS42_1BL_TGACv1_033990_AA0143000	1	-	-
TRIAE_CS42_1BL_TGACv1_033999_AA0143060	1	-	-
TRIAE_CS42_1BL_TGACv1_034040_AA0143180	1	-	-
TRIAE_CS42_1BL_TGACv1_034054_AA0143270	1	-	-
TRIAE_CS42_1BL_TGACv1_034100_AA0143410	1	-	-
TRIAE_CS42_1BL_TGACv1_034148_AA0143620	1	WRKY	-
TRIAE_CS42_1BL_TGACv1_034205_AA0143770	1	MYB_related	-
TRIAE_CS42_1BL_TGACv1_034262_AA0144000	1	-	-
TRIAE_CS42_1BL_TGACv1_034275_AA0144070	1	-	-
TRIAE_CS42_1BL_TGACv1_034320_AA0144200	1	-	-
TRIAE_CS42_1BL_TGACv1_034405_AA0144440	1	-	-
TRIAE_CS42_1BL_TGACv1_034417_AA0144470	1	C2H2	-
TRIAE_CS42_1BL_TGACv1_034481_AA0144620	1	-	-
TRIAE_CS42_1BL_TGACv1_034526_AA0144740	1	-	-
TRIAE_CS42_1BL_TGACv1_034556_AA0144850	1	-	-
TRIAE_CS42_1BL_TGACv1_034575_AA0144910	1	-	-
TRIAE_CS42_1BL_TGACv1_034629_AA0145150	1	-	-
TRIAE_CS42_1BL_TGACv1_034650_AA0145200	1	-	-
TRIAE_CS42_1BL_TGACv1_034673_AA0145270	1	-	-
TRIAE_CS42_1BL_TGACv1_034678_AA0145290	1	bHLH	-
TRIAE_CS42_1BL_TGACv1_034783_AA0145580	1	-	-
TRIAE_CS42_1BL_TGACv1_034937_AA0145830	1	-	-
TRIAE_CS42_1BL_TGACv1_035072_AA0146110	1	-	-
TRIAE_CS42_1BL_TGACv1_035106_AA0146190	1	-	-
TRIAE_CS42_1BL_TGACv1_035130_AA0146220	1	-	-
TRIAE_CS42_1BL_TGACv1_035425_AA0146600	1	-	-
TRIAE_CS42_1BL_TGACv1_035559_AA0146840	1	-	-
TRIAE_CS42_1BL_TGACv1_036885_AA0147490	1	-	-
TRIAE_CS42_1BL_TGACv1_038430_AA0147930	1	-	-
TRIAE_CS42_1BL_TGACv1_038611_AA0148010	1	-	-
TRIAE_CS42_1BL_TGACv1_039956_AA0148300	1	-	-
TRIAE_CS42_1BL_TGACv1_041773_AA0148600	1	-	-
TRIAE_CS42_1BL_TGACv1_042541_AA0148710	1	-	-
TRIAE_CS42_1BL_TGACv1_043564_AA0148870	1	-	-
TRIAE_CS42_1BL_TGACv1_726346_AA2170290	1	-	-
TRIAE_CS42_1BL_TGACv1_726352_AA2170300	1	-	-
TRIAE_CS42_1BS_TGACv1_049343_AA0149450	1	-	-
TRIAE_CS42_1BS_TGACv1_049347_AA0149840	1	-	-
TRIAE_CS42_1BS_TGACv1_049353_AA0149970	1	-	-
TRIAE_CS42_1BS_TGACv1_049356_AA0150130	1	-	-
TRIAE_CS42_1BS_TGACv1_049359_AA0150360	1	-	-
TRIAE_CS42_1BS_TGACv1_049369_AA0150920	1	-	-
TRIAE_CS42_1BS_TGACv1_049380_AA0151300	1	-	-
TRIAE_CS42_1BS_TGACv1_049380_AA0151310	1	-	-
TRIAE_CS42_1BS_TGACv1_049387_AA0151760	1	-	-
TRIAE_CS42_1BS_TGACv1_049392_AA0151940	1	-	-
TRIAE_CS42_1BS_TGACv1_049401_AA0152360	1	-	-
TRIAE_CS42_1BS_TGACv1_049411_AA0152770	1	-	-
TRIAE_CS42_1BS_TGACv1_049417_AA0152990	1	-	-
TRIAE_CS42_1BS_TGACv1_049418_AA0153070	1	-	-
TRIAE_CS42_1BS_TGACv1_049435_AA0153550	1	-	-
TRIAE_CS42_1BS_TGACv1_049446_AA0153990	1	-	-
TRIAE_CS42_1BS_TGACv1_049477_AA0154500	1	-	-
TRIAE_CS42_1BS_TGACv1_049483_AA0154580	1	-	-
TRIAE_CS42_1BS_TGACv1_049504_AA0155180	1	-	-
TRIAE_CS42_1BS_TGACv1_049522_AA0155720	1	-	-
TRIAE_CS42_1BS_TGACv1_049534_AA0156080	1	-	-
TRIAE_CS42_1BS_TGACv1_049540_AA0156160	1	-	-
TRIAE_CS42_1BS_TGACv1_049541_AA0156240	1	-	-
TRIAE_CS42_1BS_TGACv1_049567_AA0157010	1	-	-
TRIAE_CS42_1BS_TGACv1_049580_AA0157220	1	-	-
TRIAE_CS42_1BS_TGACv1_049580_AA0157230	1	-	-
TRIAE_CS42_1BS_TGACv1_049612_AA0157990	1	-	-
TRIAE_CS42_1BS_TGACv1_049612_AA0158010	1	-	-
TRIAE_CS42_1BS_TGACv1_049612_AA0158020	1	-	-
TRIAE_CS42_1BS_TGACv1_049623_AA0158320	1	-	-
TRIAE_CS42_1BS_TGACv1_049667_AA0159190	1	-	-
TRIAE_CS42_1BS_TGACv1_049677_AA0159460	1	-	-
TRIAE_CS42_1BS_TGACv1_049680_AA0159480	1	-	-
TRIAE_CS42_1BS_TGACv1_049695_AA0159810	1	-	-
TRIAE_CS42_1BS_TGACv1_049738_AA0160720	1	-	-
TRIAE_CS42_1BS_TGACv1_049785_AA0161380	1	-	-
TRIAE_CS42_1BS_TGACv1_049801_AA0161750	1	-	-
TRIAE_CS42_1BS_TGACv1_049801_AA0161780	1	-	-
TRIAE_CS42_1BS_TGACv1_049824_AA0162230	1	-	-
TRIAE_CS42_1BS_TGACv1_049842_AA0162750	1	-	-
TRIAE_CS42_1BS_TGACv1_049852_AA0163030	1	-	-
TRIAE_CS42_1BS_TGACv1_049857_AA0163120	1	-	-
TRIAE_CS42_1BS_TGACv1_049876_AA0163320	1	-	-
TRIAE_CS42_1BS_TGACv1_049876_AA0163360	1	-	-
TRIAE_CS42_1BS_TGACv1_049891_AA0163670	1	-	-
TRIAE_CS42_1BS_TGACv1_049911_AA0164060	1	-	-
TRIAE_CS42_1BS_TGACv1_049914_AA0164140	1	-	-
TRIAE_CS42_1BS_TGACv1_049956_AA0164740	1	-	-
TRIAE_CS42_1BS_TGACv1_049968_AA0165030	1	-	-
TRIAE_CS42_1BS_TGACv1_049997_AA0165570	1	-	-
TRIAE_CS42_1BS_TGACv1_049997_AA0165580	1	-	-
TRIAE_CS42_1BS_TGACv1_050022_AA0166100	1	-	-
TRIAE_CS42_1BS_TGACv1_050027_AA0166160	1	-	-
TRIAE_CS42_1BS_TGACv1_050031_AA0166220	1	-	-
TRIAE_CS42_1BS_TGACv1_050042_AA0166370	1	-	-
TRIAE_CS42_1BS_TGACv1_050118_AA0167630	1	-	-
TRIAE_CS42_1BS_TGACv1_050120_AA0167710	1	-	-
TRIAE_CS42_1BS_TGACv1_050120_AA0167720	1	-	-
TRIAE_CS42_1BS_TGACv1_050130_AA0167880	1	-	-
TRIAE_CS42_1BS_TGACv1_050135_AA0167940	1	-	-
TRIAE_CS42_1BS_TGACv1_050149_AA0168110	1	-	-
TRIAE_CS42_1BS_TGACv1_050165_AA0168390	1	-	-
TRIAE_CS42_1BS_TGACv1_050166_AA0168410	1	-	-
TRIAE_CS42_1BS_TGACv1_050175_AA0168590	1	-	-
TRIAE_CS42_1BS_TGACv1_050175_AA0168640	1	-	-
TRIAE_CS42_1BS_TGACv1_050185_AA0168750	1	-	-
TRIAE_CS42_1BS_TGACv1_050188_AA0168850	1	-	-
TRIAE_CS42_1BS_TGACv1_050226_AA0169180	1	-	-
TRIAE_CS42_1BS_TGACv1_050232_AA0169250	1	-	-
TRIAE_CS42_1BS_TGACv1_050232_AA0169280	1	-	-
TRIAE_CS42_1BS_TGACv1_050244_AA0169580	1	-	-
TRIAE_CS42_1BS_TGACv1_050249_AA0169670	1	-	-
TRIAE_CS42_1BS_TGACv1_050249_AA0169680	1	-	-
TRIAE_CS42_1BS_TGACv1_050250_AA0169700	1	-	-
TRIAE_CS42_1BS_TGACv1_050262_AA0169750	1	-	-
TRIAE_CS42_1BS_TGACv1_050305_AA0170400	1	-	-
TRIAE_CS42_1BS_TGACv1_050312_AA0170510	1	-	-
TRIAE_CS42_1BS_TGACv1_050329_AA0170760	1	-	-
TRIAE_CS42_1BS_TGACv1_050344_AA0170930	1	-	-
TRIAE_CS42_1BS_TGACv1_050351_AA0171040	1	-	-
TRIAE_CS42_1BS_TGACv1_050362_AA0171230	1	-	-
TRIAE_CS42_1BS_TGACv1_050397_AA0171610	1	-	-
TRIAE_CS42_1BS_TGACv1_050421_AA0171880	1	-	-
TRIAE_CS42_1BS_TGACv1_050434_AA0171990	1	-	-
TRIAE_CS42_1BS_TGACv1_050442_AA0172070	1	-	-
TRIAE_CS42_1BS_TGACv1_050457_AA0172280	1	-	-
TRIAE_CS42_1BS_TGACv1_050467_AA0172460	1	-	-
TRIAE_CS42_1BS_TGACv1_050483_AA0172630	1	C3H	-
TRIAE_CS42_1BS_TGACv1_050486_AA0172680	1	-	-
TRIAE_CS42_1BS_TGACv1_050504_AA0172860	1	-	-
TRIAE_CS42_1BS_TGACv1_050538_AA0173160	1	-	-
TRIAE_CS42_1BS_TGACv1_050538_AA0173170	1	-	-
TRIAE_CS42_1BS_TGACv1_050538_AA0173190	1	-	-
TRIAE_CS42_1BS_TGACv1_050644_AA0174120	1	-	-
TRIAE_CS42_1BS_TGACv1_050671_AA0174330	1	-	-
TRIAE_CS42_1BS_TGACv1_050726_AA0174700	1	-	-
TRIAE_CS42_1BS_TGACv1_050726_AA0174710	1	-	-
TRIAE_CS42_1BS_TGACv1_050758_AA0175150	1	-	-
TRIAE_CS42_1BS_TGACv1_050761_AA0175210	1	-	-
TRIAE_CS42_1BS_TGACv1_050776_AA0175370	1	-	-
TRIAE_CS42_1BS_TGACv1_050778_AA0175410	1	-	-
TRIAE_CS42_1BS_TGACv1_050778_AA0175420	1	-	-
TRIAE_CS42_1BS_TGACv1_050802_AA0175700	1	-	-
TRIAE_CS42_1BS_TGACv1_050864_AA0176280	1	-	-
TRIAE_CS42_1BS_TGACv1_050880_AA0176400	1	HB-other	-
TRIAE_CS42_1BS_TGACv1_050895_AA0176470	1	-	-
TRIAE_CS42_1BS_TGACv1_050895_AA0176480	1	-	-
TRIAE_CS42_1BS_TGACv1_050906_AA0176590	1	WRKY	-
TRIAE_CS42_1BS_TGACv1_050929_AA0176760	1	-	-
TRIAE_CS42_1BS_TGACv1_050931_AA0176800	1	-	-
TRIAE_CS42_1BS_TGACv1_050958_AA0176900	1	-	-
TRIAE_CS42_1BS_TGACv1_051009_AA0177230	1	-	-
TRIAE_CS42_1BS_TGACv1_051152_AA0178150	1	-	-
TRIAE_CS42_1BS_TGACv1_051178_AA0178370	1	-	-
TRIAE_CS42_1BS_TGACv1_051295_AA0179040	1	-	-
TRIAE_CS42_1BS_TGACv1_051311_AA0179100	1	-	-
TRIAE_CS42_1BS_TGACv1_051314_AA0179110	1	-	-
TRIAE_CS42_1BS_TGACv1_051314_AA0179120	1	-	-
TRIAE_CS42_1BS_TGACv1_051318_AA0179150	1	-	-
TRIAE_CS42_1BS_TGACv1_051366_AA0179370	1	-	-
TRIAE_CS42_1BS_TGACv1_051477_AA0180050	1	-	-
TRIAE_CS42_1BS_TGACv1_051495_AA0180110	1	-	-
TRIAE_CS42_1BS_TGACv1_051726_AA0180840	1	-	-
TRIAE_CS42_1BS_TGACv1_051769_AA0180960	1	-	-
TRIAE_CS42_1BS_TGACv1_052012_AA0181210	1	-	-
TRIAE_CS42_1BS_TGACv1_052086_AA0181320	1	-	-
TRIAE_CS42_1BS_TGACv1_052086_AA0181330	1	-	-
TRIAE_CS42_1BS_TGACv1_052170_AA0181450	1	-	-
TRIAE_CS42_1BS_TGACv1_052293_AA0181620	1	-	-
TRIAE_CS42_1BS_TGACv1_052293_AA0181630	1	-	-
TRIAE_CS42_1BS_TGACv1_052525_AA0181760	1	-	-
TRIAE_CS42_1DL_TGACv1_061054_AA0183160	1	-	-
TRIAE_CS42_1DL_TGACv1_061054_AA0183190	1	-	-
TRIAE_CS42_1DL_TGACv1_061054_AA0183260	1	-	-
TRIAE_CS42_1DL_TGACv1_061059_AA0183410	1	-	-
TRIAE_CS42_1DL_TGACv1_061061_AA0183500	1	-	-
TRIAE_CS42_1DL_TGACv1_061063_AA0183570	1	-	-
TRIAE_CS42_1DL_TGACv1_061073_AA0184190	1	-	-
TRIAE_CS42_1DL_TGACv1_061073_AA0184200	1	-	-
TRIAE_CS42_1DL_TGACv1_061074_AA0184220	1	-	-
TRIAE_CS42_1DL_TGACv1_061074_AA0184230	1	-	-
TRIAE_CS42_1DL_TGACv1_061085_AA0184570	1	-	-
TRIAE_CS42_1DL_TGACv1_061085_AA0184620	1	-	-
TRIAE_CS42_1DL_TGACv1_061088_AA0184640	1	-	-
TRIAE_CS42_1DL_TGACv1_061094_AA0184820	1	-	-
TRIAE_CS42_1DL_TGACv1_061094_AA0184880	1	-	-
TRIAE_CS42_1DL_TGACv1_061101_AA0185150	1	-	-
TRIAE_CS42_1DL_TGACv1_061102_AA0185320	1	-	-
TRIAE_CS42_1DL_TGACv1_061105_AA0185540	1	-	-
TRIAE_CS42_1DL_TGACv1_061111_AA0185720	1	-	-
TRIAE_CS42_1DL_TGACv1_061130_AA0186320	1	-	-
TRIAE_CS42_1DL_TGACv1_061133_AA0186390	1	-	-
TRIAE_CS42_1DL_TGACv1_061136_AA0186510	1	-	-
TRIAE_CS42_1DL_TGACv1_061136_AA0186520	1	-	-
TRIAE_CS42_1DL_TGACv1_061137_AA0186540	1	-	-
TRIAE_CS42_1DL_TGACv1_061140_AA0186700	1	-	-
TRIAE_CS42_1DL_TGACv1_061147_AA0187010	1	-	-
TRIAE_CS42_1DL_TGACv1_061149_AA0187080	1	-	-
TRIAE_CS42_1DL_TGACv1_061153_AA0187180	1	-	-
TRIAE_CS42_1DL_TGACv1_061159_AA0187440	1	-	-
TRIAE_CS42_1DL_TGACv1_061159_AA0187450	1	-	-
TRIAE_CS42_1DL_TGACv1_061159_AA0187490	1	WRKY	-
TRIAE_CS42_1DL_TGACv1_061171_AA0187720	1	-	-
TRIAE_CS42_1DL_TGACv1_061172_AA0187750	1	-	-
TRIAE_CS42_1DL_TGACv1_061177_AA0187940	1	-	-
TRIAE_CS42_1DL_TGACv1_061187_AA0188190	1	-	-
TRIAE_CS42_1DL_TGACv1_061188_AA0188250	1	-	-
TRIAE_CS42_1DL_TGACv1_061188_AA0188280	1	-	-
TRIAE_CS42_1DL_TGACv1_061194_AA0188420	1	-	-
TRIAE_CS42_1DL_TGACv1_061200_AA0188550	1	-	-
TRIAE_CS42_1DL_TGACv1_061207_AA0188900	1	-	-
TRIAE_CS42_1DL_TGACv1_061221_AA0189210	1	-	-
TRIAE_CS42_1DL_TGACv1_061246_AA0189820	1	-	-
TRIAE_CS42_1DL_TGACv1_061254_AA0190200	1	-	-
TRIAE_CS42_1DL_TGACv1_061259_AA0190330	1	-	-
TRIAE_CS42_1DL_TGACv1_061263_AA0190400	1	-	-
TRIAE_CS42_1DL_TGACv1_061266_AA0190520	1	-	-
TRIAE_CS42_1DL_TGACv1_061266_AA0190560	1	-	-
TRIAE_CS42_1DL_TGACv1_061271_AA0190660	1	-	-
TRIAE_CS42_1DL_TGACv1_061280_AA0191090	1	-	-
TRIAE_CS42_1DL_TGACv1_061280_AA0191100	1	-	-
TRIAE_CS42_1DL_TGACv1_061281_AA0191170	1	-	-
TRIAE_CS42_1DL_TGACv1_061293_AA0191530	1	-	-
TRIAE_CS42_1DL_TGACv1_061298_AA0191700	1	-	-
TRIAE_CS42_1DL_TGACv1_061306_AA0191980	1	-	-
TRIAE_CS42_1DL_TGACv1_061314_AA0192280	1	-	-
TRIAE_CS42_1DL_TGACv1_061317_AA0192330	1	-	-
TRIAE_CS42_1DL_TGACv1_061338_AA0192540	1	-	-
TRIAE_CS42_1DL_TGACv1_061338_AA0192550	1	-	-
TRIAE_CS42_1DL_TGACv1_061338_AA0192590	1	-	-
TRIAE_CS42_1DL_TGACv1_061340_AA0192670	1	-	-
TRIAE_CS42_1DL_TGACv1_061343_AA0192710	1	-	-
TRIAE_CS42_1DL_TGACv1_061343_AA0192720	1	-	-
TRIAE_CS42_1DL_TGACv1_061344_AA0192740	1	-	-
TRIAE_CS42_1DL_TGACv1_061359_AA0193060	1	-	-
TRIAE_CS42_1DL_TGACv1_061368_AA0193200	1	-	-
TRIAE_CS42_1DL_TGACv1_061368_AA0193230	1	-	-
TRIAE_CS42_1DL_TGACv1_061368_AA0193240	1	-	-
TRIAE_CS42_1DL_TGACv1_061383_AA0193800	1	HSF	-
TRIAE_CS42_1DL_TGACv1_061384_AA0193810	1	-	-
TRIAE_CS42_1DL_TGACv1_061394_AA0194010	1	-	-
TRIAE_CS42_1DL_TGACv1_061394_AA0194030	1	-	-
TRIAE_CS42_1DL_TGACv1_061394_AA0194040	1	-	-
TRIAE_CS42_1DL_TGACv1_061397_AA0194180	1	-	-
TRIAE_CS42_1DL_TGACv1_061407_AA0194400	1	-	-
TRIAE_CS42_1DL_TGACv1_061414_AA0194560	1	-	-
TRIAE_CS42_1DL_TGACv1_061421_AA0194740	1	-	-
TRIAE_CS42_1DL_TGACv1_061427_AA0195100	1	-	-
TRIAE_CS42_1DL_TGACv1_061434_AA0195250	1	WRKY	-
TRIAE_CS42_1DL_TGACv1_061434_AA0195270	1	-	-
TRIAE_CS42_1DL_TGACv1_061449_AA0195530	1	-	-
TRIAE_CS42_1DL_TGACv1_061449_AA0195550	1	-	-
TRIAE_CS42_1DL_TGACv1_061456_AA0195840	1	-	-
TRIAE_CS42_1DL_TGACv1_061467_AA0196060	1	-	-
TRIAE_CS42_1DL_TGACv1_061471_AA0196170	1	-	-
TRIAE_CS42_1DL_TGACv1_061472_AA0196240	1	-	-
TRIAE_CS42_1DL_TGACv1_061472_AA0196250	1	-	-
TRIAE_CS42_1DL_TGACv1_061472_AA0196260	1	-	-
TRIAE_CS42_1DL_TGACv1_061476_AA0196370	1	-	-
TRIAE_CS42_1DL_TGACv1_061484_AA0196620	1	-	-
TRIAE_CS42_1DL_TGACv1_061486_AA0196710	1	-	-
TRIAE_CS42_1DL_TGACv1_061488_AA0196760	1	-	-
TRIAE_CS42_1DL_TGACv1_061501_AA0197030	1	-	-
TRIAE_CS42_1DL_TGACv1_061501_AA0197040	1	-	-
TRIAE_CS42_1DL_TGACv1_061504_AA0197130	1	-	-
TRIAE_CS42_1DL_TGACv1_061512_AA0197350	1	-	-
TRIAE_CS42_1DL_TGACv1_061512_AA0197360	1	-	-
TRIAE_CS42_1DL_TGACv1_061512_AA0197370	1	-	-
TRIAE_CS42_1DL_TGACv1_061512_AA0197380	1	-	-
TRIAE_CS42_1DL_TGACv1_061519_AA0197570	1	-	-
TRIAE_CS42_1DL_TGACv1_061519_AA0197590	1	-	-
TRIAE_CS42_1DL_TGACv1_061536_AA0198180	1	-	-
TRIAE_CS42_1DL_TGACv1_061541_AA0198370	1	-	-
TRIAE_CS42_1DL_TGACv1_061541_AA0198390	1	-	-
TRIAE_CS42_1DL_TGACv1_061546_AA0198450	1	-	-
TRIAE_CS42_1DL_TGACv1_061549_AA0198490	1	-	-
TRIAE_CS42_1DL_TGACv1_061550_AA0198510	1	FAR1	-
TRIAE_CS42_1DL_TGACv1_061551_AA0198570	1	-	-
TRIAE_CS42_1DL_TGACv1_061562_AA0198710	1	-	-
TRIAE_CS42_1DL_TGACv1_061576_AA0198990	1	-	-
TRIAE_CS42_1DL_TGACv1_061588_AA0199220	1	-	-
TRIAE_CS42_1DL_TGACv1_061590_AA0199340	1	-	-
TRIAE_CS42_1DL_TGACv1_061594_AA0199480	1	MYB	-
TRIAE_CS42_1DL_TGACv1_061594_AA0199490	1	-	-
TRIAE_CS42_1DL_TGACv1_061599_AA0199650	1	-	-
TRIAE_CS42_1DL_TGACv1_061607_AA0199860	1	-	-
TRIAE_CS42_1DL_TGACv1_061624_AA0200250	1	-	-
TRIAE_CS42_1DL_TGACv1_061624_AA0200280	1	-	-
TRIAE_CS42_1DL_TGACv1_061625_AA0200310	1	-	-
TRIAE_CS42_1DL_TGACv1_061628_AA0200340	1	-	-
TRIAE_CS42_1DL_TGACv1_061628_AA0200360	1	-	-
TRIAE_CS42_1DL_TGACv1_061630_AA0200480	1	-	-
TRIAE_CS42_1DL_TGACv1_061634_AA0200610	1	-	-
TRIAE_CS42_1DL_TGACv1_061644_AA0200730	1	-	-
TRIAE_CS42_1DL_TGACv1_061647_AA0200890	1	-	-
TRIAE_CS42_1DL_TGACv1_061647_AA0200910	1	-	-
TRIAE_CS42_1DL_TGACv1_061650_AA0201040	1	-	-
TRIAE_CS42_1DL_TGACv1_061653_AA0201090	1	-	-
TRIAE_CS42_1DL_TGACv1_061653_AA0201110	1	-	-
TRIAE_CS42_1DL_TGACv1_061663_AA0201260	1	WRKY	-
TRIAE_CS42_1DL_TGACv1_061663_AA0201290	1	WRKY	-
TRIAE_CS42_1DL_TGACv1_061682_AA0201650	1	-	-
TRIAE_CS42_1DL_TGACv1_061684_AA0201690	1	bHLH	-
TRIAE_CS42_1DL_TGACv1_061695_AA0201870	1	-	-
TRIAE_CS42_1DL_TGACv1_061705_AA0202010	1	-	-
TRIAE_CS42_1DL_TGACv1_061705_AA0202020	1	-	-
TRIAE_CS42_1DL_TGACv1_061710_AA0202080	1	RAV	-
TRIAE_CS42_1DL_TGACv1_061710_AA0202090	1	RAV	-
TRIAE_CS42_1DL_TGACv1_061719_AA0202300	1	-	-
TRIAE_CS42_1DL_TGACv1_061722_AA0202360	1	-	-
TRIAE_CS42_1DL_TGACv1_061726_AA0202490	1	-	-
TRIAE_CS42_1DL_TGACv1_061726_AA0202510	1	WRKY	-
TRIAE_CS42_1DL_TGACv1_061746_AA0202810	1	-	-
TRIAE_CS42_1DL_TGACv1_061748_AA0202840	1	-	-
TRIAE_CS42_1DL_TGACv1_061755_AA0202900	1	-	-
TRIAE_CS42_1DL_TGACv1_061763_AA0203020	1	-	-
TRIAE_CS42_1DL_TGACv1_061766_AA0203110	1	-	-
TRIAE_CS42_1DL_TGACv1_061770_AA0203180	1	-	-
TRIAE_CS42_1DL_TGACv1_061770_AA0203190	1	-	-
TRIAE_CS42_1DL_TGACv1_061771_AA0203200	1	-	-
TRIAE_CS42_1DL_TGACv1_061780_AA0203360	1	-	-
TRIAE_CS42_1DL_TGACv1_061805_AA0203610	1	-	-
TRIAE_CS42_1DL_TGACv1_061817_AA0203820	1	-	-
TRIAE_CS42_1DL_TGACv1_061826_AA0203930	1	-	-
TRIAE_CS42_1DL_TGACv1_061830_AA0204000	1	-	-
TRIAE_CS42_1DL_TGACv1_061840_AA0204090	1	-	-
TRIAE_CS42_1DL_TGACv1_061859_AA0204470	1	-	-
TRIAE_CS42_1DL_TGACv1_061878_AA0205210	1	-	-
TRIAE_CS42_1DL_TGACv1_061880_AA0205230	1	WRKY	-
TRIAE_CS42_1DL_TGACv1_061906_AA0205470	1	-	-
TRIAE_CS42_1DL_TGACv1_061920_AA0205680	1	-	-
TRIAE_CS42_1DL_TGACv1_061931_AA0205760	1	-	-
TRIAE_CS42_1DL_TGACv1_061935_AA0205830	1	-	-
TRIAE_CS42_1DL_TGACv1_061936_AA0205840	1	-	-
TRIAE_CS42_1DL_TGACv1_061951_AA0206220	1	-	-
TRIAE_CS42_1DL_TGACv1_061954_AA0206320	1	-	-
TRIAE_CS42_1DL_TGACv1_061957_AA0206380	1	-	-
TRIAE_CS42_1DL_TGACv1_061983_AA0206840	1	-	-
TRIAE_CS42_1DL_TGACv1_061987_AA0206910	1	-	-
TRIAE_CS42_1DL_TGACv1_061987_AA0206930	1	-	-
TRIAE_CS42_1DL_TGACv1_061987_AA0206940	1	-	-
TRIAE_CS42_1DL_TGACv1_061987_AA0206950	1	-	-
TRIAE_CS42_1DL_TGACv1_062011_AA0207340	1	-	-
TRIAE_CS42_1DL_TGACv1_062026_AA0207700	1	-	-
TRIAE_CS42_1DL_TGACv1_062044_AA0208010	1	-	-
TRIAE_CS42_1DL_TGACv1_062056_AA0208130	1	-	-
TRIAE_CS42_1DL_TGACv1_062063_AA0208220	1	-	-
TRIAE_CS42_1DL_TGACv1_062065_AA0208230	1	-	-
TRIAE_CS42_1DL_TGACv1_062069_AA0208280	1	-	-
TRIAE_CS42_1DL_TGACv1_062079_AA0208440	1	-	-
TRIAE_CS42_1DL_TGACv1_062084_AA0208510	1	-	-
TRIAE_CS42_1DL_TGACv1_062105_AA0208810	1	-	-
TRIAE_CS42_1DL_TGACv1_062109_AA0208910	1	-	-
TRIAE_CS42_1DL_TGACv1_062114_AA0208970	1	-	-
TRIAE_CS42_1DL_TGACv1_062150_AA0209410	1	-	-
TRIAE_CS42_1DL_TGACv1_062154_AA0209470	1	-	-
TRIAE_CS42_1DL_TGACv1_062158_AA0209620	1	-	-
TRIAE_CS42_1DL_TGACv1_062162_AA0209690	1	-	-
TRIAE_CS42_1DL_TGACv1_062166_AA0209790	1	-	-
TRIAE_CS42_1DL_TGACv1_062183_AA0210110	1	-	-
TRIAE_CS42_1DL_TGACv1_062184_AA0210120	1	-	-
TRIAE_CS42_1DL_TGACv1_062187_AA0210180	1	-	-
TRIAE_CS42_1DL_TGACv1_062189_AA0210330	1	-	-
TRIAE_CS42_1DL_TGACv1_062190_AA0210360	1	-	-
TRIAE_CS42_1DL_TGACv1_062194_AA0210390	1	-	-
TRIAE_CS42_1DL_TGACv1_062222_AA0210760	1	-	-
TRIAE_CS42_1DL_TGACv1_062224_AA0210810	1	-	-
TRIAE_CS42_1DL_TGACv1_062226_AA0210880	1	-	-
TRIAE_CS42_1DL_TGACv1_062226_AA0210900	1	-	-
TRIAE_CS42_1DL_TGACv1_062249_AA0211290	1	-	-
TRIAE_CS42_1DL_TGACv1_062252_AA0211380	1	-	-
TRIAE_CS42_1DL_TGACv1_062273_AA0211710	1	-	-
TRIAE_CS42_1DL_TGACv1_062289_AA0211850	1	-	-
TRIAE_CS42_1DL_TGACv1_062291_AA0211860	1	-	-
TRIAE_CS42_1DL_TGACv1_062297_AA0212030	1	-	-
TRIAE_CS42_1DL_TGACv1_062300_AA0212070	1	-	-
TRIAE_CS42_1DL_TGACv1_062300_AA0212090	1	-	-
TRIAE_CS42_1DL_TGACv1_062300_AA0212100	1	-	-
TRIAE_CS42_1DL_TGACv1_062314_AA0212400	1	-	-
TRIAE_CS42_1DL_TGACv1_062315_AA0212420	1	-	-
TRIAE_CS42_1DL_TGACv1_062324_AA0212600	1	-	-
TRIAE_CS42_1DL_TGACv1_062342_AA0212890	1	-	-
TRIAE_CS42_1DL_TGACv1_062359_AA0213210	1	-	-
TRIAE_CS42_1DL_TGACv1_062405_AA0214010	1	-	-
TRIAE_CS42_1DL_TGACv1_062419_AA0214280	1	-	-
TRIAE_CS42_1DL_TGACv1_062425_AA0214340	1	-	-
TRIAE_CS42_1DL_TGACv1_062470_AA0214940	1	-	-
TRIAE_CS42_1DL_TGACv1_062477_AA0215020	1	MYB_related	-
TRIAE_CS42_1DL_TGACv1_062489_AA0215180	1	-	-
TRIAE_CS42_1DL_TGACv1_062489_AA0215190	1	-	-
TRIAE_CS42_1DL_TGACv1_062489_AA0215200	1	-	-
TRIAE_CS42_1DL_TGACv1_062493_AA0215300	1	-	-
TRIAE_CS42_1DL_TGACv1_062497_AA0215400	1	-	-
TRIAE_CS42_1DL_TGACv1_062502_AA0215520	1	-	-
TRIAE_CS42_1DL_TGACv1_062513_AA0215720	1	-	-
TRIAE_CS42_1DL_TGACv1_062529_AA0215880	1	-	-
TRIAE_CS42_1DL_TGACv1_062533_AA0215970	1	-	-
TRIAE_CS42_1DL_TGACv1_062547_AA0216250	1	-	-
TRIAE_CS42_1DL_TGACv1_062556_AA0216360	1	-	-
TRIAE_CS42_1DL_TGACv1_062561_AA0216530	1	-	-
TRIAE_CS42_1DL_TGACv1_062569_AA0216680	1	-	-
TRIAE_CS42_1DL_TGACv1_062579_AA0216820	1	-	-
TRIAE_CS42_1DL_TGACv1_062583_AA0216850	1	-	-
TRIAE_CS42_1DL_TGACv1_062585_AA0216860	1	-	-
TRIAE_CS42_1DL_TGACv1_062598_AA0217030	1	-	-
TRIAE_CS42_1DL_TGACv1_062604_AA0217160	1	-	-
TRIAE_CS42_1DL_TGACv1_062608_AA0217170	1	-	-
TRIAE_CS42_1DL_TGACv1_062613_AA0217300	1	-	-
TRIAE_CS42_1DL_TGACv1_062624_AA0217380	1	-	-
TRIAE_CS42_1DL_TGACv1_062627_AA0217440	1	MYB_related	-
TRIAE_CS42_1DL_TGACv1_062627_AA0217450	1	-	-
TRIAE_CS42_1DL_TGACv1_062633_AA0217550	1	C2H2	-
TRIAE_CS42_1DL_TGACv1_062654_AA0217860	1	GRAS	-
TRIAE_CS42_1DL_TGACv1_062706_AA0218470	1	-	-
TRIAE_CS42_1DL_TGACv1_062706_AA0218490	1	-	-
TRIAE_CS42_1DL_TGACv1_062711_AA0218590	1	-	-
TRIAE_CS42_1DL_TGACv1_062751_AA0219310	1	-	-
TRIAE_CS42_1DL_TGACv1_062756_AA0219430	1	-	-
TRIAE_CS42_1DL_TGACv1_062760_AA0219490	1	-	-
TRIAE_CS42_1DL_TGACv1_062774_AA0219640	1	-	-
TRIAE_CS42_1DL_TGACv1_062778_AA0219710	1	-	-
TRIAE_CS42_1DL_TGACv1_062805_AA0220250	1	-	-
TRIAE_CS42_1DL_TGACv1_062824_AA0220540	1	-	-
TRIAE_CS42_1DL_TGACv1_062827_AA0220630	1	ERF	-
TRIAE_CS42_1DL_TGACv1_062835_AA0220660	1	-	-
TRIAE_CS42_1DL_TGACv1_062854_AA0220990	1	-	-
TRIAE_CS42_1DL_TGACv1_062859_AA0221080	1	-	-
TRIAE_CS42_1DL_TGACv1_062860_AA0221110	1	-	-
TRIAE_CS42_1DL_TGACv1_062874_AA0221220	1	-	-
TRIAE_CS42_1DL_TGACv1_062874_AA0221230	1	-	-
TRIAE_CS42_1DL_TGACv1_062903_AA0221570	1	-	-
TRIAE_CS42_1DL_TGACv1_062908_AA0221590	1	-	-
TRIAE_CS42_1DL_TGACv1_062916_AA0221630	1	-	-
TRIAE_CS42_1DL_TGACv1_062916_AA0221650	1	-	-
TRIAE_CS42_1DL_TGACv1_062917_AA0221670	1	-	-
TRIAE_CS42_1DL_TGACv1_062927_AA0221790	1	-	-
TRIAE_CS42_1DL_TGACv1_062937_AA0221920	1	-	-
TRIAE_CS42_1DL_TGACv1_062951_AA0222050	1	-	-
TRIAE_CS42_1DL_TGACv1_062962_AA0222290	1	-	-
TRIAE_CS42_1DL_TGACv1_062975_AA0222420	1	-	-
TRIAE_CS42_1DL_TGACv1_062980_AA0222540	1	-	-
TRIAE_CS42_1DL_TGACv1_062986_AA0222620	1	-	-
TRIAE_CS42_1DL_TGACv1_062995_AA0222740	1	-	-
TRIAE_CS42_1DL_TGACv1_062999_AA0222780	1	-	-
TRIAE_CS42_1DL_TGACv1_063000_AA0222810	1	-	-
TRIAE_CS42_1DL_TGACv1_063004_AA0222860	1	-	-
TRIAE_CS42_1DL_TGACv1_063052_AA0223380	1	-	-
TRIAE_CS42_1DL_TGACv1_063075_AA0223610	1	-	-
TRIAE_CS42_1DL_TGACv1_063075_AA0223630	1	-	-
TRIAE_CS42_1DL_TGACv1_063081_AA0223730	1	-	-
TRIAE_CS42_1DL_TGACv1_063094_AA0223810	1	-	-
TRIAE_CS42_1DL_TGACv1_063111_AA0224030	1	-	-
TRIAE_CS42_1DL_TGACv1_063112_AA0224050	1	-	-
TRIAE_CS42_1DL_TGACv1_063118_AA0224150	1	-	-
TRIAE_CS42_1DL_TGACv1_063134_AA0224270	1	-	-
TRIAE_CS42_1DL_TGACv1_063143_AA0224360	1	-	-
TRIAE_CS42_1DL_TGACv1_063167_AA0224540	1	-	-
TRIAE_CS42_1DL_TGACv1_063169_AA0224560	1	bHLH	-
TRIAE_CS42_1DL_TGACv1_063179_AA0224700	1	-	-
TRIAE_CS42_1DL_TGACv1_063189_AA0224800	1	-	-
TRIAE_CS42_1DL_TGACv1_063189_AA0224810	1	-	-
TRIAE_CS42_1DL_TGACv1_063221_AA0225110	1	-	-
TRIAE_CS42_1DL_TGACv1_063225_AA0225210	1	-	-
TRIAE_CS42_1DL_TGACv1_063276_AA0225730	1	-	-
TRIAE_CS42_1DL_TGACv1_063278_AA0225800	1	-	-
TRIAE_CS42_1DL_TGACv1_063307_AA0226130	1	-	-
TRIAE_CS42_1DL_TGACv1_063307_AA0226140	1	-	-
TRIAE_CS42_1DL_TGACv1_063317_AA0226230	1	-	-
TRIAE_CS42_1DL_TGACv1_063317_AA0226240	1	-	-
TRIAE_CS42_1DL_TGACv1_063317_AA0226260	1	-	-
TRIAE_CS42_1DL_TGACv1_063317_AA0226270	1	-	-
TRIAE_CS42_1DL_TGACv1_063372_AA0226710	1	-	-
TRIAE_CS42_1DL_TGACv1_063374_AA0226760	1	-	-
TRIAE_CS42_1DL_TGACv1_063379_AA0226840	1	NAC	NAC-b
TRIAE_CS42_1DL_TGACv1_063412_AA0227060	1	-	-
TRIAE_CS42_1DL_TGACv1_063447_AA0227370	1	-	-
TRIAE_CS42_1DL_TGACv1_063462_AA0227540	1	-	-
TRIAE_CS42_1DL_TGACv1_063465_AA0227570	1	-	-
TRIAE_CS42_1DL_TGACv1_063471_AA0227590	1	-	-
TRIAE_CS42_1DL_TGACv1_063471_AA0227610	1	-	-
TRIAE_CS42_1DL_TGACv1_063480_AA0227730	1	-	-
TRIAE_CS42_1DL_TGACv1_063485_AA0227840	1	-	-
TRIAE_CS42_1DL_TGACv1_063504_AA0228000	1	-	-
TRIAE_CS42_1DL_TGACv1_063507_AA0228030	1	-	-
TRIAE_CS42_1DL_TGACv1_063516_AA0228130	1	-	-
TRIAE_CS42_1DL_TGACv1_063538_AA0228410	1	-	-
TRIAE_CS42_1DL_TGACv1_063539_AA0228440	1	-	-
TRIAE_CS42_1DL_TGACv1_063542_AA0228460	1	-	-
TRIAE_CS42_1DL_TGACv1_063563_AA0228620	1	-	-
TRIAE_CS42_1DL_TGACv1_063584_AA0228850	1	-	-
TRIAE_CS42_1DL_TGACv1_063585_AA0228880	1	-	-
TRIAE_CS42_1DL_TGACv1_063593_AA0228900	1	-	-
TRIAE_CS42_1DL_TGACv1_063618_AA0229170	1	-	-
TRIAE_CS42_1DL_TGACv1_063623_AA0229270	1	-	-
TRIAE_CS42_1DL_TGACv1_063625_AA0229300	1	RAV	-
TRIAE_CS42_1DL_TGACv1_063634_AA0229410	1	-	-
TRIAE_CS42_1DL_TGACv1_063684_AA0229850	1	-	-
TRIAE_CS42_1DL_TGACv1_063693_AA0229960	1	-	-
TRIAE_CS42_1DL_TGACv1_063702_AA0230060	1	-	-
TRIAE_CS42_1DL_TGACv1_063732_AA0230310	1	-	-
TRIAE_CS42_1DL_TGACv1_063738_AA0230370	1	-	-
TRIAE_CS42_1DL_TGACv1_063761_AA0230650	1	-	-
TRIAE_CS42_1DL_TGACv1_063776_AA0230740	1	-	-
TRIAE_CS42_1DL_TGACv1_063806_AA0231000	1	-	-
TRIAE_CS42_1DL_TGACv1_063811_AA0231050	1	-	-
TRIAE_CS42_1DL_TGACv1_063832_AA0231160	1	-	-
TRIAE_CS42_1DL_TGACv1_063836_AA0231190	1	-	-
TRIAE_CS42_1DL_TGACv1_063896_AA0231470	1	-	-
TRIAE_CS42_1DL_TGACv1_063907_AA0231660	1	-	-
TRIAE_CS42_1DL_TGACv1_063911_AA0231680	1	-	-
TRIAE_CS42_1DL_TGACv1_063964_AA0231980	1	-	-
TRIAE_CS42_1DL_TGACv1_063974_AA0232010	1	-	-
TRIAE_CS42_1DL_TGACv1_064002_AA0232070	1	-	-
TRIAE_CS42_1DL_TGACv1_064006_AA0232090	1	-	-
TRIAE_CS42_1DL_TGACv1_064013_AA0232110	1	-	-
TRIAE_CS42_1DL_TGACv1_064039_AA0232220	1	G2-like	-
TRIAE_CS42_1DL_TGACv1_064105_AA0232580	1	-	-
TRIAE_CS42_1DL_TGACv1_064126_AA0232710	1	-	-
TRIAE_CS42_1DL_TGACv1_064143_AA0232860	1	-	-
TRIAE_CS42_1DL_TGACv1_064144_AA0232890	1	-	-
TRIAE_CS42_1DL_TGACv1_064161_AA0232960	1	-	-
TRIAE_CS42_1DL_TGACv1_064161_AA0232970	1	-	-
TRIAE_CS42_1DL_TGACv1_064163_AA0233000	1	NAC	NAC-e
TRIAE_CS42_1DL_TGACv1_064188_AA0233130	1	-	-
TRIAE_CS42_1DL_TGACv1_064201_AA0233200	1	-	-
TRIAE_CS42_1DL_TGACv1_064237_AA0233380	1	-	-
TRIAE_CS42_1DL_TGACv1_064278_AA0233720	1	-	-
TRIAE_CS42_1DL_TGACv1_064387_AA0234180	1	-	-
TRIAE_CS42_1DL_TGACv1_064387_AA0234190	1	-	-
TRIAE_CS42_1DL_TGACv1_064398_AA0234260	1	-	-
TRIAE_CS42_1DL_TGACv1_064628_AA0235190	1	-	-
TRIAE_CS42_1DL_TGACv1_064661_AA0235290	1	-	-
TRIAE_CS42_1DL_TGACv1_064677_AA0235340	1	-	-
TRIAE_CS42_1DL_TGACv1_064695_AA0235400	1	-	-
TRIAE_CS42_1DL_TGACv1_064760_AA0235620	1	-	-
TRIAE_CS42_1DL_TGACv1_064760_AA0235630	1	-	-
TRIAE_CS42_1DL_TGACv1_064981_AA0236360	1	-	-
TRIAE_CS42_1DL_TGACv1_065126_AA0236600	1	-	-
TRIAE_CS42_1DL_TGACv1_065188_AA0236670	1	-	-
TRIAE_CS42_1DL_TGACv1_065447_AA0237110	1	-	-
TRIAE_CS42_1DL_TGACv1_065590_AA0237250	1	-	-
TRIAE_CS42_1DL_TGACv1_068752_AA0238420	1	-	-
TRIAE_CS42_1DS_TGACv1_080104_AA0239190	1	-	-
TRIAE_CS42_1DS_TGACv1_080107_AA0239320	1	-	-
TRIAE_CS42_1DS_TGACv1_080107_AA0239360	1	-	-
TRIAE_CS42_1DS_TGACv1_080112_AA0239820	1	-	-
TRIAE_CS42_1DS_TGACv1_080112_AA0239830	1	-	-
TRIAE_CS42_1DS_TGACv1_080119_AA0240170	1	-	-
TRIAE_CS42_1DS_TGACv1_080126_AA0240510	1	-	-
TRIAE_CS42_1DS_TGACv1_080126_AA0240630	1	-	-
TRIAE_CS42_1DS_TGACv1_080131_AA0240850	1	-	-
TRIAE_CS42_1DS_TGACv1_080133_AA0240930	1	-	-
TRIAE_CS42_1DS_TGACv1_080150_AA0241510	1	-	-
TRIAE_CS42_1DS_TGACv1_080151_AA0241540	1	-	-
TRIAE_CS42_1DS_TGACv1_080155_AA0241650	1	-	-
TRIAE_CS42_1DS_TGACv1_080159_AA0241850	1	-	-
TRIAE_CS42_1DS_TGACv1_080167_AA0242070	1	-	-
TRIAE_CS42_1DS_TGACv1_080170_AA0242120	1	-	-
TRIAE_CS42_1DS_TGACv1_080174_AA0242300	1	-	-
TRIAE_CS42_1DS_TGACv1_080186_AA0242420	1	-	-
TRIAE_CS42_1DS_TGACv1_080190_AA0242530	1	-	-
TRIAE_CS42_1DS_TGACv1_080190_AA0242540	1	-	-
TRIAE_CS42_1DS_TGACv1_080190_AA0242550	1	-	-
TRIAE_CS42_1DS_TGACv1_080190_AA0242570	1	-	-
TRIAE_CS42_1DS_TGACv1_080190_AA0242630	1	-	-
TRIAE_CS42_1DS_TGACv1_080197_AA0242930	1	-	-
TRIAE_CS42_1DS_TGACv1_080201_AA0243010	1	-	-
TRIAE_CS42_1DS_TGACv1_080202_AA0243100	1	-	-
TRIAE_CS42_1DS_TGACv1_080206_AA0243120	1	-	-
TRIAE_CS42_1DS_TGACv1_080209_AA0243170	1	WRKY	-
TRIAE_CS42_1DS_TGACv1_080216_AA0243400	1	-	-
TRIAE_CS42_1DS_TGACv1_080245_AA0244140	1	-	-
TRIAE_CS42_1DS_TGACv1_080256_AA0244420	1	-	-
TRIAE_CS42_1DS_TGACv1_080256_AA0244440	1	-	-
TRIAE_CS42_1DS_TGACv1_080259_AA0244550	1	-	-
TRIAE_CS42_1DS_TGACv1_080270_AA0244820	1	-	-
TRIAE_CS42_1DS_TGACv1_080270_AA0244910	1	-	-
TRIAE_CS42_1DS_TGACv1_080282_AA0245040	1	-	-
TRIAE_CS42_1DS_TGACv1_080283_AA0245110	1	GRAS	-
TRIAE_CS42_1DS_TGACv1_080285_AA0245180	1	-	-
TRIAE_CS42_1DS_TGACv1_080295_AA0245480	1	Dof	-
TRIAE_CS42_1DS_TGACv1_080347_AA0246370	1	-	-
TRIAE_CS42_1DS_TGACv1_080355_AA0246530	1	-	-
TRIAE_CS42_1DS_TGACv1_080394_AA0247270	1	-	-
TRIAE_CS42_1DS_TGACv1_080396_AA0247300	1	-	-
TRIAE_CS42_1DS_TGACv1_080410_AA0247470	1	-	-
TRIAE_CS42_1DS_TGACv1_080414_AA0247520	1	-	-
TRIAE_CS42_1DS_TGACv1_080417_AA0247570	1	-	-
TRIAE_CS42_1DS_TGACv1_080431_AA0247810	1	-	-
TRIAE_CS42_1DS_TGACv1_080445_AA0248050	1	-	-
TRIAE_CS42_1DS_TGACv1_080446_AA0248080	1	-	-
TRIAE_CS42_1DS_TGACv1_080446_AA0248090	1	-	-
TRIAE_CS42_1DS_TGACv1_080451_AA0248270	1	-	-
TRIAE_CS42_1DS_TGACv1_080485_AA0248830	1	-	-
TRIAE_CS42_1DS_TGACv1_080485_AA0248850	1	-	-
TRIAE_CS42_1DS_TGACv1_080503_AA0249190	1	-	-
TRIAE_CS42_1DS_TGACv1_080505_AA0249220	1	-	-
TRIAE_CS42_1DS_TGACv1_080511_AA0249300	1	-	-
TRIAE_CS42_1DS_TGACv1_080515_AA0249340	1	-	-
TRIAE_CS42_1DS_TGACv1_080519_AA0249440	1	-	-
TRIAE_CS42_1DS_TGACv1_080521_AA0249490	1	-	-
TRIAE_CS42_1DS_TGACv1_080552_AA0249990	1	-	-
TRIAE_CS42_1DS_TGACv1_080575_AA0250400	1	-	-
TRIAE_CS42_1DS_TGACv1_080580_AA0250530	1	-	-
TRIAE_CS42_1DS_TGACv1_080610_AA0250970	1	-	-
TRIAE_CS42_1DS_TGACv1_080616_AA0251020	1	-	-
TRIAE_CS42_1DS_TGACv1_080616_AA0251030	1	-	-
TRIAE_CS42_1DS_TGACv1_080618_AA0251110	1	-	-
TRIAE_CS42_1DS_TGACv1_080641_AA0251460	1	-	-
TRIAE_CS42_1DS_TGACv1_080658_AA0251730	1	-	-
TRIAE_CS42_1DS_TGACv1_080659_AA0251770	1	-	-
TRIAE_CS42_1DS_TGACv1_080665_AA0251930	1	-	-
TRIAE_CS42_1DS_TGACv1_080666_AA0251980	1	-	-
TRIAE_CS42_1DS_TGACv1_080675_AA0252190	1	-	-
TRIAE_CS42_1DS_TGACv1_080697_AA0252340	1	WRKY	-
TRIAE_CS42_1DS_TGACv1_080729_AA0252890	1	MYB	-
TRIAE_CS42_1DS_TGACv1_080750_AA0253240	1	-	-
TRIAE_CS42_1DS_TGACv1_080760_AA0253360	1	-	-
TRIAE_CS42_1DS_TGACv1_080771_AA0253500	1	-	-
TRIAE_CS42_1DS_TGACv1_080771_AA0253510	1	-	-
TRIAE_CS42_1DS_TGACv1_080778_AA0253620	1	-	-
TRIAE_CS42_1DS_TGACv1_080781_AA0253680	1	-	-
TRIAE_CS42_1DS_TGACv1_080821_AA0254110	1	-	-
TRIAE_CS42_1DS_TGACv1_080824_AA0254180	1	-	-
TRIAE_CS42_1DS_TGACv1_080841_AA0254480	1	-	-
TRIAE_CS42_1DS_TGACv1_080850_AA0254640	1	-	-
TRIAE_CS42_1DS_TGACv1_080871_AA0254990	1	-	-
TRIAE_CS42_1DS_TGACv1_080917_AA0255520	1	-	-
TRIAE_CS42_1DS_TGACv1_080935_AA0255840	1	-	-
TRIAE_CS42_1DS_TGACv1_080938_AA0255880	1	-	-
TRIAE_CS42_1DS_TGACv1_080964_AA0256130	1	-	-
TRIAE_CS42_1DS_TGACv1_080965_AA0256150	1	-	-
TRIAE_CS42_1DS_TGACv1_080969_AA0256210	1	-	-
TRIAE_CS42_1DS_TGACv1_080973_AA0256310	1	-	-
TRIAE_CS42_1DS_TGACv1_080999_AA0256610	1	-	-
TRIAE_CS42_1DS_TGACv1_081068_AA0257380	1	-	-
TRIAE_CS42_1DS_TGACv1_081068_AA0257390	1	-	-
TRIAE_CS42_1DS_TGACv1_081079_AA0257520	1	-	-
TRIAE_CS42_1DS_TGACv1_081139_AA0257960	1	-	-
TRIAE_CS42_1DS_TGACv1_081145_AA0258010	1	-	-
TRIAE_CS42_1DS_TGACv1_081158_AA0258160	1	-	-
TRIAE_CS42_1DS_TGACv1_081176_AA0258360	1	-	-
TRIAE_CS42_1DS_TGACv1_081195_AA0258600	1	-	-
TRIAE_CS42_1DS_TGACv1_081234_AA0259010	1	-	-
TRIAE_CS42_1DS_TGACv1_081265_AA0259360	1	-	-
TRIAE_CS42_1DS_TGACv1_081280_AA0259510	1	-	-
TRIAE_CS42_1DS_TGACv1_081292_AA0259590	1	-	-
TRIAE_CS42_1DS_TGACv1_081310_AA0259700	1	-	-
TRIAE_CS42_1DS_TGACv1_081311_AA0259730	1	-	-
TRIAE_CS42_1DS_TGACv1_081312_AA0259740	1	C3H	-
TRIAE_CS42_1DS_TGACv1_081324_AA0259880	1	-	-
TRIAE_CS42_1DS_TGACv1_081370_AA0260280	1	-	-
TRIAE_CS42_1DS_TGACv1_081377_AA0260340	1	-	-
TRIAE_CS42_1DS_TGACv1_081382_AA0260380	1	-	-
TRIAE_CS42_1DS_TGACv1_081418_AA0260620	1	-	-
TRIAE_CS42_1DS_TGACv1_081449_AA0260740	1	-	-
TRIAE_CS42_1DS_TGACv1_081498_AA0261110	1	-	-
TRIAE_CS42_1DS_TGACv1_081600_AA0261820	1	-	-
TRIAE_CS42_1DS_TGACv1_081780_AA0262690	1	-	-
TRIAE_CS42_1DS_TGACv1_081787_AA0262730	1	-	-
TRIAE_CS42_1DS_TGACv1_081843_AA0262970	1	-	-
TRIAE_CS42_1DS_TGACv1_081860_AA0263060	1	-	-
TRIAE_CS42_1DS_TGACv1_081885_AA0263200	1	-	-
TRIAE_CS42_1DS_TGACv1_082101_AA0263800	1	-	-
TRIAE_CS42_1DS_TGACv1_082113_AA0263850	1	-	-
TRIAE_CS42_1DS_TGACv1_082185_AA0264070	1	-	-
TRIAE_CS42_1DS_TGACv1_082262_AA0264290	1	-	-
TRIAE_CS42_1DS_TGACv1_082276_AA0264330	1	-	-
TRIAE_CS42_1DS_TGACv1_082535_AA0264750	1	-	-
TRIAE_CS42_1DS_TGACv1_082888_AA0265110	1	-	-
TRIAE_CS42_1DS_TGACv1_082951_AA0265130	1	C2H2	-
TRIAE_CS42_1DS_TGACv1_084146_AA0265390	1	-	-
TRIAE_CS42_2AL_TGACv1_092893_AA0266360	1	-	-
TRIAE_CS42_2AL_TGACv1_092899_AA0266500	1	-	-
TRIAE_CS42_2AL_TGACv1_092905_AA0266710	1	-	-
TRIAE_CS42_2AL_TGACv1_092909_AA0266780	1	-	-
TRIAE_CS42_2AL_TGACv1_092917_AA0267030	1	-	-
TRIAE_CS42_2AL_TGACv1_092923_AA0267160	1	-	-
TRIAE_CS42_2AL_TGACv1_092926_AA0267290	1	-	-
TRIAE_CS42_2AL_TGACv1_092944_AA0267600	1	-	-
TRIAE_CS42_2AL_TGACv1_092944_AA0267720	1	-	-
TRIAE_CS42_2AL_TGACv1_092960_AA0268060	1	-	-
TRIAE_CS42_2AL_TGACv1_092977_AA0268440	1	-	-
TRIAE_CS42_2AL_TGACv1_092982_AA0268590	1	-	-
TRIAE_CS42_2AL_TGACv1_092986_AA0268690	1	-	-
TRIAE_CS42_2AL_TGACv1_092986_AA0268720	1	-	-
TRIAE_CS42_2AL_TGACv1_092986_AA0268740	1	-	-
TRIAE_CS42_2AL_TGACv1_092987_AA0268790	1	-	-
TRIAE_CS42_2AL_TGACv1_092989_AA0268900	1	MYB	-
TRIAE_CS42_2AL_TGACv1_092992_AA0268960	1	-	-
TRIAE_CS42_2AL_TGACv1_093000_AA0269160	1	B3	-
TRIAE_CS42_2AL_TGACv1_093016_AA0269550	1	-	-
TRIAE_CS42_2AL_TGACv1_093024_AA0269660	1	-	-
TRIAE_CS42_2AL_TGACv1_093025_AA0269740	1	-	-
TRIAE_CS42_2AL_TGACv1_093025_AA0269750	1	-	-
TRIAE_CS42_2AL_TGACv1_093025_AA0269770	1	-	-
TRIAE_CS42_2AL_TGACv1_093032_AA0269970	1	-	-
TRIAE_CS42_2AL_TGACv1_093045_AA0270200	1	-	-
TRIAE_CS42_2AL_TGACv1_093058_AA0270780	1	-	-
TRIAE_CS42_2AL_TGACv1_093072_AA0271230	1	-	-
TRIAE_CS42_2AL_TGACv1_093074_AA0271300	1	-	-
TRIAE_CS42_2AL_TGACv1_093077_AA0271330	1	-	-
TRIAE_CS42_2AL_TGACv1_093081_AA0271360	1	-	-
TRIAE_CS42_2AL_TGACv1_093084_AA0271520	1	-	-
TRIAE_CS42_2AL_TGACv1_093093_AA0271850	1	-	-
TRIAE_CS42_2AL_TGACv1_093096_AA0271950	1	-	-
TRIAE_CS42_2AL_TGACv1_093101_AA0272020	1	-	-
TRIAE_CS42_2AL_TGACv1_093119_AA0272420	1	-	-
TRIAE_CS42_2AL_TGACv1_093126_AA0272710	1	-	-
TRIAE_CS42_2AL_TGACv1_093126_AA0272780	1	-	-
TRIAE_CS42_2AL_TGACv1_093136_AA0272950	1	-	-
TRIAE_CS42_2AL_TGACv1_093138_AA0273030	1	-	-
TRIAE_CS42_2AL_TGACv1_093139_AA0273060	1	-	-
TRIAE_CS42_2AL_TGACv1_093143_AA0273200	1	-	-
TRIAE_CS42_2AL_TGACv1_093159_AA0273550	1	-	-
TRIAE_CS42_2AL_TGACv1_093159_AA0273650	1	-	-
TRIAE_CS42_2AL_TGACv1_093163_AA0273770	1	ERF	-
TRIAE_CS42_2AL_TGACv1_093177_AA0274140	1	-	-
TRIAE_CS42_2AL_TGACv1_093177_AA0274160	1	WRKY	-
TRIAE_CS42_2AL_TGACv1_093186_AA0274440	1	-	-
TRIAE_CS42_2AL_TGACv1_093196_AA0274820	1	-	-
TRIAE_CS42_2AL_TGACv1_093196_AA0274840	1	-	-
TRIAE_CS42_2AL_TGACv1_093196_AA0274850	1	-	-
TRIAE_CS42_2AL_TGACv1_093198_AA0274960	1	-	-
TRIAE_CS42_2AL_TGACv1_093221_AA0275340	1	-	-
TRIAE_CS42_2AL_TGACv1_093231_AA0275570	1	Dof	-
TRIAE_CS42_2AL_TGACv1_093247_AA0275880	1	-	-
TRIAE_CS42_2AL_TGACv1_093252_AA0275930	1	-	-
TRIAE_CS42_2AL_TGACv1_093261_AA0276060	1	-	-
TRIAE_CS42_2AL_TGACv1_093266_AA0276090	1	-	-
TRIAE_CS42_2AL_TGACv1_093272_AA0276380	1	-	-
TRIAE_CS42_2AL_TGACv1_093272_AA0276390	1	-	-
TRIAE_CS42_2AL_TGACv1_093287_AA0276710	1	-	-
TRIAE_CS42_2AL_TGACv1_093291_AA0276750	1	-	-
TRIAE_CS42_2AL_TGACv1_093291_AA0276770	1	LBD	-
TRIAE_CS42_2AL_TGACv1_093299_AA0276920	1	-	-
TRIAE_CS42_2AL_TGACv1_093319_AA0277310	1	-	-
TRIAE_CS42_2AL_TGACv1_093322_AA0277490	1	G2-like	-
TRIAE_CS42_2AL_TGACv1_093323_AA0277500	1	-	-
TRIAE_CS42_2AL_TGACv1_093325_AA0277700	1	-	-
TRIAE_CS42_2AL_TGACv1_093330_AA0277780	1	-	-
TRIAE_CS42_2AL_TGACv1_093330_AA0277810	1	-	-
TRIAE_CS42_2AL_TGACv1_093333_AA0277870	1	-	-
TRIAE_CS42_2AL_TGACv1_093335_AA0277920	1	-	-
TRIAE_CS42_2AL_TGACv1_093342_AA0278060	1	-	-
TRIAE_CS42_2AL_TGACv1_093360_AA0278520	1	-	-
TRIAE_CS42_2AL_TGACv1_093363_AA0278560	1	-	-
TRIAE_CS42_2AL_TGACv1_093366_AA0278580	1	-	-
TRIAE_CS42_2AL_TGACv1_093381_AA0278900	1	-	-
TRIAE_CS42_2AL_TGACv1_093387_AA0279050	1	-	-
TRIAE_CS42_2AL_TGACv1_093393_AA0279170	1	-	-
TRIAE_CS42_2AL_TGACv1_093394_AA0279200	1	-	-
TRIAE_CS42_2AL_TGACv1_093395_AA0279210	1	-	-
TRIAE_CS42_2AL_TGACv1_093400_AA0279360	1	-	-
TRIAE_CS42_2AL_TGACv1_093421_AA0279850	1	-	-
TRIAE_CS42_2AL_TGACv1_093422_AA0279890	1	-	-
TRIAE_CS42_2AL_TGACv1_093447_AA0280270	1	-	-
TRIAE_CS42_2AL_TGACv1_093450_AA0280340	1	-	-
TRIAE_CS42_2AL_TGACv1_093484_AA0280980	1	-	-
TRIAE_CS42_2AL_TGACv1_093485_AA0281020	1	-	-
TRIAE_CS42_2AL_TGACv1_093489_AA0281070	1	-	-
TRIAE_CS42_2AL_TGACv1_093489_AA0281080	1	-	-
TRIAE_CS42_2AL_TGACv1_093504_AA0281380	1	-	-
TRIAE_CS42_2AL_TGACv1_093504_AA0281400	1	-	-
TRIAE_CS42_2AL_TGACv1_093509_AA0281460	1	NF-YB	-
TRIAE_CS42_2AL_TGACv1_093509_AA0281500	1	-	-
TRIAE_CS42_2AL_TGACv1_093527_AA0281800	1	NAC	NAC-c
TRIAE_CS42_2AL_TGACv1_093527_AA0281830	1	NAC	NAC-c
TRIAE_CS42_2AL_TGACv1_093545_AA0282360	1	-	-
TRIAE_CS42_2AL_TGACv1_093580_AA0282970	1	-	-
TRIAE_CS42_2AL_TGACv1_093585_AA0283230	1	-	-
TRIAE_CS42_2AL_TGACv1_093599_AA0283490	1	-	-
TRIAE_CS42_2AL_TGACv1_093600_AA0283500	1	-	-
TRIAE_CS42_2AL_TGACv1_093617_AA0283690	1	-	-
TRIAE_CS42_2AL_TGACv1_093621_AA0283810	1	-	-
TRIAE_CS42_2AL_TGACv1_093624_AA0283900	1	-	-
TRIAE_CS42_2AL_TGACv1_093630_AA0284040	1	-	-
TRIAE_CS42_2AL_TGACv1_093650_AA0284590	1	-	-
TRIAE_CS42_2AL_TGACv1_093656_AA0284640	1	-	-
TRIAE_CS42_2AL_TGACv1_093659_AA0284730	1	-	-
TRIAE_CS42_2AL_TGACv1_093662_AA0284820	1	-	-
TRIAE_CS42_2AL_TGACv1_093664_AA0284830	1	-	-
TRIAE_CS42_2AL_TGACv1_093665_AA0284900	1	-	-
TRIAE_CS42_2AL_TGACv1_093684_AA0285140	1	-	-
TRIAE_CS42_2AL_TGACv1_093686_AA0285150	1	-	-
TRIAE_CS42_2AL_TGACv1_093732_AA0285770	1	-	-
TRIAE_CS42_2AL_TGACv1_093747_AA0285930	1	-	-
TRIAE_CS42_2AL_TGACv1_093747_AA0285950	1	-	-
TRIAE_CS42_2AL_TGACv1_093757_AA0286130	1	-	-
TRIAE_CS42_2AL_TGACv1_093758_AA0286200	1	-	-
TRIAE_CS42_2AL_TGACv1_093764_AA0286310	1	-	-
TRIAE_CS42_2AL_TGACv1_093773_AA0286450	1	-	-
TRIAE_CS42_2AL_TGACv1_093786_AA0286710	1	-	-
TRIAE_CS42_2AL_TGACv1_093791_AA0286760	1	-	-
TRIAE_CS42_2AL_TGACv1_093793_AA0286790	1	-	-
TRIAE_CS42_2AL_TGACv1_093793_AA0286810	1	-	-
TRIAE_CS42_2AL_TGACv1_093797_AA0286890	1	-	-
TRIAE_CS42_2AL_TGACv1_093797_AA0286900	1	-	-
TRIAE_CS42_2AL_TGACv1_093797_AA0286910	1	-	-
TRIAE_CS42_2AL_TGACv1_093797_AA0286920	1	-	-
TRIAE_CS42_2AL_TGACv1_093797_AA0286930	1	-	-
TRIAE_CS42_2AL_TGACv1_093800_AA0287000	1	-	-
TRIAE_CS42_2AL_TGACv1_093800_AA0287010	1	-	-
TRIAE_CS42_2AL_TGACv1_093808_AA0287220	1	-	-
TRIAE_CS42_2AL_TGACv1_093821_AA0287480	1	-	-
TRIAE_CS42_2AL_TGACv1_093846_AA0288050	1	-	-
TRIAE_CS42_2AL_TGACv1_093864_AA0288390	1	-	-
TRIAE_CS42_2AL_TGACv1_093891_AA0288810	1	-	-
TRIAE_CS42_2AL_TGACv1_093901_AA0288960	1	-	-
TRIAE_CS42_2AL_TGACv1_093902_AA0288980	1	-	-
TRIAE_CS42_2AL_TGACv1_093902_AA0288990	1	-	-
TRIAE_CS42_2AL_TGACv1_093902_AA0289020	1	-	-
TRIAE_CS42_2AL_TGACv1_093911_AA0289230	1	-	-
TRIAE_CS42_2AL_TGACv1_093911_AA0289240	1	-	-
TRIAE_CS42_2AL_TGACv1_093912_AA0289270	1	-	-
TRIAE_CS42_2AL_TGACv1_093928_AA0289550	1	-	-
TRIAE_CS42_2AL_TGACv1_093928_AA0289570	1	-	-
TRIAE_CS42_2AL_TGACv1_093931_AA0289630	1	-	-
TRIAE_CS42_2AL_TGACv1_093937_AA0289660	1	-	-
TRIAE_CS42_2AL_TGACv1_093937_AA0289680	1	-	-
TRIAE_CS42_2AL_TGACv1_093944_AA0289790	1	GATA	-
TRIAE_CS42_2AL_TGACv1_093948_AA0289900	1	-	-
TRIAE_CS42_2AL_TGACv1_093952_AA0290090	1	-	-
TRIAE_CS42_2AL_TGACv1_093975_AA0290490	1	-	-
TRIAE_CS42_2AL_TGACv1_093976_AA0290520	1	-	-
TRIAE_CS42_2AL_TGACv1_093994_AA0290870	1	-	-
TRIAE_CS42_2AL_TGACv1_093994_AA0290890	1	-	-
TRIAE_CS42_2AL_TGACv1_094005_AA0291050	1	-	-
TRIAE_CS42_2AL_TGACv1_094017_AA0291140	1	-	-
TRIAE_CS42_2AL_TGACv1_094030_AA0291340	1	-	-
TRIAE_CS42_2AL_TGACv1_094067_AA0292020	1	-	-
TRIAE_CS42_2AL_TGACv1_094068_AA0292060	1	-	-
TRIAE_CS42_2AL_TGACv1_094077_AA0292200	1	-	-
TRIAE_CS42_2AL_TGACv1_094081_AA0292290	1	-	-
TRIAE_CS42_2AL_TGACv1_094081_AA0292300	1	MIKC	-
TRIAE_CS42_2AL_TGACv1_094092_AA0292440	1	-	-
TRIAE_CS42_2AL_TGACv1_094098_AA0292530	1	-	-
TRIAE_CS42_2AL_TGACv1_094098_AA0292540	1	-	-
TRIAE_CS42_2AL_TGACv1_094099_AA0292580	1	NAC	NAC-g
TRIAE_CS42_2AL_TGACv1_094103_AA0292640	1	-	-
TRIAE_CS42_2AL_TGACv1_094103_AA0292650	1	-	-
TRIAE_CS42_2AL_TGACv1_094103_AA0292660	1	-	-
TRIAE_CS42_2AL_TGACv1_094118_AA0292780	1	-	-
TRIAE_CS42_2AL_TGACv1_094121_AA0292820	1	-	-
TRIAE_CS42_2AL_TGACv1_094127_AA0292990	1	-	-
TRIAE_CS42_2AL_TGACv1_094127_AA0293000	1	-	-
TRIAE_CS42_2AL_TGACv1_094128_AA0293020	1	-	-
TRIAE_CS42_2AL_TGACv1_094144_AA0293250	1	-	-
TRIAE_CS42_2AL_TGACv1_094147_AA0293310	1	-	-
TRIAE_CS42_2AL_TGACv1_094147_AA0293320	1	-	-
TRIAE_CS42_2AL_TGACv1_094156_AA0293450	1	-	-
TRIAE_CS42_2AL_TGACv1_094156_AA0293460	1	-	-
TRIAE_CS42_2AL_TGACv1_094165_AA0293570	1	-	-
TRIAE_CS42_2AL_TGACv1_094170_AA0293650	1	-	-
TRIAE_CS42_2AL_TGACv1_094175_AA0293690	1	-	-
TRIAE_CS42_2AL_TGACv1_094178_AA0293870	1	-	-
TRIAE_CS42_2AL_TGACv1_094179_AA0293890	1	-	-
TRIAE_CS42_2AL_TGACv1_094216_AA0294620	1	-	-
TRIAE_CS42_2AL_TGACv1_094218_AA0294690	1	-	-
TRIAE_CS42_2AL_TGACv1_094228_AA0294830	1	-	-
TRIAE_CS42_2AL_TGACv1_094246_AA0294970	1	GATA	-
TRIAE_CS42_2AL_TGACv1_094248_AA0294990	1	-	-
TRIAE_CS42_2AL_TGACv1_094255_AA0295010	1	-	-
TRIAE_CS42_2AL_TGACv1_094281_AA0295170	1	-	-
TRIAE_CS42_2AL_TGACv1_094311_AA0295590	1	-	-
TRIAE_CS42_2AL_TGACv1_094332_AA0295910	1	C2H2	-
TRIAE_CS42_2AL_TGACv1_094336_AA0296020	1	-	-
TRIAE_CS42_2AL_TGACv1_094342_AA0296160	1	-	-
TRIAE_CS42_2AL_TGACv1_094352_AA0296320	1	-	-
TRIAE_CS42_2AL_TGACv1_094352_AA0296330	1	-	-
TRIAE_CS42_2AL_TGACv1_094393_AA0297010	1	-	-
TRIAE_CS42_2AL_TGACv1_094412_AA0297250	1	-	-
TRIAE_CS42_2AL_TGACv1_094434_AA0297520	1	-	-
TRIAE_CS42_2AL_TGACv1_094435_AA0297540	1	DBB	-
TRIAE_CS42_2AL_TGACv1_094444_AA0297600	1	WRKY	-
TRIAE_CS42_2AL_TGACv1_094475_AA0298430	1	-	-
TRIAE_CS42_2AL_TGACv1_094478_AA0298460	1	-	-
TRIAE_CS42_2AL_TGACv1_094478_AA0298480	1	-	-
TRIAE_CS42_2AL_TGACv1_094480_AA0298530	1	-	-
TRIAE_CS42_2AL_TGACv1_094481_AA0298560	1	-	-
TRIAE_CS42_2AL_TGACv1_094486_AA0298620	1	-	-
TRIAE_CS42_2AL_TGACv1_094486_AA0298630	1	-	-
TRIAE_CS42_2AL_TGACv1_094519_AA0299110	1	-	-
TRIAE_CS42_2AL_TGACv1_094522_AA0299120	1	Trihelix	-
TRIAE_CS42_2AL_TGACv1_094524_AA0299170	1	-	-
TRIAE_CS42_2AL_TGACv1_094526_AA0299210	1	-	-
TRIAE_CS42_2AL_TGACv1_094526_AA0299230	1	-	-
TRIAE_CS42_2AL_TGACv1_094530_AA0299290	1	-	-
TRIAE_CS42_2AL_TGACv1_094539_AA0299430	1	-	-
TRIAE_CS42_2AL_TGACv1_094549_AA0299530	1	ERF	-
TRIAE_CS42_2AL_TGACv1_094574_AA0299820	1	Dof	-
TRIAE_CS42_2AL_TGACv1_094578_AA0299860	1	-	-
TRIAE_CS42_2AL_TGACv1_094581_AA0299910	1	-	-
TRIAE_CS42_2AL_TGACv1_094593_AA0300040	1	-	-
TRIAE_CS42_2AL_TGACv1_094593_AA0300050	1	-	-
TRIAE_CS42_2AL_TGACv1_094598_AA0300220	1	-	-
TRIAE_CS42_2AL_TGACv1_094607_AA0300420	1	-	-
TRIAE_CS42_2AL_TGACv1_094608_AA0300450	1	-	-
TRIAE_CS42_2AL_TGACv1_094615_AA0300590	1	-	-
TRIAE_CS42_2AL_TGACv1_094627_AA0300840	1	-	-
TRIAE_CS42_2AL_TGACv1_094676_AA0301320	1	-	-
TRIAE_CS42_2AL_TGACv1_094683_AA0301390	1	-	-
TRIAE_CS42_2AL_TGACv1_094687_AA0301480	1	-	-
TRIAE_CS42_2AL_TGACv1_094688_AA0301540	1	-	-
TRIAE_CS42_2AL_TGACv1_094692_AA0301640	1	-	-
TRIAE_CS42_2AL_TGACv1_094704_AA0301770	1	-	-
TRIAE_CS42_2AL_TGACv1_094709_AA0301890	1	-	-
TRIAE_CS42_2AL_TGACv1_094712_AA0301940	1	-	-
TRIAE_CS42_2AL_TGACv1_094731_AA0302280	1	-	-
TRIAE_CS42_2AL_TGACv1_094738_AA0302360	1	-	-
TRIAE_CS42_2AL_TGACv1_094743_AA0302410	1	-	-
TRIAE_CS42_2AL_TGACv1_094745_AA0302490	1	-	-
TRIAE_CS42_2AL_TGACv1_094756_AA0302660	1	-	-
TRIAE_CS42_2AL_TGACv1_094797_AA0303310	1	-	-
TRIAE_CS42_2AL_TGACv1_094885_AA0304530	1	-	-
TRIAE_CS42_2AL_TGACv1_094888_AA0304620	1	-	-
TRIAE_CS42_2AL_TGACv1_094920_AA0304840	1	-	-
TRIAE_CS42_2AL_TGACv1_094922_AA0304900	1	-	-
TRIAE_CS42_2AL_TGACv1_094924_AA0304930	1	-	-
TRIAE_CS42_2AL_TGACv1_094953_AA0305190	1	-	-
TRIAE_CS42_2AL_TGACv1_094969_AA0305350	1	-	-
TRIAE_CS42_2AL_TGACv1_094969_AA0305370	1	-	-
TRIAE_CS42_2AL_TGACv1_094975_AA0305450	1	-	-
TRIAE_CS42_2AL_TGACv1_094976_AA0305510	1	-	-
TRIAE_CS42_2AL_TGACv1_095024_AA0305990	1	bHLH	-
TRIAE_CS42_2AL_TGACv1_095025_AA0306080	1	-	-
TRIAE_CS42_2AL_TGACv1_095026_AA0306120	1	-	-
TRIAE_CS42_2AL_TGACv1_095054_AA0306460	1	-	-
TRIAE_CS42_2AL_TGACv1_095065_AA0306510	1	-	-
TRIAE_CS42_2AL_TGACv1_095069_AA0306550	1	-	-
TRIAE_CS42_2AL_TGACv1_095098_AA0306860	1	-	-
TRIAE_CS42_2AL_TGACv1_095099_AA0306910	1	-	-
TRIAE_CS42_2AL_TGACv1_095116_AA0307060	1	-	-
TRIAE_CS42_2AL_TGACv1_095117_AA0307140	1	-	-
TRIAE_CS42_2AL_TGACv1_095145_AA0307420	1	-	-
TRIAE_CS42_2AL_TGACv1_095148_AA0307490	1	-	-
TRIAE_CS42_2AL_TGACv1_095158_AA0307540	1	HD-ZIP	-
TRIAE_CS42_2AL_TGACv1_095163_AA0307640	1	-	-
TRIAE_CS42_2AL_TGACv1_095163_AA0307690	1	-	-
TRIAE_CS42_2AL_TGACv1_095175_AA0307800	1	-	-
TRIAE_CS42_2AL_TGACv1_095185_AA0307880	1	-	-
TRIAE_CS42_2AL_TGACv1_095187_AA0308030	1	-	-
TRIAE_CS42_2AL_TGACv1_095195_AA0308190	1	-	-
TRIAE_CS42_2AL_TGACv1_095197_AA0308230	1	-	-
TRIAE_CS42_2AL_TGACv1_095259_AA0308780	1	-	-
TRIAE_CS42_2AL_TGACv1_095265_AA0308920	1	-	-
TRIAE_CS42_2AL_TGACv1_095268_AA0308970	1	-	-
TRIAE_CS42_2AL_TGACv1_095290_AA0309110	1	-	-
TRIAE_CS42_2AL_TGACv1_095292_AA0309150	1	-	-
TRIAE_CS42_2AL_TGACv1_095320_AA0309580	1	-	-
TRIAE_CS42_2AL_TGACv1_095348_AA0309770	1	-	-
TRIAE_CS42_2AL_TGACv1_095363_AA0309980	1	-	-
TRIAE_CS42_2AL_TGACv1_095370_AA0310060	1	-	-
TRIAE_CS42_2AL_TGACv1_095372_AA0310150	1	-	-
TRIAE_CS42_2AL_TGACv1_095386_AA0310290	1	-	-
TRIAE_CS42_2AL_TGACv1_095400_AA0310460	1	-	-
TRIAE_CS42_2AL_TGACv1_095400_AA0310480	1	-	-
TRIAE_CS42_2AL_TGACv1_095408_AA0310520	1	-	-
TRIAE_CS42_2AL_TGACv1_095451_AA0310900	1	-	-
TRIAE_CS42_2AL_TGACv1_095451_AA0310910	1	-	-
TRIAE_CS42_2AL_TGACv1_095464_AA0311090	1	-	-
TRIAE_CS42_2AL_TGACv1_095464_AA0311100	1	-	-
TRIAE_CS42_2AL_TGACv1_095471_AA0311250	1	-	-
TRIAE_CS42_2AL_TGACv1_095479_AA0311320	1	-	-
TRIAE_CS42_2AL_TGACv1_095482_AA0311380	1	-	-
TRIAE_CS42_2AL_TGACv1_095486_AA0311460	1	-	-
TRIAE_CS42_2AL_TGACv1_095500_AA0311610	1	-	-
TRIAE_CS42_2AL_TGACv1_095539_AA0311980	1	-	-
TRIAE_CS42_2AL_TGACv1_095546_AA0312010	1	-	-
TRIAE_CS42_2AL_TGACv1_095549_AA0312020	1	-	-
TRIAE_CS42_2AL_TGACv1_095579_AA0312310	1	-	-
TRIAE_CS42_2AL_TGACv1_095579_AA0312330	1	-	-
TRIAE_CS42_2AL_TGACv1_095579_AA0312340	1	-	-
TRIAE_CS42_2AL_TGACv1_095599_AA0312620	1	-	-
TRIAE_CS42_2AL_TGACv1_095600_AA0312690	1	-	-
TRIAE_CS42_2AL_TGACv1_095601_AA0312720	1	-	-
TRIAE_CS42_2AL_TGACv1_095602_AA0312740	1	-	-
TRIAE_CS42_2AL_TGACv1_095633_AA0313110	1	-	-
TRIAE_CS42_2AL_TGACv1_095635_AA0313170	1	-	-
TRIAE_CS42_2AL_TGACv1_095643_AA0313260	1	-	-
TRIAE_CS42_2AL_TGACv1_095643_AA0313280	1	-	-
TRIAE_CS42_2AL_TGACv1_095652_AA0313340	1	-	-
TRIAE_CS42_2AL_TGACv1_095652_AA0313360	1	-	-
TRIAE_CS42_2AL_TGACv1_095664_AA0313480	1	-	-
TRIAE_CS42_2AL_TGACv1_095674_AA0313620	1	-	-
TRIAE_CS42_2AL_TGACv1_095700_AA0313960	1	-	-
TRIAE_CS42_2AL_TGACv1_095719_AA0314000	1	-	-
TRIAE_CS42_2AL_TGACv1_095739_AA0314140	1	-	-
TRIAE_CS42_2AL_TGACv1_095789_AA0314530	1	-	-
TRIAE_CS42_2AL_TGACv1_095791_AA0314620	1	-	-
TRIAE_CS42_2AL_TGACv1_095802_AA0314670	1	-	-
TRIAE_CS42_2AL_TGACv1_095824_AA0314940	1	-	-
TRIAE_CS42_2AL_TGACv1_095840_AA0315020	1	-	-
TRIAE_CS42_2AL_TGACv1_095851_AA0315170	1	-	-
TRIAE_CS42_2AL_TGACv1_095868_AA0315310	1	-	-
TRIAE_CS42_2AL_TGACv1_095881_AA0315530	1	-	-
TRIAE_CS42_2AL_TGACv1_095883_AA0315540	1	-	-
TRIAE_CS42_2AL_TGACv1_095886_AA0315600	1	-	-
TRIAE_CS42_2AL_TGACv1_095887_AA0315620	1	-	-
TRIAE_CS42_2AL_TGACv1_095912_AA0315790	1	-	-
TRIAE_CS42_2AL_TGACv1_095914_AA0315810	1	-	-
TRIAE_CS42_2AL_TGACv1_095957_AA0316060	1	-	-
TRIAE_CS42_2AL_TGACv1_095993_AA0316480	1	-	-
TRIAE_CS42_2AL_TGACv1_096018_AA0316690	1	-	-
TRIAE_CS42_2AL_TGACv1_096087_AA0317090	1	-	-
TRIAE_CS42_2AL_TGACv1_096096_AA0317110	1	-	-
TRIAE_CS42_2AL_TGACv1_096113_AA0317240	1	-	-
TRIAE_CS42_2AL_TGACv1_096194_AA0317740	1	-	-
TRIAE_CS42_2AL_TGACv1_096213_AA0317870	1	-	-
TRIAE_CS42_2AL_TGACv1_096215_AA0317890	1	-	-
TRIAE_CS42_2AL_TGACv1_096263_AA0318290	1	-	-
TRIAE_CS42_2AL_TGACv1_096316_AA0318540	1	-	-
TRIAE_CS42_2AL_TGACv1_096326_AA0318630	1	-	-
TRIAE_CS42_2AL_TGACv1_096326_AA0318640	1	-	-
TRIAE_CS42_2AL_TGACv1_096326_AA0318650	1	-	-
TRIAE_CS42_2AL_TGACv1_096363_AA0318860	1	-	-
TRIAE_CS42_2AL_TGACv1_096383_AA0318980	1	bZIP	-
TRIAE_CS42_2AL_TGACv1_096493_AA0319440	1	-	-
TRIAE_CS42_2AL_TGACv1_096507_AA0319520	1	-	-
TRIAE_CS42_2AL_TGACv1_096521_AA0319660	1	bHLH	-
TRIAE_CS42_2AL_TGACv1_096521_AA0319670	1	-	-
TRIAE_CS42_2AL_TGACv1_096560_AA0319860	1	-	-
TRIAE_CS42_2AL_TGACv1_096577_AA0319980	1	-	-
TRIAE_CS42_2AL_TGACv1_096603_AA0320150	1	-	-
TRIAE_CS42_2AL_TGACv1_096603_AA0320160	1	-	-
TRIAE_CS42_2AL_TGACv1_096605_AA0320170	1	-	-
TRIAE_CS42_2AL_TGACv1_096643_AA0320440	1	-	-
TRIAE_CS42_2AL_TGACv1_096657_AA0320520	1	-	-
TRIAE_CS42_2AL_TGACv1_096698_AA0320740	1	-	-
TRIAE_CS42_2AL_TGACv1_096706_AA0320820	1	-	-
TRIAE_CS42_2AL_TGACv1_096747_AA0321100	1	-	-
TRIAE_CS42_2AL_TGACv1_096747_AA0321110	1	-	-
TRIAE_CS42_2AL_TGACv1_096759_AA0321200	1	-	-
TRIAE_CS42_2AL_TGACv1_096767_AA0321290	1	NAC	NAC-g
TRIAE_CS42_2AL_TGACv1_096846_AA0321730	1	-	-
TRIAE_CS42_2AL_TGACv1_096927_AA0322120	1	-	-
TRIAE_CS42_2AL_TGACv1_096963_AA0322310	1	-	-
TRIAE_CS42_2AL_TGACv1_096972_AA0322380	1	-	-
TRIAE_CS42_2AL_TGACv1_097025_AA0322650	1	-	-
TRIAE_CS42_2AL_TGACv1_097027_AA0322670	1	-	-
TRIAE_CS42_2AL_TGACv1_097035_AA0322740	1	-	-
TRIAE_CS42_2AL_TGACv1_097075_AA0322860	1	-	-
TRIAE_CS42_2AL_TGACv1_097088_AA0322930	1	-	-
TRIAE_CS42_2AL_TGACv1_097100_AA0322950	1	-	-
TRIAE_CS42_2AL_TGACv1_097112_AA0323000	1	-	-
TRIAE_CS42_2AL_TGACv1_097132_AA0323110	1	-	-
TRIAE_CS42_2AL_TGACv1_097153_AA0323230	1	-	-
TRIAE_CS42_2AL_TGACv1_097193_AA0323350	1	Nin-like	-
TRIAE_CS42_2AL_TGACv1_097254_AA0323570	1	-	-
TRIAE_CS42_2AL_TGACv1_097312_AA0323760	1	-	-
TRIAE_CS42_2AL_TGACv1_097354_AA0323890	1	-	-
TRIAE_CS42_2AL_TGACv1_097373_AA0323990	1	-	-
TRIAE_CS42_2AL_TGACv1_097448_AA0324210	1	AP2	-
TRIAE_CS42_2AL_TGACv1_097459_AA0324280	1	-	-
TRIAE_CS42_2AL_TGACv1_097485_AA0324350	1	-	-
TRIAE_CS42_2AL_TGACv1_097523_AA0324400	1	-	-
TRIAE_CS42_2AL_TGACv1_097997_AA0325440	1	-	-
TRIAE_CS42_2AL_TGACv1_098021_AA0325500	1	-	-
TRIAE_CS42_2AL_TGACv1_098058_AA0325610	1	-	-
TRIAE_CS42_2AL_TGACv1_098072_AA0325680	1	-	-
TRIAE_CS42_2AL_TGACv1_098239_AA0325810	1	-	-
TRIAE_CS42_2AL_TGACv1_098239_AA0325830	1	-	-
TRIAE_CS42_2AL_TGACv1_098281_AA0325880	1	-	-
TRIAE_CS42_2AL_TGACv1_098345_AA0326010	1	-	-
TRIAE_CS42_2AL_TGACv1_098620_AA0326460	1	-	-
TRIAE_CS42_2AL_TGACv1_099884_AA0327360	1	-	-
TRIAE_CS42_2AS_TGACv1_112055_AA0328940	1	-	-
TRIAE_CS42_2AS_TGACv1_112071_AA0329450	1	-	-
TRIAE_CS42_2AS_TGACv1_112071_AA0329470	1	-	-
TRIAE_CS42_2AS_TGACv1_112080_AA0329820	1	-	-
TRIAE_CS42_2AS_TGACv1_112094_AA0330110	1	-	-
TRIAE_CS42_2AS_TGACv1_112095_AA0330140	1	-	-
TRIAE_CS42_2AS_TGACv1_112095_AA0330150	1	-	-
TRIAE_CS42_2AS_TGACv1_112101_AA0330340	1	-	-
TRIAE_CS42_2AS_TGACv1_112101_AA0330410	1	-	-
TRIAE_CS42_2AS_TGACv1_112113_AA0330750	1	-	-
TRIAE_CS42_2AS_TGACv1_112113_AA0330780	1	-	-
TRIAE_CS42_2AS_TGACv1_112117_AA0330860	1	-	-
TRIAE_CS42_2AS_TGACv1_112121_AA0330980	1	-	-
TRIAE_CS42_2AS_TGACv1_112143_AA0331340	1	-	-
TRIAE_CS42_2AS_TGACv1_112149_AA0331510	1	-	-
TRIAE_CS42_2AS_TGACv1_112159_AA0331760	1	-	-
TRIAE_CS42_2AS_TGACv1_112164_AA0332000	1	-	-
TRIAE_CS42_2AS_TGACv1_112164_AA0332060	1	-	-
TRIAE_CS42_2AS_TGACv1_112164_AA0332090	1	-	-
TRIAE_CS42_2AS_TGACv1_112168_AA0332230	1	-	-
TRIAE_CS42_2AS_TGACv1_112185_AA0332560	1	-	-
TRIAE_CS42_2AS_TGACv1_112187_AA0332610	1	-	-
TRIAE_CS42_2AS_TGACv1_112187_AA0332620	1	-	-
TRIAE_CS42_2AS_TGACv1_112193_AA0332820	1	-	-
TRIAE_CS42_2AS_TGACv1_112201_AA0333180	1	-	-
TRIAE_CS42_2AS_TGACv1_112209_AA0333390	1	-	-
TRIAE_CS42_2AS_TGACv1_112221_AA0333630	1	G2-like	-
TRIAE_CS42_2AS_TGACv1_112257_AA0334250	1	-	-
TRIAE_CS42_2AS_TGACv1_112271_AA0334580	1	-	-
TRIAE_CS42_2AS_TGACv1_112273_AA0334620	1	-	-
TRIAE_CS42_2AS_TGACv1_112273_AA0334660	1	-	-
TRIAE_CS42_2AS_TGACv1_112278_AA0334690	1	-	-
TRIAE_CS42_2AS_TGACv1_112279_AA0334840	1	-	-
TRIAE_CS42_2AS_TGACv1_112296_AA0335070	1	-	-
TRIAE_CS42_2AS_TGACv1_112305_AA0335160	1	-	-
TRIAE_CS42_2AS_TGACv1_112322_AA0335300	1	-	-
TRIAE_CS42_2AS_TGACv1_112326_AA0335440	1	-	-
TRIAE_CS42_2AS_TGACv1_112329_AA0335500	1	-	-
TRIAE_CS42_2AS_TGACv1_112330_AA0335600	1	-	-
TRIAE_CS42_2AS_TGACv1_112339_AA0335910	1	-	-
TRIAE_CS42_2AS_TGACv1_112339_AA0335930	1	-	-
TRIAE_CS42_2AS_TGACv1_112343_AA0336050	1	-	-
TRIAE_CS42_2AS_TGACv1_112346_AA0336090	1	-	-
TRIAE_CS42_2AS_TGACv1_112362_AA0336340	1	-	-
TRIAE_CS42_2AS_TGACv1_112365_AA0336460	1	-	-
TRIAE_CS42_2AS_TGACv1_112388_AA0336980	1	WRKY	-
TRIAE_CS42_2AS_TGACv1_112398_AA0337310	1	-	-
TRIAE_CS42_2AS_TGACv1_112414_AA0337580	1	-	-
TRIAE_CS42_2AS_TGACv1_112466_AA0338620	1	-	-
TRIAE_CS42_2AS_TGACv1_112477_AA0338800	1	-	-
TRIAE_CS42_2AS_TGACv1_112481_AA0338900	1	-	-
TRIAE_CS42_2AS_TGACv1_112486_AA0338970	1	-	-
TRIAE_CS42_2AS_TGACv1_112503_AA0339440	1	-	-
TRIAE_CS42_2AS_TGACv1_112504_AA0339490	1	-	-
TRIAE_CS42_2AS_TGACv1_112511_AA0339640	1	-	-
TRIAE_CS42_2AS_TGACv1_112512_AA0339680	1	-	-
TRIAE_CS42_2AS_TGACv1_112531_AA0340030	1	-	-
TRIAE_CS42_2AS_TGACv1_112535_AA0340070	1	-	-
TRIAE_CS42_2AS_TGACv1_112537_AA0340220	1	-	-
TRIAE_CS42_2AS_TGACv1_112552_AA0340640	1	-	-
TRIAE_CS42_2AS_TGACv1_112552_AA0340650	1	-	-
TRIAE_CS42_2AS_TGACv1_112552_AA0340660	1	-	-
TRIAE_CS42_2AS_TGACv1_112552_AA0340670	1	-	-
TRIAE_CS42_2AS_TGACv1_112552_AA0340680	1	-	-
TRIAE_CS42_2AS_TGACv1_112552_AA0340700	1	-	-
TRIAE_CS42_2AS_TGACv1_112552_AA0340710	1	-	-
TRIAE_CS42_2AS_TGACv1_112554_AA0340880	1	-	-
TRIAE_CS42_2AS_TGACv1_112579_AA0341460	1	-	-
TRIAE_CS42_2AS_TGACv1_112595_AA0341820	1	-	-
TRIAE_CS42_2AS_TGACv1_112596_AA0341870	1	-	-
TRIAE_CS42_2AS_TGACv1_112606_AA0342110	1	-	-
TRIAE_CS42_2AS_TGACv1_112612_AA0342280	1	-	-
TRIAE_CS42_2AS_TGACv1_112613_AA0342320	1	-	-
TRIAE_CS42_2AS_TGACv1_112618_AA0342340	1	-	-
TRIAE_CS42_2AS_TGACv1_112618_AA0342360	1	-	-
TRIAE_CS42_2AS_TGACv1_112629_AA0342550	1	-	-
TRIAE_CS42_2AS_TGACv1_112635_AA0342680	1	-	-
TRIAE_CS42_2AS_TGACv1_112635_AA0342750	1	-	-
TRIAE_CS42_2AS_TGACv1_112669_AA0343080	1	BES1	-
TRIAE_CS42_2AS_TGACv1_112673_AA0343140	1	-	-
TRIAE_CS42_2AS_TGACv1_112675_AA0343240	1	-	-
TRIAE_CS42_2AS_TGACv1_112678_AA0343310	1	-	-
TRIAE_CS42_2AS_TGACv1_112681_AA0343350	1	-	-
TRIAE_CS42_2AS_TGACv1_112681_AA0343360	1	-	-
TRIAE_CS42_2AS_TGACv1_112683_AA0343380	1	-	-
TRIAE_CS42_2AS_TGACv1_112687_AA0343450	1	-	-
TRIAE_CS42_2AS_TGACv1_112698_AA0343610	1	-	-
TRIAE_CS42_2AS_TGACv1_112738_AA0344310	1	-	-
TRIAE_CS42_2AS_TGACv1_112740_AA0344400	1	-	-
TRIAE_CS42_2AS_TGACv1_112749_AA0344590	1	-	-
TRIAE_CS42_2AS_TGACv1_112755_AA0344780	1	-	-
TRIAE_CS42_2AS_TGACv1_112755_AA0344810	1	-	-
TRIAE_CS42_2AS_TGACv1_112797_AA0345350	1	-	-
TRIAE_CS42_2AS_TGACv1_112825_AA0345810	1	-	-
TRIAE_CS42_2AS_TGACv1_112828_AA0345830	1	-	-
TRIAE_CS42_2AS_TGACv1_112842_AA0346070	1	-	-
TRIAE_CS42_2AS_TGACv1_112852_AA0346180	1	-	-
TRIAE_CS42_2AS_TGACv1_112882_AA0346500	1	-	-
TRIAE_CS42_2AS_TGACv1_112882_AA0346520	1	-	-
TRIAE_CS42_2AS_TGACv1_112900_AA0347180	1	-	-
TRIAE_CS42_2AS_TGACv1_112901_AA0347220	1	-	-
TRIAE_CS42_2AS_TGACv1_112913_AA0347570	1	-	-
TRIAE_CS42_2AS_TGACv1_112925_AA0347830	1	-	-
TRIAE_CS42_2AS_TGACv1_112925_AA0347940	1	-	-
TRIAE_CS42_2AS_TGACv1_112936_AA0348060	1	-	-
TRIAE_CS42_2AS_TGACv1_112957_AA0348680	1	-	-
TRIAE_CS42_2AS_TGACv1_112987_AA0349260	1	-	-
TRIAE_CS42_2AS_TGACv1_112987_AA0349270	1	-	-
TRIAE_CS42_2AS_TGACv1_112990_AA0349300	1	-	-
TRIAE_CS42_2AS_TGACv1_112995_AA0349380	1	-	-
TRIAE_CS42_2AS_TGACv1_113011_AA0349640	1	-	-
TRIAE_CS42_2AS_TGACv1_113018_AA0349830	1	WRKY	-
TRIAE_CS42_2AS_TGACv1_113023_AA0349940	1	-	-
TRIAE_CS42_2AS_TGACv1_113028_AA0350040	1	-	-
TRIAE_CS42_2AS_TGACv1_113028_AA0350120	1	-	-
TRIAE_CS42_2AS_TGACv1_113043_AA0350340	1	-	-
TRIAE_CS42_2AS_TGACv1_113065_AA0350650	1	-	-
TRIAE_CS42_2AS_TGACv1_113065_AA0350660	1	-	-
TRIAE_CS42_2AS_TGACv1_113072_AA0350720	1	-	-
TRIAE_CS42_2AS_TGACv1_113097_AA0351150	1	C3H	-
TRIAE_CS42_2AS_TGACv1_113153_AA0352210	1	-	-
TRIAE_CS42_2AS_TGACv1_113164_AA0352370	1	-	-
TRIAE_CS42_2AS_TGACv1_113173_AA0352560	1	-	-
TRIAE_CS42_2AS_TGACv1_113174_AA0352570	1	-	-
TRIAE_CS42_2AS_TGACv1_113182_AA0352660	1	-	-
TRIAE_CS42_2AS_TGACv1_113182_AA0352670	1	-	-
TRIAE_CS42_2AS_TGACv1_113198_AA0352950	1	-	-
TRIAE_CS42_2AS_TGACv1_113199_AA0352960	1	-	-
TRIAE_CS42_2AS_TGACv1_113225_AA0353170	1	-	-
TRIAE_CS42_2AS_TGACv1_113244_AA0353440	1	bZIP	-
TRIAE_CS42_2AS_TGACv1_113271_AA0353770	1	B3	-
TRIAE_CS42_2AS_TGACv1_113283_AA0353900	1	-	-
TRIAE_CS42_2AS_TGACv1_113287_AA0353970	1	-	-
TRIAE_CS42_2AS_TGACv1_113289_AA0354110	1	-	-
TRIAE_CS42_2AS_TGACv1_113329_AA0354470	1	-	-
TRIAE_CS42_2AS_TGACv1_113337_AA0354650	1	-	-
TRIAE_CS42_2AS_TGACv1_113342_AA0354730	1	-	-
TRIAE_CS42_2AS_TGACv1_113355_AA0354920	1	-	-
TRIAE_CS42_2AS_TGACv1_113355_AA0354930	1	-	-
TRIAE_CS42_2AS_TGACv1_113370_AA0355160	1	-	-
TRIAE_CS42_2AS_TGACv1_113394_AA0355460	1	-	-
TRIAE_CS42_2AS_TGACv1_113398_AA0355540	1	-	-
TRIAE_CS42_2AS_TGACv1_113444_AA0356080	1	-	-
TRIAE_CS42_2AS_TGACv1_113444_AA0356090	1	-	-
TRIAE_CS42_2AS_TGACv1_113461_AA0356340	1	-	-
TRIAE_CS42_2AS_TGACv1_113464_AA0356490	1	-	-
TRIAE_CS42_2AS_TGACv1_113484_AA0356750	1	-	-
TRIAE_CS42_2AS_TGACv1_113503_AA0356980	1	-	-
TRIAE_CS42_2AS_TGACv1_113521_AA0357170	1	-	-
TRIAE_CS42_2AS_TGACv1_113521_AA0357190	1	-	-
[truncated: 59,327 more rows]
